# Supplementary material for: Transcriptomic, Metabolomic and Ionomic Analyses Reveal Early Modulation of Leaf Mineral Content in Brassica napus under Mild or Severe Drought
Source: MDPI journal article supplement (doi:10.3390/ijms23020781), 2022-01-11

**Supplementary Figure S4:** (A) Expression profiles of target genes used for RNAseq validation; (B) Spearman correlation and confidence interval between log2 fold change ratio from RNA-seq and RT-qPCR.

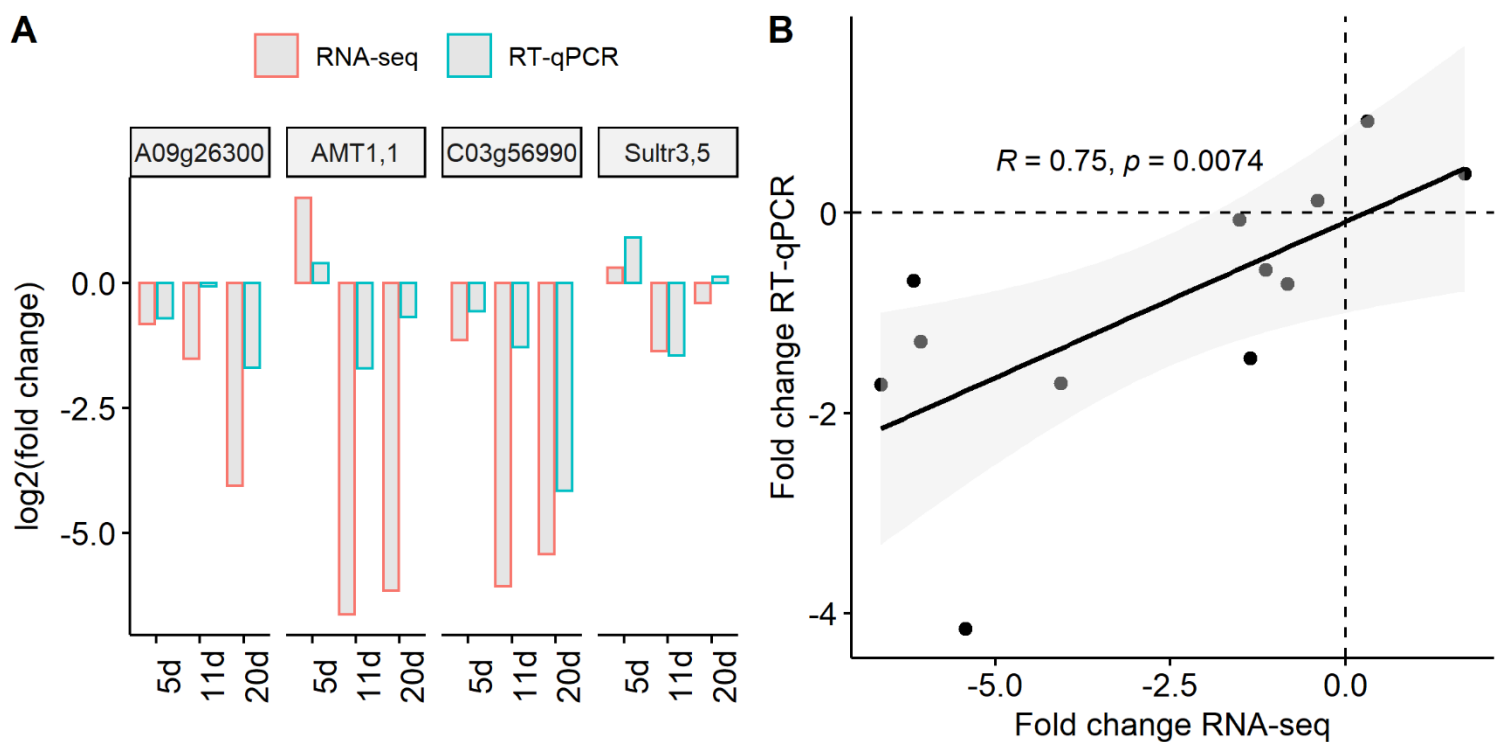

Supplement: s1 [file s1]
