# Supplementary material for: Transcriptomic, Metabolomic and Ionomic Analyses Reveal Early Modulation of Leaf Mineral Content in Brassica napus under Mild or Severe Drought
Source: MDPI journal article supplement (doi:10.3390/ijms23020781), 2022-01-11
Supplement: s1 [file s1]

**Supplementary Table S1:** Physical and chemical soil properties

| Soil properties                                            | Methods of anaysis                   | Value |
|------------------------------------------------------------|--------------------------------------|-------|
| Exchangeable CaO (‰)                                       | NFX 31-108 - ICP AES                 | 2.14  |
| Total nitrogen (‰)                                         | NF ISO 13 878 - Dumas method         | 1.22  |
| Exchangeable MgO (‰)                                       | NFX 31-108 - ICP AES                 | 0.46  |
| P <sub>2</sub> O <sub>5</sub> (‰)                          | NFX 31-160 - Dyer method             | 0.18  |
| Exchangeable K <sub>2</sub> O (‰)                          | NFX 31-108 - ICP AES                 | 0.093 |
| SO <sub>3</sub> (KH <sub>2</sub> PO <sub>4</sub> ) (mg/Kg) | Extr. KH2PO4 - ICP AES               | 186   |
| P <sub>2</sub> O <sub>5</sub> (‰)                          | NFX 31-161 - Joret Hébert method     | 0.076 |
| Exchangeable Na <sub>2</sub> O (‰)                         | NFX 31-108 - ICP AES                 | 0.035 |
| P <sub>2</sub> O <sub>5</sub> (‰)                          | NF ISO 11263 - Olsen method          | 0.048 |
| Cu EDTA (mg/Kg)                                            | NFX 31-120 - ICP AES                 | 1.2   |
| Soluble boron Eau (mg/Kg)                                  | NFX 31-122                           | 0.16  |
| Fe EDTA (mg/Kg)                                            | NFX 31-120 - ICP AES                 | 49.1  |
| Mn EDTA (mg/Kg)                                            | NFX 31-120 - ICP AES                 | 23.8  |
| Zn EDTA (mg/Kg)                                            | NFX 31-120 - ICP AES                 | 1.4   |
| Clay (‰)                                                   | NFX 31-107 - without decarbonatation | 31    |
| C/N                                                        | NF ISO 13 878 - Dumas method         | 42.9  |
| Organic carbon (‰)                                         | NF ISO 14 235                        | 52.3  |
| CEC (me/Kg)                                                | NFX 31-130 - Metson method           | 110   |
| Fine silt (s.déc) (‰)                                      | NFX 31-107 - without decarbonatation | 24    |
| Coarse silt (s.déc) (‰)                                    | NFX 31-107 - without decarbonatation | 6.1   |
| Organic matter (‰)                                         | NF ISO 14 235                        | 90.4  |
| Water pH                                                   | NF ISO 10 390                        | 6.2   |
| KCl pH                                                     | NF ISO 10 390                        | 5.9   |
| Fine sand (‰)                                              | NFX 31-107 - without decarbonatation | 36    |
| Coarse sand (‰)                                            | NFX 31-107 - without decarbonatation | 903   |
