# Supplementary material for: Transcriptomic, Metabolomic and Ionomic Analyses Reveal Early Modulation of Leaf Mineral Content in Brassica napus under Mild or Severe Drought
Source: MDPI journal article supplement (doi:10.3390/ijms23020781), 2022-01-11
Supplement: s1 [file s1]

**Supplementary Table S2:** Composition of the nutrient solution derived from Hoagland nutrient solution and adapted to ensure the plants’ mineral needs during the experiment. Elemental concentrations were kept balanced in solution to provide 40 kg N ha-1 to ensure a non-limiting mineral condition for all the experiments.

| Salts                                                           | Salt concentrations (µM) | Nutrients | Elemental concentrations in solution (µM) | input kg ha <sup>-1</sup> |
|-----------------------------------------------------------------|--------------------------|-----------|-------------------------------------------|---------------------------|
| KNO <sub>3</sub>                                                | 1000                     | N         | 3500                                      | 40                        |
| Ca(NO <sub>3</sub> ) <sub>2</sub> +4H <sub>2</sub> O            | 1250                     | Mg        | 400                                       | 8                         |
| Si(OH) <sub>4</sub>                                             | 900                      | P         | 200                                       | 5                         |
| HCl                                                             | 600                      | S         | 507                                       | 13                        |
| CaCl <sub>2</sub> + 2H <sub>2</sub> O                           | 500                      | K         | 1500                                      | 48                        |
| MgSO <sub>4</sub>                                               | 400                      | Ca        | 2110                                      | 69                        |
| CaCO <sub>3</sub>                                               | 360                      | B         | 10                                        | 0.09                      |
| KH <sub>2</sub> PO <sub>4</sub>                                 | 200                      | Cl        | 2001                                      | 58                        |
| Na <sub>2</sub> SiO <sub>3</sub>                                | 200                      | Mn        | 3                                         | 0.13                      |
| K <sub>2</sub> SO <sub>4</sub>                                  | 100                      | Fe        | 100                                       | 5                         |
| KCl                                                             | 100                      | Ni        | 0.15                                      | 0.007                     |
| NaFe-EDTA                                                       |                          |           |                                           |                           |
| 3H <sub>2</sub> O                                               | 50                       | Cu        | 0.7                                       | 0.04                      |
| NaFe-EDDHA                                                      | 50                       | Zn        | 3                                         | 0.16                      |
| H <sub>3</sub> BO <sub>3</sub>                                  | 10                       | Mo        | 0.056                                     | 0.004                     |
| MnSO <sub>4</sub>                                               | 3                        | Na        | 500                                       | 9                         |
| ZnSO <sub>4</sub>                                               | 3                        | Al        |                                           |                           |
| CuSO <sub>4</sub>                                               | 0.7                      | Si        | 1100                                      | 25                        |
| NiCl <sub>2</sub>                                               | 0.15                     | V         |                                           |                           |
| CoCl <sub>2</sub>                                               | 0.1                      | Co        | 0.1                                       | 0.005                     |
| Na <sub>2</sub> SeO <sub>4</sub>                                | 0.01                     | Se        | 0.01                                      | 0.001                     |
| (NH <sub>4</sub> ) <sub>6</sub> Mo <sub>7</sub> O <sub>24</sub> | 0.008                    |           |                                           |                           |
