# Supplementary material for: Transcriptomic, Metabolomic and Ionomic Analyses Reveal Early Modulation of Leaf Mineral Content in Brassica napus under Mild or Severe Drought
Source: Int J Mol Sci. 2022 Jan 11;23(2):781. doi: 10.3390/ijms23020781 (PMC8776245; doi:10.3390/ijms23020781)
Supplement: Supplementary file 1 [file ijms-23-00781-s001.zip]

Archive with 10 entries (10 files):
- Suplementary Table S1.pdf
- Suplementary Table S2.pdf
- Supplementary Data 1.xlsx
- Supplementary Data 2.xlsx
- Supplementary Data 3.xlsx
- Supplementary Data 4.xlsx
- Supplementary Figure S1.pdf
- Supplementary Figure S2.pdf
- Supplementary Figure S3.pdf
- Supplementary Figure S4.pdf
