# Supplementary material for: Transcriptomic, Metabolomic and Ionomic Analyses Reveal Early Modulation of Leaf Mineral Content in Brassica napus under Mild or Severe Drought
Source: Int J Mol Sci. 2022 Jan 11;23(2):781. doi: 10.3390/ijms23020781 (PMC8776245; doi:10.3390/ijms23020781)
Supplement: Supplementary file 1 [file ijms-23-00781-s001.zip › Supplementary Data 1.xlsx]

## Sheet: Legend
GO terms enrichment for “Biological Processes” determined by g:Profiler with DEGs from Brassica napus leaves developped during a water deficit.
g:Profiler available at:		https://biit.cs.ut.ee/gprofiler/gost

## Sheet: 5d
source	name	term_id	adjusted_p_value	-log10(adjPval)	Genes
Biological process	ornithine transport	GO:0015822	0.0290694	1.53656	GSBRNA2T00058081001,GSBRNA2T00063399001
Biological process	regulation of nucleobase-containing compound metabolic process	GO:0019219	0.0290694	1.53656	GSBRNA2T00085404001,GSBRNA2T00068714001,GSBRNA2T00098554001,GSBRNA2T00090639001,GSBRNA2T00149587001,GSBRNA2T00097410001,GSBRNA2T00036858001,GSBRNA2T00065055001,GSBRNA2T00157484001,GSBRNA2T00097409001,GSBRNA2T00048645001,GSBRNA2T00014742001,GSBRNA2T00019791001,GSBRNA2T00021236001,GSBRNA2T00084186001,GSBRNA2T00137481001,GSBRNA2T00075271001,GSBRNA2T00055665001,GSBRNA2T00006095001,GSBRNA2T00072378001…
Biological process	borate transmembrane transport	GO:0035445	0.0290694	1.53656	GSBRNA2T00003348001,GSBRNA2T00038178001
Biological process	regulation of cellular metabolic process	GO:0031323	0.0290694	1.53656	GSBRNA2T00085404001,GSBRNA2T00068714001,GSBRNA2T00124863001,GSBRNA2T00014080001,GSBRNA2T00098554001,GSBRNA2T00090639001,GSBRNA2T00149587001,GSBRNA2T00097410001,GSBRNA2T00036858001,GSBRNA2T00065055001,GSBRNA2T00157484001,GSBRNA2T00097409001,GSBRNA2T00048645001,GSBRNA2T00014742001,GSBRNA2T00019791001,GSBRNA2T00021236001,GSBRNA2T00084186001,GSBRNA2T00137481001,GSBRNA2T00075271001,GSBRNA2T00055665001…
Biological process	regulation of cellular biosynthetic process	GO:0031326	0.0290694	1.53656	GSBRNA2T00085404001,GSBRNA2T00068714001,GSBRNA2T00098554001,GSBRNA2T00090639001,GSBRNA2T00149587001,GSBRNA2T00097410001,GSBRNA2T00036858001,GSBRNA2T00065055001,GSBRNA2T00157484001,GSBRNA2T00097409001,GSBRNA2T00048645001,GSBRNA2T00014742001,GSBRNA2T00019791001,GSBRNA2T00021236001,GSBRNA2T00084186001,GSBRNA2T00137481001,GSBRNA2T00006095001,GSBRNA2T00072378001,GSBRNA2T00133129001,GSBRNA2T00079090001…
Biological process	borate transport	GO:0046713	0.0290694	1.53656	GSBRNA2T00003348001,GSBRNA2T00038178001
Biological process	L-ornithine transmembrane transport	GO:1903352	0.0290694	1.53656	GSBRNA2T00058081001,GSBRNA2T00063399001
Biological process	anion transmembrane transport	GO:0098656	0.0290694	1.53656	GSBRNA2T00027084001,GSBRNA2T00003348001,GSBRNA2T00058081001,GSBRNA2T00031583001,GSBRNA2T00038178001,GSBRNA2T00135625001,GSBRNA2T00063399001,GSBRNA2T00097164001
Biological process	inorganic anion transmembrane transport	GO:0098661	0.0290694	1.53656	GSBRNA2T00003348001,GSBRNA2T00031583001,GSBRNA2T00038178001,GSBRNA2T00135625001,GSBRNA2T00097164001
Biological process	response to oxygen-containing compound	GO:1901700	0.0290694	1.53656	GSBRNA2T00124863001,GSBRNA2T00015754001,GSBRNA2T00047387001,GSBRNA2T00015198001,GSBRNA2T00014080001,GSBRNA2T00075446001,GSBRNA2T00074154001,GSBRNA2T00043891001,GSBRNA2T00035397001,GSBRNA2T00050618001,GSBRNA2T00124314001,GSBRNA2T00033887001
Biological process	inorganic anion transport	GO:0015698	0.0290694	1.53656	GSBRNA2T00047387001,GSBRNA2T00015198001,GSBRNA2T00003348001,GSBRNA2T00035397001,GSBRNA2T00031583001,GSBRNA2T00038178001,GSBRNA2T00129931001,GSBRNA2T00135625001,GSBRNA2T00097164001
Biological process	regulation of nucleic acid-templated transcription	GO:1903506	0.0290694	1.53656	GSBRNA2T00085404001,GSBRNA2T00068714001,GSBRNA2T00098554001,GSBRNA2T00090639001,GSBRNA2T00149587001,GSBRNA2T00097410001,GSBRNA2T00036858001,GSBRNA2T00065055001,GSBRNA2T00157484001,GSBRNA2T00097409001,GSBRNA2T00048645001,GSBRNA2T00014742001,GSBRNA2T00019791001,GSBRNA2T00021236001,GSBRNA2T00084186001,GSBRNA2T00137481001,GSBRNA2T00006095001,GSBRNA2T00072378001,GSBRNA2T00133129001,GSBRNA2T00079090001…
Biological process	mitochondrial L-ornithine transmembrane transport	GO:1990575	0.0290694	1.53656	GSBRNA2T00058081001,GSBRNA2T00063399001
Biological process	regulation of RNA metabolic process	GO:0051252	0.0290694	1.53656	GSBRNA2T00085404001,GSBRNA2T00068714001,GSBRNA2T00098554001,GSBRNA2T00090639001,GSBRNA2T00149587001,GSBRNA2T00097410001,GSBRNA2T00036858001,GSBRNA2T00065055001,GSBRNA2T00157484001,GSBRNA2T00097409001,GSBRNA2T00048645001,GSBRNA2T00014742001,GSBRNA2T00019791001,GSBRNA2T00021236001,GSBRNA2T00084186001,GSBRNA2T00137481001,GSBRNA2T00075271001,GSBRNA2T00055665001,GSBRNA2T00006095001,GSBRNA2T00072378001…
Biological process	regulation of macromolecule biosynthetic process	GO:0010556	0.0290694	1.53656	GSBRNA2T00085404001,GSBRNA2T00068714001,GSBRNA2T00098554001,GSBRNA2T00090639001,GSBRNA2T00149587001,GSBRNA2T00097410001,GSBRNA2T00036858001,GSBRNA2T00065055001,GSBRNA2T00157484001,GSBRNA2T00097409001,GSBRNA2T00048645001,GSBRNA2T00014742001,GSBRNA2T00019791001,GSBRNA2T00021236001,GSBRNA2T00084186001,GSBRNA2T00137481001,GSBRNA2T00006095001,GSBRNA2T00072378001,GSBRNA2T00133129001,GSBRNA2T00079090001…
Biological process	regulation of RNA biosynthetic process	GO:2001141	0.0290694	1.53656	GSBRNA2T00085404001,GSBRNA2T00068714001,GSBRNA2T00098554001,GSBRNA2T00090639001,GSBRNA2T00149587001,GSBRNA2T00097410001,GSBRNA2T00036858001,GSBRNA2T00065055001,GSBRNA2T00157484001,GSBRNA2T00097409001,GSBRNA2T00048645001,GSBRNA2T00014742001,GSBRNA2T00019791001,GSBRNA2T00021236001,GSBRNA2T00084186001,GSBRNA2T00137481001,GSBRNA2T00006095001,GSBRNA2T00072378001,GSBRNA2T00133129001,GSBRNA2T00079090001…
Biological process	regulation of cellular macromolecule biosynthetic process	GO:2000112	0.0290694	1.53656	GSBRNA2T00085404001,GSBRNA2T00068714001,GSBRNA2T00098554001,GSBRNA2T00090639001,GSBRNA2T00149587001,GSBRNA2T00097410001,GSBRNA2T00036858001,GSBRNA2T00065055001,GSBRNA2T00157484001,GSBRNA2T00097409001,GSBRNA2T00048645001,GSBRNA2T00014742001,GSBRNA2T00019791001,GSBRNA2T00021236001,GSBRNA2T00084186001,GSBRNA2T00137481001,GSBRNA2T00006095001,GSBRNA2T00072378001,GSBRNA2T00133129001,GSBRNA2T00079090001…
Biological process	anion transport	GO:0006820	0.0290694	1.53656	GSBRNA2T00047387001,GSBRNA2T00015198001,GSBRNA2T00027084001,GSBRNA2T00003348001,GSBRNA2T00035397001,GSBRNA2T00058081001,GSBRNA2T00031583001,GSBRNA2T00038178001,GSBRNA2T00129931001,GSBRNA2T00135625001,GSBRNA2T00063399001,GSBRNA2T00097164001
Biological process	disaccharide metabolic process	GO:0005984	0.0290694	1.53656	GSBRNA2T00137296001,GSBRNA2T00140859001,GSBRNA2T00044972001,GSBRNA2T00003564001,GSBRNA2T00153227001,GSBRNA2T00020794001
Biological process	regulation of transcription, DNA-templated	GO:0006355	0.0290694	1.53656	GSBRNA2T00085404001,GSBRNA2T00068714001,GSBRNA2T00098554001,GSBRNA2T00090639001,GSBRNA2T00149587001,GSBRNA2T00097410001,GSBRNA2T00036858001,GSBRNA2T00065055001,GSBRNA2T00157484001,GSBRNA2T00097409001,GSBRNA2T00048645001,GSBRNA2T00014742001,GSBRNA2T00019791001,GSBRNA2T00021236001,GSBRNA2T00084186001,GSBRNA2T00137481001,GSBRNA2T00006095001,GSBRNA2T00072378001,GSBRNA2T00133129001,GSBRNA2T00079090001…
Biological process	regulation of biosynthetic process	GO:0009889	0.0290694	1.53656	GSBRNA2T00085404001,GSBRNA2T00068714001,GSBRNA2T00098554001,GSBRNA2T00090639001,GSBRNA2T00149587001,GSBRNA2T00097410001,GSBRNA2T00036858001,GSBRNA2T00065055001,GSBRNA2T00157484001,GSBRNA2T00097409001,GSBRNA2T00048645001,GSBRNA2T00014742001,GSBRNA2T00019791001,GSBRNA2T00021236001,GSBRNA2T00084186001,GSBRNA2T00137481001,GSBRNA2T00006095001,GSBRNA2T00072378001,GSBRNA2T00133129001,GSBRNA2T00079090001…
Biological process	trehalose metabolic process	GO:0005991	0.0290694	1.53656	GSBRNA2T00044972001,GSBRNA2T00003564001,GSBRNA2T00153227001,GSBRNA2T00020794001
Biological process	trehalose biosynthetic process	GO:0005992	0.0290694	1.53656	GSBRNA2T00044972001,GSBRNA2T00003564001,GSBRNA2T00153227001,GSBRNA2T00020794001
Biological process	response to nitrate	GO:0010167	0.0307607	1.512	GSBRNA2T00047387001,GSBRNA2T00015198001,GSBRNA2T00035397001
Biological process	oligosaccharide metabolic process	GO:0009311	0.0307607	1.512	GSBRNA2T00137296001,GSBRNA2T00140859001,GSBRNA2T00044972001,GSBRNA2T00003564001,GSBRNA2T00153227001,GSBRNA2T00020794001
Biological process	pyridoxine biosynthetic process	GO:0008615	0.0314998	1.50169	GSBRNA2T00037251001,GSBRNA2T00097164001
Biological process	nucleic acid-templated transcription	GO:0097659	0.0436585	1.35993	GSBRNA2T00085404001,GSBRNA2T00068714001,GSBRNA2T00098554001,GSBRNA2T00090639001,GSBRNA2T00149587001,GSBRNA2T00097410001,GSBRNA2T00036858001,GSBRNA2T00065055001,GSBRNA2T00157484001,GSBRNA2T00097409001,GSBRNA2T00048645001,GSBRNA2T00014742001,GSBRNA2T00079686001,GSBRNA2T00019791001,GSBRNA2T00021236001,GSBRNA2T00084186001,GSBRNA2T00137481001,GSBRNA2T00018817001,GSBRNA2T00006095001,GSBRNA2T00072378001…
Biological process	transcription, DNA-templated	GO:0006351	0.0436585	1.35993	GSBRNA2T00085404001,GSBRNA2T00068714001,GSBRNA2T00098554001,GSBRNA2T00090639001,GSBRNA2T00149587001,GSBRNA2T00097410001,GSBRNA2T00036858001,GSBRNA2T00065055001,GSBRNA2T00157484001,GSBRNA2T00097409001,GSBRNA2T00048645001,GSBRNA2T00014742001,GSBRNA2T00079686001,GSBRNA2T00019791001,GSBRNA2T00021236001,GSBRNA2T00084186001,GSBRNA2T00137481001,GSBRNA2T00018817001,GSBRNA2T00006095001,GSBRNA2T00072378001…
Biological process	polyamine catabolic process	GO:0006598	0.0436585	1.35993	GSBRNA2T00090976001,GSBRNA2T00014102001
Biological process	pyridoxine metabolic process	GO:0008614	0.0436585	1.35993	GSBRNA2T00037251001,GSBRNA2T00097164001
Biological process	RNA biosynthetic process	GO:0032774	0.0447225	1.34947	GSBRNA2T00085404001,GSBRNA2T00068714001,GSBRNA2T00098554001,GSBRNA2T00090639001,GSBRNA2T00149587001,GSBRNA2T00097410001,GSBRNA2T00036858001,GSBRNA2T00065055001,GSBRNA2T00157484001,GSBRNA2T00097409001,GSBRNA2T00048645001,GSBRNA2T00014742001,GSBRNA2T00079686001,GSBRNA2T00019791001,GSBRNA2T00021236001,GSBRNA2T00084186001,GSBRNA2T00137481001,GSBRNA2T00018817001,GSBRNA2T00006095001,GSBRNA2T00072378001…
Biological process	regulation of nitrogen compound metabolic process	GO:0051171	0.0465766	1.33183	GSBRNA2T00085404001,GSBRNA2T00068714001,GSBRNA2T00124863001,GSBRNA2T00014080001,GSBRNA2T00098554001,GSBRNA2T00090639001,GSBRNA2T00149587001,GSBRNA2T00097410001,GSBRNA2T00036858001,GSBRNA2T00065055001,GSBRNA2T00157484001,GSBRNA2T00097409001,GSBRNA2T00048645001,GSBRNA2T00014742001,GSBRNA2T00019791001,GSBRNA2T00021236001,GSBRNA2T00084186001,GSBRNA2T00137481001,GSBRNA2T00075271001,GSBRNA2T00055665001…
Biological process	proline catabolic process	GO:0006562	0.0465766	1.33183	GSBRNA2T00008196001,GSBRNA2T00142964001
Biological process	regulation of gene expression	GO:0010468	0.0465766	1.33183	GSBRNA2T00085404001,GSBRNA2T00068714001,GSBRNA2T00098554001,GSBRNA2T00090639001,GSBRNA2T00149587001,GSBRNA2T00097410001,GSBRNA2T00036858001,GSBRNA2T00065055001,GSBRNA2T00157484001,GSBRNA2T00097409001,GSBRNA2T00048645001,GSBRNA2T00014742001,GSBRNA2T00019791001,GSBRNA2T00021236001,GSBRNA2T00084186001,GSBRNA2T00137481001,GSBRNA2T00075271001,GSBRNA2T00055665001,GSBRNA2T00006095001,GSBRNA2T00072378001…
Biological process	response to UV-B	GO:0010224	0.0465766	1.33183	GSBRNA2T00094752001,GSBRNA2T00047537001
Biological process	regulation of primary metabolic process	GO:0080090	0.049099	1.30893	GSBRNA2T00085404001,GSBRNA2T00068714001,GSBRNA2T00124863001,GSBRNA2T00014080001,GSBRNA2T00098554001,GSBRNA2T00090639001,GSBRNA2T00149587001,GSBRNA2T00097410001,GSBRNA2T00036858001,GSBRNA2T00065055001,GSBRNA2T00157484001,GSBRNA2T00097409001,GSBRNA2T00048645001,GSBRNA2T00014742001,GSBRNA2T00019791001,GSBRNA2T00021236001,GSBRNA2T00084186001,GSBRNA2T00137481001,GSBRNA2T00075271001,GSBRNA2T00055665001…

## Sheet: 11d
source	name	term_id	adjusted_p_value	-log10(adjPval)	Genes
Biological process	protein phosphorylation	GO:0006468	5.74373e-48	47.2408	GSBRNA2T00126717001,GSBRNA2T00065972001,GSBRNA2T00067501001,GSBRNA2T00131588001,GSBRNA2T00157100001,GSBRNA2T00136890001,GSBRNA2T00072668001,GSBRNA2T00016155001,GSBRNA2T00154963001,GSBRNA2T00043132001,GSBRNA2T00072664001,GSBRNA2T00157106001,GSBRNA2T00157107001,GSBRNA2T00043131001,GSBRNA2T00078964001,GSBRNA2T00136175001,GSBRNA2T00094509001,GSBRNA2T00112290001,GSBRNA2T00124463001,GSBRNA2T00072666001…
Biological process	phosphorylation	GO:0016310	2.60099e-45	44.5849	GSBRNA2T00126717001,GSBRNA2T00065972001,GSBRNA2T00067501001,GSBRNA2T00131588001,GSBRNA2T00157100001,GSBRNA2T00136890001,GSBRNA2T00072668001,GSBRNA2T00016155001,GSBRNA2T00154963001,GSBRNA2T00043132001,GSBRNA2T00072664001,GSBRNA2T00157106001,GSBRNA2T00157107001,GSBRNA2T00043131001,GSBRNA2T00078964001,GSBRNA2T00136175001,GSBRNA2T00094509001,GSBRNA2T00112290001,GSBRNA2T00124463001,GSBRNA2T00072666001…
Biological process	protein autophosphorylation	GO:0046777	8.64476e-41	40.0632	GSBRNA2T00067501001,GSBRNA2T00072668001,GSBRNA2T00072664001,GSBRNA2T00078964001,GSBRNA2T00094509001,GSBRNA2T00124463001,GSBRNA2T00072666001,GSBRNA2T00034205001,GSBRNA2T00011634001,GSBRNA2T00079857001,GSBRNA2T00028825001,GSBRNA2T00096206001,GSBRNA2T00004573001,GSBRNA2T00072942001,GSBRNA2T00062501001,GSBRNA2T00037741001,GSBRNA2T00048742001,GSBRNA2T00094506001,GSBRNA2T00048766001,GSBRNA2T00048835001…
Biological process	phosphate-containing compound metabolic process	GO:0006796	1.22181e-30	29.913	GSBRNA2T00126717001,GSBRNA2T00065972001,GSBRNA2T00067501001,GSBRNA2T00131588001,GSBRNA2T00157100001,GSBRNA2T00136890001,GSBRNA2T00072668001,GSBRNA2T00016155001,GSBRNA2T00154963001,GSBRNA2T00043132001,GSBRNA2T00072664001,GSBRNA2T00157106001,GSBRNA2T00157107001,GSBRNA2T00043131001,GSBRNA2T00078964001,GSBRNA2T00136175001,GSBRNA2T00094509001,GSBRNA2T00112290001,GSBRNA2T00124463001,GSBRNA2T00072666001…
Biological process	phosphorus metabolic process	GO:0006793	2.87534e-30	29.5413	GSBRNA2T00126717001,GSBRNA2T00065972001,GSBRNA2T00067501001,GSBRNA2T00131588001,GSBRNA2T00157100001,GSBRNA2T00136890001,GSBRNA2T00072668001,GSBRNA2T00016155001,GSBRNA2T00154963001,GSBRNA2T00043132001,GSBRNA2T00072664001,GSBRNA2T00157106001,GSBRNA2T00157107001,GSBRNA2T00043131001,GSBRNA2T00078964001,GSBRNA2T00136175001,GSBRNA2T00094509001,GSBRNA2T00112290001,GSBRNA2T00124463001,GSBRNA2T00072666001…
Biological process	protein modification process	GO:0036211	1.79179e-18	17.7467	GSBRNA2T00126717001,GSBRNA2T00025147001,GSBRNA2T00065972001,GSBRNA2T00067501001,GSBRNA2T00131588001,GSBRNA2T00031973001,GSBRNA2T00139014001,GSBRNA2T00157100001,GSBRNA2T00136890001,GSBRNA2T00072668001,GSBRNA2T00016155001,GSBRNA2T00154963001,GSBRNA2T00043132001,GSBRNA2T00072664001,GSBRNA2T00157106001,GSBRNA2T00157107001,GSBRNA2T00043131001,GSBRNA2T00078964001,GSBRNA2T00136175001,GSBRNA2T00094509001…
Biological process	cellular protein modification process	GO:0006464	1.79179e-18	17.7467	GSBRNA2T00126717001,GSBRNA2T00025147001,GSBRNA2T00065972001,GSBRNA2T00067501001,GSBRNA2T00131588001,GSBRNA2T00031973001,GSBRNA2T00139014001,GSBRNA2T00157100001,GSBRNA2T00136890001,GSBRNA2T00072668001,GSBRNA2T00016155001,GSBRNA2T00154963001,GSBRNA2T00043132001,GSBRNA2T00072664001,GSBRNA2T00157106001,GSBRNA2T00157107001,GSBRNA2T00043131001,GSBRNA2T00078964001,GSBRNA2T00136175001,GSBRNA2T00094509001…
Biological process	systemic acquired resistance	GO:0009627	1.40532e-16	15.8522	GSBRNA2T00052436001,GSBRNA2T00041671001,GSBRNA2T00086156001,GSBRNA2T00078004001,GSBRNA2T00117885001,GSBRNA2T00030764001,GSBRNA2T00012995001,GSBRNA2T00009711001,GSBRNA2T00060850001,GSBRNA2T00077487001,GSBRNA2T00150459001,GSBRNA2T00013453001,GSBRNA2T00068342001,GSBRNA2T00085441001,GSBRNA2T00122713001,GSBRNA2T00090460001,GSBRNA2T00108378001,GSBRNA2T00139219001,GSBRNA2T00039476001,GSBRNA2T00095425001…
Biological process	defense response	GO:0006952	7.60901e-15	14.1187	GSBRNA2T00087396001,GSBRNA2T00083918001,GSBRNA2T00022510001,GSBRNA2T00035567001,GSBRNA2T00008668001,GSBRNA2T00000028001,GSBRNA2T00072346001,GSBRNA2T00151456001,GSBRNA2T00035570001,GSBRNA2T00155060001,GSBRNA2T00113459001,GSBRNA2T00056878001,GSBRNA2T00007063001,GSBRNA2T00079053001,GSBRNA2T00025057001,GSBRNA2T00038482001,GSBRNA2T00071552001,GSBRNA2T00017772001,GSBRNA2T00035090001,GSBRNA2T00052436001…
Biological process	macromolecule modification	GO:0043412	2.09142e-14	13.6796	GSBRNA2T00126717001,GSBRNA2T00025147001,GSBRNA2T00065972001,GSBRNA2T00067501001,GSBRNA2T00131588001,GSBRNA2T00031973001,GSBRNA2T00139014001,GSBRNA2T00157100001,GSBRNA2T00136890001,GSBRNA2T00072668001,GSBRNA2T00016155001,GSBRNA2T00154963001,GSBRNA2T00043132001,GSBRNA2T00072664001,GSBRNA2T00157106001,GSBRNA2T00157107001,GSBRNA2T00043131001,GSBRNA2T00078964001,GSBRNA2T00136175001,GSBRNA2T00094509001…
Biological process	glucosamine-containing compound catabolic process	GO:1901072	3.72922e-13	12.4284	GSBRNA2T00085431001,GSBRNA2T00048186001,GSBRNA2T00024824001,GSBRNA2T00132371001,GSBRNA2T00045121001,GSBRNA2T00079736001,GSBRNA2T00150474001,GSBRNA2T00139059001,GSBRNA2T00021983001,GSBRNA2T00139058001,GSBRNA2T00050295001,GSBRNA2T00132651001,GSBRNA2T00036077001,GSBRNA2T00132649001,GSBRNA2T00108995001,GSBRNA2T00079740001,GSBRNA2T00073427001,GSBRNA2T00123467001,GSBRNA2T00025603001,GSBRNA2T00025836001…
Biological process	chitin catabolic process	GO:0006032	3.72922e-13	12.4284	GSBRNA2T00085431001,GSBRNA2T00048186001,GSBRNA2T00024824001,GSBRNA2T00132371001,GSBRNA2T00045121001,GSBRNA2T00079736001,GSBRNA2T00150474001,GSBRNA2T00139059001,GSBRNA2T00021983001,GSBRNA2T00139058001,GSBRNA2T00050295001,GSBRNA2T00132651001,GSBRNA2T00036077001,GSBRNA2T00132649001,GSBRNA2T00108995001,GSBRNA2T00079740001,GSBRNA2T00073427001,GSBRNA2T00123467001,GSBRNA2T00025603001,GSBRNA2T00025836001…
Biological process	chitin metabolic process	GO:0006030	3.72922e-13	12.4284	GSBRNA2T00085431001,GSBRNA2T00048186001,GSBRNA2T00024824001,GSBRNA2T00132371001,GSBRNA2T00045121001,GSBRNA2T00079736001,GSBRNA2T00150474001,GSBRNA2T00139059001,GSBRNA2T00021983001,GSBRNA2T00139058001,GSBRNA2T00050295001,GSBRNA2T00132651001,GSBRNA2T00036077001,GSBRNA2T00132649001,GSBRNA2T00108995001,GSBRNA2T00079740001,GSBRNA2T00073427001,GSBRNA2T00123467001,GSBRNA2T00025603001,GSBRNA2T00025836001…
Biological process	amino sugar catabolic process	GO:0046348	3.72922e-13	12.4284	GSBRNA2T00085431001,GSBRNA2T00048186001,GSBRNA2T00024824001,GSBRNA2T00132371001,GSBRNA2T00045121001,GSBRNA2T00079736001,GSBRNA2T00150474001,GSBRNA2T00139059001,GSBRNA2T00021983001,GSBRNA2T00139058001,GSBRNA2T00050295001,GSBRNA2T00132651001,GSBRNA2T00036077001,GSBRNA2T00132649001,GSBRNA2T00108995001,GSBRNA2T00079740001,GSBRNA2T00073427001,GSBRNA2T00123467001,GSBRNA2T00025603001,GSBRNA2T00025836001…
Biological process	aminoglycan catabolic process	GO:0006026	3.72922e-13	12.4284	GSBRNA2T00085431001,GSBRNA2T00048186001,GSBRNA2T00024824001,GSBRNA2T00132371001,GSBRNA2T00045121001,GSBRNA2T00079736001,GSBRNA2T00150474001,GSBRNA2T00139059001,GSBRNA2T00021983001,GSBRNA2T00139058001,GSBRNA2T00050295001,GSBRNA2T00132651001,GSBRNA2T00036077001,GSBRNA2T00132649001,GSBRNA2T00108995001,GSBRNA2T00079740001,GSBRNA2T00073427001,GSBRNA2T00123467001,GSBRNA2T00025603001,GSBRNA2T00025836001…
Biological process	cell wall macromolecule catabolic process	GO:0016998	5.67868e-13	12.2458	GSBRNA2T00085431001,GSBRNA2T00048186001,GSBRNA2T00024824001,GSBRNA2T00132371001,GSBRNA2T00045121001,GSBRNA2T00079736001,GSBRNA2T00150474001,GSBRNA2T00139059001,GSBRNA2T00021983001,GSBRNA2T00139058001,GSBRNA2T00050295001,GSBRNA2T00132651001,GSBRNA2T00036077001,GSBRNA2T00132649001,GSBRNA2T00108995001,GSBRNA2T00079740001,GSBRNA2T00073427001,GSBRNA2T00123467001,GSBRNA2T00025836001,GSBRNA2T00139050001…
Biological process	aminoglycan metabolic process	GO:0006022	1.37686e-12	11.8611	GSBRNA2T00085431001,GSBRNA2T00048186001,GSBRNA2T00024824001,GSBRNA2T00132371001,GSBRNA2T00045121001,GSBRNA2T00079736001,GSBRNA2T00150474001,GSBRNA2T00139059001,GSBRNA2T00021983001,GSBRNA2T00139058001,GSBRNA2T00050295001,GSBRNA2T00132651001,GSBRNA2T00036077001,GSBRNA2T00132649001,GSBRNA2T00108995001,GSBRNA2T00079740001,GSBRNA2T00073427001,GSBRNA2T00123467001,GSBRNA2T00025603001,GSBRNA2T00025836001…
Biological process	glucosamine-containing compound metabolic process	GO:1901071	5.51521e-11	10.2584	GSBRNA2T00085431001,GSBRNA2T00048186001,GSBRNA2T00024824001,GSBRNA2T00132371001,GSBRNA2T00045121001,GSBRNA2T00079736001,GSBRNA2T00150474001,GSBRNA2T00139059001,GSBRNA2T00021983001,GSBRNA2T00139058001,GSBRNA2T00050295001,GSBRNA2T00132651001,GSBRNA2T00036077001,GSBRNA2T00132649001,GSBRNA2T00108995001,GSBRNA2T00079740001,GSBRNA2T00073427001,GSBRNA2T00123467001,GSBRNA2T00025603001,GSBRNA2T00025836001…
Biological process	glutathione metabolic process	GO:0006749	8.3861e-11	10.0764	GSBRNA2T00018596001,GSBRNA2T00027617001,GSBRNA2T00022179001,GSBRNA2T00002404001,GSBRNA2T00151674001,GSBRNA2T00049769001,GSBRNA2T00104311001,GSBRNA2T00082067001,GSBRNA2T00046820001,GSBRNA2T00002403001,GSBRNA2T00151673001,GSBRNA2T00049770001,GSBRNA2T00067869001,GSBRNA2T00096592001,GSBRNA2T00034941001,GSBRNA2T00136749001,GSBRNA2T00018439001,GSBRNA2T00119582001,GSBRNA2T00066571001,GSBRNA2T00091168001…
Biological process	response to biotic stimulus	GO:0009607	7.36522e-10	9.13281	GSBRNA2T00087396001,GSBRNA2T00083918001,GSBRNA2T00022510001,GSBRNA2T00151456001,GSBRNA2T00113459001,GSBRNA2T00007063001,GSBRNA2T00079053001,GSBRNA2T00025057001,GSBRNA2T00071552001,GSBRNA2T00017772001,GSBRNA2T00035090001,GSBRNA2T00052436001,GSBRNA2T00041671001,GSBRNA2T00086156001,GSBRNA2T00111932001,GSBRNA2T00047880001,GSBRNA2T00078004001,GSBRNA2T00117885001,GSBRNA2T00030764001,GSBRNA2T00012995001…
Biological process	regulation of systemic acquired resistance	GO:0010112	9.55876e-10	9.0196	GSBRNA2T00052436001,GSBRNA2T00041671001,GSBRNA2T00078004001,GSBRNA2T00117885001,GSBRNA2T00030764001,GSBRNA2T00150459001,GSBRNA2T00085441001,GSBRNA2T00108378001,GSBRNA2T00139219001,GSBRNA2T00072247001,GSBRNA2T00112220001
Biological process	defense response to other organism	GO:0098542	2.00574e-09	8.69773	GSBRNA2T00087396001,GSBRNA2T00083918001,GSBRNA2T00022510001,GSBRNA2T00151456001,GSBRNA2T00113459001,GSBRNA2T00007063001,GSBRNA2T00071552001,GSBRNA2T00017772001,GSBRNA2T00052436001,GSBRNA2T00041671001,GSBRNA2T00086156001,GSBRNA2T00111932001,GSBRNA2T00047880001,GSBRNA2T00078004001,GSBRNA2T00117885001,GSBRNA2T00030764001,GSBRNA2T00012995001,GSBRNA2T00009711001,GSBRNA2T00060850001,GSBRNA2T00077487001…
Biological process	immune response	GO:0006955	2.00574e-09	8.69773	GSBRNA2T00087396001,GSBRNA2T00083918001,GSBRNA2T00022510001,GSBRNA2T00151456001,GSBRNA2T00113459001,GSBRNA2T00007063001,GSBRNA2T00071552001,GSBRNA2T00017772001,GSBRNA2T00052436001,GSBRNA2T00041671001,GSBRNA2T00086156001,GSBRNA2T00111932001,GSBRNA2T00047880001,GSBRNA2T00078004001,GSBRNA2T00117885001,GSBRNA2T00030764001,GSBRNA2T00012995001,GSBRNA2T00009711001,GSBRNA2T00060850001,GSBRNA2T00077487001…
Biological process	immune system process	GO:0002376	2.00574e-09	8.69773	GSBRNA2T00087396001,GSBRNA2T00083918001,GSBRNA2T00022510001,GSBRNA2T00151456001,GSBRNA2T00113459001,GSBRNA2T00007063001,GSBRNA2T00071552001,GSBRNA2T00017772001,GSBRNA2T00052436001,GSBRNA2T00041671001,GSBRNA2T00086156001,GSBRNA2T00111932001,GSBRNA2T00047880001,GSBRNA2T00078004001,GSBRNA2T00117885001,GSBRNA2T00030764001,GSBRNA2T00012995001,GSBRNA2T00009711001,GSBRNA2T00060850001,GSBRNA2T00077487001…
Biological process	response to external biotic stimulus	GO:0043207	3.39442e-09	8.46923	GSBRNA2T00087396001,GSBRNA2T00083918001,GSBRNA2T00022510001,GSBRNA2T00151456001,GSBRNA2T00113459001,GSBRNA2T00007063001,GSBRNA2T00071552001,GSBRNA2T00017772001,GSBRNA2T00052436001,GSBRNA2T00041671001,GSBRNA2T00086156001,GSBRNA2T00111932001,GSBRNA2T00047880001,GSBRNA2T00078004001,GSBRNA2T00117885001,GSBRNA2T00030764001,GSBRNA2T00012995001,GSBRNA2T00009711001,GSBRNA2T00060850001,GSBRNA2T00077487001…
Biological process	response to other organism	GO:0051707	3.39442e-09	8.46923	GSBRNA2T00087396001,GSBRNA2T00083918001,GSBRNA2T00022510001,GSBRNA2T00151456001,GSBRNA2T00113459001,GSBRNA2T00007063001,GSBRNA2T00071552001,GSBRNA2T00017772001,GSBRNA2T00052436001,GSBRNA2T00041671001,GSBRNA2T00086156001,GSBRNA2T00111932001,GSBRNA2T00047880001,GSBRNA2T00078004001,GSBRNA2T00117885001,GSBRNA2T00030764001,GSBRNA2T00012995001,GSBRNA2T00009711001,GSBRNA2T00060850001,GSBRNA2T00077487001…
Biological process	biological process involved in interspecies interaction between organisms	GO:0044419	4.15985e-09	8.38092	GSBRNA2T00087396001,GSBRNA2T00083918001,GSBRNA2T00022510001,GSBRNA2T00151456001,GSBRNA2T00113459001,GSBRNA2T00007063001,GSBRNA2T00071552001,GSBRNA2T00017772001,GSBRNA2T00052436001,GSBRNA2T00041671001,GSBRNA2T00086156001,GSBRNA2T00111932001,GSBRNA2T00047880001,GSBRNA2T00078004001,GSBRNA2T00143754001,GSBRNA2T00117885001,GSBRNA2T00030764001,GSBRNA2T00012995001,GSBRNA2T00009711001,GSBRNA2T00060850001…
Biological process	amino sugar metabolic process	GO:0006040	4.8758e-09	8.31195	GSBRNA2T00085431001,GSBRNA2T00048186001,GSBRNA2T00024824001,GSBRNA2T00132371001,GSBRNA2T00045121001,GSBRNA2T00079736001,GSBRNA2T00150474001,GSBRNA2T00139059001,GSBRNA2T00021983001,GSBRNA2T00139058001,GSBRNA2T00050295001,GSBRNA2T00132651001,GSBRNA2T00036077001,GSBRNA2T00132649001,GSBRNA2T00108995001,GSBRNA2T00079740001,GSBRNA2T00073427001,GSBRNA2T00123467001,GSBRNA2T00025603001,GSBRNA2T00025836001…
Biological process	sulfur compound metabolic process	GO:0006790	7.38531e-08	7.13163	GSBRNA2T00018596001,GSBRNA2T00027617001,GSBRNA2T00075176001,GSBRNA2T00068760001,GSBRNA2T00022179001,GSBRNA2T00002404001,GSBRNA2T00151674001,GSBRNA2T00049769001,GSBRNA2T00104311001,GSBRNA2T00082067001,GSBRNA2T00046820001,GSBRNA2T00002403001,GSBRNA2T00151673001,GSBRNA2T00023076001,GSBRNA2T00087922001,GSBRNA2T00049770001,GSBRNA2T00067869001,GSBRNA2T00096592001,GSBRNA2T00002171001,GSBRNA2T00034941001…
Biological process	cellular modified amino acid metabolic process	GO:0006575	8.06843e-08	7.09321	GSBRNA2T00018596001,GSBRNA2T00027617001,GSBRNA2T00022179001,GSBRNA2T00002404001,GSBRNA2T00151674001,GSBRNA2T00049769001,GSBRNA2T00104311001,GSBRNA2T00082067001,GSBRNA2T00046820001,GSBRNA2T00002403001,GSBRNA2T00151673001,GSBRNA2T00049770001,GSBRNA2T00067869001,GSBRNA2T00096592001,GSBRNA2T00034941001,GSBRNA2T00136749001,GSBRNA2T00018439001,GSBRNA2T00119582001,GSBRNA2T00066571001,GSBRNA2T00091168001…
Biological process	response to external stimulus	GO:0009605	2.15874e-07	6.6658	GSBRNA2T00087396001,GSBRNA2T00083918001,GSBRNA2T00022510001,GSBRNA2T00151456001,GSBRNA2T00113459001,GSBRNA2T00016532001,GSBRNA2T00055202001,GSBRNA2T00007063001,GSBRNA2T00017654001,GSBRNA2T00038175001,GSBRNA2T00071552001,GSBRNA2T00090553001,GSBRNA2T00017772001,GSBRNA2T00052436001,GSBRNA2T00041671001,GSBRNA2T00067777001,GSBRNA2T00086156001,GSBRNA2T00111932001,GSBRNA2T00047880001,GSBRNA2T00078004001…
Biological process	carbohydrate derivative catabolic process	GO:1901136	7.07739e-07	6.15013	GSBRNA2T00075176001,GSBRNA2T00085431001,GSBRNA2T00048186001,GSBRNA2T00024824001,GSBRNA2T00132371001,GSBRNA2T00045121001,GSBRNA2T00023076001,GSBRNA2T00087922001,GSBRNA2T00079736001,GSBRNA2T00150474001,GSBRNA2T00139059001,GSBRNA2T00021983001,GSBRNA2T00139058001,GSBRNA2T00002171001,GSBRNA2T00050295001,GSBRNA2T00132651001,GSBRNA2T00036077001,GSBRNA2T00132649001,GSBRNA2T00108995001,GSBRNA2T00079740001…
Biological process	response to bacterium	GO:0009617	1.58499e-06	5.79997	GSBRNA2T00087396001,GSBRNA2T00083918001,GSBRNA2T00022510001,GSBRNA2T00151456001,GSBRNA2T00007063001,GSBRNA2T00071552001,GSBRNA2T00111932001,GSBRNA2T00047880001,GSBRNA2T00003508001,GSBRNA2T00071551001,GSBRNA2T00106932001,GSBRNA2T00046971001,GSBRNA2T00000709001,GSBRNA2T00067871001,GSBRNA2T00046482001,GSBRNA2T00096609001,GSBRNA2T00046481001,GSBRNA2T00016777001,GSBRNA2T00156999001,GSBRNA2T00049213001…
Biological process	defense response to bacterium	GO:0042742	4.96795e-06	5.30382	GSBRNA2T00087396001,GSBRNA2T00083918001,GSBRNA2T00022510001,GSBRNA2T00007063001,GSBRNA2T00071552001,GSBRNA2T00111932001,GSBRNA2T00047880001,GSBRNA2T00003508001,GSBRNA2T00071551001,GSBRNA2T00106932001,GSBRNA2T00046971001,GSBRNA2T00000709001,GSBRNA2T00067871001,GSBRNA2T00046482001,GSBRNA2T00096609001,GSBRNA2T00046481001,GSBRNA2T00016777001,GSBRNA2T00156999001,GSBRNA2T00049213001,GSBRNA2T00045998001…
Biological process	small molecule catabolic process	GO:0044282	9.4848e-06	5.02297	GSBRNA2T00030878001,GSBRNA2T00151456001,GSBRNA2T00090129001,GSBRNA2T00019407001,GSBRNA2T00112701001,GSBRNA2T00017092001,GSBRNA2T00043891001,GSBRNA2T00142964001,GSBRNA2T00067884001,GSBRNA2T00099968001,GSBRNA2T00008196001,GSBRNA2T00047527001,GSBRNA2T00077278001,GSBRNA2T00141689001,GSBRNA2T00091375001,GSBRNA2T00063071001,GSBRNA2T00024758001,GSBRNA2T00078572001,GSBRNA2T00012859001,GSBRNA2T00095662001…
Biological process	regulation of immune response	GO:0050776	9.51217e-06	5.02172	GSBRNA2T00052436001,GSBRNA2T00041671001,GSBRNA2T00078004001,GSBRNA2T00117885001,GSBRNA2T00030764001,GSBRNA2T00150459001,GSBRNA2T00085441001,GSBRNA2T00108378001,GSBRNA2T00106932001,GSBRNA2T00139219001,GSBRNA2T00072247001,GSBRNA2T00106920001,GSBRNA2T00156999001,GSBRNA2T00136288001,GSBRNA2T00112220001,GSBRNA2T00134370001,GSBRNA2T00004969001
Biological process	regulation of response to biotic stimulus	GO:0002831	9.51217e-06	5.02172	GSBRNA2T00052436001,GSBRNA2T00041671001,GSBRNA2T00078004001,GSBRNA2T00117885001,GSBRNA2T00030764001,GSBRNA2T00150459001,GSBRNA2T00085441001,GSBRNA2T00108378001,GSBRNA2T00106932001,GSBRNA2T00139219001,GSBRNA2T00072247001,GSBRNA2T00106920001,GSBRNA2T00156999001,GSBRNA2T00136288001,GSBRNA2T00112220001,GSBRNA2T00134370001,GSBRNA2T00004969001
Biological process	regulation of immune system process	GO:0002682	9.51217e-06	5.02172	GSBRNA2T00052436001,GSBRNA2T00041671001,GSBRNA2T00078004001,GSBRNA2T00117885001,GSBRNA2T00030764001,GSBRNA2T00150459001,GSBRNA2T00085441001,GSBRNA2T00108378001,GSBRNA2T00106932001,GSBRNA2T00139219001,GSBRNA2T00072247001,GSBRNA2T00106920001,GSBRNA2T00156999001,GSBRNA2T00136288001,GSBRNA2T00112220001,GSBRNA2T00134370001,GSBRNA2T00004969001
Biological process	regulation of response to external stimulus	GO:0032101	9.51217e-06	5.02172	GSBRNA2T00052436001,GSBRNA2T00041671001,GSBRNA2T00078004001,GSBRNA2T00117885001,GSBRNA2T00030764001,GSBRNA2T00150459001,GSBRNA2T00085441001,GSBRNA2T00108378001,GSBRNA2T00106932001,GSBRNA2T00139219001,GSBRNA2T00072247001,GSBRNA2T00106920001,GSBRNA2T00156999001,GSBRNA2T00136288001,GSBRNA2T00112220001,GSBRNA2T00134370001,GSBRNA2T00004969001
Biological process	recognition of pollen	GO:0048544	3.01976e-05	4.52003	GSBRNA2T00065972001,GSBRNA2T00131588001,GSBRNA2T00078964001,GSBRNA2T00124463001,GSBRNA2T00096206001,GSBRNA2T00057625001,GSBRNA2T00037741001,GSBRNA2T00015141001,GSBRNA2T00067500001,GSBRNA2T00105301001,GSBRNA2T00058352001,GSBRNA2T00124466001,GSBRNA2T00072180001,GSBRNA2T00117283001,GSBRNA2T00092243001,GSBRNA2T00087669001,GSBRNA2T00037742001,GSBRNA2T00105297001,GSBRNA2T00008887001,GSBRNA2T00031197001…
Biological process	cell recognition	GO:0008037	3.26824e-05	4.48569	GSBRNA2T00065972001,GSBRNA2T00131588001,GSBRNA2T00078964001,GSBRNA2T00124463001,GSBRNA2T00096206001,GSBRNA2T00057625001,GSBRNA2T00037741001,GSBRNA2T00015141001,GSBRNA2T00067500001,GSBRNA2T00105301001,GSBRNA2T00058352001,GSBRNA2T00124466001,GSBRNA2T00072180001,GSBRNA2T00117283001,GSBRNA2T00092243001,GSBRNA2T00087669001,GSBRNA2T00037742001,GSBRNA2T00105297001,GSBRNA2T00008887001,GSBRNA2T00031197001…
Biological process	pollen-pistil interaction	GO:0009875	3.9178e-05	4.40696	GSBRNA2T00065972001,GSBRNA2T00131588001,GSBRNA2T00078964001,GSBRNA2T00124463001,GSBRNA2T00096206001,GSBRNA2T00057625001,GSBRNA2T00037741001,GSBRNA2T00015141001,GSBRNA2T00067500001,GSBRNA2T00105301001,GSBRNA2T00058352001,GSBRNA2T00124466001,GSBRNA2T00072180001,GSBRNA2T00117283001,GSBRNA2T00092243001,GSBRNA2T00087669001,GSBRNA2T00037742001,GSBRNA2T00105297001,GSBRNA2T00008887001,GSBRNA2T00031197001…
Biological process	regulation of reductive pentose-phosphate cycle	GO:0080152	6.2811e-05	4.20196	GSBRNA2T00003358001,GSBRNA2T00016785001,GSBRNA2T00038154001,GSBRNA2T00049485001,GSBRNA2T00028976001
Biological process	obsolete oxidation-reduction process	GO:0055114	6.2811e-05	4.20196	GSBRNA2T00002751001,GSBRNA2T00138904001,GSBRNA2T00072332001,GSBRNA2T00035581001,GSBRNA2T00004831001,GSBRNA2T00002750001,GSBRNA2T00104806001,GSBRNA2T00029904001,GSBRNA2T00027343001,GSBRNA2T00090596001,GSBRNA2T00111327001,GSBRNA2T00008945001,GSBRNA2T00077296001,GSBRNA2T00001024001,GSBRNA2T00142450001,GSBRNA2T00027986001,GSBRNA2T00070338001,GSBRNA2T00054421001,GSBRNA2T00057616001,GSBRNA2T00151456001…
Biological process	negative regulation of photosynthesis	GO:1905156	6.2811e-05	4.20196	GSBRNA2T00003358001,GSBRNA2T00016785001,GSBRNA2T00038154001,GSBRNA2T00049485001,GSBRNA2T00028976001
Biological process	pollination	GO:0009856	6.2811e-05	4.20196	GSBRNA2T00065972001,GSBRNA2T00131588001,GSBRNA2T00078964001,GSBRNA2T00124463001,GSBRNA2T00096206001,GSBRNA2T00057625001,GSBRNA2T00037741001,GSBRNA2T00015141001,GSBRNA2T00067500001,GSBRNA2T00105301001,GSBRNA2T00058352001,GSBRNA2T00124466001,GSBRNA2T00072180001,GSBRNA2T00117283001,GSBRNA2T00092243001,GSBRNA2T00087669001,GSBRNA2T00037742001,GSBRNA2T00105297001,GSBRNA2T00008887001,GSBRNA2T00031197001…
Biological process	regulation of photosynthesis, dark reaction	GO:0010110	6.2811e-05	4.20196	GSBRNA2T00003358001,GSBRNA2T00016785001,GSBRNA2T00038154001,GSBRNA2T00049485001,GSBRNA2T00028976001
Biological process	negative regulation of reductive pentose-phosphate cycle	GO:0080153	6.2811e-05	4.20196	GSBRNA2T00003358001,GSBRNA2T00016785001,GSBRNA2T00038154001,GSBRNA2T00049485001,GSBRNA2T00028976001
Biological process	multi-multicellular organism process	GO:0044706	6.2811e-05	4.20196	GSBRNA2T00065972001,GSBRNA2T00131588001,GSBRNA2T00078964001,GSBRNA2T00124463001,GSBRNA2T00096206001,GSBRNA2T00057625001,GSBRNA2T00037741001,GSBRNA2T00015141001,GSBRNA2T00067500001,GSBRNA2T00105301001,GSBRNA2T00058352001,GSBRNA2T00124466001,GSBRNA2T00072180001,GSBRNA2T00117283001,GSBRNA2T00092243001,GSBRNA2T00087669001,GSBRNA2T00037742001,GSBRNA2T00105297001,GSBRNA2T00008887001,GSBRNA2T00031197001…
Biological process	cell wall macromolecule metabolic process	GO:0044036	9.41539e-05	4.02616	GSBRNA2T00085431001,GSBRNA2T00048186001,GSBRNA2T00024824001,GSBRNA2T00132371001,GSBRNA2T00045121001,GSBRNA2T00107727001,GSBRNA2T00079736001,GSBRNA2T00150474001,GSBRNA2T00139059001,GSBRNA2T00021983001,GSBRNA2T00139058001,GSBRNA2T00055196001,GSBRNA2T00050295001,GSBRNA2T00132651001,GSBRNA2T00036077001,GSBRNA2T00132649001,GSBRNA2T00108995001,GSBRNA2T00079740001,GSBRNA2T00018372001,GSBRNA2T00073427001…
Biological process	regulation of defense response	GO:0031347	0.000120224	3.92001	GSBRNA2T00052436001,GSBRNA2T00041671001,GSBRNA2T00078004001,GSBRNA2T00117885001,GSBRNA2T00030764001,GSBRNA2T00150459001,GSBRNA2T00085441001,GSBRNA2T00072318001,GSBRNA2T00108378001,GSBRNA2T00106932001,GSBRNA2T00139219001,GSBRNA2T00072247001,GSBRNA2T00106920001,GSBRNA2T00035595001,GSBRNA2T00156999001,GSBRNA2T00136288001,GSBRNA2T00011092001,GSBRNA2T00112220001,GSBRNA2T00028451001,GSBRNA2T00020988001…
Biological process	lipid transport	GO:0006869	0.000205637	3.6869	GSBRNA2T00069516001,GSBRNA2T00032396001,GSBRNA2T00108427001,GSBRNA2T00035511001,GSBRNA2T00090477001,GSBRNA2T00102035001,GSBRNA2T00066288001,GSBRNA2T00098298001,GSBRNA2T00084107001,GSBRNA2T00012648001,GSBRNA2T00058485001,GSBRNA2T00136303001,GSBRNA2T00106897001,GSBRNA2T00123995001,GSBRNA2T00103362001,GSBRNA2T00027223001,GSBRNA2T00053271001,GSBRNA2T00018767001,GSBRNA2T00063072001,GSBRNA2T00024762001…
Biological process	transmembrane transport	GO:0055085	0.000218724	3.6601	GSBRNA2T00087846001,GSBRNA2T00116222001,GSBRNA2T00064897001,GSBRNA2T00002433001,GSBRNA2T00078853001,GSBRNA2T00023649001,GSBRNA2T00096243001,GSBRNA2T00072992001,GSBRNA2T00016532001,GSBRNA2T00123950001,GSBRNA2T00009760001,GSBRNA2T00055202001,GSBRNA2T00085231001,GSBRNA2T00069480001,GSBRNA2T00017654001,GSBRNA2T00137724001,GSBRNA2T00068067001,GSBRNA2T00129939001,GSBRNA2T00156728001,GSBRNA2T00136789001…
Biological process	response to stress	GO:0006950	0.000218724	3.6601	GSBRNA2T00087396001,GSBRNA2T00083918001,GSBRNA2T00022510001,GSBRNA2T00075176001,GSBRNA2T00035567001,GSBRNA2T00077296001,GSBRNA2T00008668001,GSBRNA2T00054421001,GSBRNA2T00000028001,GSBRNA2T00072346001,GSBRNA2T00151456001,GSBRNA2T00035570001,GSBRNA2T00155060001,GSBRNA2T00113459001,GSBRNA2T00016532001,GSBRNA2T00055202001,GSBRNA2T00056878001,GSBRNA2T00123829001,GSBRNA2T00023076001,GSBRNA2T00106935001…
Biological process	cell surface receptor signaling pathway	GO:0007166	0.000223622	3.65048	GSBRNA2T00016155001,GSBRNA2T00043132001,GSBRNA2T00043131001,GSBRNA2T00007063001,GSBRNA2T00047880001,GSBRNA2T00037909001,GSBRNA2T00003508001,GSBRNA2T00042780001,GSBRNA2T00046971001,GSBRNA2T00000709001,GSBRNA2T00024797001,GSBRNA2T00046482001,GSBRNA2T00096609001,GSBRNA2T00042785001,GSBRNA2T00046481001,GSBRNA2T00043133001,GSBRNA2T00042786001,GSBRNA2T00016777001,GSBRNA2T00049213001,GSBRNA2T00094461001…
Biological process	phospholipid transport	GO:0015914	0.000223622	3.65048	GSBRNA2T00108427001,GSBRNA2T00035511001,GSBRNA2T00090477001,GSBRNA2T00066288001,GSBRNA2T00098298001,GSBRNA2T00084107001,GSBRNA2T00012648001,GSBRNA2T00058485001,GSBRNA2T00136303001,GSBRNA2T00106897001,GSBRNA2T00103362001,GSBRNA2T00027223001,GSBRNA2T00018767001,GSBRNA2T00158212001,GSBRNA2T00080139001,GSBRNA2T00117977001,GSBRNA2T00037931001
Biological process	organophosphate ester transport	GO:0015748	0.000415712	3.38121	GSBRNA2T00108427001,GSBRNA2T00035511001,GSBRNA2T00090477001,GSBRNA2T00066288001,GSBRNA2T00098298001,GSBRNA2T00084107001,GSBRNA2T00012648001,GSBRNA2T00058485001,GSBRNA2T00136303001,GSBRNA2T00106897001,GSBRNA2T00103362001,GSBRNA2T00027223001,GSBRNA2T00018767001,GSBRNA2T00158212001,GSBRNA2T00022568001,GSBRNA2T00068880001,GSBRNA2T00151902001,GSBRNA2T00080139001,GSBRNA2T00103075001,GSBRNA2T00139757001…
Biological process	xenobiotic transport	GO:0042908	0.000419187	3.37759	GSBRNA2T00096243001,GSBRNA2T00085231001,GSBRNA2T00020001001,GSBRNA2T00093137001,GSBRNA2T00016242001,GSBRNA2T00008659001,GSBRNA2T00073946001,GSBRNA2T00096241001,GSBRNA2T00075105001,GSBRNA2T00064711001,GSBRNA2T00026389001,GSBRNA2T00002624001,GSBRNA2T00026391001,GSBRNA2T00066740001,GSBRNA2T00067997001,GSBRNA2T00018547001,GSBRNA2T00006634001,GSBRNA2T00033906001,GSBRNA2T00000741001,GSBRNA2T00043379001…
Biological process	positive regulation of DNA-binding transcription factor activity	GO:0051091	0.00118076	2.92784	GSBRNA2T00126228001,GSBRNA2T00050878001,GSBRNA2T00126230001,GSBRNA2T00076523001,GSBRNA2T00058422001,GSBRNA2T00155923001
Biological process	organonitrogen compound metabolic process	GO:1901564	0.00118076	2.92784	GSBRNA2T00030878001,GSBRNA2T00018596001,GSBRNA2T00126717001,GSBRNA2T00025147001,GSBRNA2T00027617001,GSBRNA2T00065972001,GSBRNA2T00075176001,GSBRNA2T00057289001,GSBRNA2T00022179001,GSBRNA2T00085431001,GSBRNA2T00067501001,GSBRNA2T00131588001,GSBRNA2T00031973001,GSBRNA2T00139014001,GSBRNA2T00157100001,GSBRNA2T00136890001,GSBRNA2T00072668001,GSBRNA2T00016155001,GSBRNA2T00154963001,GSBRNA2T00002404001…
Biological process	phosphate ion transport	GO:0006817	0.00118076	2.92784	GSBRNA2T00064897001,GSBRNA2T00016532001,GSBRNA2T00055202001,GSBRNA2T00017654001,GSBRNA2T00116869001,GSBRNA2T00116867001,GSBRNA2T00090553001,GSBRNA2T00067777001,GSBRNA2T00005340001,GSBRNA2T00155254001,GSBRNA2T00017656001,GSBRNA2T00031583001,GSBRNA2T00030203001,GSBRNA2T00135625001,GSBRNA2T00081597001
Biological process	response to toxic substance	GO:0009636	0.00128684	2.89048	GSBRNA2T00077296001,GSBRNA2T00002404001,GSBRNA2T00054421001,GSBRNA2T00046820001,GSBRNA2T00002403001,GSBRNA2T00064141001,GSBRNA2T00074552001,GSBRNA2T00096592001,GSBRNA2T00092271001,GSBRNA2T00018439001,GSBRNA2T00047517001,GSBRNA2T00013915001,GSBRNA2T00043891001,GSBRNA2T00136178001,GSBRNA2T00084825001,GSBRNA2T00068642001,GSBRNA2T00067884001,GSBRNA2T00094622001,GSBRNA2T00043868001,GSBRNA2T00027608001…
Biological process	proline metabolic process	GO:0006560	0.00149713	2.82474	GSBRNA2T00112701001,GSBRNA2T00017092001,GSBRNA2T00142964001,GSBRNA2T00008196001,GSBRNA2T00069393001,GSBRNA2T00033737001,GSBRNA2T00116809001,GSBRNA2T00155189001,GSBRNA2T00012577001,GSBRNA2T00123351001
Biological process	lipid localization	GO:0010876	0.00222075	2.6535	GSBRNA2T00069516001,GSBRNA2T00032396001,GSBRNA2T00108427001,GSBRNA2T00035511001,GSBRNA2T00090477001,GSBRNA2T00102035001,GSBRNA2T00066288001,GSBRNA2T00098298001,GSBRNA2T00084107001,GSBRNA2T00012648001,GSBRNA2T00058485001,GSBRNA2T00136303001,GSBRNA2T00106897001,GSBRNA2T00123995001,GSBRNA2T00103362001,GSBRNA2T00027223001,GSBRNA2T00053271001,GSBRNA2T00018767001,GSBRNA2T00063072001,GSBRNA2T00024762001…
Biological process	cell communication	GO:0007154	0.00223221	2.65127	GSBRNA2T00065972001,GSBRNA2T00131588001,GSBRNA2T00016155001,GSBRNA2T00155030001,GSBRNA2T00000028001,GSBRNA2T00043132001,GSBRNA2T00043131001,GSBRNA2T00078964001,GSBRNA2T00124463001,GSBRNA2T00016532001,GSBRNA2T00055202001,GSBRNA2T00056878001,GSBRNA2T00007063001,GSBRNA2T00017654001,GSBRNA2T00096206001,GSBRNA2T00057625001,GSBRNA2T00038175001,GSBRNA2T00038482001,GSBRNA2T00037741001,GSBRNA2T00090553001…
Biological process	enzyme linked receptor protein signaling pathway	GO:0007167	0.00230386	2.63754	GSBRNA2T00007063001,GSBRNA2T00047880001,GSBRNA2T00003508001,GSBRNA2T00046971001,GSBRNA2T00000709001,GSBRNA2T00046482001,GSBRNA2T00096609001,GSBRNA2T00046481001,GSBRNA2T00016777001,GSBRNA2T00049213001,GSBRNA2T00094461001,GSBRNA2T00002415001,GSBRNA2T00018576001,GSBRNA2T00124905001,GSBRNA2T00089499001,GSBRNA2T00024985001,GSBRNA2T00018425001,GSBRNA2T00081297001
Biological process	transmembrane receptor protein serine/threonine kinase signaling pathway	GO:0007178	0.00230386	2.63754	GSBRNA2T00007063001,GSBRNA2T00047880001,GSBRNA2T00003508001,GSBRNA2T00046971001,GSBRNA2T00000709001,GSBRNA2T00046482001,GSBRNA2T00096609001,GSBRNA2T00046481001,GSBRNA2T00016777001,GSBRNA2T00049213001,GSBRNA2T00094461001,GSBRNA2T00002415001,GSBRNA2T00018576001,GSBRNA2T00124905001,GSBRNA2T00089499001,GSBRNA2T00024985001,GSBRNA2T00018425001,GSBRNA2T00081297001
Biological process	response to oxygen-containing compound	GO:1901700	0.00309647	2.50913	GSBRNA2T00151456001,GSBRNA2T00038175001,GSBRNA2T00062162001,GSBRNA2T00057044001,GSBRNA2T00000642001,GSBRNA2T00076879001,GSBRNA2T00072318001,GSBRNA2T00043891001,GSBRNA2T00078688001,GSBRNA2T00014080001,GSBRNA2T00106932001,GSBRNA2T00067871001,GSBRNA2T00015198001,GSBRNA2T00008105001,GSBRNA2T00074154001,GSBRNA2T00028695001,GSBRNA2T00015754001,GSBRNA2T00067884001,GSBRNA2T00035595001,GSBRNA2T00047387001…
Biological process	carboxylic acid catabolic process	GO:0046395	0.00321014	2.49348	GSBRNA2T00030878001,GSBRNA2T00151456001,GSBRNA2T00090129001,GSBRNA2T00019407001,GSBRNA2T00112701001,GSBRNA2T00017092001,GSBRNA2T00142964001,GSBRNA2T00099968001,GSBRNA2T00008196001,GSBRNA2T00091375001,GSBRNA2T00078572001,GSBRNA2T00095662001,GSBRNA2T00000782001,GSBRNA2T00062544001,GSBRNA2T00126668001,GSBRNA2T00126538001,GSBRNA2T00060868001,GSBRNA2T00095389001,GSBRNA2T00022306001,GSBRNA2T00013025001…
Biological process	regulation of DNA-binding transcription factor activity	GO:0051090	0.00336451	2.47308	GSBRNA2T00126228001,GSBRNA2T00050878001,GSBRNA2T00126230001,GSBRNA2T00076523001,GSBRNA2T00058422001,GSBRNA2T00155923001
Biological process	response to hydrogen peroxide	GO:0042542	0.00344909	2.4623	GSBRNA2T00106932001,GSBRNA2T00050618001,GSBRNA2T00069948001,GSBRNA2T00082070001,GSBRNA2T00010517001,GSBRNA2T00010518001,GSBRNA2T00029992001,GSBRNA2T00003270001,GSBRNA2T00033887001
Biological process	organic acid catabolic process	GO:0016054	0.00344909	2.4623	GSBRNA2T00030878001,GSBRNA2T00151456001,GSBRNA2T00090129001,GSBRNA2T00019407001,GSBRNA2T00112701001,GSBRNA2T00017092001,GSBRNA2T00142964001,GSBRNA2T00099968001,GSBRNA2T00008196001,GSBRNA2T00091375001,GSBRNA2T00078572001,GSBRNA2T00095662001,GSBRNA2T00000782001,GSBRNA2T00062544001,GSBRNA2T00126668001,GSBRNA2T00126538001,GSBRNA2T00060868001,GSBRNA2T00095389001,GSBRNA2T00022306001,GSBRNA2T00013025001…
Biological process	defense response to oomycetes	GO:0002229	0.00400487	2.39741	GSBRNA2T00151456001,GSBRNA2T00007063001,GSBRNA2T00047880001,GSBRNA2T00003508001,GSBRNA2T00046971001,GSBRNA2T00000709001,GSBRNA2T00046482001,GSBRNA2T00096609001,GSBRNA2T00046481001,GSBRNA2T00016777001,GSBRNA2T00049213001,GSBRNA2T00094461001,GSBRNA2T00002415001,GSBRNA2T00018576001,GSBRNA2T00124905001,GSBRNA2T00024985001,GSBRNA2T00018425001
Biological process	response to oomycetes	GO:0002239	0.00453276	2.34364	GSBRNA2T00151456001,GSBRNA2T00007063001,GSBRNA2T00047880001,GSBRNA2T00003508001,GSBRNA2T00046971001,GSBRNA2T00000709001,GSBRNA2T00046482001,GSBRNA2T00096609001,GSBRNA2T00046481001,GSBRNA2T00016777001,GSBRNA2T00049213001,GSBRNA2T00094461001,GSBRNA2T00002415001,GSBRNA2T00018576001,GSBRNA2T00124905001,GSBRNA2T00024985001,GSBRNA2T00018425001
Biological process	phosphate ion transmembrane transport	GO:0035435	0.00552639	2.25756	GSBRNA2T00064897001,GSBRNA2T00016532001,GSBRNA2T00055202001,GSBRNA2T00017654001,GSBRNA2T00090553001,GSBRNA2T00067777001,GSBRNA2T00017656001,GSBRNA2T00031583001,GSBRNA2T00030203001,GSBRNA2T00135625001,GSBRNA2T00081597001
Biological process	glutamine family amino acid catabolic process	GO:0009065	0.00552639	2.25756	GSBRNA2T00030878001,GSBRNA2T00090129001,GSBRNA2T00019407001,GSBRNA2T00112701001,GSBRNA2T00017092001,GSBRNA2T00142964001,GSBRNA2T00008196001,GSBRNA2T00078572001,GSBRNA2T00095662001,GSBRNA2T00126668001,GSBRNA2T00033737001
Biological process	regulation of response to stress	GO:0080134	0.00552639	2.25756	GSBRNA2T00052436001,GSBRNA2T00041671001,GSBRNA2T00078004001,GSBRNA2T00117885001,GSBRNA2T00030764001,GSBRNA2T00006396001,GSBRNA2T00150459001,GSBRNA2T00085441001,GSBRNA2T00072318001,GSBRNA2T00108378001,GSBRNA2T00106932001,GSBRNA2T00139219001,GSBRNA2T00072247001,GSBRNA2T00106920001,GSBRNA2T00035595001,GSBRNA2T00156999001,GSBRNA2T00136288001,GSBRNA2T00011092001,GSBRNA2T00112220001,GSBRNA2T00028451001…
Biological process	regulation of response to stimulus	GO:0048583	0.00590901	2.22849	GSBRNA2T00052436001,GSBRNA2T00041671001,GSBRNA2T00078004001,GSBRNA2T00117885001,GSBRNA2T00030764001,GSBRNA2T00006396001,GSBRNA2T00150459001,GSBRNA2T00085441001,GSBRNA2T00121396001,GSBRNA2T00072318001,GSBRNA2T00108378001,GSBRNA2T00106932001,GSBRNA2T00139219001,GSBRNA2T00064711001,GSBRNA2T00067871001,GSBRNA2T00072247001,GSBRNA2T00106920001,GSBRNA2T00130922001,GSBRNA2T00035595001,GSBRNA2T00156999001…
Biological process	succinyl-CoA metabolic process	GO:0006104	0.00851715	2.06971	GSBRNA2T00056438001,GSBRNA2T00032774001,GSBRNA2T00050760001
Biological process	protein complex oligomerization	GO:0051259	0.0108072	1.96629	GSBRNA2T00057327001,GSBRNA2T00069948001,GSBRNA2T00082070001,GSBRNA2T00010517001,GSBRNA2T00010518001,GSBRNA2T00029992001,GSBRNA2T00003270001,GSBRNA2T00033887001
Biological process	response to stimulus	GO:0050896	0.0109517	1.96052	GSBRNA2T00087396001,GSBRNA2T00018596001,GSBRNA2T00106839001,GSBRNA2T00083918001,GSBRNA2T00022510001,GSBRNA2T00157016001,GSBRNA2T00075176001,GSBRNA2T00035567001,GSBRNA2T00077296001,GSBRNA2T00016155001,GSBRNA2T00155030001,GSBRNA2T00008668001,GSBRNA2T00002404001,GSBRNA2T00054421001,GSBRNA2T00000028001,GSBRNA2T00043132001,GSBRNA2T00072346001,GSBRNA2T00151456001,GSBRNA2T00043131001,GSBRNA2T00035570001…
Biological process	detoxification	GO:0098754	0.0115845	1.93612	GSBRNA2T00077296001,GSBRNA2T00054421001,GSBRNA2T00064141001,GSBRNA2T00074552001,GSBRNA2T00092271001,GSBRNA2T00047517001,GSBRNA2T00013915001,GSBRNA2T00043891001,GSBRNA2T00136178001,GSBRNA2T00084825001,GSBRNA2T00068642001,GSBRNA2T00067884001,GSBRNA2T00094622001,GSBRNA2T00043868001,GSBRNA2T00027608001,GSBRNA2T00019388001,GSBRNA2T00081296001,GSBRNA2T00001358001,GSBRNA2T00000056001,GSBRNA2T00059082001…
Biological process	response to UV-B	GO:0010224	0.0119721	1.92183	GSBRNA2T00094752001,GSBRNA2T00085737001,GSBRNA2T00134664001,GSBRNA2T00028065001,GSBRNA2T00047537001
Biological process	proline catabolic process	GO:0006562	0.0119721	1.92183	GSBRNA2T00112701001,GSBRNA2T00017092001,GSBRNA2T00142964001,GSBRNA2T00008196001,GSBRNA2T00033737001
Biological process	L-lysine metabolic process	GO:0046440	0.0149859	1.82432	GSBRNA2T00062544001,GSBRNA2T00060868001,GSBRNA2T00095389001,GSBRNA2T00013025001
Biological process	L-lysine catabolic process to acetyl-CoA	GO:0019474	0.0149859	1.82432	GSBRNA2T00062544001,GSBRNA2T00060868001,GSBRNA2T00095389001,GSBRNA2T00013025001
Biological process	L-lysine catabolic process	GO:0019477	0.0149859	1.82432	GSBRNA2T00062544001,GSBRNA2T00060868001,GSBRNA2T00095389001,GSBRNA2T00013025001
Biological process	lysine catabolic process	GO:0006554	0.0149859	1.82432	GSBRNA2T00062544001,GSBRNA2T00060868001,GSBRNA2T00095389001,GSBRNA2T00013025001
Biological process	pyridine-containing compound biosynthetic process	GO:0072525	0.0149859	1.82432	GSBRNA2T00135568001,GSBRNA2T00031639001,GSBRNA2T00083228001,GSBRNA2T00040751001,GSBRNA2T00122385001,GSBRNA2T00054466001,GSBRNA2T00047855001,GSBRNA2T00133077001,GSBRNA2T00034275001,GSBRNA2T00037251001,GSBRNA2T00010044001
Biological process	L-lysine catabolic process to acetyl-CoA via saccharopine	GO:0033512	0.0149859	1.82432	GSBRNA2T00062544001,GSBRNA2T00060868001,GSBRNA2T00095389001,GSBRNA2T00013025001
Biological process	multi-organism process	GO:0051704	0.0174745	1.7576	GSBRNA2T00065972001,GSBRNA2T00131588001,GSBRNA2T00078964001,GSBRNA2T00124463001,GSBRNA2T00102029001,GSBRNA2T00096206001,GSBRNA2T00057625001,GSBRNA2T00037741001,GSBRNA2T00015141001,GSBRNA2T00067500001,GSBRNA2T00105301001,GSBRNA2T00058352001,GSBRNA2T00124466001,GSBRNA2T00072180001,GSBRNA2T00117283001,GSBRNA2T00092243001,GSBRNA2T00087669001,GSBRNA2T00037742001,GSBRNA2T00105297001,GSBRNA2T00008887001…
Biological process	response to reactive oxygen species	GO:0000302	0.0187545	1.7269	GSBRNA2T00106932001,GSBRNA2T00019388001,GSBRNA2T00059511001,GSBRNA2T00038960001,GSBRNA2T00082686001,GSBRNA2T00050618001,GSBRNA2T00069948001,GSBRNA2T00082070001,GSBRNA2T00010517001,GSBRNA2T00010518001,GSBRNA2T00068633001,GSBRNA2T00029992001,GSBRNA2T00049014001,GSBRNA2T00003270001,GSBRNA2T00033887001
Biological process	response to topologically incorrect protein	GO:0035966	0.0193219	1.71395	GSBRNA2T00019355001,GSBRNA2T00069552001,GSBRNA2T00142479001,GSBRNA2T00001236001,GSBRNA2T00037387001,GSBRNA2T00021042001,GSBRNA2T00072864001,GSBRNA2T00085735001,GSBRNA2T00019733001,GSBRNA2T00080816001,GSBRNA2T00044351001,GSBRNA2T00096953001,GSBRNA2T00061266001,GSBRNA2T00096278001,GSBRNA2T00007549001,GSBRNA2T00057933001,GSBRNA2T00054203001
Biological process	cellular response to topologically incorrect protein	GO:0035967	0.0193219	1.71395	GSBRNA2T00019355001,GSBRNA2T00069552001,GSBRNA2T00142479001,GSBRNA2T00001236001,GSBRNA2T00037387001,GSBRNA2T00021042001,GSBRNA2T00072864001,GSBRNA2T00085735001,GSBRNA2T00019733001,GSBRNA2T00080816001,GSBRNA2T00044351001,GSBRNA2T00096953001,GSBRNA2T00061266001,GSBRNA2T00096278001,GSBRNA2T00007549001,GSBRNA2T00057933001,GSBRNA2T00054203001
Biological process	glutamine family amino acid metabolic process	GO:0009064	0.0193219	1.71395	GSBRNA2T00030878001,GSBRNA2T00090129001,GSBRNA2T00019407001,GSBRNA2T00112701001,GSBRNA2T00117762001,GSBRNA2T00017092001,GSBRNA2T00114519001,GSBRNA2T00065379001,GSBRNA2T00112825001,GSBRNA2T00142964001,GSBRNA2T00008196001,GSBRNA2T00017125001,GSBRNA2T00021803001,GSBRNA2T00143205001,GSBRNA2T00135415001,GSBRNA2T00078572001,GSBRNA2T00095662001,GSBRNA2T00126668001,GSBRNA2T00039914001,GSBRNA2T00026653001…
Biological process	protein localization to plasma membrane	GO:0072659	0.0195621	1.70858	GSBRNA2T00074172001,GSBRNA2T00047462001,GSBRNA2T00079228001,GSBRNA2T00132259001,GSBRNA2T00015661001,GSBRNA2T00094473001
Biological process	protein localization to cell periphery	GO:1990778	0.0195621	1.70858	GSBRNA2T00074172001,GSBRNA2T00047462001,GSBRNA2T00079228001,GSBRNA2T00132259001,GSBRNA2T00015661001,GSBRNA2T00094473001
Biological process	cellular response to unfolded protein	GO:0034620	0.0219349	1.65887	GSBRNA2T00019355001,GSBRNA2T00069552001,GSBRNA2T00142479001,GSBRNA2T00037387001,GSBRNA2T00085735001,GSBRNA2T00019733001,GSBRNA2T00080816001,GSBRNA2T00096953001,GSBRNA2T00061266001,GSBRNA2T00096278001,GSBRNA2T00007549001,GSBRNA2T00057933001,GSBRNA2T00054203001
Biological process	response to unfolded protein	GO:0006986	0.0219349	1.65887	GSBRNA2T00019355001,GSBRNA2T00069552001,GSBRNA2T00142479001,GSBRNA2T00037387001,GSBRNA2T00085735001,GSBRNA2T00019733001,GSBRNA2T00080816001,GSBRNA2T00096953001,GSBRNA2T00061266001,GSBRNA2T00096278001,GSBRNA2T00007549001,GSBRNA2T00057933001,GSBRNA2T00054203001
Biological process	oligosaccharide metabolic process	GO:0009311	0.0231786	1.63491	GSBRNA2T00055555001,GSBRNA2T00076499001,GSBRNA2T00099581001,GSBRNA2T00116170001,GSBRNA2T00131730001,GSBRNA2T00063644001,GSBRNA2T00039193001,GSBRNA2T00038035001,GSBRNA2T00017750001,GSBRNA2T00129795001,GSBRNA2T00081619001,GSBRNA2T00062437001,GSBRNA2T00140183001,GSBRNA2T00015751001,GSBRNA2T00148916001,GSBRNA2T00081377001,GSBRNA2T00004772001,GSBRNA2T00030810001,GSBRNA2T00073348001,GSBRNA2T00117906001…
Biological process	pyridine nucleotide salvage	GO:0019365	0.0238774	1.62201	GSBRNA2T00083228001,GSBRNA2T00040751001,GSBRNA2T00054466001
Biological process	nicotinate nucleotide metabolic process	GO:0046497	0.0238774	1.62201	GSBRNA2T00083228001,GSBRNA2T00040751001,GSBRNA2T00054466001
Biological process	negative regulation of carbohydrate metabolic process	GO:0045912	0.0238774	1.62201	GSBRNA2T00003358001,GSBRNA2T00016785001,GSBRNA2T00038154001,GSBRNA2T00049485001,GSBRNA2T00028976001
Biological process	NAD salvage	GO:0034355	0.0238774	1.62201	GSBRNA2T00083228001,GSBRNA2T00040751001,GSBRNA2T00054466001
Biological process	sulfate reduction	GO:0019419	0.0238774	1.62201	GSBRNA2T00156974001,GSBRNA2T00106793001,GSBRNA2T00138265001,GSBRNA2T00131663001
Biological process	nicotinate nucleotide salvage	GO:0019358	0.0238774	1.62201	GSBRNA2T00083228001,GSBRNA2T00040751001,GSBRNA2T00054466001
Biological process	nicotinate nucleotide biosynthetic process	GO:0019357	0.0238774	1.62201	GSBRNA2T00083228001,GSBRNA2T00040751001,GSBRNA2T00054466001
Biological process	cellular response to oxygen-containing compound	GO:1901701	0.0238959	1.62168	GSBRNA2T00057044001,GSBRNA2T00072318001,GSBRNA2T00043891001,GSBRNA2T00014080001,GSBRNA2T00067871001,GSBRNA2T00008105001,GSBRNA2T00074154001,GSBRNA2T00028695001,GSBRNA2T00015754001,GSBRNA2T00067884001,GSBRNA2T00035595001,GSBRNA2T00005379001,GSBRNA2T00124863001,GSBRNA2T00063644001,GSBRNA2T00039193001,GSBRNA2T00011092001,GSBRNA2T00000858001,GSBRNA2T00081457001,GSBRNA2T00028451001,GSBRNA2T00040869001…
Biological process	pyridine-containing compound metabolic process	GO:0072524	0.0259725	1.58549	GSBRNA2T00135568001,GSBRNA2T00031639001,GSBRNA2T00083228001,GSBRNA2T00040751001,GSBRNA2T00122385001,GSBRNA2T00054466001,GSBRNA2T00047855001,GSBRNA2T00133077001,GSBRNA2T00034275001,GSBRNA2T00037251001,GSBRNA2T00010044001
Biological process	response to oxidative stress	GO:0006979	0.0259725	1.58549	GSBRNA2T00077296001,GSBRNA2T00054421001,GSBRNA2T00106935001,GSBRNA2T00064141001,GSBRNA2T00074552001,GSBRNA2T00136273001,GSBRNA2T00092271001,GSBRNA2T00137271001,GSBRNA2T00047517001,GSBRNA2T00013915001,GSBRNA2T00136178001,GSBRNA2T00106932001,GSBRNA2T00068642001,GSBRNA2T00094622001,GSBRNA2T00043868001,GSBRNA2T00131144001,GSBRNA2T00027608001,GSBRNA2T00019388001,GSBRNA2T00121586001,GSBRNA2T00145490001…
Biological process	positive regulation of signal transduction	GO:0009967	0.0259725	1.58549	GSBRNA2T00063644001,GSBRNA2T00039193001,GSBRNA2T00074558001,GSBRNA2T00141391001,GSBRNA2T00095354001,GSBRNA2T00038601001,GSBRNA2T00081113001
Biological process	positive regulation of signaling	GO:0023056	0.0259725	1.58549	GSBRNA2T00063644001,GSBRNA2T00039193001,GSBRNA2T00074558001,GSBRNA2T00141391001,GSBRNA2T00095354001,GSBRNA2T00038601001,GSBRNA2T00081113001
Biological process	response to osmotic stress	GO:0006970	0.0259725	1.58549	GSBRNA2T00075176001,GSBRNA2T00023076001,GSBRNA2T00087922001,GSBRNA2T00038175001,GSBRNA2T00062162001,GSBRNA2T00002171001,GSBRNA2T00106932001,GSBRNA2T00157994001,GSBRNA2T00045180001,GSBRNA2T00034733001,GSBRNA2T00045177001,GSBRNA2T00155698001,GSBRNA2T00097285001,GSBRNA2T00069948001,GSBRNA2T00082070001,GSBRNA2T00010517001,GSBRNA2T00010518001,GSBRNA2T00029992001,GSBRNA2T00003270001,GSBRNA2T00033887001
Biological process	positive regulation of cell communication	GO:0010647	0.0259725	1.58549	GSBRNA2T00063644001,GSBRNA2T00039193001,GSBRNA2T00074558001,GSBRNA2T00141391001,GSBRNA2T00095354001,GSBRNA2T00038601001,GSBRNA2T00081113001
Biological process	transport	GO:0006810	0.0295624	1.52926	GSBRNA2T00087846001,GSBRNA2T00116222001,GSBRNA2T00064897001,GSBRNA2T00077599001,GSBRNA2T00002433001,GSBRNA2T00078853001,GSBRNA2T00023649001,GSBRNA2T00096243001,GSBRNA2T00069516001,GSBRNA2T00007444001,GSBRNA2T00072992001,GSBRNA2T00016532001,GSBRNA2T00123950001,GSBRNA2T00009760001,GSBRNA2T00120170001,GSBRNA2T00055202001,GSBRNA2T00108882001,GSBRNA2T00085231001,GSBRNA2T00069480001,GSBRNA2T00017654001…
Biological process	cellular amino acid catabolic process	GO:0009063	0.0303473	1.51788	GSBRNA2T00030878001,GSBRNA2T00090129001,GSBRNA2T00019407001,GSBRNA2T00112701001,GSBRNA2T00017092001,GSBRNA2T00142964001,GSBRNA2T00099968001,GSBRNA2T00008196001,GSBRNA2T00091375001,GSBRNA2T00078572001,GSBRNA2T00095662001,GSBRNA2T00062544001,GSBRNA2T00126668001,GSBRNA2T00126538001,GSBRNA2T00060868001,GSBRNA2T00095389001,GSBRNA2T00013025001,GSBRNA2T00045941001,GSBRNA2T00004542001,GSBRNA2T00004432001…
Biological process	cellular detoxification	GO:1990748	0.0318287	1.49718	GSBRNA2T00077296001,GSBRNA2T00054421001,GSBRNA2T00064141001,GSBRNA2T00074552001,GSBRNA2T00092271001,GSBRNA2T00047517001,GSBRNA2T00013915001,GSBRNA2T00043891001,GSBRNA2T00136178001,GSBRNA2T00084825001,GSBRNA2T00068642001,GSBRNA2T00067884001,GSBRNA2T00094622001,GSBRNA2T00043868001,GSBRNA2T00027608001,GSBRNA2T00019388001,GSBRNA2T00081296001,GSBRNA2T00000056001,GSBRNA2T00087218001,GSBRNA2T00071116001…
Biological process	cellular response to toxic substance	GO:0097237	0.0318287	1.49718	GSBRNA2T00077296001,GSBRNA2T00054421001,GSBRNA2T00064141001,GSBRNA2T00074552001,GSBRNA2T00092271001,GSBRNA2T00047517001,GSBRNA2T00013915001,GSBRNA2T00043891001,GSBRNA2T00136178001,GSBRNA2T00084825001,GSBRNA2T00068642001,GSBRNA2T00067884001,GSBRNA2T00094622001,GSBRNA2T00043868001,GSBRNA2T00027608001,GSBRNA2T00019388001,GSBRNA2T00081296001,GSBRNA2T00000056001,GSBRNA2T00087218001,GSBRNA2T00071116001…
Biological process	response to chemical	GO:0042221	0.0326635	1.48594	GSBRNA2T00018596001,GSBRNA2T00106839001,GSBRNA2T00157016001,GSBRNA2T00077296001,GSBRNA2T00002404001,GSBRNA2T00054421001,GSBRNA2T00151456001,GSBRNA2T00046820001,GSBRNA2T00002403001,GSBRNA2T00064141001,GSBRNA2T00038175001,GSBRNA2T00074552001,GSBRNA2T00062162001,GSBRNA2T00048932001,GSBRNA2T00096592001,GSBRNA2T00077234001,GSBRNA2T00057044001,GSBRNA2T00092271001,GSBRNA2T00081306001,GSBRNA2T00000642001…
Biological process	protein refolding	GO:0042026	0.0334216	1.47597	GSBRNA2T00069552001,GSBRNA2T00142479001,GSBRNA2T00085735001,GSBRNA2T00019733001,GSBRNA2T00080816001,GSBRNA2T00123626001,GSBRNA2T00096953001,GSBRNA2T00035213001,GSBRNA2T00061266001,GSBRNA2T00096278001,GSBRNA2T00137693001,GSBRNA2T00007549001,GSBRNA2T00057933001,GSBRNA2T00054203001
Biological process	post-embryonic plant organ morphogenesis	GO:0090697	0.035938	1.44445	GSBRNA2T00063644001,GSBRNA2T00034667001,GSBRNA2T00039193001,GSBRNA2T00038601001
Biological process	sucrose metabolic process	GO:0005985	0.0367804	1.43438	GSBRNA2T00076499001,GSBRNA2T00099581001,GSBRNA2T00038035001,GSBRNA2T00017750001,GSBRNA2T00129795001,GSBRNA2T00081619001,GSBRNA2T00062437001,GSBRNA2T00140183001,GSBRNA2T00015751001,GSBRNA2T00148916001,GSBRNA2T00081377001,GSBRNA2T00030810001,GSBRNA2T00073348001,GSBRNA2T00147625001
Biological process	response to salt stress	GO:0009651	0.0371717	1.42979	GSBRNA2T00075176001,GSBRNA2T00023076001,GSBRNA2T00087922001,GSBRNA2T00038175001,GSBRNA2T00062162001,GSBRNA2T00002171001,GSBRNA2T00106932001,GSBRNA2T00045180001,GSBRNA2T00034733001,GSBRNA2T00045177001,GSBRNA2T00097285001,GSBRNA2T00069948001,GSBRNA2T00082070001,GSBRNA2T00010517001,GSBRNA2T00010518001,GSBRNA2T00029992001,GSBRNA2T00003270001,GSBRNA2T00033887001
Biological process	oligosaccharide transport	GO:0015772	0.0372634	1.42872	GSBRNA2T00099581001,GSBRNA2T00081619001,GSBRNA2T00062437001,GSBRNA2T00115350001,GSBRNA2T00030810001,GSBRNA2T00073348001,GSBRNA2T00065875001
Biological process	phospholipid translocation	GO:0045332	0.0372634	1.42872	GSBRNA2T00035511001,GSBRNA2T00090477001,GSBRNA2T00098298001,GSBRNA2T00084107001,GSBRNA2T00012648001,GSBRNA2T00018767001,GSBRNA2T00080139001
Biological process	disaccharide transport	GO:0015766	0.0372634	1.42872	GSBRNA2T00099581001,GSBRNA2T00081619001,GSBRNA2T00062437001,GSBRNA2T00115350001,GSBRNA2T00030810001,GSBRNA2T00073348001,GSBRNA2T00065875001
Biological process	amino acid transport	GO:0006865	0.038409	1.41557	GSBRNA2T00077599001,GSBRNA2T00023649001,GSBRNA2T00007444001,GSBRNA2T00007627001,GSBRNA2T00049913001,GSBRNA2T00064116001,GSBRNA2T00090968001,GSBRNA2T00028739001,GSBRNA2T00065357001,GSBRNA2T00086197001,GSBRNA2T00037110001,GSBRNA2T00076991001,GSBRNA2T00063399001,GSBRNA2T00032391001,GSBRNA2T00026629001,GSBRNA2T00088395001,GSBRNA2T00019272001,GSBRNA2T00053575001,GSBRNA2T00068034001,GSBRNA2T00118587001…
Biological process	inorganic anion transmembrane transport	GO:0098661	0.0422726	1.37394	GSBRNA2T00064897001,GSBRNA2T00016532001,GSBRNA2T00055202001,GSBRNA2T00017654001,GSBRNA2T00090553001,GSBRNA2T00067777001,GSBRNA2T00017656001,GSBRNA2T00031583001,GSBRNA2T00093109001,GSBRNA2T00030203001,GSBRNA2T00140339001,GSBRNA2T00074518001,GSBRNA2T00140781001,GSBRNA2T00135625001,GSBRNA2T00040388001,GSBRNA2T00081597001
Biological process	monosaccharide catabolic process	GO:0046365	0.0467774	1.32996	GSBRNA2T00063071001,GSBRNA2T00024758001,GSBRNA2T00012859001,GSBRNA2T00047139001,GSBRNA2T00033364001,GSBRNA2T00093722001
Biological process	alpha-amino acid catabolic process	GO:1901606	0.0474647	1.32363	GSBRNA2T00030878001,GSBRNA2T00090129001,GSBRNA2T00019407001,GSBRNA2T00112701001,GSBRNA2T00017092001,GSBRNA2T00142964001,GSBRNA2T00099968001,GSBRNA2T00008196001,GSBRNA2T00091375001,GSBRNA2T00078572001,GSBRNA2T00095662001,GSBRNA2T00062544001,GSBRNA2T00126668001,GSBRNA2T00126538001,GSBRNA2T00060868001,GSBRNA2T00095389001,GSBRNA2T00013025001,GSBRNA2T00045941001,GSBRNA2T00125154001,GSBRNA2T00033737001
Biological process	cellular response to light stimulus	GO:0071482	0.0475328	1.32301	GSBRNA2T00083202001,GSBRNA2T00086360001,GSBRNA2T00136998001,GSBRNA2T00046484001,GSBRNA2T00145300001,GSBRNA2T00141391001,GSBRNA2T00095354001,GSBRNA2T00089673001

## Sheet: 20d
source	name	term_id	adjusted_p_value	-log10(adjPval)	Genes
Biological process	protein phosphorylation	GO:0006468	5.74373e-48	47.2408	GSBRNA2T00126717001,GSBRNA2T00065972001,GSBRNA2T00067501001,GSBRNA2T00131588001,GSBRNA2T00157100001,GSBRNA2T00136890001,GSBRNA2T00072668001,GSBRNA2T00016155001,GSBRNA2T00154963001,GSBRNA2T00043132001,GSBRNA2T00072664001,GSBRNA2T00157106001,GSBRNA2T00157107001,GSBRNA2T00043131001,GSBRNA2T00078964001,GSBRNA2T00136175001,GSBRNA2T00094509001,GSBRNA2T00112290001,GSBRNA2T00124463001,GSBRNA2T00072666001…
Biological process	phosphorylation	GO:0016310	2.60099e-45	44.5849	GSBRNA2T00126717001,GSBRNA2T00065972001,GSBRNA2T00067501001,GSBRNA2T00131588001,GSBRNA2T00157100001,GSBRNA2T00136890001,GSBRNA2T00072668001,GSBRNA2T00016155001,GSBRNA2T00154963001,GSBRNA2T00043132001,GSBRNA2T00072664001,GSBRNA2T00157106001,GSBRNA2T00157107001,GSBRNA2T00043131001,GSBRNA2T00078964001,GSBRNA2T00136175001,GSBRNA2T00094509001,GSBRNA2T00112290001,GSBRNA2T00124463001,GSBRNA2T00072666001…
Biological process	protein autophosphorylation	GO:0046777	8.64476e-41	40.0632	GSBRNA2T00067501001,GSBRNA2T00072668001,GSBRNA2T00072664001,GSBRNA2T00078964001,GSBRNA2T00094509001,GSBRNA2T00124463001,GSBRNA2T00072666001,GSBRNA2T00034205001,GSBRNA2T00011634001,GSBRNA2T00079857001,GSBRNA2T00028825001,GSBRNA2T00096206001,GSBRNA2T00004573001,GSBRNA2T00072942001,GSBRNA2T00062501001,GSBRNA2T00037741001,GSBRNA2T00048742001,GSBRNA2T00094506001,GSBRNA2T00048766001,GSBRNA2T00048835001…
Biological process	phosphate-containing compound metabolic process	GO:0006796	1.22181e-30	29.913	GSBRNA2T00126717001,GSBRNA2T00065972001,GSBRNA2T00067501001,GSBRNA2T00131588001,GSBRNA2T00157100001,GSBRNA2T00136890001,GSBRNA2T00072668001,GSBRNA2T00016155001,GSBRNA2T00154963001,GSBRNA2T00043132001,GSBRNA2T00072664001,GSBRNA2T00157106001,GSBRNA2T00157107001,GSBRNA2T00043131001,GSBRNA2T00078964001,GSBRNA2T00136175001,GSBRNA2T00094509001,GSBRNA2T00112290001,GSBRNA2T00124463001,GSBRNA2T00072666001…
Biological process	phosphorus metabolic process	GO:0006793	2.87534e-30	29.5413	GSBRNA2T00126717001,GSBRNA2T00065972001,GSBRNA2T00067501001,GSBRNA2T00131588001,GSBRNA2T00157100001,GSBRNA2T00136890001,GSBRNA2T00072668001,GSBRNA2T00016155001,GSBRNA2T00154963001,GSBRNA2T00043132001,GSBRNA2T00072664001,GSBRNA2T00157106001,GSBRNA2T00157107001,GSBRNA2T00043131001,GSBRNA2T00078964001,GSBRNA2T00136175001,GSBRNA2T00094509001,GSBRNA2T00112290001,GSBRNA2T00124463001,GSBRNA2T00072666001…
Biological process	photosynthesis	GO:0015979	1.27045e-25	24.896	GSBRNA2T00005208001,GSBRNA2T00033137001,GSBRNA2T00033133001,GSBRNA2T00025438001,GSBRNA2T00039084001,GSBRNA2T00031214001,GSBRNA2T00032038001,GSBRNA2T00114233001,GSBRNA2T00005815001,GSBRNA2T00139749001,GSBRNA2T00068474001,GSBRNA2T00050963001,GSBRNA2T00104628001,GSBRNA2T00105117001,GSBRNA2T00028150001,GSBRNA2T00048562001,GSBRNA2T00037045001,GSBRNA2T00125583001,GSBRNA2T00061676001,GSBRNA2T00113729001…
Biological process	photosynthesis, light harvesting	GO:0009765	4.33196e-24	23.3633	GSBRNA2T00005208001,GSBRNA2T00139749001,GSBRNA2T00028150001,GSBRNA2T00151448001,GSBRNA2T00149261001,GSBRNA2T00034252001,GSBRNA2T00020922001,GSBRNA2T00083086001,GSBRNA2T00077543001,GSBRNA2T00108591001,GSBRNA2T00003760001,GSBRNA2T00035089001,GSBRNA2T00117290001,GSBRNA2T00057907001,GSBRNA2T00035007001,GSBRNA2T00087676001,GSBRNA2T00141918001,GSBRNA2T00054222001,GSBRNA2T00076200001,GSBRNA2T00107175001…
Biological process	ribosome biogenesis	GO:0042254	1.18891e-23	22.9249	GSBRNA2T00089522001,GSBRNA2T00151202001,GSBRNA2T00069132001,GSBRNA2T00101507001,GSBRNA2T00031425001,GSBRNA2T00058134001,GSBRNA2T00010279001,GSBRNA2T00015710001,GSBRNA2T00035095001,GSBRNA2T00085472001,GSBRNA2T00071658001,GSBRNA2T00015345001,GSBRNA2T00087546001,GSBRNA2T00006801001,GSBRNA2T00020772001,GSBRNA2T00050753001,GSBRNA2T00151559001,GSBRNA2T00067354001,GSBRNA2T00026516001,GSBRNA2T00129866001…
Biological process	protein modification process	GO:0036211	1.79179e-18	17.7467	GSBRNA2T00126717001,GSBRNA2T00025147001,GSBRNA2T00065972001,GSBRNA2T00067501001,GSBRNA2T00131588001,GSBRNA2T00031973001,GSBRNA2T00139014001,GSBRNA2T00157100001,GSBRNA2T00136890001,GSBRNA2T00072668001,GSBRNA2T00016155001,GSBRNA2T00154963001,GSBRNA2T00043132001,GSBRNA2T00072664001,GSBRNA2T00157106001,GSBRNA2T00157107001,GSBRNA2T00043131001,GSBRNA2T00078964001,GSBRNA2T00136175001,GSBRNA2T00094509001…
Biological process	cellular protein modification process	GO:0006464	1.79179e-18	17.7467	GSBRNA2T00126717001,GSBRNA2T00025147001,GSBRNA2T00065972001,GSBRNA2T00067501001,GSBRNA2T00131588001,GSBRNA2T00031973001,GSBRNA2T00139014001,GSBRNA2T00157100001,GSBRNA2T00136890001,GSBRNA2T00072668001,GSBRNA2T00016155001,GSBRNA2T00154963001,GSBRNA2T00043132001,GSBRNA2T00072664001,GSBRNA2T00157106001,GSBRNA2T00157107001,GSBRNA2T00043131001,GSBRNA2T00078964001,GSBRNA2T00136175001,GSBRNA2T00094509001…
Biological process	photosynthesis, light reaction	GO:0019684	1.49802e-17	16.8245	GSBRNA2T00005208001,GSBRNA2T00033137001,GSBRNA2T00033133001,GSBRNA2T00025438001,GSBRNA2T00139749001,GSBRNA2T00028150001,GSBRNA2T00048562001,GSBRNA2T00043766001,GSBRNA2T00014879001,GSBRNA2T00151448001,GSBRNA2T00072712001,GSBRNA2T00149261001,GSBRNA2T00032049001,GSBRNA2T00016389001,GSBRNA2T00005136001,GSBRNA2T00081678001,GSBRNA2T00034252001,GSBRNA2T00023567001,GSBRNA2T00087822001,GSBRNA2T00020922001…
Biological process	systemic acquired resistance	GO:0009627	1.40532e-16	15.8522	GSBRNA2T00052436001,GSBRNA2T00041671001,GSBRNA2T00086156001,GSBRNA2T00078004001,GSBRNA2T00117885001,GSBRNA2T00030764001,GSBRNA2T00012995001,GSBRNA2T00009711001,GSBRNA2T00060850001,GSBRNA2T00077487001,GSBRNA2T00150459001,GSBRNA2T00013453001,GSBRNA2T00068342001,GSBRNA2T00085441001,GSBRNA2T00122713001,GSBRNA2T00090460001,GSBRNA2T00108378001,GSBRNA2T00139219001,GSBRNA2T00039476001,GSBRNA2T00095425001…
Biological process	protein autophosphorylation	GO:0046777	2.23371e-16	15.651	GSBRNA2T00096206001,GSBRNA2T00072665001,GSBRNA2T00048757001,GSBRNA2T00072664001,GSBRNA2T00087669001,GSBRNA2T00079857001,GSBRNA2T00074820001,GSBRNA2T00094506001,GSBRNA2T00048742001,GSBRNA2T00072666001,GSBRNA2T00094509001,GSBRNA2T00067501001,GSBRNA2T00062501001,GSBRNA2T00078964001,GSBRNA2T00011634001,GSBRNA2T00072668001,GSBRNA2T00035184001,GSBRNA2T00072942001,GSBRNA2T00048835001,GSBRNA2T00009937001…
Biological process	photosynthesis, light harvesting in photosystem I	GO:0009768	2.33954e-16	15.6309	GSBRNA2T00005208001,GSBRNA2T00028150001,GSBRNA2T00034252001,GSBRNA2T00020922001,GSBRNA2T00083086001,GSBRNA2T00077543001,GSBRNA2T00003760001,GSBRNA2T00035089001,GSBRNA2T00117290001,GSBRNA2T00057907001,GSBRNA2T00035007001,GSBRNA2T00087676001,GSBRNA2T00054222001,GSBRNA2T00076200001,GSBRNA2T00107175001,GSBRNA2T00080643001,GSBRNA2T00087322001,GSBRNA2T00009877001,GSBRNA2T00124554001,GSBRNA2T00008518001…
Biological process	rRNA processing	GO:0006364	1.18177e-15	14.9275	GSBRNA2T00089522001,GSBRNA2T00069132001,GSBRNA2T00101507001,GSBRNA2T00058134001,GSBRNA2T00010279001,GSBRNA2T00015710001,GSBRNA2T00071658001,GSBRNA2T00015345001,GSBRNA2T00006801001,GSBRNA2T00050753001,GSBRNA2T00151559001,GSBRNA2T00067354001,GSBRNA2T00026516001,GSBRNA2T00129866001,GSBRNA2T00015957001,GSBRNA2T00138973001,GSBRNA2T00072919001,GSBRNA2T00011771001,GSBRNA2T00149647001,GSBRNA2T00005809001…
Biological process	defense response	GO:0006952	7.60901e-15	14.1187	GSBRNA2T00087396001,GSBRNA2T00083918001,GSBRNA2T00022510001,GSBRNA2T00035567001,GSBRNA2T00008668001,GSBRNA2T00000028001,GSBRNA2T00072346001,GSBRNA2T00151456001,GSBRNA2T00035570001,GSBRNA2T00155060001,GSBRNA2T00113459001,GSBRNA2T00056878001,GSBRNA2T00007063001,GSBRNA2T00079053001,GSBRNA2T00025057001,GSBRNA2T00038482001,GSBRNA2T00071552001,GSBRNA2T00017772001,GSBRNA2T00035090001,GSBRNA2T00052436001…
Biological process	rRNA metabolic process	GO:0016072	1.11203e-14	13.9539	GSBRNA2T00089522001,GSBRNA2T00069132001,GSBRNA2T00101507001,GSBRNA2T00058134001,GSBRNA2T00010279001,GSBRNA2T00015710001,GSBRNA2T00071658001,GSBRNA2T00015345001,GSBRNA2T00006801001,GSBRNA2T00050753001,GSBRNA2T00151559001,GSBRNA2T00067354001,GSBRNA2T00026516001,GSBRNA2T00129866001,GSBRNA2T00015957001,GSBRNA2T00138973001,GSBRNA2T00072919001,GSBRNA2T00011771001,GSBRNA2T00149647001,GSBRNA2T00005809001…
Biological process	macromolecule modification	GO:0043412	2.09142e-14	13.6796	GSBRNA2T00126717001,GSBRNA2T00025147001,GSBRNA2T00065972001,GSBRNA2T00067501001,GSBRNA2T00131588001,GSBRNA2T00031973001,GSBRNA2T00139014001,GSBRNA2T00157100001,GSBRNA2T00136890001,GSBRNA2T00072668001,GSBRNA2T00016155001,GSBRNA2T00154963001,GSBRNA2T00043132001,GSBRNA2T00072664001,GSBRNA2T00157106001,GSBRNA2T00157107001,GSBRNA2T00043131001,GSBRNA2T00078964001,GSBRNA2T00136175001,GSBRNA2T00094509001…
Biological process	glucosamine-containing compound catabolic process	GO:1901072	3.72922e-13	12.4284	GSBRNA2T00085431001,GSBRNA2T00048186001,GSBRNA2T00024824001,GSBRNA2T00132371001,GSBRNA2T00045121001,GSBRNA2T00079736001,GSBRNA2T00150474001,GSBRNA2T00139059001,GSBRNA2T00021983001,GSBRNA2T00139058001,GSBRNA2T00050295001,GSBRNA2T00132651001,GSBRNA2T00036077001,GSBRNA2T00132649001,GSBRNA2T00108995001,GSBRNA2T00079740001,GSBRNA2T00073427001,GSBRNA2T00123467001,GSBRNA2T00025603001,GSBRNA2T00025836001…
Biological process	chitin catabolic process	GO:0006032	3.72922e-13	12.4284	GSBRNA2T00085431001,GSBRNA2T00048186001,GSBRNA2T00024824001,GSBRNA2T00132371001,GSBRNA2T00045121001,GSBRNA2T00079736001,GSBRNA2T00150474001,GSBRNA2T00139059001,GSBRNA2T00021983001,GSBRNA2T00139058001,GSBRNA2T00050295001,GSBRNA2T00132651001,GSBRNA2T00036077001,GSBRNA2T00132649001,GSBRNA2T00108995001,GSBRNA2T00079740001,GSBRNA2T00073427001,GSBRNA2T00123467001,GSBRNA2T00025603001,GSBRNA2T00025836001…
Biological process	chitin metabolic process	GO:0006030	3.72922e-13	12.4284	GSBRNA2T00085431001,GSBRNA2T00048186001,GSBRNA2T00024824001,GSBRNA2T00132371001,GSBRNA2T00045121001,GSBRNA2T00079736001,GSBRNA2T00150474001,GSBRNA2T00139059001,GSBRNA2T00021983001,GSBRNA2T00139058001,GSBRNA2T00050295001,GSBRNA2T00132651001,GSBRNA2T00036077001,GSBRNA2T00132649001,GSBRNA2T00108995001,GSBRNA2T00079740001,GSBRNA2T00073427001,GSBRNA2T00123467001,GSBRNA2T00025603001,GSBRNA2T00025836001…
Biological process	amino sugar catabolic process	GO:0046348	3.72922e-13	12.4284	GSBRNA2T00085431001,GSBRNA2T00048186001,GSBRNA2T00024824001,GSBRNA2T00132371001,GSBRNA2T00045121001,GSBRNA2T00079736001,GSBRNA2T00150474001,GSBRNA2T00139059001,GSBRNA2T00021983001,GSBRNA2T00139058001,GSBRNA2T00050295001,GSBRNA2T00132651001,GSBRNA2T00036077001,GSBRNA2T00132649001,GSBRNA2T00108995001,GSBRNA2T00079740001,GSBRNA2T00073427001,GSBRNA2T00123467001,GSBRNA2T00025603001,GSBRNA2T00025836001…
Biological process	aminoglycan catabolic process	GO:0006026	3.72922e-13	12.4284	GSBRNA2T00085431001,GSBRNA2T00048186001,GSBRNA2T00024824001,GSBRNA2T00132371001,GSBRNA2T00045121001,GSBRNA2T00079736001,GSBRNA2T00150474001,GSBRNA2T00139059001,GSBRNA2T00021983001,GSBRNA2T00139058001,GSBRNA2T00050295001,GSBRNA2T00132651001,GSBRNA2T00036077001,GSBRNA2T00132649001,GSBRNA2T00108995001,GSBRNA2T00079740001,GSBRNA2T00073427001,GSBRNA2T00123467001,GSBRNA2T00025603001,GSBRNA2T00025836001…
Biological process	cell wall macromolecule catabolic process	GO:0016998	5.67868e-13	12.2458	GSBRNA2T00085431001,GSBRNA2T00048186001,GSBRNA2T00024824001,GSBRNA2T00132371001,GSBRNA2T00045121001,GSBRNA2T00079736001,GSBRNA2T00150474001,GSBRNA2T00139059001,GSBRNA2T00021983001,GSBRNA2T00139058001,GSBRNA2T00050295001,GSBRNA2T00132651001,GSBRNA2T00036077001,GSBRNA2T00132649001,GSBRNA2T00108995001,GSBRNA2T00079740001,GSBRNA2T00073427001,GSBRNA2T00123467001,GSBRNA2T00025836001,GSBRNA2T00139050001…
Biological process	ribonucleoprotein complex biogenesis	GO:0022613	6.53817e-13	12.1845	GSBRNA2T00089522001,GSBRNA2T00151202001,GSBRNA2T00069132001,GSBRNA2T00101507001,GSBRNA2T00031425001,GSBRNA2T00058134001,GSBRNA2T00010279001,GSBRNA2T00015710001,GSBRNA2T00035095001,GSBRNA2T00085472001,GSBRNA2T00071658001,GSBRNA2T00015345001,GSBRNA2T00087546001,GSBRNA2T00006801001,GSBRNA2T00020772001,GSBRNA2T00050753001,GSBRNA2T00151559001,GSBRNA2T00028133001,GSBRNA2T00067354001,GSBRNA2T00026516001…
Biological process	aminoglycan metabolic process	GO:0006022	1.37686e-12	11.8611	GSBRNA2T00085431001,GSBRNA2T00048186001,GSBRNA2T00024824001,GSBRNA2T00132371001,GSBRNA2T00045121001,GSBRNA2T00079736001,GSBRNA2T00150474001,GSBRNA2T00139059001,GSBRNA2T00021983001,GSBRNA2T00139058001,GSBRNA2T00050295001,GSBRNA2T00132651001,GSBRNA2T00036077001,GSBRNA2T00132649001,GSBRNA2T00108995001,GSBRNA2T00079740001,GSBRNA2T00073427001,GSBRNA2T00123467001,GSBRNA2T00025603001,GSBRNA2T00025836001…
Biological process	glucosamine-containing compound metabolic process	GO:1901071	5.51521e-11	10.2584	GSBRNA2T00085431001,GSBRNA2T00048186001,GSBRNA2T00024824001,GSBRNA2T00132371001,GSBRNA2T00045121001,GSBRNA2T00079736001,GSBRNA2T00150474001,GSBRNA2T00139059001,GSBRNA2T00021983001,GSBRNA2T00139058001,GSBRNA2T00050295001,GSBRNA2T00132651001,GSBRNA2T00036077001,GSBRNA2T00132649001,GSBRNA2T00108995001,GSBRNA2T00079740001,GSBRNA2T00073427001,GSBRNA2T00123467001,GSBRNA2T00025603001,GSBRNA2T00025836001…
Biological process	glutathione metabolic process	GO:0006749	8.3861e-11	10.0764	GSBRNA2T00018596001,GSBRNA2T00027617001,GSBRNA2T00022179001,GSBRNA2T00002404001,GSBRNA2T00151674001,GSBRNA2T00049769001,GSBRNA2T00104311001,GSBRNA2T00082067001,GSBRNA2T00046820001,GSBRNA2T00002403001,GSBRNA2T00151673001,GSBRNA2T00049770001,GSBRNA2T00067869001,GSBRNA2T00096592001,GSBRNA2T00034941001,GSBRNA2T00136749001,GSBRNA2T00018439001,GSBRNA2T00119582001,GSBRNA2T00066571001,GSBRNA2T00091168001…
Biological process	response to biotic stimulus	GO:0009607	7.36522e-10	9.13281	GSBRNA2T00087396001,GSBRNA2T00083918001,GSBRNA2T00022510001,GSBRNA2T00151456001,GSBRNA2T00113459001,GSBRNA2T00007063001,GSBRNA2T00079053001,GSBRNA2T00025057001,GSBRNA2T00071552001,GSBRNA2T00017772001,GSBRNA2T00035090001,GSBRNA2T00052436001,GSBRNA2T00041671001,GSBRNA2T00086156001,GSBRNA2T00111932001,GSBRNA2T00047880001,GSBRNA2T00078004001,GSBRNA2T00117885001,GSBRNA2T00030764001,GSBRNA2T00012995001…
Biological process	regulation of systemic acquired resistance	GO:0010112	9.55876e-10	9.0196	GSBRNA2T00052436001,GSBRNA2T00041671001,GSBRNA2T00078004001,GSBRNA2T00117885001,GSBRNA2T00030764001,GSBRNA2T00150459001,GSBRNA2T00085441001,GSBRNA2T00108378001,GSBRNA2T00139219001,GSBRNA2T00072247001,GSBRNA2T00112220001
Biological process	protein phosphorylation	GO:0006468	1.055e-09	8.97675	GSBRNA2T00096206001,GSBRNA2T00016155001,GSBRNA2T00045438001,GSBRNA2T00147022001,GSBRNA2T00072665001,GSBRNA2T00126717001,GSBRNA2T00136819001,GSBRNA2T00149066001,GSBRNA2T00065972001,GSBRNA2T00074574001,GSBRNA2T00153605001,GSBRNA2T00048757001,GSBRNA2T00155769001,GSBRNA2T00136175001,GSBRNA2T00033032001,GSBRNA2T00140836001,GSBRNA2T00107067001,GSBRNA2T00029767001,GSBRNA2T00157100001,GSBRNA2T00072664001…
Biological process	defense response to other organism	GO:0098542	2.00574e-09	8.69773	GSBRNA2T00087396001,GSBRNA2T00083918001,GSBRNA2T00022510001,GSBRNA2T00151456001,GSBRNA2T00113459001,GSBRNA2T00007063001,GSBRNA2T00071552001,GSBRNA2T00017772001,GSBRNA2T00052436001,GSBRNA2T00041671001,GSBRNA2T00086156001,GSBRNA2T00111932001,GSBRNA2T00047880001,GSBRNA2T00078004001,GSBRNA2T00117885001,GSBRNA2T00030764001,GSBRNA2T00012995001,GSBRNA2T00009711001,GSBRNA2T00060850001,GSBRNA2T00077487001…
Biological process	immune response	GO:0006955	2.00574e-09	8.69773	GSBRNA2T00087396001,GSBRNA2T00083918001,GSBRNA2T00022510001,GSBRNA2T00151456001,GSBRNA2T00113459001,GSBRNA2T00007063001,GSBRNA2T00071552001,GSBRNA2T00017772001,GSBRNA2T00052436001,GSBRNA2T00041671001,GSBRNA2T00086156001,GSBRNA2T00111932001,GSBRNA2T00047880001,GSBRNA2T00078004001,GSBRNA2T00117885001,GSBRNA2T00030764001,GSBRNA2T00012995001,GSBRNA2T00009711001,GSBRNA2T00060850001,GSBRNA2T00077487001…
Biological process	immune system process	GO:0002376	2.00574e-09	8.69773	GSBRNA2T00087396001,GSBRNA2T00083918001,GSBRNA2T00022510001,GSBRNA2T00151456001,GSBRNA2T00113459001,GSBRNA2T00007063001,GSBRNA2T00071552001,GSBRNA2T00017772001,GSBRNA2T00052436001,GSBRNA2T00041671001,GSBRNA2T00086156001,GSBRNA2T00111932001,GSBRNA2T00047880001,GSBRNA2T00078004001,GSBRNA2T00117885001,GSBRNA2T00030764001,GSBRNA2T00012995001,GSBRNA2T00009711001,GSBRNA2T00060850001,GSBRNA2T00077487001…
Biological process	response to external biotic stimulus	GO:0043207	3.39442e-09	8.46923	GSBRNA2T00087396001,GSBRNA2T00083918001,GSBRNA2T00022510001,GSBRNA2T00151456001,GSBRNA2T00113459001,GSBRNA2T00007063001,GSBRNA2T00071552001,GSBRNA2T00017772001,GSBRNA2T00052436001,GSBRNA2T00041671001,GSBRNA2T00086156001,GSBRNA2T00111932001,GSBRNA2T00047880001,GSBRNA2T00078004001,GSBRNA2T00117885001,GSBRNA2T00030764001,GSBRNA2T00012995001,GSBRNA2T00009711001,GSBRNA2T00060850001,GSBRNA2T00077487001…
Biological process	response to other organism	GO:0051707	3.39442e-09	8.46923	GSBRNA2T00087396001,GSBRNA2T00083918001,GSBRNA2T00022510001,GSBRNA2T00151456001,GSBRNA2T00113459001,GSBRNA2T00007063001,GSBRNA2T00071552001,GSBRNA2T00017772001,GSBRNA2T00052436001,GSBRNA2T00041671001,GSBRNA2T00086156001,GSBRNA2T00111932001,GSBRNA2T00047880001,GSBRNA2T00078004001,GSBRNA2T00117885001,GSBRNA2T00030764001,GSBRNA2T00012995001,GSBRNA2T00009711001,GSBRNA2T00060850001,GSBRNA2T00077487001…
Biological process	biological process involved in interspecies interaction between organisms	GO:0044419	4.15985e-09	8.38092	GSBRNA2T00087396001,GSBRNA2T00083918001,GSBRNA2T00022510001,GSBRNA2T00151456001,GSBRNA2T00113459001,GSBRNA2T00007063001,GSBRNA2T00071552001,GSBRNA2T00017772001,GSBRNA2T00052436001,GSBRNA2T00041671001,GSBRNA2T00086156001,GSBRNA2T00111932001,GSBRNA2T00047880001,GSBRNA2T00078004001,GSBRNA2T00143754001,GSBRNA2T00117885001,GSBRNA2T00030764001,GSBRNA2T00012995001,GSBRNA2T00009711001,GSBRNA2T00060850001…
Biological process	cell wall macromolecule catabolic process	GO:0016998	4.22386e-09	8.37429	GSBRNA2T00085431001,GSBRNA2T00150474001,GSBRNA2T00132371001,GSBRNA2T00108995001,GSBRNA2T00021983001,GSBRNA2T00139059001,GSBRNA2T00045121001,GSBRNA2T00079736001,GSBRNA2T00050295001,GSBRNA2T00024824001,GSBRNA2T00025836001,GSBRNA2T00139058001,GSBRNA2T00073427001,GSBRNA2T00005788001,GSBRNA2T00132651001,GSBRNA2T00086247001,GSBRNA2T00129562001,GSBRNA2T00047484001,GSBRNA2T00139050001,GSBRNA2T00018360001…
Biological process	ncRNA processing	GO:0034470	4.51838e-09	8.34502	GSBRNA2T00089522001,GSBRNA2T00069132001,GSBRNA2T00101507001,GSBRNA2T00058134001,GSBRNA2T00010279001,GSBRNA2T00015710001,GSBRNA2T00092192001,GSBRNA2T00071658001,GSBRNA2T00015345001,GSBRNA2T00006801001,GSBRNA2T00050753001,GSBRNA2T00151559001,GSBRNA2T00067354001,GSBRNA2T00026516001,GSBRNA2T00129866001,GSBRNA2T00015957001,GSBRNA2T00138973001,GSBRNA2T00072919001,GSBRNA2T00011771001,GSBRNA2T00149647001…
Biological process	ribosomal large subunit biogenesis	GO:0042273	4.79932e-09	8.31882	GSBRNA2T00089522001,GSBRNA2T00069132001,GSBRNA2T00101507001,GSBRNA2T00031425001,GSBRNA2T00035095001,GSBRNA2T00085472001,GSBRNA2T00071658001,GSBRNA2T00151559001,GSBRNA2T00026516001,GSBRNA2T00015957001,GSBRNA2T00138973001,GSBRNA2T00124761001,GSBRNA2T00030377001,GSBRNA2T00083701001,GSBRNA2T00094563001,GSBRNA2T00092327001,GSBRNA2T00028757001,GSBRNA2T00020113001,GSBRNA2T00028726001,GSBRNA2T00016613001…
Biological process	amino sugar metabolic process	GO:0006040	4.8758e-09	8.31195	GSBRNA2T00085431001,GSBRNA2T00048186001,GSBRNA2T00024824001,GSBRNA2T00132371001,GSBRNA2T00045121001,GSBRNA2T00079736001,GSBRNA2T00150474001,GSBRNA2T00139059001,GSBRNA2T00021983001,GSBRNA2T00139058001,GSBRNA2T00050295001,GSBRNA2T00132651001,GSBRNA2T00036077001,GSBRNA2T00132649001,GSBRNA2T00108995001,GSBRNA2T00079740001,GSBRNA2T00073427001,GSBRNA2T00123467001,GSBRNA2T00025603001,GSBRNA2T00025836001…
Biological process	phosphorylation	GO:0016310	5.68292e-09	8.24543	GSBRNA2T00096206001,GSBRNA2T00016155001,GSBRNA2T00045438001,GSBRNA2T00147022001,GSBRNA2T00072665001,GSBRNA2T00044044001,GSBRNA2T00126717001,GSBRNA2T00136819001,GSBRNA2T00149066001,GSBRNA2T00065972001,GSBRNA2T00074574001,GSBRNA2T00153605001,GSBRNA2T00048757001,GSBRNA2T00155769001,GSBRNA2T00136175001,GSBRNA2T00033032001,GSBRNA2T00140836001,GSBRNA2T00107067001,GSBRNA2T00029767001,GSBRNA2T00157100001…
Biological process	protein-chromophore linkage	GO:0018298	2.58969e-08	7.58675	GSBRNA2T00005208001,GSBRNA2T00024857001,GSBRNA2T00089673001,GSBRNA2T00028150001,GSBRNA2T00003138001,GSBRNA2T00052772001,GSBRNA2T00034252001,GSBRNA2T00020922001,GSBRNA2T00083086001,GSBRNA2T00077543001,GSBRNA2T00003760001,GSBRNA2T00035089001,GSBRNA2T00123902001,GSBRNA2T00117290001,GSBRNA2T00057907001,GSBRNA2T00035007001,GSBRNA2T00087676001,GSBRNA2T00054222001,GSBRNA2T00076200001,GSBRNA2T00107175001…
Biological process	ribosomal small subunit biogenesis	GO:0042274	3.10356e-08	7.50814	GSBRNA2T00058134001,GSBRNA2T00151559001,GSBRNA2T00072919001,GSBRNA2T00011771001,GSBRNA2T00083320001,GSBRNA2T00005809001,GSBRNA2T00036329001,GSBRNA2T00109037001,GSBRNA2T00057897001,GSBRNA2T00094563001,GSBRNA2T00135452001,GSBRNA2T00027066001,GSBRNA2T00012004001,GSBRNA2T00051168001,GSBRNA2T00035316001,GSBRNA2T00098603001,GSBRNA2T00000386001,GSBRNA2T00015612001,GSBRNA2T00082909001,GSBRNA2T00021280001…
Biological process	sulfur compound metabolic process	GO:0006790	7.38531e-08	7.13163	GSBRNA2T00018596001,GSBRNA2T00027617001,GSBRNA2T00075176001,GSBRNA2T00068760001,GSBRNA2T00022179001,GSBRNA2T00002404001,GSBRNA2T00151674001,GSBRNA2T00049769001,GSBRNA2T00104311001,GSBRNA2T00082067001,GSBRNA2T00046820001,GSBRNA2T00002403001,GSBRNA2T00151673001,GSBRNA2T00023076001,GSBRNA2T00087922001,GSBRNA2T00049770001,GSBRNA2T00067869001,GSBRNA2T00096592001,GSBRNA2T00002171001,GSBRNA2T00034941001…
Biological process	maturation of SSU-rRNA	GO:0030490	8.02495e-08	7.09556	GSBRNA2T00058134001,GSBRNA2T00151559001,GSBRNA2T00072919001,GSBRNA2T00011771001,GSBRNA2T00005809001,GSBRNA2T00036329001,GSBRNA2T00109037001,GSBRNA2T00094563001,GSBRNA2T00027066001,GSBRNA2T00012004001,GSBRNA2T00000386001,GSBRNA2T00015612001,GSBRNA2T00021280001,GSBRNA2T00119621001,GSBRNA2T00005101001,GSBRNA2T00049305001,GSBRNA2T00075645001,GSBRNA2T00036327001,GSBRNA2T00061355001,GSBRNA2T00048276001…
Biological process	cellular modified amino acid metabolic process	GO:0006575	8.06843e-08	7.09321	GSBRNA2T00018596001,GSBRNA2T00027617001,GSBRNA2T00022179001,GSBRNA2T00002404001,GSBRNA2T00151674001,GSBRNA2T00049769001,GSBRNA2T00104311001,GSBRNA2T00082067001,GSBRNA2T00046820001,GSBRNA2T00002403001,GSBRNA2T00151673001,GSBRNA2T00049770001,GSBRNA2T00067869001,GSBRNA2T00096592001,GSBRNA2T00034941001,GSBRNA2T00136749001,GSBRNA2T00018439001,GSBRNA2T00119582001,GSBRNA2T00066571001,GSBRNA2T00091168001…
Biological process	systemic acquired resistance	GO:0009627	8.42297e-08	7.07453	GSBRNA2T00122710001,GSBRNA2T00012995001,GSBRNA2T00085441001,GSBRNA2T00052436001,GSBRNA2T00030764001,GSBRNA2T00150459001,GSBRNA2T00108378001,GSBRNA2T00012993001,GSBRNA2T00090460001,GSBRNA2T00060850001,GSBRNA2T00009711001,GSBRNA2T00041671001,GSBRNA2T00077487001,GSBRNA2T00078004001,GSBRNA2T00072247001,GSBRNA2T00122713001,GSBRNA2T00062568001,GSBRNA2T00082416001,GSBRNA2T00067871001,GSBRNA2T00095425001…
Biological process	amino sugar catabolic process	GO:0046348	1.04559e-07	6.98064	GSBRNA2T00085431001,GSBRNA2T00150474001,GSBRNA2T00132371001,GSBRNA2T00108995001,GSBRNA2T00021983001,GSBRNA2T00139059001,GSBRNA2T00045121001,GSBRNA2T00079736001,GSBRNA2T00050295001,GSBRNA2T00024824001,GSBRNA2T00025836001,GSBRNA2T00139058001,GSBRNA2T00073427001,GSBRNA2T00132651001,GSBRNA2T00129562001,GSBRNA2T00139050001,GSBRNA2T00018360001,GSBRNA2T00079751001,GSBRNA2T00121016001,GSBRNA2T00139054001…
Biological process	aminoglycan catabolic process	GO:0006026	1.04559e-07	6.98064	GSBRNA2T00085431001,GSBRNA2T00150474001,GSBRNA2T00132371001,GSBRNA2T00108995001,GSBRNA2T00021983001,GSBRNA2T00139059001,GSBRNA2T00045121001,GSBRNA2T00079736001,GSBRNA2T00050295001,GSBRNA2T00024824001,GSBRNA2T00025836001,GSBRNA2T00139058001,GSBRNA2T00073427001,GSBRNA2T00132651001,GSBRNA2T00129562001,GSBRNA2T00139050001,GSBRNA2T00018360001,GSBRNA2T00079751001,GSBRNA2T00121016001,GSBRNA2T00139054001…
Biological process	chitin metabolic process	GO:0006030	1.04559e-07	6.98064	GSBRNA2T00085431001,GSBRNA2T00150474001,GSBRNA2T00132371001,GSBRNA2T00108995001,GSBRNA2T00021983001,GSBRNA2T00139059001,GSBRNA2T00045121001,GSBRNA2T00079736001,GSBRNA2T00050295001,GSBRNA2T00024824001,GSBRNA2T00025836001,GSBRNA2T00139058001,GSBRNA2T00073427001,GSBRNA2T00132651001,GSBRNA2T00129562001,GSBRNA2T00139050001,GSBRNA2T00018360001,GSBRNA2T00079751001,GSBRNA2T00121016001,GSBRNA2T00139054001…
Biological process	chitin catabolic process	GO:0006032	1.04559e-07	6.98064	GSBRNA2T00085431001,GSBRNA2T00150474001,GSBRNA2T00132371001,GSBRNA2T00108995001,GSBRNA2T00021983001,GSBRNA2T00139059001,GSBRNA2T00045121001,GSBRNA2T00079736001,GSBRNA2T00050295001,GSBRNA2T00024824001,GSBRNA2T00025836001,GSBRNA2T00139058001,GSBRNA2T00073427001,GSBRNA2T00132651001,GSBRNA2T00129562001,GSBRNA2T00139050001,GSBRNA2T00018360001,GSBRNA2T00079751001,GSBRNA2T00121016001,GSBRNA2T00139054001…
Biological process	glucosamine-containing compound catabolic process	GO:1901072	1.04559e-07	6.98064	GSBRNA2T00085431001,GSBRNA2T00150474001,GSBRNA2T00132371001,GSBRNA2T00108995001,GSBRNA2T00021983001,GSBRNA2T00139059001,GSBRNA2T00045121001,GSBRNA2T00079736001,GSBRNA2T00050295001,GSBRNA2T00024824001,GSBRNA2T00025836001,GSBRNA2T00139058001,GSBRNA2T00073427001,GSBRNA2T00132651001,GSBRNA2T00129562001,GSBRNA2T00139050001,GSBRNA2T00018360001,GSBRNA2T00079751001,GSBRNA2T00121016001,GSBRNA2T00139054001…
Biological process	response to external stimulus	GO:0009605	2.15874e-07	6.6658	GSBRNA2T00087396001,GSBRNA2T00083918001,GSBRNA2T00022510001,GSBRNA2T00151456001,GSBRNA2T00113459001,GSBRNA2T00016532001,GSBRNA2T00055202001,GSBRNA2T00007063001,GSBRNA2T00017654001,GSBRNA2T00038175001,GSBRNA2T00071552001,GSBRNA2T00090553001,GSBRNA2T00017772001,GSBRNA2T00052436001,GSBRNA2T00041671001,GSBRNA2T00067777001,GSBRNA2T00086156001,GSBRNA2T00111932001,GSBRNA2T00047880001,GSBRNA2T00078004001…
Biological process	aminoglycan metabolic process	GO:0006022	3.50277e-07	6.45559	GSBRNA2T00085431001,GSBRNA2T00150474001,GSBRNA2T00132371001,GSBRNA2T00108995001,GSBRNA2T00021983001,GSBRNA2T00139059001,GSBRNA2T00045121001,GSBRNA2T00079736001,GSBRNA2T00050295001,GSBRNA2T00024824001,GSBRNA2T00025836001,GSBRNA2T00139058001,GSBRNA2T00073427001,GSBRNA2T00132651001,GSBRNA2T00129562001,GSBRNA2T00139050001,GSBRNA2T00018360001,GSBRNA2T00079751001,GSBRNA2T00121016001,GSBRNA2T00139054001…
Biological process	carbohydrate derivative catabolic process	GO:1901136	3.50277e-07	6.45559	GSBRNA2T00002171001,GSBRNA2T00085431001,GSBRNA2T00023076001,GSBRNA2T00087922001,GSBRNA2T00150474001,GSBRNA2T00132371001,GSBRNA2T00108995001,GSBRNA2T00021983001,GSBRNA2T00075176001,GSBRNA2T00139059001,GSBRNA2T00045121001,GSBRNA2T00079736001,GSBRNA2T00050295001,GSBRNA2T00024824001,GSBRNA2T00025836001,GSBRNA2T00139058001,GSBRNA2T00073427001,GSBRNA2T00045180001,GSBRNA2T00132651001,GSBRNA2T00129562001…
Biological process	proline metabolic process	GO:0006560	3.72504e-07	6.42887	GSBRNA2T00017092001,GSBRNA2T00112701001,GSBRNA2T00142964001,GSBRNA2T00082899001,GSBRNA2T00008196001,GSBRNA2T00059225001,GSBRNA2T00124740001,GSBRNA2T00140419001,GSBRNA2T00031643001,GSBRNA2T00009027001,GSBRNA2T00034359001,GSBRNA2T00033737001,GSBRNA2T00072614001,GSBRNA2T00069393001,GSBRNA2T00116809001,GSBRNA2T00155189001,GSBRNA2T00012577001,GSBRNA2T00123351001
Biological process	peptide metabolic process	GO:0006518	4.84506e-07	6.3147	GSBRNA2T00136751001,GSBRNA2T00082067001,GSBRNA2T00018596001,GSBRNA2T00027617001,GSBRNA2T00136749001,GSBRNA2T00049769001,GSBRNA2T00067869001,GSBRNA2T00034941001,GSBRNA2T00104311001,GSBRNA2T00002403001,GSBRNA2T00151673001,GSBRNA2T00119582001,GSBRNA2T00046820001,GSBRNA2T00002404001,GSBRNA2T00103856001,GSBRNA2T00084825001,GSBRNA2T00151674001,GSBRNA2T00022179001,GSBRNA2T00040025001,GSBRNA2T00131892001…
Biological process	carbohydrate derivative catabolic process	GO:1901136	7.07739e-07	6.15013	GSBRNA2T00075176001,GSBRNA2T00085431001,GSBRNA2T00048186001,GSBRNA2T00024824001,GSBRNA2T00132371001,GSBRNA2T00045121001,GSBRNA2T00023076001,GSBRNA2T00087922001,GSBRNA2T00079736001,GSBRNA2T00150474001,GSBRNA2T00139059001,GSBRNA2T00021983001,GSBRNA2T00139058001,GSBRNA2T00002171001,GSBRNA2T00050295001,GSBRNA2T00132651001,GSBRNA2T00036077001,GSBRNA2T00132649001,GSBRNA2T00108995001,GSBRNA2T00079740001…
Biological process	response to bacterium	GO:0009617	1.58499e-06	5.79997	GSBRNA2T00087396001,GSBRNA2T00083918001,GSBRNA2T00022510001,GSBRNA2T00151456001,GSBRNA2T00007063001,GSBRNA2T00071552001,GSBRNA2T00111932001,GSBRNA2T00047880001,GSBRNA2T00003508001,GSBRNA2T00071551001,GSBRNA2T00106932001,GSBRNA2T00046971001,GSBRNA2T00000709001,GSBRNA2T00067871001,GSBRNA2T00046482001,GSBRNA2T00096609001,GSBRNA2T00046481001,GSBRNA2T00016777001,GSBRNA2T00156999001,GSBRNA2T00049213001…
Biological process	cellular amide metabolic process	GO:0043603	1.80713e-06	5.74301	GSBRNA2T00136751001,GSBRNA2T00082067001,GSBRNA2T00018596001,GSBRNA2T00027617001,GSBRNA2T00136749001,GSBRNA2T00049769001,GSBRNA2T00067869001,GSBRNA2T00034941001,GSBRNA2T00104311001,GSBRNA2T00002403001,GSBRNA2T00151673001,GSBRNA2T00119582001,GSBRNA2T00046820001,GSBRNA2T00002404001,GSBRNA2T00103856001,GSBRNA2T00084825001,GSBRNA2T00151674001,GSBRNA2T00022179001,GSBRNA2T00040025001,GSBRNA2T00131892001…
Biological process	phosphate-containing compound metabolic process	GO:0006796	2.50673e-06	5.60089	GSBRNA2T00096206001,GSBRNA2T00016155001,GSBRNA2T00045438001,GSBRNA2T00147022001,GSBRNA2T00072665001,GSBRNA2T00044044001,GSBRNA2T00126717001,GSBRNA2T00136819001,GSBRNA2T00149066001,GSBRNA2T00065972001,GSBRNA2T00074574001,GSBRNA2T00153605001,GSBRNA2T00048757001,GSBRNA2T00155769001,GSBRNA2T00136175001,GSBRNA2T00033032001,GSBRNA2T00140836001,GSBRNA2T00107067001,GSBRNA2T00029767001,GSBRNA2T00157100001…
Biological process	phosphorus metabolic process	GO:0006793	2.76219e-06	5.55875	GSBRNA2T00096206001,GSBRNA2T00016155001,GSBRNA2T00045438001,GSBRNA2T00147022001,GSBRNA2T00072665001,GSBRNA2T00044044001,GSBRNA2T00126717001,GSBRNA2T00136819001,GSBRNA2T00149066001,GSBRNA2T00065972001,GSBRNA2T00074574001,GSBRNA2T00153605001,GSBRNA2T00048757001,GSBRNA2T00155769001,GSBRNA2T00136175001,GSBRNA2T00033032001,GSBRNA2T00140836001,GSBRNA2T00107067001,GSBRNA2T00029767001,GSBRNA2T00157100001…
Biological process	defense response to bacterium	GO:0042742	4.96795e-06	5.30382	GSBRNA2T00087396001,GSBRNA2T00083918001,GSBRNA2T00022510001,GSBRNA2T00007063001,GSBRNA2T00071552001,GSBRNA2T00111932001,GSBRNA2T00047880001,GSBRNA2T00003508001,GSBRNA2T00071551001,GSBRNA2T00106932001,GSBRNA2T00046971001,GSBRNA2T00000709001,GSBRNA2T00067871001,GSBRNA2T00046482001,GSBRNA2T00096609001,GSBRNA2T00046481001,GSBRNA2T00016777001,GSBRNA2T00156999001,GSBRNA2T00049213001,GSBRNA2T00045998001…
Biological process	glucosamine-containing compound metabolic process	GO:1901071	7.31781e-06	5.13562	GSBRNA2T00085431001,GSBRNA2T00150474001,GSBRNA2T00132371001,GSBRNA2T00108995001,GSBRNA2T00021983001,GSBRNA2T00139059001,GSBRNA2T00045121001,GSBRNA2T00079736001,GSBRNA2T00050295001,GSBRNA2T00024824001,GSBRNA2T00025836001,GSBRNA2T00139058001,GSBRNA2T00073427001,GSBRNA2T00132651001,GSBRNA2T00129562001,GSBRNA2T00139050001,GSBRNA2T00018360001,GSBRNA2T00079751001,GSBRNA2T00121016001,GSBRNA2T00139054001…
Biological process	ncRNA metabolic process	GO:0034660	8.13635e-06	5.08957	GSBRNA2T00100017001,GSBRNA2T00089522001,GSBRNA2T00069132001,GSBRNA2T00101507001,GSBRNA2T00058134001,GSBRNA2T00010279001,GSBRNA2T00015710001,GSBRNA2T00092192001,GSBRNA2T00071658001,GSBRNA2T00015345001,GSBRNA2T00006801001,GSBRNA2T00050753001,GSBRNA2T00151559001,GSBRNA2T00067354001,GSBRNA2T00026516001,GSBRNA2T00129866001,GSBRNA2T00015957001,GSBRNA2T00037113001,GSBRNA2T00138973001,GSBRNA2T00072919001…
Biological process	small molecule catabolic process	GO:0044282	9.4848e-06	5.02297	GSBRNA2T00030878001,GSBRNA2T00151456001,GSBRNA2T00090129001,GSBRNA2T00019407001,GSBRNA2T00112701001,GSBRNA2T00017092001,GSBRNA2T00043891001,GSBRNA2T00142964001,GSBRNA2T00067884001,GSBRNA2T00099968001,GSBRNA2T00008196001,GSBRNA2T00047527001,GSBRNA2T00077278001,GSBRNA2T00141689001,GSBRNA2T00091375001,GSBRNA2T00063071001,GSBRNA2T00024758001,GSBRNA2T00078572001,GSBRNA2T00012859001,GSBRNA2T00095662001…
Biological process	regulation of immune response	GO:0050776	9.51217e-06	5.02172	GSBRNA2T00052436001,GSBRNA2T00041671001,GSBRNA2T00078004001,GSBRNA2T00117885001,GSBRNA2T00030764001,GSBRNA2T00150459001,GSBRNA2T00085441001,GSBRNA2T00108378001,GSBRNA2T00106932001,GSBRNA2T00139219001,GSBRNA2T00072247001,GSBRNA2T00106920001,GSBRNA2T00156999001,GSBRNA2T00136288001,GSBRNA2T00112220001,GSBRNA2T00134370001,GSBRNA2T00004969001
Biological process	regulation of response to biotic stimulus	GO:0002831	9.51217e-06	5.02172	GSBRNA2T00052436001,GSBRNA2T00041671001,GSBRNA2T00078004001,GSBRNA2T00117885001,GSBRNA2T00030764001,GSBRNA2T00150459001,GSBRNA2T00085441001,GSBRNA2T00108378001,GSBRNA2T00106932001,GSBRNA2T00139219001,GSBRNA2T00072247001,GSBRNA2T00106920001,GSBRNA2T00156999001,GSBRNA2T00136288001,GSBRNA2T00112220001,GSBRNA2T00134370001,GSBRNA2T00004969001
Biological process	regulation of immune system process	GO:0002682	9.51217e-06	5.02172	GSBRNA2T00052436001,GSBRNA2T00041671001,GSBRNA2T00078004001,GSBRNA2T00117885001,GSBRNA2T00030764001,GSBRNA2T00150459001,GSBRNA2T00085441001,GSBRNA2T00108378001,GSBRNA2T00106932001,GSBRNA2T00139219001,GSBRNA2T00072247001,GSBRNA2T00106920001,GSBRNA2T00156999001,GSBRNA2T00136288001,GSBRNA2T00112220001,GSBRNA2T00134370001,GSBRNA2T00004969001
Biological process	regulation of response to external stimulus	GO:0032101	9.51217e-06	5.02172	GSBRNA2T00052436001,GSBRNA2T00041671001,GSBRNA2T00078004001,GSBRNA2T00117885001,GSBRNA2T00030764001,GSBRNA2T00150459001,GSBRNA2T00085441001,GSBRNA2T00108378001,GSBRNA2T00106932001,GSBRNA2T00139219001,GSBRNA2T00072247001,GSBRNA2T00106920001,GSBRNA2T00156999001,GSBRNA2T00136288001,GSBRNA2T00112220001,GSBRNA2T00134370001,GSBRNA2T00004969001
Biological process	glutathione metabolic process	GO:0006749	2.41967e-05	4.61624	GSBRNA2T00136751001,GSBRNA2T00082067001,GSBRNA2T00018596001,GSBRNA2T00027617001,GSBRNA2T00136749001,GSBRNA2T00049769001,GSBRNA2T00067869001,GSBRNA2T00034941001,GSBRNA2T00104311001,GSBRNA2T00002403001,GSBRNA2T00151673001,GSBRNA2T00119582001,GSBRNA2T00046820001,GSBRNA2T00002404001,GSBRNA2T00151674001,GSBRNA2T00022179001,GSBRNA2T00131892001,GSBRNA2T00096592001,GSBRNA2T00091168001,GSBRNA2T00003276001…
Biological process	regulation of photosynthesis	GO:0010109	2.55246e-05	4.59304	GSBRNA2T00048562001,GSBRNA2T00032049001,GSBRNA2T00016389001,GSBRNA2T00003358001,GSBRNA2T00081678001,GSBRNA2T00054097001,GSBRNA2T00097862001,GSBRNA2T00046185001,GSBRNA2T00134966001,GSBRNA2T00038154001,GSBRNA2T00005668001,GSBRNA2T00049485001,GSBRNA2T00028976001
Biological process	recognition of pollen	GO:0048544	3.01976e-05	4.52003	GSBRNA2T00065972001,GSBRNA2T00131588001,GSBRNA2T00078964001,GSBRNA2T00124463001,GSBRNA2T00096206001,GSBRNA2T00057625001,GSBRNA2T00037741001,GSBRNA2T00015141001,GSBRNA2T00067500001,GSBRNA2T00105301001,GSBRNA2T00058352001,GSBRNA2T00124466001,GSBRNA2T00072180001,GSBRNA2T00117283001,GSBRNA2T00092243001,GSBRNA2T00087669001,GSBRNA2T00037742001,GSBRNA2T00105297001,GSBRNA2T00008887001,GSBRNA2T00031197001…
Biological process	cell recognition	GO:0008037	3.26824e-05	4.48569	GSBRNA2T00065972001,GSBRNA2T00131588001,GSBRNA2T00078964001,GSBRNA2T00124463001,GSBRNA2T00096206001,GSBRNA2T00057625001,GSBRNA2T00037741001,GSBRNA2T00015141001,GSBRNA2T00067500001,GSBRNA2T00105301001,GSBRNA2T00058352001,GSBRNA2T00124466001,GSBRNA2T00072180001,GSBRNA2T00117283001,GSBRNA2T00092243001,GSBRNA2T00087669001,GSBRNA2T00037742001,GSBRNA2T00105297001,GSBRNA2T00008887001,GSBRNA2T00031197001…
Biological process	pollen-pistil interaction	GO:0009875	3.9178e-05	4.40696	GSBRNA2T00065972001,GSBRNA2T00131588001,GSBRNA2T00078964001,GSBRNA2T00124463001,GSBRNA2T00096206001,GSBRNA2T00057625001,GSBRNA2T00037741001,GSBRNA2T00015141001,GSBRNA2T00067500001,GSBRNA2T00105301001,GSBRNA2T00058352001,GSBRNA2T00124466001,GSBRNA2T00072180001,GSBRNA2T00117283001,GSBRNA2T00092243001,GSBRNA2T00087669001,GSBRNA2T00037742001,GSBRNA2T00105297001,GSBRNA2T00008887001,GSBRNA2T00031197001…
Biological process	regulation of reductive pentose-phosphate cycle	GO:0080152	6.2811e-05	4.20196	GSBRNA2T00003358001,GSBRNA2T00016785001,GSBRNA2T00038154001,GSBRNA2T00049485001,GSBRNA2T00028976001
Biological process	obsolete oxidation-reduction process	GO:0055114	6.2811e-05	4.20196	GSBRNA2T00002751001,GSBRNA2T00138904001,GSBRNA2T00072332001,GSBRNA2T00035581001,GSBRNA2T00004831001,GSBRNA2T00002750001,GSBRNA2T00104806001,GSBRNA2T00029904001,GSBRNA2T00027343001,GSBRNA2T00090596001,GSBRNA2T00111327001,GSBRNA2T00008945001,GSBRNA2T00077296001,GSBRNA2T00001024001,GSBRNA2T00142450001,GSBRNA2T00027986001,GSBRNA2T00070338001,GSBRNA2T00054421001,GSBRNA2T00057616001,GSBRNA2T00151456001…
Biological process	negative regulation of photosynthesis	GO:1905156	6.2811e-05	4.20196	GSBRNA2T00003358001,GSBRNA2T00016785001,GSBRNA2T00038154001,GSBRNA2T00049485001,GSBRNA2T00028976001
Biological process	pollination	GO:0009856	6.2811e-05	4.20196	GSBRNA2T00065972001,GSBRNA2T00131588001,GSBRNA2T00078964001,GSBRNA2T00124463001,GSBRNA2T00096206001,GSBRNA2T00057625001,GSBRNA2T00037741001,GSBRNA2T00015141001,GSBRNA2T00067500001,GSBRNA2T00105301001,GSBRNA2T00058352001,GSBRNA2T00124466001,GSBRNA2T00072180001,GSBRNA2T00117283001,GSBRNA2T00092243001,GSBRNA2T00087669001,GSBRNA2T00037742001,GSBRNA2T00105297001,GSBRNA2T00008887001,GSBRNA2T00031197001…
Biological process	regulation of photosynthesis, dark reaction	GO:0010110	6.2811e-05	4.20196	GSBRNA2T00003358001,GSBRNA2T00016785001,GSBRNA2T00038154001,GSBRNA2T00049485001,GSBRNA2T00028976001
Biological process	negative regulation of reductive pentose-phosphate cycle	GO:0080153	6.2811e-05	4.20196	GSBRNA2T00003358001,GSBRNA2T00016785001,GSBRNA2T00038154001,GSBRNA2T00049485001,GSBRNA2T00028976001
Biological process	multi-multicellular organism process	GO:0044706	6.2811e-05	4.20196	GSBRNA2T00065972001,GSBRNA2T00131588001,GSBRNA2T00078964001,GSBRNA2T00124463001,GSBRNA2T00096206001,GSBRNA2T00057625001,GSBRNA2T00037741001,GSBRNA2T00015141001,GSBRNA2T00067500001,GSBRNA2T00105301001,GSBRNA2T00058352001,GSBRNA2T00124466001,GSBRNA2T00072180001,GSBRNA2T00117283001,GSBRNA2T00092243001,GSBRNA2T00087669001,GSBRNA2T00037742001,GSBRNA2T00105297001,GSBRNA2T00008887001,GSBRNA2T00031197001…
Biological process	response to salt stress	GO:0009651	7.18061e-05	4.14384	GSBRNA2T00002171001,GSBRNA2T00023076001,GSBRNA2T00087922001,GSBRNA2T00075176001,GSBRNA2T00038175001,GSBRNA2T00045180001,GSBRNA2T00106932001,GSBRNA2T00087923001,GSBRNA2T00022049001,GSBRNA2T00034733001,GSBRNA2T00045177001,GSBRNA2T00001878001,GSBRNA2T00028880001,GSBRNA2T00119539001,GSBRNA2T00007249001,GSBRNA2T00061152001,GSBRNA2T00097285001,GSBRNA2T00073908001,GSBRNA2T00006457001,GSBRNA2T00024146001…
Biological process	cell wall macromolecule metabolic process	GO:0044036	9.41539e-05	4.02616	GSBRNA2T00085431001,GSBRNA2T00048186001,GSBRNA2T00024824001,GSBRNA2T00132371001,GSBRNA2T00045121001,GSBRNA2T00107727001,GSBRNA2T00079736001,GSBRNA2T00150474001,GSBRNA2T00139059001,GSBRNA2T00021983001,GSBRNA2T00139058001,GSBRNA2T00055196001,GSBRNA2T00050295001,GSBRNA2T00132651001,GSBRNA2T00036077001,GSBRNA2T00132649001,GSBRNA2T00108995001,GSBRNA2T00079740001,GSBRNA2T00018372001,GSBRNA2T00073427001…
Biological process	amino sugar metabolic process	GO:0006040	0.000116814	3.93251	GSBRNA2T00085431001,GSBRNA2T00150474001,GSBRNA2T00132371001,GSBRNA2T00108995001,GSBRNA2T00021983001,GSBRNA2T00139059001,GSBRNA2T00045121001,GSBRNA2T00079736001,GSBRNA2T00050295001,GSBRNA2T00024824001,GSBRNA2T00025836001,GSBRNA2T00139058001,GSBRNA2T00073427001,GSBRNA2T00132651001,GSBRNA2T00129562001,GSBRNA2T00139050001,GSBRNA2T00018360001,GSBRNA2T00079751001,GSBRNA2T00121016001,GSBRNA2T00139054001…
Biological process	regulation of defense response	GO:0031347	0.000120224	3.92001	GSBRNA2T00052436001,GSBRNA2T00041671001,GSBRNA2T00078004001,GSBRNA2T00117885001,GSBRNA2T00030764001,GSBRNA2T00150459001,GSBRNA2T00085441001,GSBRNA2T00072318001,GSBRNA2T00108378001,GSBRNA2T00106932001,GSBRNA2T00139219001,GSBRNA2T00072247001,GSBRNA2T00106920001,GSBRNA2T00035595001,GSBRNA2T00156999001,GSBRNA2T00136288001,GSBRNA2T00011092001,GSBRNA2T00112220001,GSBRNA2T00028451001,GSBRNA2T00020988001…
Biological process	carbohydrate metabolic process	GO:0005975	0.000141248	3.85002	GSBRNA2T00134702001,GSBRNA2T00045069001,GSBRNA2T00002171001,GSBRNA2T00018372001,GSBRNA2T00085431001,GSBRNA2T00116481001,GSBRNA2T00023076001,GSBRNA2T00138959001,GSBRNA2T00087922001,GSBRNA2T00150474001,GSBRNA2T00064086001,GSBRNA2T00076499001,GSBRNA2T00132371001,GSBRNA2T00126194001,GSBRNA2T00108995001,GSBRNA2T00021983001,GSBRNA2T00047004001,GSBRNA2T00075176001,GSBRNA2T00155562001,GSBRNA2T00107727001…
Biological process	response to osmotic stress	GO:0006970	0.000147889	3.83006	GSBRNA2T00002171001,GSBRNA2T00023076001,GSBRNA2T00087922001,GSBRNA2T00075176001,GSBRNA2T00157994001,GSBRNA2T00038175001,GSBRNA2T00045180001,GSBRNA2T00106932001,GSBRNA2T00087923001,GSBRNA2T00155698001,GSBRNA2T00022049001,GSBRNA2T00034733001,GSBRNA2T00045177001,GSBRNA2T00001878001,GSBRNA2T00028880001,GSBRNA2T00119539001,GSBRNA2T00007249001,GSBRNA2T00061152001,GSBRNA2T00097285001,GSBRNA2T00073908001…
Biological process	cellular modified amino acid metabolic process	GO:0006575	0.000200014	3.69894	GSBRNA2T00136751001,GSBRNA2T00082067001,GSBRNA2T00018596001,GSBRNA2T00027617001,GSBRNA2T00136749001,GSBRNA2T00049769001,GSBRNA2T00067869001,GSBRNA2T00034941001,GSBRNA2T00104311001,GSBRNA2T00002403001,GSBRNA2T00151673001,GSBRNA2T00119582001,GSBRNA2T00046820001,GSBRNA2T00002404001,GSBRNA2T00151674001,GSBRNA2T00022179001,GSBRNA2T00131892001,GSBRNA2T00096592001,GSBRNA2T00091168001,GSBRNA2T00003276001…
Biological process	lipid transport	GO:0006869	0.000205637	3.6869	GSBRNA2T00069516001,GSBRNA2T00032396001,GSBRNA2T00108427001,GSBRNA2T00035511001,GSBRNA2T00090477001,GSBRNA2T00102035001,GSBRNA2T00066288001,GSBRNA2T00098298001,GSBRNA2T00084107001,GSBRNA2T00012648001,GSBRNA2T00058485001,GSBRNA2T00136303001,GSBRNA2T00106897001,GSBRNA2T00123995001,GSBRNA2T00103362001,GSBRNA2T00027223001,GSBRNA2T00053271001,GSBRNA2T00018767001,GSBRNA2T00063072001,GSBRNA2T00024762001…
Biological process	response to abiotic stimulus	GO:0009628	0.00021655	3.66444	GSBRNA2T00002171001,GSBRNA2T00023076001,GSBRNA2T00087922001,GSBRNA2T00075176001,GSBRNA2T00023135001,GSBRNA2T00157994001,GSBRNA2T00028157001,GSBRNA2T00038175001,GSBRNA2T00064711001,GSBRNA2T00001515001,GSBRNA2T00045180001,GSBRNA2T00001830001,GSBRNA2T00106932001,GSBRNA2T00087923001,GSBRNA2T00005208001,GSBRNA2T00048645001,GSBRNA2T00155698001,GSBRNA2T00022049001,GSBRNA2T00123748001,GSBRNA2T00019791001…
Biological process	transmembrane transport	GO:0055085	0.000218724	3.6601	GSBRNA2T00087846001,GSBRNA2T00116222001,GSBRNA2T00064897001,GSBRNA2T00002433001,GSBRNA2T00078853001,GSBRNA2T00023649001,GSBRNA2T00096243001,GSBRNA2T00072992001,GSBRNA2T00016532001,GSBRNA2T00123950001,GSBRNA2T00009760001,GSBRNA2T00055202001,GSBRNA2T00085231001,GSBRNA2T00069480001,GSBRNA2T00017654001,GSBRNA2T00137724001,GSBRNA2T00068067001,GSBRNA2T00129939001,GSBRNA2T00156728001,GSBRNA2T00136789001…
Biological process	response to stress	GO:0006950	0.000218724	3.6601	GSBRNA2T00087396001,GSBRNA2T00083918001,GSBRNA2T00022510001,GSBRNA2T00075176001,GSBRNA2T00035567001,GSBRNA2T00077296001,GSBRNA2T00008668001,GSBRNA2T00054421001,GSBRNA2T00000028001,GSBRNA2T00072346001,GSBRNA2T00151456001,GSBRNA2T00035570001,GSBRNA2T00155060001,GSBRNA2T00113459001,GSBRNA2T00016532001,GSBRNA2T00055202001,GSBRNA2T00056878001,GSBRNA2T00123829001,GSBRNA2T00023076001,GSBRNA2T00106935001…
Biological process	cell surface receptor signaling pathway	GO:0007166	0.000223622	3.65048	GSBRNA2T00016155001,GSBRNA2T00043132001,GSBRNA2T00043131001,GSBRNA2T00007063001,GSBRNA2T00047880001,GSBRNA2T00037909001,GSBRNA2T00003508001,GSBRNA2T00042780001,GSBRNA2T00046971001,GSBRNA2T00000709001,GSBRNA2T00024797001,GSBRNA2T00046482001,GSBRNA2T00096609001,GSBRNA2T00042785001,GSBRNA2T00046481001,GSBRNA2T00043133001,GSBRNA2T00042786001,GSBRNA2T00016777001,GSBRNA2T00049213001,GSBRNA2T00094461001…
Biological process	phospholipid transport	GO:0015914	0.000223622	3.65048	GSBRNA2T00108427001,GSBRNA2T00035511001,GSBRNA2T00090477001,GSBRNA2T00066288001,GSBRNA2T00098298001,GSBRNA2T00084107001,GSBRNA2T00012648001,GSBRNA2T00058485001,GSBRNA2T00136303001,GSBRNA2T00106897001,GSBRNA2T00103362001,GSBRNA2T00027223001,GSBRNA2T00018767001,GSBRNA2T00158212001,GSBRNA2T00080139001,GSBRNA2T00117977001,GSBRNA2T00037931001
Biological process	response to inorganic substance	GO:0010035	0.00038791	3.41127	GSBRNA2T00018596001,GSBRNA2T00048932001,GSBRNA2T00057044001,GSBRNA2T00103856001,GSBRNA2T00038175001,GSBRNA2T00084825001,GSBRNA2T00044595001,GSBRNA2T00055921001,GSBRNA2T00106932001,GSBRNA2T00044594001,GSBRNA2T00043215001,GSBRNA2T00015198001,GSBRNA2T00005451001,GSBRNA2T00047387001,GSBRNA2T00137461001,GSBRNA2T00085342001,GSBRNA2T00024896001,GSBRNA2T00122261001,GSBRNA2T00000350001,GSBRNA2T00045156001…
Biological process	organophosphate ester transport	GO:0015748	0.000415712	3.38121	GSBRNA2T00108427001,GSBRNA2T00035511001,GSBRNA2T00090477001,GSBRNA2T00066288001,GSBRNA2T00098298001,GSBRNA2T00084107001,GSBRNA2T00012648001,GSBRNA2T00058485001,GSBRNA2T00136303001,GSBRNA2T00106897001,GSBRNA2T00103362001,GSBRNA2T00027223001,GSBRNA2T00018767001,GSBRNA2T00158212001,GSBRNA2T00022568001,GSBRNA2T00068880001,GSBRNA2T00151902001,GSBRNA2T00080139001,GSBRNA2T00103075001,GSBRNA2T00139757001…
Biological process	xenobiotic transport	GO:0042908	0.000419187	3.37759	GSBRNA2T00096243001,GSBRNA2T00085231001,GSBRNA2T00020001001,GSBRNA2T00093137001,GSBRNA2T00016242001,GSBRNA2T00008659001,GSBRNA2T00073946001,GSBRNA2T00096241001,GSBRNA2T00075105001,GSBRNA2T00064711001,GSBRNA2T00026389001,GSBRNA2T00002624001,GSBRNA2T00026391001,GSBRNA2T00066740001,GSBRNA2T00067997001,GSBRNA2T00018547001,GSBRNA2T00006634001,GSBRNA2T00033906001,GSBRNA2T00000741001,GSBRNA2T00043379001…
Biological process	obsolete oxidation-reduction process	GO:0055114	0.000425072	3.37154	GSBRNA2T00054421001,GSBRNA2T00051870001,GSBRNA2T00078035001,GSBRNA2T00049389001,GSBRNA2T00031546001,GSBRNA2T00111327001,GSBRNA2T00066118001,GSBRNA2T00001024001,GSBRNA2T00027343001,GSBRNA2T00035581001,GSBRNA2T00068642001,GSBRNA2T00157022001,GSBRNA2T00004831001,GSBRNA2T00105374001,GSBRNA2T00065643001,GSBRNA2T00106935001,GSBRNA2T00070338001,GSBRNA2T00029904001,GSBRNA2T00074552001,GSBRNA2T00141057001…
Biological process	L-proline biosynthetic process	GO:0055129	0.000425072	3.37154	GSBRNA2T00124740001,GSBRNA2T00140419001,GSBRNA2T00031643001,GSBRNA2T00009027001,GSBRNA2T00034359001,GSBRNA2T00072614001,GSBRNA2T00069393001,GSBRNA2T00116809001,GSBRNA2T00155189001,GSBRNA2T00012577001,GSBRNA2T00123351001
Biological process	sulfur compound metabolic process	GO:0006790	0.000425072	3.37154	GSBRNA2T00136751001,GSBRNA2T00068760001,GSBRNA2T00082067001,GSBRNA2T00002171001,GSBRNA2T00023076001,GSBRNA2T00024910001,GSBRNA2T00018596001,GSBRNA2T00087922001,GSBRNA2T00027617001,GSBRNA2T00136749001,GSBRNA2T00075176001,GSBRNA2T00049769001,GSBRNA2T00067869001,GSBRNA2T00034941001,GSBRNA2T00104311001,GSBRNA2T00002403001,GSBRNA2T00151673001,GSBRNA2T00119582001,GSBRNA2T00093584001,GSBRNA2T00046820001…
Biological process	peptide biosynthetic process	GO:0043043	0.000425072	3.37154	GSBRNA2T00103856001,GSBRNA2T00084825001,GSBRNA2T00150600001,GSBRNA2T00100017001,GSBRNA2T00143276001,GSBRNA2T00037097001,GSBRNA2T00058134001,GSBRNA2T00035095001,GSBRNA2T00117297001,GSBRNA2T00126199001,GSBRNA2T00130385001,GSBRNA2T00134679001,GSBRNA2T00043812001,GSBRNA2T00050072001,GSBRNA2T00096731001,GSBRNA2T00028133001,GSBRNA2T00109460001,GSBRNA2T00037113001,GSBRNA2T00091599001,GSBRNA2T00016416001…
Biological process	translation	GO:0006412	0.000425072	3.37154	GSBRNA2T00150600001,GSBRNA2T00100017001,GSBRNA2T00143276001,GSBRNA2T00037097001,GSBRNA2T00058134001,GSBRNA2T00035095001,GSBRNA2T00117297001,GSBRNA2T00126199001,GSBRNA2T00130385001,GSBRNA2T00134679001,GSBRNA2T00043812001,GSBRNA2T00050072001,GSBRNA2T00096731001,GSBRNA2T00028133001,GSBRNA2T00037113001,GSBRNA2T00091599001,GSBRNA2T00016416001,GSBRNA2T00138828001,GSBRNA2T00083320001,GSBRNA2T00009699001…
Biological process	organonitrogen compound metabolic process	GO:1901564	0.000432177	3.36434	GSBRNA2T00039154001,GSBRNA2T00096206001,GSBRNA2T00090129001,GSBRNA2T00136751001,GSBRNA2T00016155001,GSBRNA2T00045438001,GSBRNA2T00082067001,GSBRNA2T00147022001,GSBRNA2T00002171001,GSBRNA2T00085431001,GSBRNA2T00072665001,GSBRNA2T00023076001,GSBRNA2T00126717001,GSBRNA2T00136819001,GSBRNA2T00149066001,GSBRNA2T00018596001,GSBRNA2T00065972001,GSBRNA2T00087922001,GSBRNA2T00150474001,GSBRNA2T00074574001…
Biological process	ribosome assembly	GO:0042255	0.000561911	3.25033	GSBRNA2T00151202001,GSBRNA2T00031425001,GSBRNA2T00035095001,GSBRNA2T00083320001,GSBRNA2T00005809001,GSBRNA2T00115232001,GSBRNA2T00030377001,GSBRNA2T00057897001,GSBRNA2T00092327001,GSBRNA2T00028757001,GSBRNA2T00020113001,GSBRNA2T00028726001,GSBRNA2T00094148001,GSBRNA2T00089404001,GSBRNA2T00051168001,GSBRNA2T00006524001,GSBRNA2T00082909001,GSBRNA2T00128368001,GSBRNA2T00119621001,GSBRNA2T00053888001…
Biological process	starch metabolic process	GO:0005982	0.000605441	3.21793	GSBRNA2T00019792001,GSBRNA2T00014452001,GSBRNA2T00087409001,GSBRNA2T00043725001,GSBRNA2T00091167001,GSBRNA2T00077208001,GSBRNA2T00144434001,GSBRNA2T00153581001,GSBRNA2T00110776001,GSBRNA2T00129361001,GSBRNA2T00147519001,GSBRNA2T00020677001,GSBRNA2T00000348001,GSBRNA2T00093825001,GSBRNA2T00109234001,GSBRNA2T00038740001,GSBRNA2T00015165001,GSBRNA2T00112095001,GSBRNA2T00057206001,GSBRNA2T00100304001…
Biological process	proline biosynthetic process	GO:0006561	0.000698315	3.15595	GSBRNA2T00124740001,GSBRNA2T00140419001,GSBRNA2T00031643001,GSBRNA2T00009027001,GSBRNA2T00034359001,GSBRNA2T00072614001,GSBRNA2T00069393001,GSBRNA2T00116809001,GSBRNA2T00155189001,GSBRNA2T00012577001,GSBRNA2T00123351001
Biological process	maturation of LSU-rRNA	GO:0000470	0.000834727	3.07846	GSBRNA2T00089522001,GSBRNA2T00069132001,GSBRNA2T00101507001,GSBRNA2T00071658001,GSBRNA2T00151559001,GSBRNA2T00015957001,GSBRNA2T00138973001,GSBRNA2T00124761001,GSBRNA2T00094563001,GSBRNA2T00015612001,GSBRNA2T00067631001,GSBRNA2T00128368001,GSBRNA2T00096119001,GSBRNA2T00092631001,GSBRNA2T00080689001,GSBRNA2T00040686001,GSBRNA2T00125132001,GSBRNA2T00089702001,GSBRNA2T00128857001,GSBRNA2T00095477001…
Biological process	positive regulation of DNA-binding transcription factor activity	GO:0051091	0.00118076	2.92784	GSBRNA2T00126228001,GSBRNA2T00050878001,GSBRNA2T00126230001,GSBRNA2T00076523001,GSBRNA2T00058422001,GSBRNA2T00155923001
Biological process	organonitrogen compound metabolic process	GO:1901564	0.00118076	2.92784	GSBRNA2T00030878001,GSBRNA2T00018596001,GSBRNA2T00126717001,GSBRNA2T00025147001,GSBRNA2T00027617001,GSBRNA2T00065972001,GSBRNA2T00075176001,GSBRNA2T00057289001,GSBRNA2T00022179001,GSBRNA2T00085431001,GSBRNA2T00067501001,GSBRNA2T00131588001,GSBRNA2T00031973001,GSBRNA2T00139014001,GSBRNA2T00157100001,GSBRNA2T00136890001,GSBRNA2T00072668001,GSBRNA2T00016155001,GSBRNA2T00154963001,GSBRNA2T00002404001…
Biological process	phosphate ion transport	GO:0006817	0.00118076	2.92784	GSBRNA2T00064897001,GSBRNA2T00016532001,GSBRNA2T00055202001,GSBRNA2T00017654001,GSBRNA2T00116869001,GSBRNA2T00116867001,GSBRNA2T00090553001,GSBRNA2T00067777001,GSBRNA2T00005340001,GSBRNA2T00155254001,GSBRNA2T00017656001,GSBRNA2T00031583001,GSBRNA2T00030203001,GSBRNA2T00135625001,GSBRNA2T00081597001
Biological process	response to toxic substance	GO:0009636	0.00128684	2.89048	GSBRNA2T00077296001,GSBRNA2T00002404001,GSBRNA2T00054421001,GSBRNA2T00046820001,GSBRNA2T00002403001,GSBRNA2T00064141001,GSBRNA2T00074552001,GSBRNA2T00096592001,GSBRNA2T00092271001,GSBRNA2T00018439001,GSBRNA2T00047517001,GSBRNA2T00013915001,GSBRNA2T00043891001,GSBRNA2T00136178001,GSBRNA2T00084825001,GSBRNA2T00068642001,GSBRNA2T00067884001,GSBRNA2T00094622001,GSBRNA2T00043868001,GSBRNA2T00027608001…
Biological process	amide biosynthetic process	GO:0043604	0.00142813	2.84523	GSBRNA2T00103856001,GSBRNA2T00084825001,GSBRNA2T00150600001,GSBRNA2T00100017001,GSBRNA2T00059917001,GSBRNA2T00026609001,GSBRNA2T00143276001,GSBRNA2T00037097001,GSBRNA2T00058134001,GSBRNA2T00035095001,GSBRNA2T00117297001,GSBRNA2T00126199001,GSBRNA2T00130385001,GSBRNA2T00134679001,GSBRNA2T00043812001,GSBRNA2T00050072001,GSBRNA2T00096731001,GSBRNA2T00028133001,GSBRNA2T00109460001,GSBRNA2T00037113001…
Biological process	regulation of systemic acquired resistance	GO:0010112	0.00147405	2.83149	GSBRNA2T00085441001,GSBRNA2T00052436001,GSBRNA2T00030764001,GSBRNA2T00150459001,GSBRNA2T00108378001,GSBRNA2T00041671001,GSBRNA2T00078004001,GSBRNA2T00072247001
Biological process	proline metabolic process	GO:0006560	0.00149713	2.82474	GSBRNA2T00112701001,GSBRNA2T00017092001,GSBRNA2T00142964001,GSBRNA2T00008196001,GSBRNA2T00069393001,GSBRNA2T00033737001,GSBRNA2T00116809001,GSBRNA2T00155189001,GSBRNA2T00012577001,GSBRNA2T00123351001
Biological process	lipid localization	GO:0010876	0.00222075	2.6535	GSBRNA2T00069516001,GSBRNA2T00032396001,GSBRNA2T00108427001,GSBRNA2T00035511001,GSBRNA2T00090477001,GSBRNA2T00102035001,GSBRNA2T00066288001,GSBRNA2T00098298001,GSBRNA2T00084107001,GSBRNA2T00012648001,GSBRNA2T00058485001,GSBRNA2T00136303001,GSBRNA2T00106897001,GSBRNA2T00123995001,GSBRNA2T00103362001,GSBRNA2T00027223001,GSBRNA2T00053271001,GSBRNA2T00018767001,GSBRNA2T00063072001,GSBRNA2T00024762001…
Biological process	cell communication	GO:0007154	0.00223221	2.65127	GSBRNA2T00065972001,GSBRNA2T00131588001,GSBRNA2T00016155001,GSBRNA2T00155030001,GSBRNA2T00000028001,GSBRNA2T00043132001,GSBRNA2T00043131001,GSBRNA2T00078964001,GSBRNA2T00124463001,GSBRNA2T00016532001,GSBRNA2T00055202001,GSBRNA2T00056878001,GSBRNA2T00007063001,GSBRNA2T00017654001,GSBRNA2T00096206001,GSBRNA2T00057625001,GSBRNA2T00038175001,GSBRNA2T00038482001,GSBRNA2T00037741001,GSBRNA2T00090553001…
Biological process	enzyme linked receptor protein signaling pathway	GO:0007167	0.00230386	2.63754	GSBRNA2T00007063001,GSBRNA2T00047880001,GSBRNA2T00003508001,GSBRNA2T00046971001,GSBRNA2T00000709001,GSBRNA2T00046482001,GSBRNA2T00096609001,GSBRNA2T00046481001,GSBRNA2T00016777001,GSBRNA2T00049213001,GSBRNA2T00094461001,GSBRNA2T00002415001,GSBRNA2T00018576001,GSBRNA2T00124905001,GSBRNA2T00089499001,GSBRNA2T00024985001,GSBRNA2T00018425001,GSBRNA2T00081297001
Biological process	transmembrane receptor protein serine/threonine kinase signaling pathway	GO:0007178	0.00230386	2.63754	GSBRNA2T00007063001,GSBRNA2T00047880001,GSBRNA2T00003508001,GSBRNA2T00046971001,GSBRNA2T00000709001,GSBRNA2T00046482001,GSBRNA2T00096609001,GSBRNA2T00046481001,GSBRNA2T00016777001,GSBRNA2T00049213001,GSBRNA2T00094461001,GSBRNA2T00002415001,GSBRNA2T00018576001,GSBRNA2T00124905001,GSBRNA2T00089499001,GSBRNA2T00024985001,GSBRNA2T00018425001,GSBRNA2T00081297001
Biological process	response to oxygen-containing compound	GO:1901700	0.00309647	2.50913	GSBRNA2T00151456001,GSBRNA2T00038175001,GSBRNA2T00062162001,GSBRNA2T00057044001,GSBRNA2T00000642001,GSBRNA2T00076879001,GSBRNA2T00072318001,GSBRNA2T00043891001,GSBRNA2T00078688001,GSBRNA2T00014080001,GSBRNA2T00106932001,GSBRNA2T00067871001,GSBRNA2T00015198001,GSBRNA2T00008105001,GSBRNA2T00074154001,GSBRNA2T00028695001,GSBRNA2T00015754001,GSBRNA2T00067884001,GSBRNA2T00035595001,GSBRNA2T00047387001…
Biological process	cell wall macromolecule metabolic process	GO:0044036	0.0031667	2.49939	GSBRNA2T00018372001,GSBRNA2T00085431001,GSBRNA2T00150474001,GSBRNA2T00132371001,GSBRNA2T00108995001,GSBRNA2T00021983001,GSBRNA2T00107727001,GSBRNA2T00139059001,GSBRNA2T00045121001,GSBRNA2T00055196001,GSBRNA2T00079736001,GSBRNA2T00050295001,GSBRNA2T00024824001,GSBRNA2T00025836001,GSBRNA2T00139058001,GSBRNA2T00012796001,GSBRNA2T00073427001,GSBRNA2T00005788001,GSBRNA2T00040037001,GSBRNA2T00116244001…
Biological process	cleavage involved in rRNA processing	GO:0000469	0.00317422	2.49836	GSBRNA2T00058134001,GSBRNA2T00071658001,GSBRNA2T00015957001,GSBRNA2T00109037001,GSBRNA2T00012004001,GSBRNA2T00098603001,GSBRNA2T00067631001,GSBRNA2T00023066001,GSBRNA2T00124884001,GSBRNA2T00079190001,GSBRNA2T00066208001,GSBRNA2T00039067001,GSBRNA2T00032042001,GSBRNA2T00068544001,GSBRNA2T00013244001,GSBRNA2T00097839001,GSBRNA2T00083929001,GSBRNA2T00080832001
Biological process	carboxylic acid catabolic process	GO:0046395	0.00321014	2.49348	GSBRNA2T00030878001,GSBRNA2T00151456001,GSBRNA2T00090129001,GSBRNA2T00019407001,GSBRNA2T00112701001,GSBRNA2T00017092001,GSBRNA2T00142964001,GSBRNA2T00099968001,GSBRNA2T00008196001,GSBRNA2T00091375001,GSBRNA2T00078572001,GSBRNA2T00095662001,GSBRNA2T00000782001,GSBRNA2T00062544001,GSBRNA2T00126668001,GSBRNA2T00126538001,GSBRNA2T00060868001,GSBRNA2T00095389001,GSBRNA2T00022306001,GSBRNA2T00013025001…
Biological process	response to oxygen-containing compound	GO:1901700	0.0032199	2.49216	GSBRNA2T00052814001,GSBRNA2T00057044001,GSBRNA2T00015754001,GSBRNA2T00151456001,GSBRNA2T00014080001,GSBRNA2T00008105001,GSBRNA2T00038175001,GSBRNA2T00053036001,GSBRNA2T00044540001,GSBRNA2T00005444001,GSBRNA2T00044595001,GSBRNA2T00043891001,GSBRNA2T00055921001,GSBRNA2T00028695001,GSBRNA2T00000642001,GSBRNA2T00031675001,GSBRNA2T00072318001,GSBRNA2T00067871001,GSBRNA2T00005379001,GSBRNA2T00000858001…
Biological process	rhythmic process	GO:0048511	0.0032199	2.49216	GSBRNA2T00104806001,GSBRNA2T00089673001,GSBRNA2T00136088001,GSBRNA2T00129361001,GSBRNA2T00038197001,GSBRNA2T00074325001,GSBRNA2T00109234001,GSBRNA2T00000199001,GSBRNA2T00107144001,GSBRNA2T00111523001,GSBRNA2T00077301001,GSBRNA2T00141725001,GSBRNA2T00009593001,GSBRNA2T00032340001,GSBRNA2T00017195001,GSBRNA2T00027410001,GSBRNA2T00034255001,GSBRNA2T00134680001,GSBRNA2T00015763001,GSBRNA2T00116784001…
Biological process	proline catabolic process	GO:0006562	0.00329122	2.48264	GSBRNA2T00017092001,GSBRNA2T00112701001,GSBRNA2T00142964001,GSBRNA2T00082899001,GSBRNA2T00008196001,GSBRNA2T00059225001,GSBRNA2T00033737001
Biological process	regulation of DNA-binding transcription factor activity	GO:0051090	0.00336451	2.47308	GSBRNA2T00126228001,GSBRNA2T00050878001,GSBRNA2T00126230001,GSBRNA2T00076523001,GSBRNA2T00058422001,GSBRNA2T00155923001
Biological process	regulation of immune system process	GO:0002682	0.0034144	2.46669	GSBRNA2T00085441001,GSBRNA2T00052436001,GSBRNA2T00030764001,GSBRNA2T00150459001,GSBRNA2T00108378001,GSBRNA2T00041671001,GSBRNA2T00078004001,GSBRNA2T00072247001,GSBRNA2T00075446001,GSBRNA2T00156999001,GSBRNA2T00106932001,GSBRNA2T00106920001,GSBRNA2T00050851001,GSBRNA2T00098811001,GSBRNA2T00136288001,GSBRNA2T00134370001,GSBRNA2T00004969001,GSBRNA2T00031368001
Biological process	regulation of photosynthesis, light reaction	GO:0042548	0.0034144	2.46669	GSBRNA2T00048562001,GSBRNA2T00032049001,GSBRNA2T00016389001,GSBRNA2T00081678001,GSBRNA2T00054097001,GSBRNA2T00097862001,GSBRNA2T00046185001,GSBRNA2T00134966001,GSBRNA2T00005668001
Biological process	cellular protein metabolic process	GO:0044267	0.0034144	2.46669	GSBRNA2T00096206001,GSBRNA2T00016155001,GSBRNA2T00045438001,GSBRNA2T00147022001,GSBRNA2T00072665001,GSBRNA2T00126717001,GSBRNA2T00136819001,GSBRNA2T00149066001,GSBRNA2T00065972001,GSBRNA2T00074574001,GSBRNA2T00153605001,GSBRNA2T00005351001,GSBRNA2T00048757001,GSBRNA2T00155769001,GSBRNA2T00136175001,GSBRNA2T00033032001,GSBRNA2T00140836001,GSBRNA2T00107067001,GSBRNA2T00029767001,GSBRNA2T00157100001…
Biological process	photosystem II stabilization	GO:0042549	0.0034144	2.46669	GSBRNA2T00048562001,GSBRNA2T00032049001,GSBRNA2T00016389001,GSBRNA2T00081678001,GSBRNA2T00054097001,GSBRNA2T00097862001,GSBRNA2T00046185001,GSBRNA2T00134966001,GSBRNA2T00005668001
Biological process	regulation of immune response	GO:0050776	0.0034144	2.46669	GSBRNA2T00085441001,GSBRNA2T00052436001,GSBRNA2T00030764001,GSBRNA2T00150459001,GSBRNA2T00108378001,GSBRNA2T00041671001,GSBRNA2T00078004001,GSBRNA2T00072247001,GSBRNA2T00075446001,GSBRNA2T00156999001,GSBRNA2T00106932001,GSBRNA2T00106920001,GSBRNA2T00050851001,GSBRNA2T00098811001,GSBRNA2T00136288001,GSBRNA2T00134370001,GSBRNA2T00004969001,GSBRNA2T00031368001
Biological process	regulation of response to external stimulus	GO:0032101	0.0034144	2.46669	GSBRNA2T00085441001,GSBRNA2T00052436001,GSBRNA2T00030764001,GSBRNA2T00150459001,GSBRNA2T00108378001,GSBRNA2T00041671001,GSBRNA2T00078004001,GSBRNA2T00072247001,GSBRNA2T00075446001,GSBRNA2T00156999001,GSBRNA2T00106932001,GSBRNA2T00106920001,GSBRNA2T00050851001,GSBRNA2T00098811001,GSBRNA2T00136288001,GSBRNA2T00134370001,GSBRNA2T00004969001,GSBRNA2T00031368001
Biological process	regulation of generation of precursor metabolites and energy	GO:0043467	0.0034144	2.46669	GSBRNA2T00048562001,GSBRNA2T00032049001,GSBRNA2T00016389001,GSBRNA2T00081678001,GSBRNA2T00054097001,GSBRNA2T00097862001,GSBRNA2T00046185001,GSBRNA2T00134966001,GSBRNA2T00005668001
Biological process	regulation of response to biotic stimulus	GO:0002831	0.0034144	2.46669	GSBRNA2T00085441001,GSBRNA2T00052436001,GSBRNA2T00030764001,GSBRNA2T00150459001,GSBRNA2T00108378001,GSBRNA2T00041671001,GSBRNA2T00078004001,GSBRNA2T00072247001,GSBRNA2T00075446001,GSBRNA2T00156999001,GSBRNA2T00106932001,GSBRNA2T00106920001,GSBRNA2T00050851001,GSBRNA2T00098811001,GSBRNA2T00136288001,GSBRNA2T00134370001,GSBRNA2T00004969001,GSBRNA2T00031368001
Biological process	response to hydrogen peroxide	GO:0042542	0.00344909	2.4623	GSBRNA2T00106932001,GSBRNA2T00050618001,GSBRNA2T00069948001,GSBRNA2T00082070001,GSBRNA2T00010517001,GSBRNA2T00010518001,GSBRNA2T00029992001,GSBRNA2T00003270001,GSBRNA2T00033887001
Biological process	organic acid catabolic process	GO:0016054	0.00344909	2.4623	GSBRNA2T00030878001,GSBRNA2T00151456001,GSBRNA2T00090129001,GSBRNA2T00019407001,GSBRNA2T00112701001,GSBRNA2T00017092001,GSBRNA2T00142964001,GSBRNA2T00099968001,GSBRNA2T00008196001,GSBRNA2T00091375001,GSBRNA2T00078572001,GSBRNA2T00095662001,GSBRNA2T00000782001,GSBRNA2T00062544001,GSBRNA2T00126668001,GSBRNA2T00126538001,GSBRNA2T00060868001,GSBRNA2T00095389001,GSBRNA2T00022306001,GSBRNA2T00013025001…
Biological process	defense response to oomycetes	GO:0002229	0.00400487	2.39741	GSBRNA2T00151456001,GSBRNA2T00007063001,GSBRNA2T00047880001,GSBRNA2T00003508001,GSBRNA2T00046971001,GSBRNA2T00000709001,GSBRNA2T00046482001,GSBRNA2T00096609001,GSBRNA2T00046481001,GSBRNA2T00016777001,GSBRNA2T00049213001,GSBRNA2T00094461001,GSBRNA2T00002415001,GSBRNA2T00018576001,GSBRNA2T00124905001,GSBRNA2T00024985001,GSBRNA2T00018425001
Biological process	response to oomycetes	GO:0002239	0.00453276	2.34364	GSBRNA2T00151456001,GSBRNA2T00007063001,GSBRNA2T00047880001,GSBRNA2T00003508001,GSBRNA2T00046971001,GSBRNA2T00000709001,GSBRNA2T00046482001,GSBRNA2T00096609001,GSBRNA2T00046481001,GSBRNA2T00016777001,GSBRNA2T00049213001,GSBRNA2T00094461001,GSBRNA2T00002415001,GSBRNA2T00018576001,GSBRNA2T00124905001,GSBRNA2T00024985001,GSBRNA2T00018425001
Biological process	maturation of SSU-rRNA from tricistronic rRNA transcript (SSU-rRNA, 5.8S rRNA, LSU-rRNA)	GO:0000462	0.00495641	2.30483	GSBRNA2T00058134001,GSBRNA2T00072919001,GSBRNA2T00011771001,GSBRNA2T00109037001,GSBRNA2T00027066001,GSBRNA2T00012004001,GSBRNA2T00000386001,GSBRNA2T00005101001,GSBRNA2T00075645001,GSBRNA2T00061355001,GSBRNA2T00030702001,GSBRNA2T00124884001,GSBRNA2T00079190001,GSBRNA2T00015320001,GSBRNA2T00068219001,GSBRNA2T00032621001,GSBRNA2T00039067001,GSBRNA2T00032042001,GSBRNA2T00104569001,GSBRNA2T00079753001…
Biological process	response to acid chemical	GO:0001101	0.00497182	2.30348	GSBRNA2T00038175001,GSBRNA2T00137461001,GSBRNA2T00085342001,GSBRNA2T00063605001,GSBRNA2T00045156001,GSBRNA2T00092007001,GSBRNA2T00101445001,GSBRNA2T00119539001,GSBRNA2T00103742001,GSBRNA2T00146637001,GSBRNA2T00050633001,GSBRNA2T00047743001,GSBRNA2T00098348001,GSBRNA2T00112350001,GSBRNA2T00056090001,GSBRNA2T00034514001,GSBRNA2T00007883001,GSBRNA2T00005977001,GSBRNA2T00134984001,GSBRNA2T00050955001
Biological process	defense response	GO:0006952	0.00502824	2.29858	GSBRNA2T00083918001,GSBRNA2T00047460001,GSBRNA2T00079053001,GSBRNA2T00025057001,GSBRNA2T00087396001,GSBRNA2T00020919001,GSBRNA2T00035090001,GSBRNA2T00022510001,GSBRNA2T00122710001,GSBRNA2T00000028001,GSBRNA2T00007063001,GSBRNA2T00012995001,GSBRNA2T00085441001,GSBRNA2T00071551001,GSBRNA2T00123404001,GSBRNA2T00035567001,GSBRNA2T00052436001,GSBRNA2T00151456001,GSBRNA2T00030764001,GSBRNA2T00016159001…
Biological process	rRNA modification	GO:0000154	0.00520574	2.28352	GSBRNA2T00069132001,GSBRNA2T00010279001,GSBRNA2T00015710001,GSBRNA2T00071658001,GSBRNA2T00015345001,GSBRNA2T00006801001,GSBRNA2T00050753001,GSBRNA2T00015957001,GSBRNA2T00055310001,GSBRNA2T00003006001,GSBRNA2T00065564001,GSBRNA2T00028795001,GSBRNA2T00067631001,GSBRNA2T00096119001,GSBRNA2T00085920001,GSBRNA2T00154550001,GSBRNA2T00040686001,GSBRNA2T00006912001,GSBRNA2T00060711001,GSBRNA2T00095477001…
Biological process	cellular glucan metabolic process	GO:0006073	0.00535587	2.27117	GSBRNA2T00107727001,GSBRNA2T00055196001,GSBRNA2T00064952001,GSBRNA2T00012796001,GSBRNA2T00116244001,GSBRNA2T00000687001,GSBRNA2T00082361001,GSBRNA2T00015103001,GSBRNA2T00084824001,GSBRNA2T00125592001,GSBRNA2T00151626001,GSBRNA2T00034700001,GSBRNA2T00105320001,GSBRNA2T00019792001,GSBRNA2T00012797001,GSBRNA2T00067401001,GSBRNA2T00034024001,GSBRNA2T00034702001,GSBRNA2T00011419001,GSBRNA2T00141236001…
Biological process	rRNA pseudouridine synthesis	GO:0031118	0.00539222	2.26823	GSBRNA2T00010279001,GSBRNA2T00071658001,GSBRNA2T00015345001,GSBRNA2T00050753001,GSBRNA2T00015957001,GSBRNA2T00055310001,GSBRNA2T00003006001,GSBRNA2T00067631001,GSBRNA2T00029343001,GSBRNA2T00016103001
Biological process	phosphate ion transmembrane transport	GO:0035435	0.00552639	2.25756	GSBRNA2T00064897001,GSBRNA2T00016532001,GSBRNA2T00055202001,GSBRNA2T00017654001,GSBRNA2T00090553001,GSBRNA2T00067777001,GSBRNA2T00017656001,GSBRNA2T00031583001,GSBRNA2T00030203001,GSBRNA2T00135625001,GSBRNA2T00081597001
Biological process	glutamine family amino acid catabolic process	GO:0009065	0.00552639	2.25756	GSBRNA2T00030878001,GSBRNA2T00090129001,GSBRNA2T00019407001,GSBRNA2T00112701001,GSBRNA2T00017092001,GSBRNA2T00142964001,GSBRNA2T00008196001,GSBRNA2T00078572001,GSBRNA2T00095662001,GSBRNA2T00126668001,GSBRNA2T00033737001
Biological process	regulation of response to stress	GO:0080134	0.00552639	2.25756	GSBRNA2T00052436001,GSBRNA2T00041671001,GSBRNA2T00078004001,GSBRNA2T00117885001,GSBRNA2T00030764001,GSBRNA2T00006396001,GSBRNA2T00150459001,GSBRNA2T00085441001,GSBRNA2T00072318001,GSBRNA2T00108378001,GSBRNA2T00106932001,GSBRNA2T00139219001,GSBRNA2T00072247001,GSBRNA2T00106920001,GSBRNA2T00035595001,GSBRNA2T00156999001,GSBRNA2T00136288001,GSBRNA2T00011092001,GSBRNA2T00112220001,GSBRNA2T00028451001…
Biological process	regulation of response to stimulus	GO:0048583	0.00590901	2.22849	GSBRNA2T00052436001,GSBRNA2T00041671001,GSBRNA2T00078004001,GSBRNA2T00117885001,GSBRNA2T00030764001,GSBRNA2T00006396001,GSBRNA2T00150459001,GSBRNA2T00085441001,GSBRNA2T00121396001,GSBRNA2T00072318001,GSBRNA2T00108378001,GSBRNA2T00106932001,GSBRNA2T00139219001,GSBRNA2T00064711001,GSBRNA2T00067871001,GSBRNA2T00072247001,GSBRNA2T00106920001,GSBRNA2T00130922001,GSBRNA2T00035595001,GSBRNA2T00156999001…
Biological process	glucan biosynthetic process	GO:0009250	0.00684281	2.16477	GSBRNA2T00055196001,GSBRNA2T00125592001,GSBRNA2T00034700001,GSBRNA2T00019792001,GSBRNA2T00034702001,GSBRNA2T00141236001,GSBRNA2T00004763001,GSBRNA2T00143152001,GSBRNA2T00032479001,GSBRNA2T00004966001,GSBRNA2T00141874001,GSBRNA2T00043860001,GSBRNA2T00014452001,GSBRNA2T00090192001,GSBRNA2T00143181001,GSBRNA2T00130184001,GSBRNA2T00087409001,GSBRNA2T00087081001,GSBRNA2T00083526001,GSBRNA2T00043725001…
Biological process	generation of precursor metabolites and energy	GO:0006091	0.00697886	2.15622	GSBRNA2T00001302001,GSBRNA2T00073230001,GSBRNA2T00093659001,GSBRNA2T00053597001,GSBRNA2T00140330001,GSBRNA2T00045644001,GSBRNA2T00138559001,GSBRNA2T00129921001,GSBRNA2T00078888001,GSBRNA2T00018397001,GSBRNA2T00005208001,GSBRNA2T00054181001,GSBRNA2T00012859001,GSBRNA2T00090299001,GSBRNA2T00033137001,GSBRNA2T00047139001,GSBRNA2T00047586001,GSBRNA2T00087739001,GSBRNA2T00070693001,GSBRNA2T00126048001…
Biological process	phosphate ion transport	GO:0006817	0.00725466	2.13938	GSBRNA2T00064897001,GSBRNA2T00116867001,GSBRNA2T00116869001,GSBRNA2T00155254001,GSBRNA2T00055202001,GSBRNA2T00005340001,GSBRNA2T00017654001,GSBRNA2T00016532001,GSBRNA2T00067777001,GSBRNA2T00090553001,GSBRNA2T00127685001,GSBRNA2T00066303001,GSBRNA2T00062899001,GSBRNA2T00135625001,GSBRNA2T00031583001,GSBRNA2T00001126001,GSBRNA2T00055199001,GSBRNA2T00071979001,GSBRNA2T00081597001
Biological process	response to water	GO:0009415	0.00725466	2.13938	GSBRNA2T00038175001,GSBRNA2T00137461001,GSBRNA2T00085342001,GSBRNA2T00045156001,GSBRNA2T00092007001,GSBRNA2T00101445001,GSBRNA2T00119539001,GSBRNA2T00103742001,GSBRNA2T00146637001,GSBRNA2T00050633001,GSBRNA2T00047743001,GSBRNA2T00098348001,GSBRNA2T00112350001,GSBRNA2T00056090001,GSBRNA2T00034514001,GSBRNA2T00007883001,GSBRNA2T00005977001,GSBRNA2T00134984001,GSBRNA2T00050955001
Biological process	glycogen biosynthetic process	GO:0005978	0.00772962	2.11184	GSBRNA2T00014452001,GSBRNA2T00043725001,GSBRNA2T00077208001,GSBRNA2T00144434001,GSBRNA2T00110776001,GSBRNA2T00141135001,GSBRNA2T00038740001,GSBRNA2T00117069001,GSBRNA2T00100304001,GSBRNA2T00020056001
Biological process	cellular polysaccharide metabolic process	GO:0044264	0.00782185	2.10669	GSBRNA2T00018372001,GSBRNA2T00107727001,GSBRNA2T00055196001,GSBRNA2T00064952001,GSBRNA2T00012796001,GSBRNA2T00005788001,GSBRNA2T00040037001,GSBRNA2T00116244001,GSBRNA2T00000687001,GSBRNA2T00082361001,GSBRNA2T00086247001,GSBRNA2T00015103001,GSBRNA2T00084824001,GSBRNA2T00125592001,GSBRNA2T00151626001,GSBRNA2T00034700001,GSBRNA2T00105320001,GSBRNA2T00019792001,GSBRNA2T00047484001,GSBRNA2T00012797001…
Biological process	glucan metabolic process	GO:0044042	0.00805307	2.09404	GSBRNA2T00107727001,GSBRNA2T00055196001,GSBRNA2T00064952001,GSBRNA2T00012796001,GSBRNA2T00116244001,GSBRNA2T00000687001,GSBRNA2T00082361001,GSBRNA2T00015103001,GSBRNA2T00084824001,GSBRNA2T00125592001,GSBRNA2T00151626001,GSBRNA2T00034700001,GSBRNA2T00105320001,GSBRNA2T00019792001,GSBRNA2T00012797001,GSBRNA2T00067401001,GSBRNA2T00034024001,GSBRNA2T00034702001,GSBRNA2T00011419001,GSBRNA2T00141236001…
Biological process	succinyl-CoA metabolic process	GO:0006104	0.00851715	2.06971	GSBRNA2T00056438001,GSBRNA2T00032774001,GSBRNA2T00050760001
Biological process	inositol biosynthetic process	GO:0006021	0.00999664	2.00015	GSBRNA2T00003857001,GSBRNA2T00149699001,GSBRNA2T00032843001,GSBRNA2T00127475001,GSBRNA2T00131240001,GSBRNA2T00078209001,GSBRNA2T00069156001
Biological process	protein complex oligomerization	GO:0051259	0.0108072	1.96629	GSBRNA2T00057327001,GSBRNA2T00069948001,GSBRNA2T00082070001,GSBRNA2T00010517001,GSBRNA2T00010518001,GSBRNA2T00029992001,GSBRNA2T00003270001,GSBRNA2T00033887001
Biological process	response to stimulus	GO:0050896	0.0109517	1.96052	GSBRNA2T00087396001,GSBRNA2T00018596001,GSBRNA2T00106839001,GSBRNA2T00083918001,GSBRNA2T00022510001,GSBRNA2T00157016001,GSBRNA2T00075176001,GSBRNA2T00035567001,GSBRNA2T00077296001,GSBRNA2T00016155001,GSBRNA2T00155030001,GSBRNA2T00008668001,GSBRNA2T00002404001,GSBRNA2T00054421001,GSBRNA2T00000028001,GSBRNA2T00043132001,GSBRNA2T00072346001,GSBRNA2T00151456001,GSBRNA2T00043131001,GSBRNA2T00035570001…
Biological process	division septum assembly	GO:0000917	0.011466	1.94059	GSBRNA2T00053207001,GSBRNA2T00077406001,GSBRNA2T00149820001,GSBRNA2T00032932001,GSBRNA2T00101953001,GSBRNA2T00142895001,GSBRNA2T00071968001,GSBRNA2T00104098001
Biological process	cell septum assembly	GO:0090529	0.011466	1.94059	GSBRNA2T00053207001,GSBRNA2T00077406001,GSBRNA2T00149820001,GSBRNA2T00032932001,GSBRNA2T00101953001,GSBRNA2T00142895001,GSBRNA2T00071968001,GSBRNA2T00104098001
Biological process	cytokinetic process	GO:0032506	0.011466	1.94059	GSBRNA2T00053207001,GSBRNA2T00077406001,GSBRNA2T00149820001,GSBRNA2T00032932001,GSBRNA2T00101953001,GSBRNA2T00142895001,GSBRNA2T00071968001,GSBRNA2T00104098001
Biological process	detoxification	GO:0098754	0.0115845	1.93612	GSBRNA2T00077296001,GSBRNA2T00054421001,GSBRNA2T00064141001,GSBRNA2T00074552001,GSBRNA2T00092271001,GSBRNA2T00047517001,GSBRNA2T00013915001,GSBRNA2T00043891001,GSBRNA2T00136178001,GSBRNA2T00084825001,GSBRNA2T00068642001,GSBRNA2T00067884001,GSBRNA2T00094622001,GSBRNA2T00043868001,GSBRNA2T00027608001,GSBRNA2T00019388001,GSBRNA2T00081296001,GSBRNA2T00001358001,GSBRNA2T00000056001,GSBRNA2T00059082001…
Biological process	starch biosynthetic process	GO:0019252	0.0118762	1.92532	GSBRNA2T00019792001,GSBRNA2T00014452001,GSBRNA2T00087409001,GSBRNA2T00043725001,GSBRNA2T00091167001,GSBRNA2T00077208001,GSBRNA2T00144434001,GSBRNA2T00110776001,GSBRNA2T00147519001,GSBRNA2T00020677001,GSBRNA2T00093825001,GSBRNA2T00038740001,GSBRNA2T00015165001,GSBRNA2T00057206001,GSBRNA2T00100304001,GSBRNA2T00020056001
Biological process	response to UV-B	GO:0010224	0.0119721	1.92183	GSBRNA2T00094752001,GSBRNA2T00085737001,GSBRNA2T00134664001,GSBRNA2T00028065001,GSBRNA2T00047537001
Biological process	proline catabolic process	GO:0006562	0.0119721	1.92183	GSBRNA2T00112701001,GSBRNA2T00017092001,GSBRNA2T00142964001,GSBRNA2T00008196001,GSBRNA2T00033737001
Biological process	glycosyl compound catabolic process	GO:1901658	0.0120334	1.91961	GSBRNA2T00002171001,GSBRNA2T00023076001,GSBRNA2T00087922001,GSBRNA2T00075176001,GSBRNA2T00045180001,GSBRNA2T00087923001,GSBRNA2T00031799001,GSBRNA2T00022049001,GSBRNA2T00057772001,GSBRNA2T00089722001,GSBRNA2T00045177001,GSBRNA2T00023459001,GSBRNA2T00007249001,GSBRNA2T00061152001,GSBRNA2T00006457001,GSBRNA2T00024146001,GSBRNA2T00094059001,GSBRNA2T00087932001,GSBRNA2T00069089001,GSBRNA2T00008244001…
Biological process	acidic amino acid transport	GO:0015800	0.0120807	1.91791	GSBRNA2T00023649001,GSBRNA2T00001912001,GSBRNA2T00076991001,GSBRNA2T00069601001,GSBRNA2T00042490001,GSBRNA2T00086197001
Biological process	pseudouridine synthesis	GO:0001522	0.0142909	1.84494	GSBRNA2T00010279001,GSBRNA2T00071658001,GSBRNA2T00015345001,GSBRNA2T00050753001,GSBRNA2T00015957001,GSBRNA2T00140681001,GSBRNA2T00098853001,GSBRNA2T00103732001,GSBRNA2T00055310001,GSBRNA2T00003006001,GSBRNA2T00114774001,GSBRNA2T00146645001,GSBRNA2T00067631001,GSBRNA2T00150361001,GSBRNA2T00029343001,GSBRNA2T00016103001,GSBRNA2T00040910001,GSBRNA2T00029724001,GSBRNA2T00118455001
Biological process	endonucleolytic cleavage of tricistronic rRNA transcript (SSU-rRNA, 5.8S rRNA, LSU-rRNA)	GO:0000479	0.0144905	1.83892	GSBRNA2T00058134001,GSBRNA2T00109037001,GSBRNA2T00012004001,GSBRNA2T00023066001,GSBRNA2T00124884001,GSBRNA2T00079190001,GSBRNA2T00039067001,GSBRNA2T00032042001,GSBRNA2T00013244001,GSBRNA2T00097839001
Biological process	endonucleolytic cleavage involved in rRNA processing	GO:0000478	0.0144905	1.83892	GSBRNA2T00058134001,GSBRNA2T00109037001,GSBRNA2T00012004001,GSBRNA2T00023066001,GSBRNA2T00124884001,GSBRNA2T00079190001,GSBRNA2T00039067001,GSBRNA2T00032042001,GSBRNA2T00013244001,GSBRNA2T00097839001
Biological process	L-lysine metabolic process	GO:0046440	0.0149859	1.82432	GSBRNA2T00062544001,GSBRNA2T00060868001,GSBRNA2T00095389001,GSBRNA2T00013025001
Biological process	L-lysine catabolic process to acetyl-CoA	GO:0019474	0.0149859	1.82432	GSBRNA2T00062544001,GSBRNA2T00060868001,GSBRNA2T00095389001,GSBRNA2T00013025001
Biological process	L-lysine catabolic process	GO:0019477	0.0149859	1.82432	GSBRNA2T00062544001,GSBRNA2T00060868001,GSBRNA2T00095389001,GSBRNA2T00013025001
Biological process	lysine catabolic process	GO:0006554	0.0149859	1.82432	GSBRNA2T00062544001,GSBRNA2T00060868001,GSBRNA2T00095389001,GSBRNA2T00013025001
Biological process	pyridine-containing compound biosynthetic process	GO:0072525	0.0149859	1.82432	GSBRNA2T00135568001,GSBRNA2T00031639001,GSBRNA2T00083228001,GSBRNA2T00040751001,GSBRNA2T00122385001,GSBRNA2T00054466001,GSBRNA2T00047855001,GSBRNA2T00133077001,GSBRNA2T00034275001,GSBRNA2T00037251001,GSBRNA2T00010044001
Biological process	L-lysine catabolic process to acetyl-CoA via saccharopine	GO:0033512	0.0149859	1.82432	GSBRNA2T00062544001,GSBRNA2T00060868001,GSBRNA2T00095389001,GSBRNA2T00013025001
Biological process	S-glycoside catabolic process	GO:0016145	0.0157571	1.80252	GSBRNA2T00002171001,GSBRNA2T00023076001,GSBRNA2T00087922001,GSBRNA2T00075176001,GSBRNA2T00045180001,GSBRNA2T00087923001,GSBRNA2T00022049001,GSBRNA2T00045177001,GSBRNA2T00007249001,GSBRNA2T00061152001,GSBRNA2T00006457001,GSBRNA2T00024146001,GSBRNA2T00094059001,GSBRNA2T00087932001,GSBRNA2T00069089001,GSBRNA2T00008244001,GSBRNA2T00022046001
Biological process	glycosinolate catabolic process	GO:0019759	0.0157571	1.80252	GSBRNA2T00002171001,GSBRNA2T00023076001,GSBRNA2T00087922001,GSBRNA2T00075176001,GSBRNA2T00045180001,GSBRNA2T00087923001,GSBRNA2T00022049001,GSBRNA2T00045177001,GSBRNA2T00007249001,GSBRNA2T00061152001,GSBRNA2T00006457001,GSBRNA2T00024146001,GSBRNA2T00094059001,GSBRNA2T00087932001,GSBRNA2T00069089001,GSBRNA2T00008244001,GSBRNA2T00022046001
Biological process	glucosinolate catabolic process	GO:0019762	0.0157571	1.80252	GSBRNA2T00002171001,GSBRNA2T00023076001,GSBRNA2T00087922001,GSBRNA2T00075176001,GSBRNA2T00045180001,GSBRNA2T00087923001,GSBRNA2T00022049001,GSBRNA2T00045177001,GSBRNA2T00007249001,GSBRNA2T00061152001,GSBRNA2T00006457001,GSBRNA2T00024146001,GSBRNA2T00094059001,GSBRNA2T00087932001,GSBRNA2T00069089001,GSBRNA2T00008244001,GSBRNA2T00022046001
Biological process	organic hydroxy compound biosynthetic process	GO:1901617	0.0157571	1.80252	GSBRNA2T00111327001,GSBRNA2T00070338001,GSBRNA2T00079794001,GSBRNA2T00027986001,GSBRNA2T00028821001,GSBRNA2T00021689001,GSBRNA2T00086715001,GSBRNA2T00022317001,GSBRNA2T00144606001,GSBRNA2T00022402001,GSBRNA2T00039970001,GSBRNA2T00076257001,GSBRNA2T00076632001,GSBRNA2T00151882001,GSBRNA2T00093712001,GSBRNA2T00093815001,GSBRNA2T00047855001,GSBRNA2T00005401001,GSBRNA2T00074088001,GSBRNA2T00031470001…
Biological process	multi-organism process	GO:0051704	0.0174745	1.7576	GSBRNA2T00065972001,GSBRNA2T00131588001,GSBRNA2T00078964001,GSBRNA2T00124463001,GSBRNA2T00102029001,GSBRNA2T00096206001,GSBRNA2T00057625001,GSBRNA2T00037741001,GSBRNA2T00015141001,GSBRNA2T00067500001,GSBRNA2T00105301001,GSBRNA2T00058352001,GSBRNA2T00124466001,GSBRNA2T00072180001,GSBRNA2T00117283001,GSBRNA2T00092243001,GSBRNA2T00087669001,GSBRNA2T00037742001,GSBRNA2T00105297001,GSBRNA2T00008887001…
Biological process	phosphate ion transmembrane transport	GO:0035435	0.018064	1.74319	GSBRNA2T00064897001,GSBRNA2T00055202001,GSBRNA2T00017654001,GSBRNA2T00016532001,GSBRNA2T00067777001,GSBRNA2T00090553001,GSBRNA2T00066303001,GSBRNA2T00062899001,GSBRNA2T00135625001,GSBRNA2T00031583001,GSBRNA2T00001126001,GSBRNA2T00055199001,GSBRNA2T00071979001,GSBRNA2T00081597001
Biological process	response to reactive oxygen species	GO:0000302	0.0187545	1.7269	GSBRNA2T00106932001,GSBRNA2T00019388001,GSBRNA2T00059511001,GSBRNA2T00038960001,GSBRNA2T00082686001,GSBRNA2T00050618001,GSBRNA2T00069948001,GSBRNA2T00082070001,GSBRNA2T00010517001,GSBRNA2T00010518001,GSBRNA2T00068633001,GSBRNA2T00029992001,GSBRNA2T00049014001,GSBRNA2T00003270001,GSBRNA2T00033887001
Biological process	transition metal ion homeostasis	GO:0055076	0.0190447	1.72023	GSBRNA2T00048932001,GSBRNA2T00043138001,GSBRNA2T00112293001,GSBRNA2T00021000001,GSBRNA2T00049208001,GSBRNA2T00134135001,GSBRNA2T00053248001,GSBRNA2T00082945001,GSBRNA2T00050808001,GSBRNA2T00080645001,GSBRNA2T00008520001,GSBRNA2T00098788001,GSBRNA2T00012413001,GSBRNA2T00081350001,GSBRNA2T00156001001,GSBRNA2T00147516001,GSBRNA2T00005780001,GSBRNA2T00070478001,GSBRNA2T00079440001,GSBRNA2T00133500001…
Biological process	response to topologically incorrect protein	GO:0035966	0.0193219	1.71395	GSBRNA2T00019355001,GSBRNA2T00069552001,GSBRNA2T00142479001,GSBRNA2T00001236001,GSBRNA2T00037387001,GSBRNA2T00021042001,GSBRNA2T00072864001,GSBRNA2T00085735001,GSBRNA2T00019733001,GSBRNA2T00080816001,GSBRNA2T00044351001,GSBRNA2T00096953001,GSBRNA2T00061266001,GSBRNA2T00096278001,GSBRNA2T00007549001,GSBRNA2T00057933001,GSBRNA2T00054203001
Biological process	cellular response to topologically incorrect protein	GO:0035967	0.0193219	1.71395	GSBRNA2T00019355001,GSBRNA2T00069552001,GSBRNA2T00142479001,GSBRNA2T00001236001,GSBRNA2T00037387001,GSBRNA2T00021042001,GSBRNA2T00072864001,GSBRNA2T00085735001,GSBRNA2T00019733001,GSBRNA2T00080816001,GSBRNA2T00044351001,GSBRNA2T00096953001,GSBRNA2T00061266001,GSBRNA2T00096278001,GSBRNA2T00007549001,GSBRNA2T00057933001,GSBRNA2T00054203001
Biological process	glutamine family amino acid metabolic process	GO:0009064	0.0193219	1.71395	GSBRNA2T00030878001,GSBRNA2T00090129001,GSBRNA2T00019407001,GSBRNA2T00112701001,GSBRNA2T00117762001,GSBRNA2T00017092001,GSBRNA2T00114519001,GSBRNA2T00065379001,GSBRNA2T00112825001,GSBRNA2T00142964001,GSBRNA2T00008196001,GSBRNA2T00017125001,GSBRNA2T00021803001,GSBRNA2T00143205001,GSBRNA2T00135415001,GSBRNA2T00078572001,GSBRNA2T00095662001,GSBRNA2T00126668001,GSBRNA2T00039914001,GSBRNA2T00026653001…
Biological process	protein localization to plasma membrane	GO:0072659	0.0195621	1.70858	GSBRNA2T00074172001,GSBRNA2T00047462001,GSBRNA2T00079228001,GSBRNA2T00132259001,GSBRNA2T00015661001,GSBRNA2T00094473001
Biological process	protein localization to cell periphery	GO:1990778	0.0195621	1.70858	GSBRNA2T00074172001,GSBRNA2T00047462001,GSBRNA2T00079228001,GSBRNA2T00132259001,GSBRNA2T00015661001,GSBRNA2T00094473001
Biological process	response to oxidative stress	GO:0006979	0.0200952	1.69691	GSBRNA2T00054421001,GSBRNA2T00068642001,GSBRNA2T00106935001,GSBRNA2T00074552001,GSBRNA2T00077296001,GSBRNA2T00136273001,GSBRNA2T00137271001,GSBRNA2T00013915001,GSBRNA2T00092271001,GSBRNA2T00136178001,GSBRNA2T00131028001,GSBRNA2T00131144001,GSBRNA2T00064141001,GSBRNA2T00121586001,GSBRNA2T00027608001,GSBRNA2T00019388001,GSBRNA2T00040051001,GSBRNA2T00094622001,GSBRNA2T00081296001,GSBRNA2T00106932001…
Biological process	polysaccharide metabolic process	GO:0005976	0.0200952	1.69691	GSBRNA2T00045069001,GSBRNA2T00018372001,GSBRNA2T00138959001,GSBRNA2T00107727001,GSBRNA2T00055196001,GSBRNA2T00064952001,GSBRNA2T00101522001,GSBRNA2T00012796001,GSBRNA2T00019458001,GSBRNA2T00005788001,GSBRNA2T00040037001,GSBRNA2T00116244001,GSBRNA2T00149122001,GSBRNA2T00080410001,GSBRNA2T00000687001,GSBRNA2T00082361001,GSBRNA2T00027328001,GSBRNA2T00110362001,GSBRNA2T00086247001,GSBRNA2T00015103001…
Biological process	protein autoprocessing	GO:0016540	0.0209858	1.67807	GSBRNA2T00044716001,GSBRNA2T00010054001,GSBRNA2T00040192001,GSBRNA2T00149610001,GSBRNA2T00007675001,GSBRNA2T00065634001
Biological process	glycogen metabolic process	GO:0005977	0.021423	1.66912	GSBRNA2T00014452001,GSBRNA2T00043725001,GSBRNA2T00077208001,GSBRNA2T00144434001,GSBRNA2T00110776001,GSBRNA2T00141135001,GSBRNA2T00024311001,GSBRNA2T00038740001,GSBRNA2T00005768001,GSBRNA2T00117069001,GSBRNA2T00100304001,GSBRNA2T00020056001
Biological process	cellular carbohydrate metabolic process	GO:0044262	0.021423	1.66912	GSBRNA2T00018372001,GSBRNA2T00076499001,GSBRNA2T00107727001,GSBRNA2T00055196001,GSBRNA2T00064952001,GSBRNA2T00099581001,GSBRNA2T00070099001,GSBRNA2T00012796001,GSBRNA2T00034142001,GSBRNA2T00005788001,GSBRNA2T00040037001,GSBRNA2T00116244001,GSBRNA2T00015751001,GSBRNA2T00000687001,GSBRNA2T00082361001,GSBRNA2T00116170001,GSBRNA2T00086247001,GSBRNA2T00040075001,GSBRNA2T00029940001,GSBRNA2T00015103001…
Biological process	energy reserve metabolic process	GO:0006112	0.021423	1.66912	GSBRNA2T00014452001,GSBRNA2T00043725001,GSBRNA2T00077208001,GSBRNA2T00144434001,GSBRNA2T00110776001,GSBRNA2T00141135001,GSBRNA2T00024311001,GSBRNA2T00038740001,GSBRNA2T00005768001,GSBRNA2T00117069001,GSBRNA2T00100304001,GSBRNA2T00020056001
Biological process	photosystem II assembly	GO:0010207	0.021423	1.66912	GSBRNA2T00016389001,GSBRNA2T00005136001,GSBRNA2T00081678001,GSBRNA2T00023567001,GSBRNA2T00054097001,GSBRNA2T00097862001,GSBRNA2T00046185001,GSBRNA2T00134966001,GSBRNA2T00005668001
Biological process	cellular response to unfolded protein	GO:0034620	0.0219349	1.65887	GSBRNA2T00019355001,GSBRNA2T00069552001,GSBRNA2T00142479001,GSBRNA2T00037387001,GSBRNA2T00085735001,GSBRNA2T00019733001,GSBRNA2T00080816001,GSBRNA2T00096953001,GSBRNA2T00061266001,GSBRNA2T00096278001,GSBRNA2T00007549001,GSBRNA2T00057933001,GSBRNA2T00054203001
Biological process	response to unfolded protein	GO:0006986	0.0219349	1.65887	GSBRNA2T00019355001,GSBRNA2T00069552001,GSBRNA2T00142479001,GSBRNA2T00037387001,GSBRNA2T00085735001,GSBRNA2T00019733001,GSBRNA2T00080816001,GSBRNA2T00096953001,GSBRNA2T00061266001,GSBRNA2T00096278001,GSBRNA2T00007549001,GSBRNA2T00057933001,GSBRNA2T00054203001
Biological process	cellular transition metal ion homeostasis	GO:0046916	0.0223408	1.6509	GSBRNA2T00048932001,GSBRNA2T00043138001,GSBRNA2T00112293001,GSBRNA2T00021000001,GSBRNA2T00049208001,GSBRNA2T00134135001,GSBRNA2T00053248001,GSBRNA2T00082945001,GSBRNA2T00050808001,GSBRNA2T00080645001,GSBRNA2T00008520001,GSBRNA2T00098788001,GSBRNA2T00012413001,GSBRNA2T00081350001,GSBRNA2T00156001001,GSBRNA2T00147516001,GSBRNA2T00005780001,GSBRNA2T00133500001,GSBRNA2T00149410001,GSBRNA2T00006269001
Biological process	negative regulation of reductive pentose-phosphate cycle	GO:0080153	0.0223408	1.6509	GSBRNA2T00003358001,GSBRNA2T00038154001,GSBRNA2T00049485001,GSBRNA2T00028976001
Biological process	regulation of reductive pentose-phosphate cycle	GO:0080152	0.0223408	1.6509	GSBRNA2T00003358001,GSBRNA2T00038154001,GSBRNA2T00049485001,GSBRNA2T00028976001
Biological process	regulation of photosynthesis, dark reaction	GO:0010110	0.0223408	1.6509	GSBRNA2T00003358001,GSBRNA2T00038154001,GSBRNA2T00049485001,GSBRNA2T00028976001
Biological process	response to alcohol	GO:0097305	0.0223408	1.6509	GSBRNA2T00014080001,GSBRNA2T00008105001,GSBRNA2T00038175001,GSBRNA2T00028695001,GSBRNA2T00005379001,GSBRNA2T00000858001,GSBRNA2T00124863001,GSBRNA2T00137461001,GSBRNA2T00023687001,GSBRNA2T00033895001,GSBRNA2T00119540001,GSBRNA2T00001878001,GSBRNA2T00153082001,GSBRNA2T00119539001,GSBRNA2T00036896001,GSBRNA2T00050633001,GSBRNA2T00064422001,GSBRNA2T00047743001,GSBRNA2T00097285001,GSBRNA2T00117088001…
Biological process	snRNA modification	GO:0040031	0.0223408	1.6509	GSBRNA2T00071658001,GSBRNA2T00050753001,GSBRNA2T00015957001,GSBRNA2T00055310001,GSBRNA2T00067631001,GSBRNA2T00090863001,GSBRNA2T00029343001
Biological process	response to abscisic acid	GO:0009737	0.0223408	1.6509	GSBRNA2T00014080001,GSBRNA2T00008105001,GSBRNA2T00038175001,GSBRNA2T00028695001,GSBRNA2T00005379001,GSBRNA2T00000858001,GSBRNA2T00124863001,GSBRNA2T00137461001,GSBRNA2T00023687001,GSBRNA2T00033895001,GSBRNA2T00119540001,GSBRNA2T00001878001,GSBRNA2T00153082001,GSBRNA2T00119539001,GSBRNA2T00036896001,GSBRNA2T00050633001,GSBRNA2T00064422001,GSBRNA2T00047743001,GSBRNA2T00097285001,GSBRNA2T00117088001…
Biological process	negative regulation of photosynthesis	GO:1905156	0.0223408	1.6509	GSBRNA2T00003358001,GSBRNA2T00038154001,GSBRNA2T00049485001,GSBRNA2T00028976001
Biological process	oligosaccharide metabolic process	GO:0009311	0.0231786	1.63491	GSBRNA2T00055555001,GSBRNA2T00076499001,GSBRNA2T00099581001,GSBRNA2T00116170001,GSBRNA2T00131730001,GSBRNA2T00063644001,GSBRNA2T00039193001,GSBRNA2T00038035001,GSBRNA2T00017750001,GSBRNA2T00129795001,GSBRNA2T00081619001,GSBRNA2T00062437001,GSBRNA2T00140183001,GSBRNA2T00015751001,GSBRNA2T00148916001,GSBRNA2T00081377001,GSBRNA2T00004772001,GSBRNA2T00030810001,GSBRNA2T00073348001,GSBRNA2T00117906001…
Biological process	glycosinolate metabolic process	GO:0019757	0.0235845	1.62737	GSBRNA2T00002171001,GSBRNA2T00023076001,GSBRNA2T00087922001,GSBRNA2T00075176001,GSBRNA2T00045180001,GSBRNA2T00087923001,GSBRNA2T00022049001,GSBRNA2T00045177001,GSBRNA2T00007249001,GSBRNA2T00061152001,GSBRNA2T00006457001,GSBRNA2T00024146001,GSBRNA2T00094059001,GSBRNA2T00087932001,GSBRNA2T00069089001,GSBRNA2T00008244001,GSBRNA2T00022046001
Biological process	S-glycoside metabolic process	GO:0016143	0.0235845	1.62737	GSBRNA2T00002171001,GSBRNA2T00023076001,GSBRNA2T00087922001,GSBRNA2T00075176001,GSBRNA2T00045180001,GSBRNA2T00087923001,GSBRNA2T00022049001,GSBRNA2T00045177001,GSBRNA2T00007249001,GSBRNA2T00061152001,GSBRNA2T00006457001,GSBRNA2T00024146001,GSBRNA2T00094059001,GSBRNA2T00087932001,GSBRNA2T00069089001,GSBRNA2T00008244001,GSBRNA2T00022046001
Biological process	glucosinolate metabolic process	GO:0019760	0.0235845	1.62737	GSBRNA2T00002171001,GSBRNA2T00023076001,GSBRNA2T00087922001,GSBRNA2T00075176001,GSBRNA2T00045180001,GSBRNA2T00087923001,GSBRNA2T00022049001,GSBRNA2T00045177001,GSBRNA2T00007249001,GSBRNA2T00061152001,GSBRNA2T00006457001,GSBRNA2T00024146001,GSBRNA2T00094059001,GSBRNA2T00087932001,GSBRNA2T00069089001,GSBRNA2T00008244001,GSBRNA2T00022046001
Biological process	maturation of LSU-rRNA from tricistronic rRNA transcript (SSU-rRNA, 5.8S rRNA, LSU-rRNA)	GO:0000463	0.0238488	1.62253	GSBRNA2T00101507001,GSBRNA2T00138973001,GSBRNA2T00124761001,GSBRNA2T00096119001,GSBRNA2T00080689001,GSBRNA2T00125132001,GSBRNA2T00089702001,GSBRNA2T00128857001,GSBRNA2T00013975001,GSBRNA2T00006155001,GSBRNA2T00078693001,GSBRNA2T00010235001,GSBRNA2T00132049001,GSBRNA2T00057703001
Biological process	pyridine nucleotide salvage	GO:0019365	0.0238774	1.62201	GSBRNA2T00083228001,GSBRNA2T00040751001,GSBRNA2T00054466001
Biological process	nicotinate nucleotide metabolic process	GO:0046497	0.0238774	1.62201	GSBRNA2T00083228001,GSBRNA2T00040751001,GSBRNA2T00054466001
Biological process	negative regulation of carbohydrate metabolic process	GO:0045912	0.0238774	1.62201	GSBRNA2T00003358001,GSBRNA2T00016785001,GSBRNA2T00038154001,GSBRNA2T00049485001,GSBRNA2T00028976001
Biological process	NAD salvage	GO:0034355	0.0238774	1.62201	GSBRNA2T00083228001,GSBRNA2T00040751001,GSBRNA2T00054466001
Biological process	sulfate reduction	GO:0019419	0.0238774	1.62201	GSBRNA2T00156974001,GSBRNA2T00106793001,GSBRNA2T00138265001,GSBRNA2T00131663001
Biological process	nicotinate nucleotide salvage	GO:0019358	0.0238774	1.62201	GSBRNA2T00083228001,GSBRNA2T00040751001,GSBRNA2T00054466001
Biological process	nicotinate nucleotide biosynthetic process	GO:0019357	0.0238774	1.62201	GSBRNA2T00083228001,GSBRNA2T00040751001,GSBRNA2T00054466001
Biological process	cellular response to oxygen-containing compound	GO:1901701	0.0238959	1.62168	GSBRNA2T00057044001,GSBRNA2T00072318001,GSBRNA2T00043891001,GSBRNA2T00014080001,GSBRNA2T00067871001,GSBRNA2T00008105001,GSBRNA2T00074154001,GSBRNA2T00028695001,GSBRNA2T00015754001,GSBRNA2T00067884001,GSBRNA2T00035595001,GSBRNA2T00005379001,GSBRNA2T00124863001,GSBRNA2T00063644001,GSBRNA2T00039193001,GSBRNA2T00011092001,GSBRNA2T00000858001,GSBRNA2T00081457001,GSBRNA2T00028451001,GSBRNA2T00040869001…
Biological process	organic hydroxy compound metabolic process	GO:1901615	0.0244606	1.61153	GSBRNA2T00111327001,GSBRNA2T00070338001,GSBRNA2T00079794001,GSBRNA2T00073230001,GSBRNA2T00095333001,GSBRNA2T00075255001,GSBRNA2T00151456001,GSBRNA2T00027986001,GSBRNA2T00070099001,GSBRNA2T00034142001,GSBRNA2T00028821001,GSBRNA2T00021689001,GSBRNA2T00040075001,GSBRNA2T00029940001,GSBRNA2T00070098001,GSBRNA2T00068066001,GSBRNA2T00071149001,GSBRNA2T00029579001,GSBRNA2T00086715001,GSBRNA2T00070100001…
Biological process	pyridine-containing compound metabolic process	GO:0072524	0.0259725	1.58549	GSBRNA2T00135568001,GSBRNA2T00031639001,GSBRNA2T00083228001,GSBRNA2T00040751001,GSBRNA2T00122385001,GSBRNA2T00054466001,GSBRNA2T00047855001,GSBRNA2T00133077001,GSBRNA2T00034275001,GSBRNA2T00037251001,GSBRNA2T00010044001
Biological process	response to oxidative stress	GO:0006979	0.0259725	1.58549	GSBRNA2T00077296001,GSBRNA2T00054421001,GSBRNA2T00106935001,GSBRNA2T00064141001,GSBRNA2T00074552001,GSBRNA2T00136273001,GSBRNA2T00092271001,GSBRNA2T00137271001,GSBRNA2T00047517001,GSBRNA2T00013915001,GSBRNA2T00136178001,GSBRNA2T00106932001,GSBRNA2T00068642001,GSBRNA2T00094622001,GSBRNA2T00043868001,GSBRNA2T00131144001,GSBRNA2T00027608001,GSBRNA2T00019388001,GSBRNA2T00121586001,GSBRNA2T00145490001…
Biological process	positive regulation of signal transduction	GO:0009967	0.0259725	1.58549	GSBRNA2T00063644001,GSBRNA2T00039193001,GSBRNA2T00074558001,GSBRNA2T00141391001,GSBRNA2T00095354001,GSBRNA2T00038601001,GSBRNA2T00081113001
Biological process	positive regulation of signaling	GO:0023056	0.0259725	1.58549	GSBRNA2T00063644001,GSBRNA2T00039193001,GSBRNA2T00074558001,GSBRNA2T00141391001,GSBRNA2T00095354001,GSBRNA2T00038601001,GSBRNA2T00081113001
Biological process	response to osmotic stress	GO:0006970	0.0259725	1.58549	GSBRNA2T00075176001,GSBRNA2T00023076001,GSBRNA2T00087922001,GSBRNA2T00038175001,GSBRNA2T00062162001,GSBRNA2T00002171001,GSBRNA2T00106932001,GSBRNA2T00157994001,GSBRNA2T00045180001,GSBRNA2T00034733001,GSBRNA2T00045177001,GSBRNA2T00155698001,GSBRNA2T00097285001,GSBRNA2T00069948001,GSBRNA2T00082070001,GSBRNA2T00010517001,GSBRNA2T00010518001,GSBRNA2T00029992001,GSBRNA2T00003270001,GSBRNA2T00033887001
Biological process	positive regulation of cell communication	GO:0010647	0.0259725	1.58549	GSBRNA2T00063644001,GSBRNA2T00039193001,GSBRNA2T00074558001,GSBRNA2T00141391001,GSBRNA2T00095354001,GSBRNA2T00038601001,GSBRNA2T00081113001
Biological process	photosynthetic electron transport in photosystem I	GO:0009773	0.0264591	1.57742	GSBRNA2T00033137001,GSBRNA2T00025438001,GSBRNA2T00043766001,GSBRNA2T00014879001,GSBRNA2T00072712001,GSBRNA2T00151521001,GSBRNA2T00054632001,GSBRNA2T00048677001,GSBRNA2T00003731001
Biological process	glutamine family amino acid metabolic process	GO:0009064	0.0280503	1.55206	GSBRNA2T00090129001,GSBRNA2T00071300001,GSBRNA2T00030878001,GSBRNA2T00017092001,GSBRNA2T00114519001,GSBRNA2T00112701001,GSBRNA2T00112825001,GSBRNA2T00142964001,GSBRNA2T00082899001,GSBRNA2T00008196001,GSBRNA2T00065379001,GSBRNA2T00059225001,GSBRNA2T00143205001,GSBRNA2T00019407001,GSBRNA2T00017125001,GSBRNA2T00135415001,GSBRNA2T00081839001,GSBRNA2T00129452001,GSBRNA2T00000003001,GSBRNA2T00056355001…
Biological process	oxylipin metabolic process	GO:0031407	0.0292789	1.53344	GSBRNA2T00132137001,GSBRNA2T00099128001,GSBRNA2T00090867001,GSBRNA2T00152962001,GSBRNA2T00117902001,GSBRNA2T00030463001,GSBRNA2T00124394001,GSBRNA2T00097608001,GSBRNA2T00034534001,GSBRNA2T00124396001
Biological process	oxylipin biosynthetic process	GO:0031408	0.0292789	1.53344	GSBRNA2T00132137001,GSBRNA2T00099128001,GSBRNA2T00090867001,GSBRNA2T00152962001,GSBRNA2T00117902001,GSBRNA2T00030463001,GSBRNA2T00124394001,GSBRNA2T00097608001,GSBRNA2T00034534001,GSBRNA2T00124396001
Biological process	transport	GO:0006810	0.0295624	1.52926	GSBRNA2T00087846001,GSBRNA2T00116222001,GSBRNA2T00064897001,GSBRNA2T00077599001,GSBRNA2T00002433001,GSBRNA2T00078853001,GSBRNA2T00023649001,GSBRNA2T00096243001,GSBRNA2T00069516001,GSBRNA2T00007444001,GSBRNA2T00072992001,GSBRNA2T00016532001,GSBRNA2T00123950001,GSBRNA2T00009760001,GSBRNA2T00120170001,GSBRNA2T00055202001,GSBRNA2T00108882001,GSBRNA2T00085231001,GSBRNA2T00069480001,GSBRNA2T00017654001…
Biological process	anion transmembrane transport	GO:0098656	0.0302305	1.51955	GSBRNA2T00023649001,GSBRNA2T00064897001,GSBRNA2T00055202001,GSBRNA2T00017654001,GSBRNA2T00077779001,GSBRNA2T00016532001,GSBRNA2T00067777001,GSBRNA2T00090553001,GSBRNA2T00001912001,GSBRNA2T00066303001,GSBRNA2T00157772001,GSBRNA2T00062899001,GSBRNA2T00076991001,GSBRNA2T00003348001,GSBRNA2T00069601001,GSBRNA2T00042490001,GSBRNA2T00075847001,GSBRNA2T00086197001,GSBRNA2T00011255001,GSBRNA2T00135625001…
Biological process	cellular amino acid catabolic process	GO:0009063	0.0303473	1.51788	GSBRNA2T00030878001,GSBRNA2T00090129001,GSBRNA2T00019407001,GSBRNA2T00112701001,GSBRNA2T00017092001,GSBRNA2T00142964001,GSBRNA2T00099968001,GSBRNA2T00008196001,GSBRNA2T00091375001,GSBRNA2T00078572001,GSBRNA2T00095662001,GSBRNA2T00062544001,GSBRNA2T00126668001,GSBRNA2T00126538001,GSBRNA2T00060868001,GSBRNA2T00095389001,GSBRNA2T00013025001,GSBRNA2T00045941001,GSBRNA2T00004542001,GSBRNA2T00004432001…
Biological process	snRNA pseudouridine synthesis	GO:0031120	0.0305954	1.51434	GSBRNA2T00071658001,GSBRNA2T00050753001,GSBRNA2T00015957001,GSBRNA2T00055310001,GSBRNA2T00067631001,GSBRNA2T00029343001
Biological process	cellular detoxification	GO:1990748	0.0318287	1.49718	GSBRNA2T00077296001,GSBRNA2T00054421001,GSBRNA2T00064141001,GSBRNA2T00074552001,GSBRNA2T00092271001,GSBRNA2T00047517001,GSBRNA2T00013915001,GSBRNA2T00043891001,GSBRNA2T00136178001,GSBRNA2T00084825001,GSBRNA2T00068642001,GSBRNA2T00067884001,GSBRNA2T00094622001,GSBRNA2T00043868001,GSBRNA2T00027608001,GSBRNA2T00019388001,GSBRNA2T00081296001,GSBRNA2T00000056001,GSBRNA2T00087218001,GSBRNA2T00071116001…
Biological process	cellular response to toxic substance	GO:0097237	0.0318287	1.49718	GSBRNA2T00077296001,GSBRNA2T00054421001,GSBRNA2T00064141001,GSBRNA2T00074552001,GSBRNA2T00092271001,GSBRNA2T00047517001,GSBRNA2T00013915001,GSBRNA2T00043891001,GSBRNA2T00136178001,GSBRNA2T00084825001,GSBRNA2T00068642001,GSBRNA2T00067884001,GSBRNA2T00094622001,GSBRNA2T00043868001,GSBRNA2T00027608001,GSBRNA2T00019388001,GSBRNA2T00081296001,GSBRNA2T00000056001,GSBRNA2T00087218001,GSBRNA2T00071116001…
Biological process	response to chemical	GO:0042221	0.0326635	1.48594	GSBRNA2T00018596001,GSBRNA2T00106839001,GSBRNA2T00157016001,GSBRNA2T00077296001,GSBRNA2T00002404001,GSBRNA2T00054421001,GSBRNA2T00151456001,GSBRNA2T00046820001,GSBRNA2T00002403001,GSBRNA2T00064141001,GSBRNA2T00038175001,GSBRNA2T00074552001,GSBRNA2T00062162001,GSBRNA2T00048932001,GSBRNA2T00096592001,GSBRNA2T00077234001,GSBRNA2T00057044001,GSBRNA2T00092271001,GSBRNA2T00081306001,GSBRNA2T00000642001…
Biological process	protein refolding	GO:0042026	0.0334216	1.47597	GSBRNA2T00069552001,GSBRNA2T00142479001,GSBRNA2T00085735001,GSBRNA2T00019733001,GSBRNA2T00080816001,GSBRNA2T00123626001,GSBRNA2T00096953001,GSBRNA2T00035213001,GSBRNA2T00061266001,GSBRNA2T00096278001,GSBRNA2T00137693001,GSBRNA2T00007549001,GSBRNA2T00057933001,GSBRNA2T00054203001
Biological process	post-embryonic plant organ morphogenesis	GO:0090697	0.035938	1.44445	GSBRNA2T00063644001,GSBRNA2T00034667001,GSBRNA2T00039193001,GSBRNA2T00038601001
Biological process	cellular component biogenesis	GO:0044085	0.036514	1.43754	GSBRNA2T00018372001,GSBRNA2T00136519001,GSBRNA2T00107727001,GSBRNA2T00055196001,GSBRNA2T00149613001,GSBRNA2T00012796001,GSBRNA2T00060697001,GSBRNA2T00040037001,GSBRNA2T00116244001,GSBRNA2T00157536001,GSBRNA2T00000687001,GSBRNA2T00130293001,GSBRNA2T00082361001,GSBRNA2T00113589001,GSBRNA2T00089522001,GSBRNA2T00151202001,GSBRNA2T00015103001,GSBRNA2T00069132001,GSBRNA2T00084824001,GSBRNA2T00101507001…
Biological process	sucrose metabolic process	GO:0005985	0.0367804	1.43438	GSBRNA2T00076499001,GSBRNA2T00099581001,GSBRNA2T00038035001,GSBRNA2T00017750001,GSBRNA2T00129795001,GSBRNA2T00081619001,GSBRNA2T00062437001,GSBRNA2T00140183001,GSBRNA2T00015751001,GSBRNA2T00148916001,GSBRNA2T00081377001,GSBRNA2T00030810001,GSBRNA2T00073348001,GSBRNA2T00147625001
Biological process	response to salt stress	GO:0009651	0.0371717	1.42979	GSBRNA2T00075176001,GSBRNA2T00023076001,GSBRNA2T00087922001,GSBRNA2T00038175001,GSBRNA2T00062162001,GSBRNA2T00002171001,GSBRNA2T00106932001,GSBRNA2T00045180001,GSBRNA2T00034733001,GSBRNA2T00045177001,GSBRNA2T00097285001,GSBRNA2T00069948001,GSBRNA2T00082070001,GSBRNA2T00010517001,GSBRNA2T00010518001,GSBRNA2T00029992001,GSBRNA2T00003270001,GSBRNA2T00033887001
Biological process	oligosaccharide transport	GO:0015772	0.0372634	1.42872	GSBRNA2T00099581001,GSBRNA2T00081619001,GSBRNA2T00062437001,GSBRNA2T00115350001,GSBRNA2T00030810001,GSBRNA2T00073348001,GSBRNA2T00065875001
Biological process	phospholipid translocation	GO:0045332	0.0372634	1.42872	GSBRNA2T00035511001,GSBRNA2T00090477001,GSBRNA2T00098298001,GSBRNA2T00084107001,GSBRNA2T00012648001,GSBRNA2T00018767001,GSBRNA2T00080139001
Biological process	disaccharide transport	GO:0015766	0.0372634	1.42872	GSBRNA2T00099581001,GSBRNA2T00081619001,GSBRNA2T00062437001,GSBRNA2T00115350001,GSBRNA2T00030810001,GSBRNA2T00073348001,GSBRNA2T00065875001
Biological process	response to hydrogen peroxide	GO:0042542	0.0380323	1.41985	GSBRNA2T00106932001,GSBRNA2T00043215001,GSBRNA2T00050618001,GSBRNA2T00010518001,GSBRNA2T00069948001,GSBRNA2T00029992001,GSBRNA2T00003270001,GSBRNA2T00082070001,GSBRNA2T00010517001,GSBRNA2T00033887001
Biological process	amino acid transport	GO:0006865	0.038409	1.41557	GSBRNA2T00077599001,GSBRNA2T00023649001,GSBRNA2T00007444001,GSBRNA2T00007627001,GSBRNA2T00049913001,GSBRNA2T00064116001,GSBRNA2T00090968001,GSBRNA2T00028739001,GSBRNA2T00065357001,GSBRNA2T00086197001,GSBRNA2T00037110001,GSBRNA2T00076991001,GSBRNA2T00063399001,GSBRNA2T00032391001,GSBRNA2T00026629001,GSBRNA2T00088395001,GSBRNA2T00019272001,GSBRNA2T00053575001,GSBRNA2T00068034001,GSBRNA2T00118587001…
Biological process	macromolecule modification	GO:0043412	0.0409992	1.38722	GSBRNA2T00096206001,GSBRNA2T00016155001,GSBRNA2T00045438001,GSBRNA2T00147022001,GSBRNA2T00072665001,GSBRNA2T00126717001,GSBRNA2T00136819001,GSBRNA2T00149066001,GSBRNA2T00065972001,GSBRNA2T00074574001,GSBRNA2T00153605001,GSBRNA2T00005351001,GSBRNA2T00048757001,GSBRNA2T00155769001,GSBRNA2T00136175001,GSBRNA2T00033032001,GSBRNA2T00140836001,GSBRNA2T00107067001,GSBRNA2T00029767001,GSBRNA2T00157100001…
Biological process	ribosomal small subunit assembly	GO:0000028	0.0411756	1.38536	GSBRNA2T00083320001,GSBRNA2T00005809001,GSBRNA2T00057897001,GSBRNA2T00051168001,GSBRNA2T00082909001,GSBRNA2T00119621001,GSBRNA2T00012237001,GSBRNA2T00137209001,GSBRNA2T00049305001,GSBRNA2T00061355001,GSBRNA2T00132548001,GSBRNA2T00094705001,GSBRNA2T00006766001,GSBRNA2T00155471001,GSBRNA2T00064170001,GSBRNA2T00000251001,GSBRNA2T00068520001,GSBRNA2T00059210001,GSBRNA2T00060588001,GSBRNA2T00068219001…
Biological process	L-glutamate transmembrane transport	GO:0015813	0.0414563	1.38241	GSBRNA2T00023649001,GSBRNA2T00001912001,GSBRNA2T00076991001,GSBRNA2T00069601001,GSBRNA2T00042490001
Biological process	proline catabolic process to glutamate	GO:0010133	0.0414563	1.38241	GSBRNA2T00017092001,GSBRNA2T00082899001,GSBRNA2T00008196001,GSBRNA2T00059225001,GSBRNA2T00033737001
Biological process	L-lysine transport	GO:1902022	0.0414563	1.38241	GSBRNA2T00023649001,GSBRNA2T00001912001,GSBRNA2T00076991001,GSBRNA2T00069601001,GSBRNA2T00042490001
Biological process	L-lysine transmembrane transport	GO:1903401	0.0414563	1.38241	GSBRNA2T00023649001,GSBRNA2T00001912001,GSBRNA2T00076991001,GSBRNA2T00069601001,GSBRNA2T00042490001
Biological process	inorganic anion transmembrane transport	GO:0098661	0.0422726	1.37394	GSBRNA2T00064897001,GSBRNA2T00016532001,GSBRNA2T00055202001,GSBRNA2T00017654001,GSBRNA2T00090553001,GSBRNA2T00067777001,GSBRNA2T00017656001,GSBRNA2T00031583001,GSBRNA2T00093109001,GSBRNA2T00030203001,GSBRNA2T00140339001,GSBRNA2T00074518001,GSBRNA2T00140781001,GSBRNA2T00135625001,GSBRNA2T00040388001,GSBRNA2T00081597001
Biological process	response to water deprivation	GO:0009414	0.0441529	1.35504	GSBRNA2T00038175001,GSBRNA2T00137461001,GSBRNA2T00085342001,GSBRNA2T00045156001,GSBRNA2T00092007001,GSBRNA2T00101445001,GSBRNA2T00119539001,GSBRNA2T00050633001,GSBRNA2T00047743001,GSBRNA2T00098348001,GSBRNA2T00056090001,GSBRNA2T00034514001,GSBRNA2T00007883001,GSBRNA2T00005977001,GSBRNA2T00050955001
Biological process	monosaccharide catabolic process	GO:0046365	0.0467774	1.32996	GSBRNA2T00063071001,GSBRNA2T00024758001,GSBRNA2T00012859001,GSBRNA2T00047139001,GSBRNA2T00033364001,GSBRNA2T00093722001
Biological process	alpha-amino acid catabolic process	GO:1901606	0.0474647	1.32363	GSBRNA2T00030878001,GSBRNA2T00090129001,GSBRNA2T00019407001,GSBRNA2T00112701001,GSBRNA2T00017092001,GSBRNA2T00142964001,GSBRNA2T00099968001,GSBRNA2T00008196001,GSBRNA2T00091375001,GSBRNA2T00078572001,GSBRNA2T00095662001,GSBRNA2T00062544001,GSBRNA2T00126668001,GSBRNA2T00126538001,GSBRNA2T00060868001,GSBRNA2T00095389001,GSBRNA2T00013025001,GSBRNA2T00045941001,GSBRNA2T00125154001,GSBRNA2T00033737001
Biological process	cellular response to light stimulus	GO:0071482	0.0475328	1.32301	GSBRNA2T00083202001,GSBRNA2T00086360001,GSBRNA2T00136998001,GSBRNA2T00046484001,GSBRNA2T00145300001,GSBRNA2T00141391001,GSBRNA2T00095354001,GSBRNA2T00089673001
