# Supplementary material for: Transcriptomic, Metabolomic and Ionomic Analyses Reveal Early Modulation of Leaf Mineral Content in Brassica napus under Mild or Severe Drought
Source: Int J Mol Sci. 2022 Jan 11;23(2):781. doi: 10.3390/ijms23020781 (PMC8776245; doi:10.3390/ijms23020781)
Supplement: Supplementary file 1 [file ijms-23-00781-s001.zip › Supplementary Data 2.xlsx]

## Sheet: Legend
Brassica napus DEGs coding transporters from the curated list of Whitt et al. (2020) or extracted from Amigo2 and the “ion transport” term (GO:0006811) with genes unambiguously related to the transport of elements.
Availbale at:	http://amigo.geneontology.org/amigo/term/GO:0006811

## Sheet: DEGs of ion transporters
Gene ID	Gene symbol	Source	Type	Element transported	log2FoldChange 5d	adjusted.Pvalue 5d	log2FoldChange 11d	adjusted.Pvalue 11d	log2FoldChange 20d	adjusted.Pvalue 20d	5d	11d	20d	combination
BnaC04g51480D	BOR1	Whitt et al. (2020)	transporter	B	-1.10865	0.039299	-0.288831	0.731403	-0.544051	0.321941	a			a
BnaA04g26910D	BOR1	Whitt et al. (2020)	transporter	B	-1.58578	0.014463	-0.33446	0.60989	-1.77325	3.08e-06	a		c	ac
BnaAnng31830D	BOR2	Whitt et al. (2020)	transporter	B	-0.485591	0.757587	-1.47886	0.00362961	-0.557125	0.344788		b		b
BnaC04g21390D	BOR2	Whitt et al. (2020)	transporter	B	-0.679904	0.520607	-1.40253	0.0174531	-0.524132	0.389721		b		b
BnaA10g18740D	CNGC2	Whitt et al. (2020)	transporter	Ca, Mg	-0.0572161	0.972227	-0.15234	0.811322	-0.758439	0.0200532			c	c
BnaC09g42460D	CNGC2	Whitt et al. (2020)	transporter	Ca, Mg	-0.390283	0.664085	-0.321085	0.500855	-0.716279	0.025194			c	c
BnaA09g26130D	ABCC1	Whitt et al. (2020)	transporter	Cd	0.0342316	0.988297	-0.890251	0.128746	-1.17898	0.0161806			c	c
BnaC05g23280D	ABCC1	Whitt et al. (2020)	transporter	Cd	-0.0438159	0.98537	-0.892549	0.0518599	-1.10624	0.00607916			c	c
BnaC03g59700D	ABCC1	Whitt et al. (2020)	transporter	Cd	-0.406111	0.621716	-0.460619	0.334221	-0.722543	0.0457181			c	c
BnaA07g19610D	ABCG36	Whitt et al. (2020)	transporter	Cd	-0.514385	0.869783	-2.26282	0.048657	-1.84109	0.0589425		b		b
BnaCnng64010D	/	Whitt et al. (2020)	transporter	Cd	-0.187336	0.975704	-2.21461	0.0427709	-1.73644	0.0636075		b		b
BnaAnng10870D	HMA3	Whitt et al. (2020)	transporter	Cd, Zn	NA	NA	-3.71095	0.0162949	-3.81345	0.00634106		b	c	bc
BnaCnng35110D	ZIFL2	Whitt et al. (2020)	transporter	Cs	0.80937	0.321896	1.72618	0.00526575	1.9251	0.00087243		b	c	bc
BnaAnng40280D	ZIFL2	Whitt et al. (2020)	transporter	Cs	0.411319	0.845709	1.1508	0.102838	1.45083	0.00892623			c	c
BnaA10g12280D	COPT1	Whitt et al. (2020)	transporter	Cu	-0.12394	0.989598	-2.48433	0.0561299	-3.05157	0.00326646			c	c
BnaC07g15960D	NRAMP4	Whitt et al. (2020)	transporter	Fe, Mn, Zn	-0.0195667	0.994476	0.659737	0.166082	0.924773	0.0167938			c	c
BnaC07g38730D	YSL1	Whitt et al. (2020)	transporter	Fe, Zn, Cu	-0.128351	0.981122	-6.72267	0.00119802	-4.21159	0.0127206		b	c	bc
BnaA08g10710D	YSL1	Whitt et al. (2020)	transporter	Fe, Zn, Cu	-0.702047	0.462352	-0.954575	0.0254892	-0.989934	0.0117097		b	c	bc
BnaA03g46460D	YSL1	Whitt et al. (2020)	transporter	Fe, Zn, Cu	-0.4761	0.911021	-6.47565	3.3e-05	-6.13658	1.1e-05		b	c	bc
BnaA05g01380D	CNGC3	Whitt et al. (2020)	transporter	K	-0.236066	0.908423	-3.77346	9.26e-05	-2.82413	0.00145381		b	c	bc
BnaC04g01250D	CNGC3	Whitt et al. (2020)	transporter	K	-0.362996	0.807131	-4.53173	0.00090286	-3.78133	0.00183738		b	c	bc
BnaA05g35790D	NPF7.3	Whitt et al. (2020)	transporter	K, NO3-	-0.796699	0.931141	0.366669	0.892023	-2.1586	0.021077			c	c
BnaA05g21170D	MGT6	Whitt et al. (2020)	transporter	Mg	NA	NA	0.517057	0.764232	2.26034	0.0159342			c	c
BnaC05g34100D	MGT6	Whitt et al. (2020)	transporter	Mg	0.548811	0.502664	1.26815	0.0165687	1.09453	0.0283661		b	c	bc
BnaA09g37250D	MTP8	Whitt et al. (2020)	transporter	Mn	-0.351813	0.718392	-0.626865	0.172836	-1.08013	0.00308496			c	c
BnaC06g19550D	NRAMP1	Whitt et al. (2020)	transporter	Mn	-0.165167	1	-6.02481	0.00943985	-7.40441	6.4e-05		b	c	bc
BnaA01g29870D	CAX2	Whitt et al. (2020)	transporter	Ca or Mn, Fe, K, P	-0.209278	0.928727	-1.75141	0.0221381	-1.21165	0.0907421		b		b
BnaC03g37860D	CAX2	Whitt et al. (2020)	transporter	Ca or Mn, Fe, K, P	-0.184766	0.912467	-0.993334	0.0380614	-0.577212	0.235136		b		b
BnaA03g32760D	CAX2	Whitt et al. (2020)	transporter	Ca or Mn, Fe, K, P	-0.317169	0.695971	-0.979958	0.0219933	-0.693639	0.103882		b		b
BnaC08g33290D	MOT1	Whitt et al. (2020)	transporter	Mo	-0.785746	0.628445	-2.20194	0.00612391	-0.895007	0.271342		b		b
BnaA09g40790D	MOT1	Whitt et al. (2020)	transporter	Mo	NA	NA	-2.59263	0.0563499	-2.53196	0.0380172			c	c
BnaA03g24340D	HKT1	Whitt et al. (2020)	transporter	Na	-1.72568	0.117378	-2.46526	0.000714369	-1.86289	0.00383579		b	c	bc
BnaC01g30800D	PHO1	Whitt et al. (2020)	transporter	P	0.580246	0.671276	0.0993195	0.918181	0.896309	0.033242			c	c
BnaAnng37580D	PHO1;H3	Whitt et al. (2020)	transporter	P	0.0875678	0.993001	-8.03463	1.98e-06	-3.2672	0.0261331		b	c	bc
BnaC08g39950D	PHO1;H3	Whitt et al. (2020)	transporter	P	-0.557979	0.553926	-6.43296	3.45e-05	-3.12846	0.0246079		b	c	bc
BnaA09g45890D	PHO1;H3	Whitt et al. (2020)	transporter	P	-0.511228	0.854124	-7.6396	5.86e-06	-3.95681	0.00750135		b	c	bc
BnaA09g45870D	PHO1;H3	Whitt et al. (2020)	transporter	P	-0.370065	0.868651	-0.0776992	0.945121	1.09737	0.010733			c	c
BnaC05g10330D	PHO1;H3	Whitt et al. (2020)	transporter	P	0.975046	0.78482	-6.02024	3.39e-05	-3.20052	0.0130442		b	c	bc
BnaC05g49630D	PHO1;H3	Whitt et al. (2020)	transporter	P	0.100028	0.97414	-1.38544	0.0121809	-0.452576	0.483302		b		b
BnaA06g38150D	PHO1;H3	Whitt et al. (2020)	transporter	P	0.590979	0.190892	-2.48316	0.0054498	-1.27425	0.152773		b		b
BnaA06g38130D	PHO1;H3	Whitt et al. (2020)	transporter	P	0.0704291	0.995355	-7.25113	6.59e-05	-3.4695	0.0309026		b	c	bc
BnaC04g06480D	PHT1-4	Whitt et al. (2020)	transporter	P	-0.709713	0.636374	-6.35549	0.00401629	-6.71667	0.000411659		b	c	bc
BnaA05g06230D	PHT1-4	Whitt et al. (2020)	transporter	P	-0.0973324	0.985823	-6.74249	0.00110335	-5.72011	0.00128307		b	c	bc
BnaC04g46050D	PHT1-4	Whitt et al. (2020)	transporter	P	-0.356752	0.924449	-4.29818	0.00779688	-4.07175	0.00362449		b	c	bc
BnaA04g22280D	PHT1-4	Whitt et al. (2020)	transporter	P	0.0272671	1	-5.15884	0.000211926	-3.67478	0.00460774		b	c	bc
BnaA05g06210D	PHT1-4	Whitt et al. (2020)	transporter	P	1.88938	0.523987	-6.56134	0.000149545	-6.28181	2.92e-05		b	c	bc
BnaC08g23200D	SULTR3;1	Whitt et al. (2020)	transporter	S	0.623774	0.749336	1.03853	0.0124889	0.989524	0.00899563		b	c	bc
BnaCnng67820D	SULTR3;1	Whitt et al. (2020)	transporter	S	0.48692	0.827342	0.886829	0.0524765	1.29385	0.000552552			c	c
BnaC04g00620D	MTP1	Whitt et al. (2020)	transporter	Zn	0.074426	0.975396	0.620769	0.19748	1.12472	0.00226905			c	c
BnaC08g39210D	PCR2	Whitt et al. (2020)	transporter	Zn	-0.417987	0.943061	-4.18558	0.00125331	-1.59125	0.17934		b		b
BnaA09g45380D	PCR2	Whitt et al. (2020)	transporter	Zn	NA	NA	-4.75839	0.00435579	-3.54244	0.0476056		b	c	bc
BnaA09g45370D	PCR2	Whitt et al. (2020)	transporter	Zn	-0.442824	0.910824	-3.18289	0.0303543	-1.0446	0.450065		b		b
BnaA03g04470D	ZIF1	Whitt et al. (2020)	transporter	Zn, Fe	-0.565497	0.917911	-6.96688	0.000831557	-2.89341	0.130498		b		b
BnaA02g01840D	ZIF1	Whitt et al. (2020)	transporter	Zn, Fe	-0.143706	0.91745	0.222541	0.755121	1.04053	0.00577305			c	c
BnaC02g04980D	ZIF1	Whitt et al. (2020)	transporter	Zn, Fe	-0.202417	0.886152	0.591088	0.285467	1.40536	0.000429988			c	c
BnaC03g06010D	ZIF1	Whitt et al. (2020)	transporter	Zn, Fe	0.301879	0.861049	-3.0401	0.0291011	-0.354752	0.840188		b		b
BnaC06g06210D	NCL	Amigo2 - GO:0006811	transporter	Ca, Na	0.176078	0.925746	0.6275	0.244034	1.00572	0.0159076			c	c
BnaA07g12410D	CMCU	Amigo2 - GO:0006811	transporter	Ca	1.03137	0.429706	1.00016	0.185119	1.34283	0.0298881			c	c
BnaA10g27650D	CAX4	Amigo2 - GO:0006811	transporter	Ca	NA	NA	-7.36564	0.00126988	-4.38112	0.0201389		b	c	bc
BnaA03g54160D	ACA2	Amigo2 - GO:0006811	transporter	Ca	-0.0218827	0.995355	-1.93723	0.00274397	-1.88414	0.00226315		b	c	bc
BnaC03g29810D	OSCA1	Amigo2 - GO:0006811	transporter	Ca	-0.201119	0.927259	0.67853	0.0987078	1.16827	0.000462105			c	c
BnaCnng75720D	CCX1	Amigo2 - GO:0006811	transporter	Ca, Na	-1.06245	0.0214721	-1.94527	0.000646641	-1.64418	0.00291276	a	b	c	abc
BnaCnng26490D	CMCU	Amigo2 - GO:0006811	transporter	Ca	1.40874	0.203793	1.23834	0.132865	1.63168	0.0167419			c	c
BnaA09g41840D	N/A	Amigo2 - GO:0006811	transporter	Ca	-0.0140327	0.998111	0.0101484	0.990581	0.771541	0.0119444			c	c
BnaA10g16940D	CCX1	Amigo2 - GO:0006811	transporter	Ca	-1.12333	0.0110747	-2.56841	0.000137282	-1.50493	0.0216764	a	b	c	abc
BnaC03g64830D	CSC1	Amigo2 - GO:0006811	transporter	Ca	-0.0507893	0.975404	0.138999	0.861758	0.862198	0.0260407			c	c
BnaC04g44780D	SAMTL	Amigo2 - GO:0006811	transporter	Ca	0.133344	0.911684	0.913476	0.00268003	0.604922	0.0568216		b		b
BnaC05g12190D	NRAMP6	Amigo2 - GO:0006811	transporter	Fe, Mn, Zn	0.266153	0.961066	0.866803	0.244633	1.91126	5.05e-05			c	c
BnaA02g17720D	VTL2	Amigo2 - GO:0006811	transporter	Fe	0.156683	0.980808	-1.2412	0.0242432	-2.35277	6.34e-07		b	c	bc
BnaC01g20480D	MEB1	Amigo2 - GO:0006811	transporter	Fe	-0.500271	0.797333	0.444312	0.746934	2.19388	0.00274301			c	c
BnaC05g49110D	ZIP5	Amigo2 - GO:0006811	transporter	Fe	-0.291628	0.905544	-3.01607	0.000960788	-2.68773	0.00132846		b	c	bc
BnaA10g03460D	ZIP5	Amigo2 - GO:0006811	transporter	Fe, Zn	0.0236471	1	-2.17784	0.00372041	-1.82771	0.0103252		b	c	bc
BnaA05g08850D	KUP11	Amigo2 - GO:0006811	transporter	K	0.312478	0.696556	0.689158	0.0456807	0.893628	0.00309582		b	c	bc
BnaC09g42680D	POT8	Amigo2 - GO:0006811	transporter	K	0.231514	0.920589	1.3146	0.0202079	0.905861	0.0887827		b		b
BnaC06g31400D	POT6	Amigo2 - GO:0006811	transporter	K	0.14982	0.903539	0.181836	0.791625	0.759301	0.0321669			c	c
BnaC05g46790D	NHX2	Amigo2 - GO:0006811	transporter	K	0.106657	0.97967	0.281722	0.762939	1.34165	0.00585007			c	c
BnaA05g32130D	NHX2	Amigo2 - GO:0006811	transporter	K	0.207251	0.939904	0.878939	0.134103	1.85637	4.89e-05			c	c
BnaA07g38760D	POT6	Amigo2 - GO:0006811	transporter	K	0.937852	0.0898349	0.931058	0.127249	2.09788	1.1e-05			c	c
BnaC04g29260D	ENOR3L3	Amigo2 - GO:0006811	transporter	Mg	0.403829	0.823162	0.651619	0.441231	2.18921	3.98e-05			c	c
BnaA04g11960D	AVI2	Amigo2 - GO:0006811	transporter	Mg	-0.570048	0.771031	-2.25712	0.000382396	-1.21058	0.0480489		b	c	bc
BnaA09g43410D	AVI2	Amigo2 - GO:0006811	transporter	Mg	-0.451201	0.507137	-1.01614	0.00137696	-0.216429	0.591054		b		b
BnaCnng04610D	PML4	Amigo2 - GO:0006811	transporter	Mn, Ca	-0.483131	0.210305	-0.669655	0.022509	-0.581268	0.0396336		b	c	bc
BnaA07g37130D	PML4	Amigo2 - GO:0006811	transporter	Mn, Ca	-0.688122	0.776498	-1.45051	0.0501417	-3.23434	2.14e-06			c	c
BnaC02g35070D	UPS1	Amigo2 - GO:0006811	transporter	N	-0.258475	0.873962	-0.648816	0.449073	-1.58335	0.00618866			c	c
BnaA09g47380D	NPF6.3	Amigo2 - GO:0006811	transporter	N	-1.2176	0.0223914	-1.19537	0.0504284	-0.764732	0.183582	a			a
BnaC05g09690D	NPF6.3	Amigo2 - GO:0006811	transporter	N	0.307742	0.899634	-1.21842	0.212833	-2.29216	0.00193466			c	c
BnaC08g15370D	NPF6.3	Amigo2 - GO:0006811	transporter	N	-1.94751	3.89e-08	-2.64012	5.07e-13	-1.47278	2.86e-05	a	b	c	abc
BnaC08g08610D	AMT1-1	Amigo2 - GO:0006811	transporter	N	1.69843	0.712106	-6.6328	0.001003	-6.16321	0.00081131		b	c	bc
BnaCnng62050D	AMT2	Amigo2 - GO:0006811	transporter	N	-0.0474929	0.992696	-1.70888	0.0256803	-1.26669	0.0824254		b		b
BnaA08g24900D	NPF6.3	Amigo2 - GO:0006811	transporter	N	-1.89681	3.4e-10	-3.38168	6.84e-16	-1.77345	8.13e-06	a	b	c	abc
BnaA05g35560D	AMT1-1	Amigo2 - GO:0006811	transporter	N	-0.263032	0.794613	-2.05039	0.0289468	-2.27641	0.00572073		b	c	bc
BnaC03g56990D	NRT2.5	Amigo2 - GO:0006811	transporter	N	-1.14623	0.521371	-6.06863	2.23e-05	-5.4289	9.94e-06		b	c	bc
BnaC03g27680D	NRT3.1	Amigo2 - GO:0006811	transporter	N	-0.859215	0.906522	-2.65147	0.117251	-3.44941	0.00729334			c	c
BnaC02g46970D	DUR3	Amigo2 - GO:0006811	transporter	N, Na	0.0151864	0.997365	-0.785686	0.16231	-1.1284	0.014029			c	c
BnaA02g23880D	DUR3	Amigo2 - GO:0006811	transporter	N, Na	-0.0577354	0.973493	-0.606596	0.381861	-1.24983	0.0110771			c	c
BnaA06g01060D	NCL	Amigo2 - GO:0006811	transporter	Ca, Na	-0.649366	0.742671	0.520552	0.438995	1.18325	0.00984425			c	c
BnaA05g30980D	NHX4	Amigo2 - GO:0006811	transporter	Na	-1.64429	0.000317529	0.506633	0.718988	0.786092	0.416964	a			a
BnaC02g39630D	NHX1	Amigo2 - GO:0006811	transporter	Na	0.212019	0.824348	0.172337	0.780396	0.968342	0.00182179			c	c
BnaC06g30370D	PHO1-H1	Amigo2 - GO:0006811	transporter	P	0.247426	0.845061	-0.67845	0.398082	-2.27722	0.000126456			c	c
BnaA06g19110D	MPT2	Amigo2 - GO:0006811	transporter	P	0.0100702	1	-10.5617	0.000257123	-7.34012	0.00315389		b	c	bc
BnaC09g43140D	MPT3	Amigo2 - GO:0006811	transporter	P	-1.13135	0.00634856	-1.56074	9.46e-05	-1.17925	0.00290708	a	b	c	abc
BnaC01g35550D	SULTR3;4	Amigo2 - GO:0006811	transporter	S	0.225534	0.939066	0.810602	0.27648	3.04482	2.19e-09			c	c
BnaA01g28310D	SULTR3;4	Amigo2 - GO:0006811	transporter	S	-0.500757	0.789604	0.817632	0.445908	2.12983	0.00188668			c	c
BnaC02g08870D	SULTR3;5	Amigo2 - GO:0006811	transporter	S	0.306284	0.908159	-1.36513	0.00747489	-0.405506	0.547159		b		b
BnaC09g43540D	SULTR4;1	Amigo2 - GO:0006811	transporter	S	-0.00342447	1	0.292049	0.661627	0.798772	0.0442003			c	c
BnaC03g70920D	ZIP11	Amigo2 - GO:0006811	transporter	Fe, Zn	-0.0356219	0.984717	-1.13208	0.0120607	-0.737131	0.104695		b		b
BnaA10g29800D	ZIFL1	Amigo2 - GO:0006811	transporter	Zn	-0.39673	0.652954	-1.02443	0.00410239	-0.388331	0.352823		b		b
BnaA08g00190D	ZIP11	Amigo2 - GO:0006811	transporter	Fe, Zn	-0.273269	0.788074	-1.49902	0.00154322	-0.886677	0.0682154		b		b
BnaA02g11800D	CLC-C	Amigo2 - GO:0006811	transporter	Cl	-0.201522	0.89757	-0.721729	0.0661004	-0.799785	0.0225558			c	c
BnaC02g36720D	CLC-B	Amigo2 - GO:0006811	transporter	Cl	0.0759946	0.983314	1.59382	0.0236834	2.61019	3.39e-05		b	c	bc
BnaC05g04850D	MIT2	Amigo2 - GO:0006811	transporter	Fe	-0.380641	0.76574	-0.896812	0.324665	-1.3711	0.0468479			c	c
BnaA06g14970D	VTL1	Amigo2 - GO:0006811	transporter	Fe	-1.82119	0.717585	-3.56891	0.00152241	-5.49699	7.16e-06		b	c	bc
BnaCnng74920D	VTL1	Amigo2 - GO:0006811	transporter	Fe	-0.862379	0.734868	-2.95778	1.3e-05	-3.30997	5.29e-08		b	c	bc
BnaC02g24280D	VTL2	Amigo2 - GO:0006811	transporter	Fe	0.0250527	1	-0.60806	0.410531	-1.40651	0.0097207			c	c
