# Supplementary material for: Transcriptomic, Metabolomic and Ionomic Analyses Reveal Early Modulation of Leaf Mineral Content in Brassica napus under Mild or Severe Drought
Source: Int J Mol Sci. 2022 Jan 11;23(2):781. doi: 10.3390/ijms23020781 (PMC8776245; doi:10.3390/ijms23020781)
Supplement: Supplementary file 1 [file ijms-23-00781-s001.zip › Supplementary Data 3.xlsx]

## Sheet: Legend
Transcriptomic data of Brassica napus leaves developped during water deficit.

## Sheet: Differentially Expressed Genes
Gene ID	Annotation	log2FoldChange 5d	adjusted.Pvalue 5d	log2FoldChange 11d	adjusted.Pvalue 11d	log2FoldChange 20d	adjusted.Pvalue 20d	5d	11d	20d	combination
BnaC09g03940D	BURP domain	-0.485217	0.735696	3.487	0.000961094	3.18491	0.000586216		b	c	bc
BnaC04g54950D	Universal stress protein A;UspA;Rossmann-like alpha/beta/alpha sandwich fold	0.991574	0.0707491	1.96449	0.000900616	0.78171	0.225884		b		b
BnaC05g12240D	Heat shock protein 70 family;Heat shock protein 70, conserved site	1.32536	0.032463	4.06472	1.08199e-20	4.87624	3.32373e-30	a	b	c	abc
BnaC05g00840D	SANT/Myb domain;Myb domain, plants;Homeodomain-like;Myb domain	-0.650839	0.201814	-2.18299	1.48716e-09	-1.41277	7.79102e-05		b	c	bc
BnaC06g06830D	Kelch repeat type 1;Kelch-type beta propeller	0.779413	0.377992	2.72737	0.00268373	2.99021	0.000300827		b	c	bc
BnaA03g24280D	Alpha crystallin/Hsp20 domain;HSP20-like chaperone	-3.56299	0.350989	6.36843	9.59192e-09	6.82085	1.63764e-11		b	c	bc
BnaC01g14090D	Cytochrome P450;Cytochrome P450, E-class, group I;Cytochrome P450, conserved site	0.144887	0.94821	-0.931652	0.215798	-1.61218	0.00533656			c	c
BnaA08g00130D	No apical meristem (NAM) protein	1.10501	0.772629	2.54569	0.0477559	-1.07306	0.375098		b		b
BnaC02g01440D	Transferase;Chloramphenicol acetyltransferase-like domain	-0.069224	0.969619	0.0898862	0.936395	1.62519	0.000310225			c	c
BnaA03g13140D	Plant lipid transfer protein/Par allergen;Bifunctional inhibitor/plant lipid transfer protein/seed storage helical domain	0.993586	0.364775	3.3609	0.0383076	4.83043	0.000364297		b	c	bc
BnaA09g55990D	DnaJ domain;Chaperone DnaJ, C-terminal;HSP40/DnaJ peptide-binding;DnaJ domain, conserved site	1.9656	1.56947e-09	2.32645	2.7694e-06	3.8523	2.48092e-16	a	b	c	abc
BnaC02g43080D	Tetrapeptide transporter, OPT1/isp4;Oligopeptide transporter OPT superfamily	-0.399789	0.613351	-2.33763	0.00425266	-2.47752	0.000926053		b	c	bc
BnaAnng25570D	Protein kinase, catalytic domain;Serine-threonine/tyrosine-protein kinase catalytic domain;Serine/threonine- / dual specificity protein kinase, catalytic domain;Serine/threonine-protein kinase, active site;Protein kinase-like domain;Concanavalin A-like lectin/glucanase, subgroup;Protein kinase, ATP binding site;Tyrosine-protein kinase, catalytic domain	-0.978123	0.760641	-2.85091	0.00950872	-3.26557	0.00108257		b	c	bc
BnaA10g00780D	SANT/Myb domain;Myb domain, plants;Homeodomain-like;Myb domain	-0.403826	0.656168	-2.04249	4.58376e-09	-1.27293	0.000243214		b	c	bc
BnaC05g10330D	EXS, C-terminal	0.975046	0.78482	-6.02024	3.38621e-05	-3.20052	0.0130442		b	c	bc
BnaA02g30450D	Tetratricopeptide TPR-1;Tetratricopeptide-like helical;Tetratricopeptide repeat-containing domain;Tetratricopeptide repeat	0.50293	0.656193	-0.0844584	0.977677	2.68761	0.0349488			c	c
BnaA09g09460D	Histone H1/H5;Winged helix-turn-helix transcription repressor DNA-binding domain	1.70739	4.58114e-07	3.33724	3.21773e-07	2.1881	0.000314321	a	b	c	abc
BnaC01g10250D	Protein of unknown function DUF581	-1.05155	0.241246	-1.97307	0.0453674	-1.16243	0.193227		b		b
BnaA02g37020D	Aromatic-ring hydroxylase-like;FAD dependent oxidoreductase;Squalene epoxidase	-1.11645	0.443063	2.33923	0.021404	4.26052	6.43429e-07		b	c	bc
BnaC08g15840D	no data	0.655077	0.406374	1.33173	0.00126495	0.961262	0.0188012		b	c	bc
BnaC06g36410D	Gibberellin regulated protein	-0.82705	0.0200265	0.439144	0.691449	-0.0327276	0.973304	a			a
BnaC08g13040D	Mitochondrial carrier protein;Adenine nucleotide translocator 1;Mitochondrial substrate/solute carrier;Mitochondrial carrier domain	-1.71521	0.724431	4.07121	0.000380682	3.93215	2.87631e-05		b	c	bc
BnaA03g15610D	Dormancyauxin associated	0.839772	0.326285	2.21138	0.000122166	1.22944	0.0322227		b	c	bc
BnaC05g37470D	no data	0.766915	0.0242711	1.52359	0.0027581	1.40286	0.00420944	a	b	c	abc
BnaC04g45480D	DC1	-3.33298	0.472164	-2.94654	0.0104226	-1.64257	0.115543		b		b
BnaA02g05540D	No apical meristem (NAM) protein	-1.2346	0.845881	4.17117	1.98366e-06	4.63298	3.74787e-13		b	c	bc
BnaC06g27840D	Protein kinase, catalytic domain;Serine/threonine- / dual specificity protein kinase, catalytic domain;Serine/threonine-protein kinase, active site;Protein kinase-like domain;Concanavalin A-like lectin/glucanase, subgroup;Protein kinase, ATP binding site;Tyrosine-protein kinase, catalytic domain	0.445213	0.900597	-2.31358	0.00906076	0.0331635	0.978599		b		b
BnaA05g05560D	Protein of unknown function DUF1313	0.795465	0.927617	1.77097	0.0359627	2.42728	3.10746e-06		b	c	bc
BnaC02g36770D	no data	-0.182832	0.972096	0.798067	0.303643	1.21157	0.0390968			c	c
BnaA03g38920D	no data	0.836015	0.0507487	1.80966	6.5361e-05	0.717509	0.147031		b		b
BnaAnng17890D	SANT/Myb domain;Myb domain, plants;Homeodomain-like;Myb domain	-0.762654	0.0714927	-2.36078	7.45135e-14	-0.959094	0.0024505		b	c	bc
BnaCnng68220D	no data	-1.54574	0.0375269	-0.219772	0.972504	-2.22946	0.665486	a			a
BnaA09g22870D	Protein kinase-like domain;Choline/Ethanolamine kinase	0.232016	0.810728	0.900029	0.0220795	0.21411	0.658469		b		b
BnaC02g16530D	Disease resistance protein;NB-ARC;Powdery mildew resistance protein, RPW8 domain	-0.681342	0.278398	-0.0675304	0.954101	1.10734	0.019737			c	c
BnaC02g10050D	Plant lipid transfer protein/Par allergen;Bifunctional inhibitor/plant lipid transfer protein/seed storage helical domain	1.44002	0.294724	5.225	0.00032987	7.29466	4.43201e-08		b	c	bc
BnaC07g38310D	Protein BYPASS-related	-1.45634	0.475074	-1.65817	0.00762739	-1.10499	0.0437618		b	c	bc
BnaA04g00450D	Universal stress protein A;UspA;Rossmann-like alpha/beta/alpha sandwich fold	1.4217	0.000593167	1.77818	0.000160365	0.771818	0.13162	a	b		ab
BnaC08g16850D	Heat shock protein 70 family;Heat shock protein 70, conserved site	0.98744	0.00496639	1.55672	0.000613461	2.5068	1.5585e-09	a	b	c	abc
BnaC03g66380D	Male sterility, NAD-binding;NAD(P)-binding domain;Fatty acyl-CoA reductase	-1.23252	0.00593782	-1.04158	0.0172548	-1.79407	2.95669e-06	a	b	c	abc
BnaA03g42880D	Major pollen allergen Lol pI;Expansin, cellulose-binding-like domain;Expansin/Lol pI;Barwin-related endoglucanase	0.81098	0.729909	3.25065	0.000510785	2.76153	0.000626856		b	c	bc
BnaA06g32290D	no data	0.977441	0.336001	3.75248	2.88711e-08	4.02045	2.93355e-11		b	c	bc
BnaA06g35010D	no data	-1.34039	0.301428	-0.00055264	0.999676	1.34566	0.00137731			c	c
BnaC09g13680D	DNA-binding WRKY	-1.81234	0.0632899	-3.45947	0.00255824	-2.06219	0.0522977		b		b
BnaCnng78660D	Protein kinase, catalytic domain;Serine-threonine/tyrosine-protein kinase catalytic domain;Serine/threonine- / dual specificity protein kinase, catalytic domain;Serine/threonine-protein kinase, active site;Protein kinase-like domain;Concanavalin A-like lectin/glucanase, subgroup;Protein kinase, ATP binding site;Tyrosine-protein kinase, catalytic domain	-2.12597	0.601872	-8.00295	2.2061e-06	-3.80016	0.00207506		b	c	bc
BnaA09g43710D	DnaJ domain;Chaperone DnaJ, C-terminal;HSP40/DnaJ peptide-binding;DnaJ domain, conserved site	1.84739	6.09173e-07	2.29588	5.40214e-07	3.26952	2.21252e-14	a	b	c	abc
BnaA08g11840D	Disease resistance protein;Leucine-rich repeat;NB-ARC;Powdery mildew resistance protein, RPW8 domain	-0.0937766	0.956305	-1.39725	0.00755541	-0.797438	0.13774		b		b
BnaAnng38450D	Isochorismatase-like	2.69441	0.0782462	2.92559	0.004285	1.66343	0.0879825		b		b
BnaCnng23260D	Sucrose synthase;Glycosyl transferase, family 1;Sucrose synthase, plant/cyanobacteria	-0.920501	0.385455	1.16876	0.144733	1.72223	0.00815055			c	c
BnaA05g29310D	Glycosyltransferase, DXD sugar-binding motif;Alpha 1,4-glycosyltransferase domain	-1.56416	0.71693	-3.83598	0.000133172	-2.94589	0.00120556		b	c	bc
BnaA02g07110D	Plant lipid transfer protein/Par allergen;Bifunctional inhibitor/plant lipid transfer protein/seed storage helical domain	0.427298	0.389604	3.63794	0.00679666	5.6622	3.45399e-06		b	c	bc
BnaA09g00610D	Aldehyde oxidase/xanthine dehydrogenase, a/b hammerhead;2Fe-2S ferredoxin-type domain;Molybdopterin dehydrogenase, FAD-binding;[2Fe-2S]-binding;CO dehydrogenase flavoprotein, C-terminal;2Fe-2S ferredoxin, iron-sulphur binding site;Aldehyde oxidase/xanthine dehydrogenase, molybdopterin binding;Beta-grasp domain;FAD-binding, type 2;FAD-binding, type 2, subdomain 1;CO dehydrogenase flavoprotein-like…	0.0781699	0.990925	-3.61866	0.000897725	-2.63202	0.00873801		b	c	bc
BnaC03g01050D	no data	-0.307676	0.796619	-0.738004	0.135904	-2.03769	8.89148e-08			c	c
BnaA06g06370D	Armadillo;U box domain;Armadillo-like helical;Zinc finger, RING/FYVE/PHD-type;Armadillo-type fold	0.0392505	0.993081	-0.0881902	0.937278	1.10738	0.0146086			c	c
BnaA04g23880D	Methyltransferase type 11	-0.764486	0.747541	-3.48356	0.00972096	-1.93576	0.099922		b		b
BnaA06g18530D	Protein kinase, catalytic domain;Legume lectin domain;Serine/threonine- / dual specificity protein kinase, catalytic domain;Serine/threonine-protein kinase, active site;Concanavalin A-like lectin/glucanases superfamily;Protein kinase-like domain;Concanavalin A-like lectin/glucanase, subgroup;Protein kinase, ATP binding site;Tyrosine-protein kinase, catalytic domain	-0.339258	0.813875	-1.04685	0.0258641	-1.68806	2.78973e-05		b	c	bc
BnaC01g19480D	S-locus glycoprotein;Bulb-type lectin domain	-0.353508	0.899089	-0.652125	0.587877	-2.30092	0.00146863			c	c
BnaC01g19470D	Protein kinase, catalytic domain;Serine/threonine- / dual specificity protein kinase, catalytic domain;Apple-like;Serine/threonine-protein kinase, active site;Protein kinase-like domain;PAN-2 domain;Concanavalin A-like lectin/glucanase, subgroup;Tyrosine-protein kinase, catalytic domain	-0.0577242	0.991072	-0.610806	0.62263	-2.54815	0.000478274			c	c
BnaA06g33900D	Ribonuclease T2-like;Ribonuclease T2, active site	-2.95911	0.224009	-4.45163	1.4763e-05	-1.38215	0.0819914		b		b
BnaA09g39860D	Domain of unknown function CP12	0.511195	0.478067	1.42404	0.0141382	1.95188	0.000190374		b	c	bc
BnaA04g08110D	Peptidase A1;Peptidase aspartic, active site;Aspartic peptidase	-0.421183	0.550122	-0.0453323	0.960572	0.847735	0.0195269			c	c
BnaA06g39390D	Protein kinase, catalytic domain;Serine/threonine- / dual specificity protein kinase, catalytic domain;NAF domain;Serine/threonine-protein kinase, active site;Protein kinase-like domain;Protein kinase, ATP binding site;NAF/FISL domain;Tyrosine-protein kinase, catalytic domain;Calcium/calmodulin-dependent/calcium-dependent protein kinase	0.968595	0.0221264	0.630601	0.241013	1.01544	0.0149617	a		c	ac
BnaCnng63440D	Disease resistance protein;Leucine-rich repeat;NB-ARC	-0.518777	0.619049	-1.61099	0.00541811	-0.880526	0.138478		b		b
BnaC04g03780D	Glycoside hydrolase, family 1;Glycoside hydrolase, catalytic domain;Glycoside hydrolase, superfamily;Glycoside hydrolase, family 1, active site	0.26359	0.891876	-2.0817	0.054325	-2.20811	0.0142072			c	c
BnaA07g36820D	Methyltransferase type 11	-0.385456	0.859677	1.46161	0.130327	2.5123	0.00173873			c	c
BnaC02g45160D	Dehydrin	0.883599	0.802313	3.49967	0.0572667	6.06773	6.41529e-05			c	c
BnaC09g37560D	Blue (type 1) copper domain;Plastocyanin-like;Cupredoxin	0.0764048	0.996535	2.18658	0.111374	3.24219	0.00375262			c	c
BnaC08g32210D	Domain of unknown function CP12	0.385431	0.606445	1.4065	0.0322635	2.12356	0.000186625		b	c	bc
BnaA01g12060D	Plastid lipid-associated protein/fibrillin conserved domain	-0.0610723	0.972405	0.673509	0.394287	1.54426	0.00459642			c	c
BnaC09g24050D	Aminotransferases, class-I, pyridoxal-phosphate-binding site;Aminotransferase, class I/classII;Pyridoxal phosphate-dependent transferase, major region, subdomain 1;Pyridoxal phosphate-dependent transferase, major region, subdomain 2;Pyridoxal phosphate-dependent transferase	0.990081	0.522791	0.34101	0.725516	1.1187	0.0429392			c	c
BnaC03g48070D	Senescence/spartin-associated	-2.84753	0.0471103	0.905603	0.178155	1.60772	0.0024356	a		c	ac
BnaA01g18580D	Domain of unknown function DUF221	-0.465677	0.45003	-1.31571	2.55349e-05	-1.10928	0.000238591		b	c	bc
BnaC03g37570D	Glycoside hydrolase, family 19, catalytic;Chitin-binding, type 1;Glycoside hydrolase, family 19;Chitin-binding, type 1, conserved site;Lysozyme-like domain	-0.344559	0.695494	0.447515	0.716949	2.54228	6.85502e-05			c	c
BnaA07g28440D	Protein of unknown function DUF569;Actin cross-linking	-2.45828	0.325601	-2.06854	0.0242432	-1.07041	0.223383		b		b
BnaC08g20820D	Plant peroxidase;Haem peroxidase, plant/fungal/bacterial;Haem peroxidase;Peroxidases heam-ligand binding site;Peroxidase, active site	-0.222727	0.888337	-0.501805	0.467651	-1.01292	0.0328375			c	c
BnaA02g02200D	Major facilitator superfamily;Major facilitator superfamily domain, general substrate transporter;Major facilitator superfamily domain	0.286961	0.838899	0.688921	0.276003	1.3126	0.00383213			c	c
BnaA01g12380D	Cytochrome P450;Cytochrome P450, E-class, group I;Cytochrome P450, conserved site	-0.364075	0.889918	-0.654167	0.214294	-1.98642	2.69028e-07			c	c
BnaC01g09930D	Protein kinase, catalytic domain;Serine/threonine- / dual specificity protein kinase, catalytic domain;Serine/threonine-protein kinase, active site;Protein kinase-like domain;Protein kinase, ATP binding site;Tyrosine-protein kinase, catalytic domain	0.317572	0.943886	-3.75597	0.00123468	-2.09189	0.0549168		b		b
BnaC06g40700D	Tetratricopeptide-like helical	-0.552393	0.800235	1.84869	0.0390275	1.98956	0.00778425		b	c	bc
BnaA01g16330D	Protein kinase, catalytic domain;Serine/threonine- / dual specificity protein kinase, catalytic domain;Apple-like;Serine/threonine-protein kinase, active site;Protein kinase-like domain;PAN-2 domain;Concanavalin A-like lectin/glucanase, subgroup;Tyrosine-protein kinase, catalytic domain	-0.262345	0.93587	-1.17291	0.141264	-3.57201	3.44055e-08			c	c
BnaA05g10540D	Leucine-rich repeat;Leucine-rich repeat, typical subtype;Leucine rich repeat 4	0.907827	0.405278	1.71139	0.0181363	1.28475	0.0682278		b		b
BnaC03g27360D	no data	-0.103867	0.979221	-1.70455	0.0270859	-2.35576	0.000479973		b	c	bc
BnaA05g34000D	Band 7 protein;Stomatin	0.696533	0.775468	-6.33582	0.000485941	-2.75287	0.105168		b		b
BnaC02g04180D	Alpha crystallin/Hsp20 domain;HSP20-like chaperone	1.43541	0.133678	4.72876	7.07135e-25	6.74421	3.68107e-40		b	c	bc
BnaC03g34720D	Autophagy protein Atg8 ubiquitin-like	0.377552	0.587367	-1.59519	0.00768151	-0.717931	0.292004		b		b
BnaC05g04430D	Alpha crystallin/Hsp20 domain;HSP20-like chaperone	0.433019	0.584079	2.10751	0.000226771	2.13854	5.91775e-05		b	c	bc
BnaC05g09910D	Protein of unknown function DUF1262	-4.32109	0.0188258	1.38442	0.187418	1.85435	0.0316261	a		c	ac
BnaA09g04550D	Protein kinase, catalytic domain;Serine-threonine/tyrosine-protein kinase catalytic domain;Serine/threonine- / dual specificity protein kinase, catalytic domain;Protein kinase-like domain;Tyrosine-protein kinase, catalytic domain	-2.59577	0.188833	-1.07148	0.1532	-1.2598	0.0301384			c	c
BnaC05g23260D	Lipase, class 3	-0.605427	0.929681	-1.53669	0.0885195	-1.51912	0.0404908			c	c
BnaA02g34980D	no data	0.0442849	0.995372	0.799851	0.239202	1.14089	0.0357651			c	c
BnaA01g16380D	Dynein light chain, type 1/2	-1.42037	0.000235816	-1.5415	0.0134644	-0.727778	0.270408	a	b		ab
BnaC03g67380D	DNA-binding WRKY	-2.48506	0.0100952	-6.84558	1.39172e-05	-5.85771	1.45456e-05	a	b	c	abc
BnaC08g30720D	no data	-0.542797	0.83377	0.102614	0.943788	1.25779	0.0317269			c	c
BnaA01g05120D	O-methyltransferase, family 2;Winged helix-turn-helix transcription repressor DNA-binding domain;Caffeate O-methyltransferase (COMT) family	1.44762	6.8879e-05	2.22275	0.004285	3.59005	1.7575e-06	a	b	c	abc
BnaC04g08270D	UDP-glucuronosyl/UDP-glucosyltransferase	-1.06478	0.0183384	-1.70412	0.00161103	-1.24463	0.0206747	a	b	c	abc
BnaC03g65100D	Cytochrome P450;Cytochrome P450, E-class, group I;Cytochrome P450, conserved site	-0.522909	0.731398	-1.48709	0.00248524	-2.12755	2.15748e-06		b	c	bc
BnaA08g26630D	C2 calcium-dependent membrane targeting;C2 calcium/lipid-binding domain, CaLB;Annexin, type VII	-1.21517	0.508853	-0.978418	0.127824	-1.13556	0.0386476			c	c
BnaC04g07310D	SOUL haem-binding protein;Regulatory factor, effector, bacterial	1.33841	7.28178e-06	1.49657	0.00373885	1.39093	0.00496069	a	b	c	abc
BnaA03g20180D	Calcium-binding EF-hand;EF-hand-like domain;EF-Hand 1, calcium-binding site	-0.909468	0.246491	-1.02715	0.0525687	-1.0309	0.0306016			c	c
BnaCnng26490D	Coiled-coil domain containing protein 109, C-terminal	1.40874	0.203793	1.23834	0.132865	1.63168	0.0167419			c	c
BnaC04g23290D	Pectinesterase, catalytic;Pectin lyase fold/virulence factor;Pectin lyase fold;Pectinesterase, active site	-0.682744	0.758908	-3.20705	0.00128259	-2.91696	0.00151248		b	c	bc
BnaA04g05470D	Target SNARE coiled-coil domain;Syntaxin, N-terminal;Syntaxin/epimorphin, conserved site;t-SNARE	0.694172	0.916576	-2.37208	0.00565534	-0.479196	0.623594		b		b
BnaC03g02540D	Late embryogenesis abundant protein, LEA-14	0.437755	0.950031	-2.49943	0.00576784	-1.29367	0.135348		b		b
BnaA07g12410D	Coiled-coil domain containing protein 109, C-terminal	1.03137	0.429706	1.00016	0.185119	1.34283	0.0298881			c	c
BnaC04g55960D	Peptidase A1;Peptidase aspartic, active site;Aspartic peptidase	-0.323452	0.79051	0.0518402	0.958933	0.985753	0.011872			c	c
BnaC05g48690D	Band 7 protein;Stomatin	-0.2167	0.964389	-1.96345	0.00984091	-0.320942	0.733444		b		b
BnaA03g19450D	no data	0.187756	0.957076	-2.67714	0.0109719	-0.966457	0.373477		b		b
BnaC03g52400D	No apical meristem (NAM) protein	-0.238585	0.961584	1.00898	0.346656	1.6933	0.0377932			c	c
BnaA01g20790D	Cysteine peptidase, cysteine active site;Peptidase C1A, papain C-terminal;Peptidase C1A, papain;Proteinase inhibitor I29, cathepsin propeptide;Cysteine peptidase, histidine active site;Cysteine peptidase, asparagine active site	-0.0242778	1	-2.3892	0.0116417	-0.212953	0.862981		b		b
BnaCnng68540D	Multi antimicrobial extrusion protein	-0.853242	0.0186378	-0.4258	0.751008	0.339041	0.740574	a			a
BnaC08g18820D	Protein kinase, catalytic domain;EGF-like calcium-binding;Serine/threonine- / dual specificity protein kinase, catalytic domain;Serine/threonine-protein kinase, active site;Protein kinase-like domain;Wall-associated kinase;EGF-like calcium-binding, conserved site;Tyrosine-protein kinase, catalytic domain	-1.03815	0.502664	-1.48903	0.00044362	0.142351	0.781387		b		b
BnaA03g34680D	Cyclic nucleotide-binding domain;Ion transport domain;RmlC-like jelly roll fold;Cyclic nucleotide-binding-like	-0.97589	0.387442	-4.96284	1.07299e-05	-4.66129	6.20443e-06		b	c	bc
BnaA04g20720D	Glycosyl transferase, family 8	-1.75072	0.612399	-3.2451	0.00349867	-3.07541	0.00102602		b	c	bc
BnaC08g48040D	Terpene synthase, metal-binding domain;Terpenoid synthase	1.88578	0.0486844	2.38861	0.000163286	2.38199	2.87803e-05	a	b	c	abc
BnaC08g37440D	NADH:flavin oxidoreductase/NADH oxidase, N-terminal;Immunoglobulin-like domain;Aldolase-type TIM barrel	0.0832834	0.998918	1.46241	0.0702928	1.45746	0.023507			c	c
BnaCnng21510D	no data	0.120429	0.959095	-2.15993	0.0185158	-0.742141	0.447975		b		b
BnaC08g15760D	no data	0.158631	0.897091	0.560828	0.159826	0.666561	0.0439477			c	c
BnaC08g11270D	Domain of unknown function DUF250	0.103155	0.962658	1.10127	0.035705	0.746908	0.147492		b		b
BnaA02g02530D	no data	0.439682	0.954395	1.01391	0.415203	2.35212	0.00509478			c	c
BnaC02g03280D	no data	2.33204	0.166631	3.11933	2.414e-07	3.0785	5.27544e-09		b	c	bc
BnaC04g00750D	Helix-turn-helix motif;Homeodomain;Leucine zipper, homeobox-associated;Homeodomain-like;Homeobox, conserved site	-0.179678	0.970595	2.32717	0.00776295	2.69892	0.00044148		b	c	bc
BnaAnng18720D	ATPase, AAA-type, core;ATPase, AAA-type, conserved site	0.638331	0.707156	-1.9243	0.00174279	-0.461311	0.522068		b		b
BnaA06g18620D	Peptidase S10, serine carboxypeptidase;Peptidase S10, serine carboxypeptidase, active site	-1.12252	0.0248746	-0.543826	0.246556	0.0211588	0.971217	a			a
BnaA03g09920D	Lipocalin/cytosolic fatty-acid binding protein domain;Lipocalin, bacterial;Calycin-like;Calycin;Lipocalin, ApoD type;Lipocalin conserved site	0.825573	0.0933182	1.99552	1.94671e-06	2.04577	1.39302e-07		b	c	bc
BnaC03g08260D	Squalene/phytoene synthase;Terpenoid synthase;Squalene/phytoene synthase, conserved site	-0.0187941	0.999466	-1.61845	0.00439628	-1.23927	0.0317633		b	c	bc
BnaC03g51090D	Metallophosphoesterase domain;Phosphoesterase At2g46880	-0.864092	0.277653	-2.58288	0.0051598	-1.46645	0.0966017		b		b
BnaA10g01000D	Myc-type, basic helix-loop-helix (bHLH) domain	0.919443	0.114031	0.433453	0.661197	1.62275	0.00343579			c	c
BnaCnng39500D	Protein kinase, catalytic domain;Serine/threonine- / dual specificity protein kinase, catalytic domain;Serine/threonine-protein kinase, active site;Protein kinase-like domain;Tyrosine-protein kinase, catalytic domain	0.245959	0.94821	-2.27725	0.00287292	-0.662636	0.431664		b		b
BnaC04g00040D	Zinc finger, B-box;CCT domain	0.539237	0.771031	0.795023	0.276098	1.17116	0.0376039			c	c
BnaAnng39320D	Tetratricopeptide-like helical;Tetratricopeptide repeat-containing domain;Tetratricopeptide TPR2;Tetratricopeptide repeat	3.13545	0.0366361	-0.771332	0.79428	1.48631	0.478402	a			a
BnaCnng46690D	Aldehyde oxidase/xanthine dehydrogenase, a/b hammerhead;2Fe-2S ferredoxin-type domain;Molybdopterin dehydrogenase, FAD-binding;[2Fe-2S]-binding;CO dehydrogenase flavoprotein, C-terminal;2Fe-2S ferredoxin, iron-sulphur binding site;Aldehyde oxidase/xanthine dehydrogenase, molybdopterin binding;Beta-grasp domain;FAD-binding, type 2;FAD-binding, type 2, subdomain 1;CO dehydrogenase flavoprotein-like…	0.908255	0.686234	-4.56782	0.00207441	-3.51845	0.00903377		b	c	bc
BnaC07g38730D	Oligopeptide transporter OPT superfamily	-0.128351	0.981122	-6.72267	0.00119802	-4.21159	0.0127206		b	c	bc
BnaC02g38520D	Protein kinase, catalytic domain;Serine-threonine/tyrosine-protein kinase catalytic domain;Leucine-rich repeat;Serine/threonine- / dual specificity protein kinase, catalytic domain;Protein kinase-like domain;Concanavalin A-like lectin/glucanase, subgroup;Tyrosine-protein kinase, catalytic domain	-1.04867	0.559576	-1.86673	0.0217204	-0.530599	0.546712		b		b
BnaC03g00860D	Transmembrane receptor, eukaryota	-1.98788	0.779354	-3.52755	0.000781736	-2.3416	0.00261361		b	c	bc
BnaC06g34670D	Protein kinase, catalytic domain;Serine-threonine/tyrosine-protein kinase catalytic domain;Serine/threonine- / dual specificity protein kinase, catalytic domain;Serine/threonine-protein kinase, active site;Protein kinase-like domain;Tyrosine-protein kinase, catalytic domain	-1.06922	0.383661	-1.7224	0.00933744	-0.584992	0.410784		b		b
BnaA03g34270D	Zinc finger, RING-type;Zinc finger, RING/FYVE/PHD-type	-1.77511	0.67031	-2.72939	0.00334633	-2.24694	0.00736783		b	c	bc
BnaCnng04830D	O-methyltransferase, family 3	-0.544763	0.200892	-0.1416	0.910035	-1.25095	0.034101			c	c
BnaC04g28440D	Calcium-binding EF-hand;EF-hand-like domain;EF-Hand 1, calcium-binding site	-0.210508	0.926112	-1.91957	0.0081124	-1.34756	0.0504088		b		b
BnaC05g00460D	Cytochrome P450;Cytochrome P450, E-class, group I;Cytochrome P450, conserved site	-0.471494	0.83361	0.239398	0.819245	1.33836	0.0102027			c	c
BnaA04g18600D	Protein kinase, catalytic domain;Serine/threonine- / dual specificity protein kinase, catalytic domain;Serine/threonine-protein kinase, active site;Protein kinase-like domain;Tyrosine-protein kinase, catalytic domain	0.0278792	1	-1.92678	0.00709047	-0.546542	0.500002		b		b
BnaA02g03140D	Glutamine synthetase, catalytic domain;Glutamine synthetase, beta-Grasp;Glutamine synthetase/guanido kinase, catalytic domain;Glutamine synthetase, N-terminal conserved site;Glutamine synthetase, glycine-rich site	-0.909937	0.107291	-2.23536	0.000177138	-2.34364	2.49915e-05		b	c	bc
BnaA09g29590D	no data	-1.53192	0.0635795	-2.87425	0.000256782	-2.01189	0.00811643		b	c	bc
BnaC05g12860D	no data	0.760908	0.785514	2.49449	0.000798907	2.38996	0.000264667		b	c	bc
BnaAnng20610D	DnaJ domain;DnaJ domain, conserved site	1.31639	0.405062	2.99604	2.51602e-06	4.21893	3.68119e-13		b	c	bc
BnaA01g16310D	Calcium-binding EF-hand;NADPH-dependent FMN reductase;EF-hand-like domain;EF-Hand 1, calcium-binding site	1.11825	0.405682	0.727801	0.220787	0.963469	0.0448711			c	c
BnaUnng05060D	RNA recognition motif domain;Nucleotide-binding, alpha-beta plait	1.29676	0.0919834	2.44488	1.82634e-06	1.77995	0.000246827		b	c	bc
BnaCnng23520D	Late embryogenesis abundant protein, LEA-14;Immunoglobulin-like fold;Water stress and hypersensitive response domain	-1.48002	0.452631	0.513292	0.475577	1.98613	4.58329e-06			c	c
BnaC01g43110D	Armadillo;U box domain;Armadillo-like helical;Zinc finger, RING/FYVE/PHD-type;Armadillo-type fold	0.647606	0.740848	0.460853	0.8389	2.21196	0.0414981			c	c
BnaC03g26780D	Protein of unknown function DUF1645	1.97402	0.448306	-1.92353	0.00104135	-1.90608	0.000372323		b	c	bc
BnaA05g31870D	GDP-fucose protein O-fucosyltransferase	-0.486631	0.885883	-0.426987	0.65291	-1.21222	0.0182732			c	c
BnaC05g01200D	Oxoglutarate/iron-dependent dioxygenase;Non-haem dioxygenase N-terminal domain	-1.52388	0.585583	0.464672	0.632945	1.3595	0.0176594			c	c
BnaA02g36540D	Protein kinase, catalytic domain;Legume lectin domain;Serine/threonine- / dual specificity protein kinase, catalytic domain;Serine/threonine-protein kinase, active site;Concanavalin A-like lectin/glucanases superfamily;Protein kinase-like domain;Concanavalin A-like lectin/glucanase, subgroup;Protein kinase, ATP binding site;Tyrosine-protein kinase, catalytic domain	-0.43177	0.892579	-2.80178	0.00691552	-2.24408	0.0218242		b	c	bc
BnaA05g14880D	t-SNARE	-0.51758	0.262738	0.324659	0.733419	2.00877	5.22413e-05			c	c
BnaA10g15900D	Domain of unknown function DUF3700	1.10222	0.0426758	0.833867	0.206713	0.494991	0.430318	a			a
BnaC01g35040D	Basic-leucine zipper domain	-0.36627	0.58202	-1.57135	0.0250106	-0.701987	0.356597		b		b
BnaC06g22060D	Lipase, GDSL;Lipase, GDSL, active site;SGNH hydrolase-type esterase domain	0.320303	0.969103	0.957826	0.512702	2.37369	0.0120728			c	c
BnaA06g09760D	no data	-2.10721	0.591118	1.19208	0.307838	1.72386	0.0467734			c	c
BnaA03g48270D	AP2/ERF domain;DNA-binding, integrase-type	2.18121	0.579353	1.32192	0.190042	1.82817	0.020984			c	c
BnaCnng35830D	Protein kinase, catalytic domain;Serine-threonine/tyrosine-protein kinase catalytic domain;Leucine-rich repeat;Serine/threonine- / dual specificity protein kinase, catalytic domain;Serine/threonine-protein kinase, active site;Protein kinase-like domain;Concanavalin A-like lectin/glucanase, subgroup;Tyrosine-protein kinase, catalytic domain;Malectin	-0.977741	0.287338	-0.960407	0.125603	-1.20588	0.0220906			c	c
BnaA08g06440D	Protein kinase, catalytic domain;S-locus glycoprotein;Bulb-type lectin domain;Serine/threonine- / dual specificity protein kinase, catalytic domain;Serine/threonine-protein kinase, active site;Protein kinase-like domain;Concanavalin A-like lectin/glucanase, subgroup;Protein kinase, ATP binding site;Tyrosine-protein kinase, catalytic domain	-0.00100965	1	-0.873261	0.0616791	-1.02477	0.0125516			c	c
BnaA05g27950D	Wound-induced protein, Wun1	0.405795	0.789604	0.355047	0.610338	1.13344	0.00422588			c	c
BnaAnng05900D	Plant lipid transfer protein/Par allergen;Bifunctional inhibitor/plant lipid transfer protein/seed storage helical domain	-2.27317	0.0410528	-1.09205	0.574698	0.58634	0.66629	a			a
BnaC07g35150D	Domain of unknown function DUF250	-0.662454	0.801671	-2.8658	0.000739146	-3.15875	4.58672e-05		b	c	bc
BnaA10g20100D	LPS-induced tumor necrosis factor alpha factor	0.0270308	0.999466	-1.8267	0.01633	-0.360419	0.686746		b		b
BnaA03g08510D	No apical meristem (NAM) protein	-1.94428	0.54511	-4.46239	0.00177023	-1.78345	0.156503		b		b
BnaAnng18710D	AAA-type ATPase, N-terminal domain	0.282073	0.921586	-2.11988	0.000328269	-0.535439	0.430654		b		b
BnaC07g15280D	Catalase haem-binding site;Catalase immune-responsive domain;Catalase core domain;Catalase, mono-functional, haem-containing;Catalase-like domain	0.736198	0.0183384	1.21481	0.00541811	1.3455	0.00107584	a	b	c	abc
BnaA01g08400D	no data	-1.65666	0.728359	-4.21353	0.000613461	-2.72384	0.014542		b	c	bc
BnaA01g09690D	Heat shock factor (HSF)-type, DNA-binding;Winged helix-turn-helix transcription repressor DNA-binding domain	-0.210098	0.977384	-2.91333	0.00542566	-1.51659	0.127511		b		b
BnaA04g05850D	Calcium-binding EF-hand;EF-hand-like domain;EF-Hand 1, calcium-binding site	-0.166977	0.936872	-1.60986	0.0187165	-1.11936	0.0890132		b		b
BnaA08g07510D	Rapid ALkalinization Factor	0.688844	0.33286	0.288801	0.744495	1.06544	0.0282495			c	c
BnaC07g24080D	no data	-0.350147	0.935805	0.728658	0.353821	1.39446	0.0135258			c	c
BnaC04g01210D	DNA-binding WRKY	0.466977	0.800066	-2.15976	0.0261098	-1.05675	0.260092		b		b
BnaA04g23090D	Alpha/beta hydrolase fold-1;Alpha/beta hydrolase, N-terminal	-1.17032	0.753308	0.974401	0.424977	2.14257	0.00999663			c	c
BnaA10g21890D	Zinc finger, RING-type;Zinc finger, RING/FYVE/PHD-type	0.256025	0.95405	-1.62461	0.0119919	-0.875269	0.175425		b		b
BnaCnng24080D	Protein of unknown function DUF569;Actin cross-linking	-0.0665453	0.996375	-1.01025	0.4194	-1.88696	0.0254248			c	c
BnaC04g46780D	Transferase;Chloramphenicol acetyltransferase-like domain	-0.844959	0.222344	0.334168	0.817772	2.43571	0.000303172			c	c
BnaA03g25330D	Toll/interleukin-1 receptor homology (TIR) domain;Disease resistance protein;NB-ARC;AAA+ ATPase domain;Leucine-rich repeat 3	0.371219	0.908423	0.212095	0.861646	1.34255	0.011284			c	c
BnaA03g10550D	Glycoside hydrolase, family 35;Glycoside hydrolase, catalytic domain;Glycoside hydrolase, superfamily;Glycoside hydrolase, family 35, conserved site	2.44437	0.0118519	1.64874	0.0928679	0.201426	0.875719	a			a
BnaC01g41430D	IQ motif, EF-hand binding site;Domain of unknown function DUF4005	-0.539283	0.531338	-1.16852	0.091488	-1.39324	0.0170649			c	c
BnaC05g41830D	Protein phosphatase 2C, manganese/magnesium aspartate binding site;Protein phosphatase 2C (PP2C)-like;Protein phosphatase 2C	0.856868	0.233251	1.50181	0.0486269	2.02773	0.00192728		b	c	bc
BnaC06g15000D	no data	-0.363772	0.926069	0.559626	0.59359	1.34454	0.031845			c	c
BnaCnng50730D	Amino acid/polyamine transporter I;Cationic amino acid transporter	0.569301	0.557622	1.53659	0.000441543	1.08083	0.00939938		b	c	bc
BnaC09g01730D	AAA-type ATPase, N-terminal domain	0.21341	0.963396	-3.08565	0.0227626	-1.93225	0.0971245		b		b
BnaC05g19420D	Domain of unknown function DUF23	-0.0516967	0.984484	0.435115	0.525743	0.978459	0.026452			c	c
BnaC01g05300D	Peptidase C13, legumain	-0.180868	0.922763	-1.16145	0.0778434	-2.90221	8.39871e-08			c	c
BnaC04g36340D	Zinc finger, RING/FYVE/PHD-type	0.934691	0.867669	0.920908	0.272562	1.18969	0.0261403			c	c
BnaCnng26720D	no data	-2.068	3.3966e-10	-1.1822	0.0143166	-1.31193	0.00321522	a	b	c	abc
BnaA01g11780D	Nucleic acid-binding, OB-fold;Replication factor A, C-terminal	0.776962	0.764283	3.18395	2.80302e-05	3.79702	1.31458e-08		b	c	bc
BnaC02g02310D	no data	4.54799	0.124553	2.29222	0.026728	1.82351	0.0406919		b	c	bc
BnaC05g05850D	no data	1.77842	0.00169308	1.46865	0.0711725	-0.59036	0.484832	a			a
BnaA06g25320D	Myc-type, basic helix-loop-helix (bHLH) domain	0.636193	0.10082	1.79	6.50594e-06	0.582842	0.212588		b		b
BnaA10g22250D	ABC transporter-like;AAA+ ATPase domain;ABC transporter, conserved site	-0.144619	0.989956	0.0171787	0.99409	1.83225	0.0384785			c	c
BnaCnng76190D	no data	1.0927	0.5665	0.676231	0.408591	1.35928	0.0179631			c	c
BnaC07g13830D	Protein phosphatase 2C (PP2C)-like;Protein phosphatase 2C	-0.355483	0.77006	-1.45495	0.019177	-1.11758	0.0553676		b		b
BnaA02g20700D	Mlo-related protein	-4.42142	0.0252706	-0.94221	0.244456	-0.926762	0.139118	a			a
BnaA08g10430D	Cytochrome P450;Cytochrome P450, E-class, group I;Cytochrome P450, conserved site	-0.801724	0.617167	-2.13518	8.25371e-05	-2.56711	3.54275e-07		b	c	bc
BnaA06g28030D	Histone deacetylase superfamily;Histone deacetylase domain	0.195657	0.957037	1.20421	0.0282205	1.17246	0.0110749		b	c	bc
BnaA03g23170D	Phospholipase-like, arabidopsis	-0.572422	0.847457	-2.27176	0.0233363	-0.858522	0.402221		b		b
BnaC08g01820D	Alpha crystallin/Hsp20 domain	0.854152	0.589561	3.29073	0.00095064	3.35621	2.87169e-05		b	c	bc
BnaC09g01790D	Protein kinase, catalytic domain;Serine/threonine- / dual specificity protein kinase, catalytic domain;Putative S-adenosyl-L-methionine-dependent methyltransferase MidA;Serine/threonine-protein kinase, active site;Protein kinase-like domain;Protein kinase, ATP binding site;Tyrosine-protein kinase, catalytic domain	0.0614258	0.97967	0.537041	0.265217	0.851014	0.0180176			c	c
BnaC01g11370D	Heat shock factor (HSF)-type, DNA-binding;Winged helix-turn-helix transcription repressor DNA-binding domain	0.915483	0.837025	-4.54312	0.00127231	-3.29134	0.00892413		b	c	bc
BnaC05g04830D	Exocyst complex protein Exo70;Cullin repeat-like-containing domain	0.30674	0.954267	-3.53115	0.000274017	-2.28672	0.00862997		b	c	bc
BnaC09g01740D	AAA+ ATPase domain;ATPase, AAA-type, core;ATPase, AAA-type, conserved site	0.443975	0.88107	-3.10705	0.00231786	-1.8674	0.0463007		b	c	bc
BnaC03g52390D	no data	0.58114	0.852199	0.812684	0.362588	1.44987	0.0276557			c	c
BnaC08g48860D	Protein kinase, catalytic domain;Serine-threonine/tyrosine-protein kinase catalytic domain;Serine/threonine- / dual specificity protein kinase, catalytic domain;Tyrosine-protein kinase, active site;Protein kinase-like domain;Protein kinase, ATP binding site;Tyrosine-protein kinase, catalytic domain	-1.58967	0.526068	0.973638	0.296594	1.66088	0.0199719			c	c
BnaCnng32080D	Carotenoid oxygenase	0.715966	0.78413	1.0803	0.07903	1.47398	0.00125324			c	c
BnaC08g30510D	Engulfment/cell motility, ELMO	-0.792549	0.738399	-0.389685	0.768609	1.66663	0.014268			c	c
BnaA03g44460D	Terpene synthase, N-terminal domain;Terpene synthase, metal-binding domain;Terpenoid cyclases/protein prenyltransferase alpha-alpha toroid;Terpenoid synthase	0.365633	0.905409	2.27266	0.000341567	2.32745	3.90367e-05		b	c	bc
BnaA05g27660D	Protein phosphatase 2C, manganese/magnesium aspartate binding site;Protein phosphatase 2C (PP2C)-like;Protein phosphatase 2C	0.875371	0.403434	1.21832	0.120853	1.44409	0.0291677			c	c
BnaA07g31480D	Protein kinase, catalytic domain;Serine/threonine- / dual specificity protein kinase, catalytic domain;Leucine-rich repeat, typical subtype;Serine/threonine-protein kinase, active site;Protein kinase-like domain;Concanavalin A-like lectin/glucanase, subgroup;Protein kinase, ATP binding site;Tyrosine-protein kinase, catalytic domain;Leucine rich repeat 4	0.463572	0.621531	-1.58842	0.0434705	-1.45389	0.0379096		b	c	bc
BnaA05g10550D	Leucine-rich repeat	-2.81437	0.627448	-2.6637	0.000500587	-1.01907	0.125936		b		b
BnaC02g48560D	BURP domain	-0.381983	0.678563	1.04852	0.123961	1.69525	0.00201624			c	c
BnaA01g29390D	Carotenoid oxygenase	0.520516	0.87085	1.20503	0.407973	2.1736	0.0234817			c	c
BnaC03g32010D	C2 calcium-dependent membrane targeting;C2 calcium/lipid-binding domain, CaLB;Phosphoribosyltransferase C-terminal;C2 membrane targeting protein	-0.61722	0.952054	-4.7335	0.000849464	-1.45538	0.266683		b		b
BnaA09g00780D	Protein kinase, catalytic domain;Legume lectin domain;Serine/threonine- / dual specificity protein kinase, catalytic domain;Serine/threonine-protein kinase, active site;Concanavalin A-like lectin/glucanases superfamily;Protein kinase-like domain;Concanavalin A-like lectin/glucanase, subgroup;Tyrosine-protein kinase, catalytic domain	-0.0408914	0.998941	-1.55881	0.01518	-1.36465	0.0242891		b	c	bc
BnaCnng19190D	Protein kinase, catalytic domain;Legume lectin domain;Serine/threonine- / dual specificity protein kinase, catalytic domain;Serine/threonine-protein kinase, active site;Concanavalin A-like lectin/glucanases superfamily;Protein kinase-like domain;Concanavalin A-like lectin/glucanase, subgroup;Tyrosine-protein kinase, catalytic domain	-0.401356	0.949467	-3.2174	0.00137227	-1.70651	0.073807		b		b
BnaA01g29290D	C2 calcium-dependent membrane targeting;C2 calcium/lipid-binding domain, CaLB;C2 membrane targeting protein;C2 domain	-0.973768	0.735713	0.395999	0.724258	1.46513	0.0148015			c	c
BnaC09g51080D	no data	-0.83335	0.685933	-5.02445	2.92184e-05	-3.31385	0.00115736		b	c	bc
BnaA04g01780D	Pectinesterase, catalytic;Pectin lyase fold/virulence factor;Pectin lyase fold;Pectinesterase, active site	-0.0412698	1	-5.2991	0.000171758	-3.55741	0.00560568		b	c	bc
BnaC06g17850D	Zinc finger, GATA-type;Zinc finger, NHR/GATA-type;Transcription factor, GATA, plant	0.437933	0.794606	1.06862	0.0462644	1.26645	0.00753834		b	c	bc
BnaA07g21320D	Protein of unknown function DUF4228	-2.31263	0.406418	-2.05252	0.0338474	-0.942254	0.297939		b		b
BnaA07g19610D	ABC transporter-like;AAA+ ATPase domain;ABC-2 type transporter;Plant PDR ABC transporter associated	-0.514385	0.869783	-2.26282	0.048657	-1.84109	0.0589425		b		b
BnaAnng31370D	Protein phosphatase 2C (PP2C)-like;Protein phosphatase 2C	-1.42199	0.333635	-2.32546	0.000192876	-1.73418	0.00269344		b	c	bc
BnaA09g32910D	U box domain;Armadillo-like helical;Zinc finger, RING/FYVE/PHD-type;Armadillo-type fold	-0.564839	0.921532	-1.65174	0.0215657	-1.42504	0.0296065		b	c	bc
BnaC01g15640D	DNA-binding WRKY	0.278833	0.962126	-3.61994	0.0135785	-1.66112	0.193698		b		b
BnaA04g23480D	DNA-binding WRKY	0.605408	0.61068	-3.04922	0.000903837	-1.38384	0.125492		b		b
BnaC05g19230D	Peptidase M10, metallopeptidase;Peptidoglycan binding-like;Peptidase, metallopeptidase;Peptidase M10A, cysteine switch, zinc binding site;Peptidase M10A;Metallopeptidase, catalytic domain	-1.12556	0.885172	-2.04188	0.0443403	-0.282986	0.806901		b		b
BnaC03g60970D	No apical meristem (NAM) protein	0.513806	0.752938	-0.980149	0.282218	-1.51666	0.0249228			c	c
BnaC04g46930D	Protein kinase, catalytic domain;Serine-threonine/tyrosine-protein kinase catalytic domain;Serine/threonine- / dual specificity protein kinase, catalytic domain;Protein kinase-like domain;Concanavalin A-like lectin/glucanase, subgroup;Tyrosine-protein kinase, catalytic domain	-0.546389	0.65689	-2.19283	0.00397846	-1.4458	0.0477684		b	c	bc
BnaA07g06240D	Selenium-binding protein;WD40/YVTN repeat-like-containing domain	4.532	0.129145	1.14457	0.337555	1.74038	0.0339843			c	c
BnaC04g12970D	Toll/interleukin-1 receptor homology (TIR) domain;Disease resistance protein;NB-ARC;Leucine-rich repeat 3	-0.635079	0.943886	-7.62401	1.40996e-05	-3.57739	0.00563236		b	c	bc
BnaA01g22240D	Armadillo;U box domain;Armadillo-like helical;Zinc finger, RING/FYVE/PHD-type;Armadillo-type fold	0.153844	0.976499	-0.234837	0.881849	1.64592	0.0196886			c	c
BnaAnng21800D	Zinc finger, AN1-type;Zinc finger, A20-type	0.318969	0.869783	0.837834	0.115082	1.34393	0.00169271			c	c
BnaA01g26050D	Amino acid/polyamine transporter I	-0.00222035	1	-0.203795	0.766799	-0.911255	0.00727758			c	c
BnaA02g35750D	Protein of unknown function DUF569;Actin cross-linking	0.133405	0.987259	-2.16807	0.0114201	-1.23325	0.124404		b		b
BnaC09g04500D	Phosphatidylinositol 3-/4-kinase, catalytic domain;Ubiquitin	-0.881429	0.634303	-3.25162	0.000230074	-2.48275	0.0021947		b	c	bc
BnaA04g07800D	Amino acid/polyamine transporter I;Cationic amino acid transporter	0.361419	0.587974	0.946601	0.0140701	0.776434	0.0377188		b	c	bc
BnaC04g30430D	C2 calcium-dependent membrane targeting;C2 calcium/lipid-binding domain, CaLB;C2 membrane targeting protein	-2.3549	0.54474	-2.4329	0.0489845	-2.15378	0.0389546		b	c	bc
BnaCnng12240D	Zinc finger, Dof-type	-0.927131	0.188618	-1.50908	0.000181026	-1.54453	8.73841e-05		b	c	bc
BnaA03g24870D	C2 calcium-dependent membrane targeting;Phospholipase D/Transphosphatidylase;C2 calcium/lipid-binding domain, CaLB;Phospholipase D, plant;Phospholipase D family;C2 membrane targeting protein;Phospholipase D, C-terminal	-0.324714	0.854735	-1.29811	0.188974	-1.93946	0.0112135			c	c
BnaC02g33540D	Late embryogenesis abundant protein, LEA-14	-0.232273	0.931442	0.327344	0.58127	0.984654	0.00408001			c	c
BnaA08g24580D	no data	0.278998	0.830083	0.937723	0.0388692	1.03405	0.00876871		b	c	bc
BnaC04g47640D	Methyltransferase type 11	0.493022	0.878497	-2.53435	0.0132637	-0.67808	0.529103		b		b
BnaA01g32250D	Protein kinase, catalytic domain;Legume lectin domain;Serine/threonine- / dual specificity protein kinase, catalytic domain;Serine/threonine-protein kinase, active site;Concanavalin A-like lectin/glucanases superfamily;Protein kinase-like domain;Concanavalin A-like lectin/glucanase, subgroup;Protein kinase, ATP binding site;Tyrosine-protein kinase, catalytic domain	-0.725703	0.759372	-2.04039	8.45019e-05	-0.984735	0.0605584		b		b
BnaA03g11620D	Lipase, GDSL;Lipase, GDSL, active site;SGNH hydrolase-type esterase domain	-1.59882	0.0815172	-1.57488	0.00609689	-0.54978	0.387191		b		b
BnaA05g31940D	Heavy metal-associated domain, HMA	0.0321727	0.997677	0.875286	0.161219	1.07926	0.0400898			c	c
BnaCnng32090D	no data	0.172304	0.990601	1.13896	0.271607	1.32322	0.032799			c	c
BnaC04g23280D	no data	-0.9815	0.739393	-3.7188	0.00468395	-2.54233	0.0325871		b	c	bc
BnaA03g14760D	Protein kinase, catalytic domain;Serine/threonine- / dual specificity protein kinase, catalytic domain;Serine/threonine-protein kinase, active site;Protein kinase-like domain;Tyrosine-protein kinase, catalytic domain	-0.246782	0.953844	-3.15556	0.00105008	-1.48969	0.107578		b		b
BnaC04g29740D	Cytochrome b561, eukaryote;DOMON domain;Cytochrome b561/ferric reductase transmembrane;Uncharacterised conserved protein UCP037471	-1.0467	0.788036	-2.42131	0.00821181	-1.18876	0.183121		b		b
BnaAnng37560D	Inorganic pyrophosphatase	-0.645744	0.0316006	-0.338316	0.482241	-0.276999	0.503162	a			a
BnaCnng35500D	Selenium-binding protein;WD40/YVTN repeat-like-containing domain	0.75499	0.345349	1.52392	0.0456322	2.7533	5.36899e-05		b	c	bc
BnaA05g01050D	SANT/Myb domain;Myb domain, plants;Homeodomain-like;Myb domain	-0.266334	0.761247	-0.930175	0.0134719	0.148751	0.762644		b		b
BnaA05g07450D	UDP-glucuronosyl/UDP-glucosyltransferase	-1.01726	0.191378	-3.27996	0.000187805	-2.669	0.000773742		b	c	bc
BnaA07g32970D	Calcium-binding EF-hand;EF-hand-like domain;EF-Hand 1, calcium-binding site	0.667001	0.906279	1.36019	0.217273	1.86916	0.0340155			c	c
BnaA03g31490D	Wound-induced protein, Wun1;Wound-induced protein, Wun1, subgroup	1.678	0.0592004	0.851282	0.0902375	1.11198	0.00711316			c	c
BnaC07g38590D	no data	-0.2207	0.93587	-0.627876	0.421021	-1.18906	0.0298881			c	c
BnaC03g73050D	C2 calcium-dependent membrane targeting;Phospholipase D/Transphosphatidylase;C2 calcium/lipid-binding domain, CaLB;Phospholipase D, plant;Phospholipase D family;C2 membrane targeting protein;Phospholipase D, C-terminal	-2.81368	0.263094	-3.7076	0.00222165	-4.56151	3.57193e-05		b	c	bc
BnaAnng30540D	Glycoside hydrolase, family 35;Galactose-binding domain-like;Glycoside hydrolase, catalytic domain;Glycoside hydrolase, superfamily	1.65288	0.313719	2.08723	0.00720545	0.287464	0.786747		b		b
BnaA06g27910D	Exostosin-like	0.153696	0.966111	-2.90757	0.00160602	-1.10954	0.244707		b		b
BnaA04g28420D	Senescence regulator	1.51994	0.00999668	0.462051	0.65154	-0.193778	0.816071	a			a
BnaA06g09010D	Zinc finger, RING-type;Zinc finger, RING/FYVE/PHD-type	2.75981	2.35016e-05	2.35312	2.39141e-09	2.22102	3.52993e-09	a	b	c	abc
BnaC04g54340D	Protein of unknown function DUF688	0.318131	0.915167	0.737015	0.211188	1.35714	0.00169857			c	c
BnaC07g26580D	Myc-type, basic helix-loop-helix (bHLH) domain	-0.886531	0.751555	-0.836672	0.508168	-1.73778	0.0409515			c	c
BnaAnng00100D	Protein kinase, catalytic domain;Serine/threonine- / dual specificity protein kinase, catalytic domain;NAF domain;Serine/threonine-protein kinase, active site;Protein kinase-like domain;Protein kinase, ATP binding site;NAF/FISL domain;Tyrosine-protein kinase, catalytic domain;Calcium/calmodulin-dependent/calcium-dependent protein kinase	0.453093	0.570912	0.356872	0.576147	0.972168	0.0145228			c	c
BnaC08g38820D	Protein kinase, catalytic domain;Legume lectin domain;Serine/threonine- / dual specificity protein kinase, catalytic domain;Serine/threonine-protein kinase, active site;Concanavalin A-like lectin/glucanases superfamily;Protein kinase-like domain;Concanavalin A-like lectin/glucanase, subgroup;Protein kinase, ATP binding site;Tyrosine-protein kinase, catalytic domain	0.149717	0.966387	-1.60411	0.00203891	-1.71357	0.000290885		b	c	bc
BnaA03g17720D	Polyketide cyclase/dehydrase;START-like domain	-2.2689	4.98236e-07	-2.43055	4.32811e-05	-1.48443	0.009448	a	b	c	abc
BnaC08g15370D	Proton-dependent oligopeptide transporter family;Major facilitator superfamily domain, general substrate transporter;PTR2 family proton/oligopeptide symporter, conserved site	-1.94751	3.88596e-08	-2.64012	5.07325e-13	-1.47278	2.86238e-05	a	b	c	abc
BnaC09g04000D	Serine-threonine/tyrosine-protein kinase catalytic domain	-2.80206	0.62206	-2.26781	0.01281	-1.80784	0.00344786		b	c	bc
BnaC04g43980D	no data	-0.00610319	1	-1.58734	0.0338104	-0.203982	0.826221		b		b
BnaA07g28710D	Peptidase M10, metallopeptidase;Peptidoglycan binding-like;Peptidase, metallopeptidase;Peptidase M10A, cysteine switch, zinc binding site;Peptidase M10A;Metallopeptidase, catalytic domain	-0.591796	0.926941	-4.4578	6.27493e-06	-3.98614	4.49727e-06		b	c	bc
BnaA04g06560D	Transferase;Chloramphenicol acetyltransferase-like domain	0.532947	0.595233	1.11355	0.0205269	2.36682	9.09672e-09		b	c	bc
BnaA09g25770D	Protein of unknown function DUF668;Protein of unknown function DUF3475	-0.607431	0.860622	-4.41501	0.000347404	-2.94344	0.00782092		b	c	bc
BnaA10g06290D	AAA+ ATPase domain;ATPase, AAA-type, core;ATPase, AAA-type, conserved site	-0.570324	0.456011	-2.27637	0.00174998	-2.37558	0.00140777		b	c	bc
BnaC05g43010D	no data	1.13978	0.613348	5.58872	8.1865e-07	5.53827	8.45424e-08		b	c	bc
BnaA05g10050D	Peptidase S10, serine carboxypeptidase;Peptidase S10, serine carboxypeptidase, active site	-0.605752	0.150539	-1.28279	0.00030701	-1.22911	0.000372705		b	c	bc
BnaA09g00550D	Zinc finger, RING-CH-type;Zinc finger, RING/FYVE/PHD-type;Protein of unknown function DUF3675	-1.31212	0.638557	-2.22965	0.0401195	-1.0545	0.307336		b		b
BnaC04g40710D	Tetratricopeptide-like helical;Tetratricopeptide repeat-containing domain;Tetratricopeptide repeat	-0.626727	0.700827	-0.0525588	0.963466	1.6347	6.85326e-05			c	c
BnaC07g14640D	O-methyltransferase, family 2;Winged helix-turn-helix transcription repressor DNA-binding domain;Plant methyltransferase dimerisation;Caffeate O-methyltransferase (COMT) family	-1.6813	0.668972	-4.60923	0.000311837	-4.02757	0.000406785		b	c	bc
BnaA04g27940D	Protein kinase, catalytic domain;Legume lectin domain;Serine/threonine- / dual specificity protein kinase, catalytic domain;Serine/threonine-protein kinase, active site;Concanavalin A-like lectin/glucanases superfamily;Protein kinase-like domain;Concanavalin A-like lectin/glucanase, subgroup;Tyrosine-protein kinase, catalytic domain	-0.758423	0.93587	-7.30498	3.23978e-05	-5.41104	0.000323404		b	c	bc
BnaA04g17210D	Protein kinase, catalytic domain;WD40 repeat;Serine/threonine- / dual specificity protein kinase, catalytic domain;Serine/threonine-protein kinase, active site;Protein kinase-like domain;WD40/YVTN repeat-like-containing domain;Protein kinase, ATP binding site;WD40-repeat-containing domain;G-protein beta WD-40 repeat;Tyrosine-protein kinase, catalytic domain	-0.299187	0.949674	0.526557	0.699184	1.57323	0.0413475			c	c
BnaC03g00160D	Ferritin;Ferritin/DPS protein domain;Ferritin- like diiron domain;Ferritin/ribonucleotide reductase-like;Ferritin-related;Ferritin, conserved site	-1.01362	0.45003	-2.50047	6.2104e-05	-3.17804	3.66582e-08		b	c	bc
BnaC07g12460D	Zinc finger, RING-type;Zinc finger, RING/FYVE/PHD-type	1.85649	0.000317445	2.31192	2.74813e-05	2.15775	3.45555e-05	a	b	c	abc
BnaC04g00060D	Glutaredoxin;Glutaredoxin-like, plant II;Thioredoxin-like fold	-0.79431	0.60898	-0.559504	0.64625	-1.46124	0.0366245			c	c
BnaA09g28080D	no data	-0.179201	0.961451	-1.30921	0.0400041	-0.774009	0.209159		b		b
BnaA07g10300D	No apical meristem (NAM) protein	-0.0576499	0.98885	0.200681	0.844419	-0.96828	0.0382551			c	c
BnaA06g13820D	UVR domain;Bifunctional nuclease domain	1.27962	1.49127e-05	1.26725	0.0182595	1.12379	0.0289177	a	b	c	abc
BnaC06g31300D	Peptidase M10, metallopeptidase;Peptidoglycan binding-like;Peptidase, metallopeptidase;Peptidase M10A, cysteine switch, zinc binding site;Peptidase M10A;Metallopeptidase, catalytic domain	-0.00973013	1	-2.12131	0.0351172	-2.30753	0.00617607		b	c	bc
BnaA04g22430D	Protein kinase, catalytic domain;Serine-threonine/tyrosine-protein kinase catalytic domain;Serine/threonine- / dual specificity protein kinase, catalytic domain;Protein kinase-like domain;Concanavalin A-like lectin/glucanase, subgroup;Tyrosine-protein kinase, catalytic domain	-0.229977	0.90225	-1.82278	0.0104382	-1.04012	0.14446		b		b
BnaC08g43470D	Lateral organ boundaries, LOB	0.812907	0.924377	-3.93834	0.00853234	-2.64011	0.0480666		b	c	bc
BnaA07g28460D	Glutathione S-transferase, N-terminal;Glutathione S-transferase, C-terminal;Glutathione S-transferase, C-terminal-like;Thioredoxin-like fold;Glutathione S-transferase/chloride channel, C-terminal	-2.25496	0.193882	-5.03647	0.000370171	-3.08993	0.0089294		b	c	bc
BnaA04g18590D	Protein kinase, catalytic domain;Serine/threonine- / dual specificity protein kinase, catalytic domain;Serine/threonine-protein kinase, active site;Protein kinase-like domain;Tyrosine-protein kinase, catalytic domain	0.0496412	0.997677	-1.8512	0.00357156	-0.390557	0.604741		b		b
BnaA01g19460D	Six-bladed beta-propeller, TolB-like;Strictosidine synthase, conserved region	-0.86473	0.272836	-1.75306	0.00259659	-0.690831	0.277666		b		b
BnaA07g18730D	Zinc finger, GATA-type;Zinc finger, NHR/GATA-type;Transcription factor, GATA, plant	0.460202	0.824869	1.03364	0.109575	1.36156	0.0125269			c	c
BnaA02g20020D	Tetratricopeptide-like helical	-0.0066397	1	1.44852	0.0476977	2.08382	0.000786814		b	c	bc
BnaAnng14290D	Cytochrome P450;Cytochrome P450, E-class, group I;Cytochrome P450, conserved site	0.749365	0.686876	1.47913	0.0255547	2.62659	4.40443e-06		b	c	bc
BnaA07g38960D	Protein kinase, catalytic domain;Serine-threonine/tyrosine-protein kinase catalytic domain;Serine/threonine- / dual specificity protein kinase, catalytic domain;Serine/threonine-protein kinase, active site;Protein kinase-like domain;Tyrosine-protein kinase, catalytic domain	-0.265267	0.933504	-1.46225	0.0204144	-0.524808	0.437688		b		b
BnaC09g15060D	DnaJ domain;Chaperone DnaJ, C-terminal;HSP40/DnaJ peptide-binding;DnaJ domain, conserved site	0.411769	0.887216	0.950556	0.239945	1.43942	0.0225599			c	c
BnaA03g32640D	ABC transporter, transmembrane domain;ABC transporter-like;AAA+ ATPase domain;ABC transporter, transmembrane domain, type 1;ABC transporter, integral membrane type 1	-0.631326	0.889048	-7.07225	0.000311837	-6.60532	8.27179e-05		b	c	bc
BnaC09g09210D	No apical meristem (NAM) protein	-0.179811	0.965761	-2.56731	0.00370846	-1.78085	0.0295243		b	c	bc
BnaA01g09200D	no data	1.34368	0.361815	0.282236	0.735125	0.928494	0.0433603			c	c
BnaC05g02020D	Protein kinase, catalytic domain;Serine/threonine- / dual specificity protein kinase, catalytic domain;Serine/threonine-protein kinase, active site;Protein kinase-like domain;Protein kinase, ATP binding site;Tyrosine-protein kinase, catalytic domain	-0.00269497	1	-0.989598	0.122401	-1.26704	0.0187911			c	c
BnaC09g25380D	Heavy metal-associated domain, HMA	-0.73006	0.727292	1.60031	0.0342705	2.40052	3.70184e-05		b	c	bc
BnaC07g01340D	no data	0.253644	0.962918	0.36712	0.742941	1.18172	0.0347817			c	c
BnaC06g22480D	Homeodomain, ZF-HD class;ZF-HD homeobox protein, Cys/His-rich dimerisation domain;Homeodomain-like	0.836971	0.580507	-0.375991	0.888755	-3.68301	0.0304968			c	c
BnaC07g42780D	Peptidase S10, serine carboxypeptidase;Peptidase S10, serine carboxypeptidase, active site	-0.199166	0.828516	-0.788489	0.0440452	0.268856	0.549522		b		b
BnaC07g38370D	Tetratricopeptide TPR-1;CS-like domain;SGS;HSP20-like chaperone;Tetratricopeptide-like helical;Tetratricopeptide repeat-containing domain;CS domain;Tetratricopeptide repeat	0.531769	0.634303	0.0605867	0.967401	1.29601	0.0262797			c	c
BnaA09g31130D	no data	-1.00812	0.613513	-0.779828	0.346477	1.31589	0.0244727			c	c
BnaC03g44170D	Protein kinase, catalytic domain;Serine-threonine/tyrosine-protein kinase catalytic domain;Serine/threonine- / dual specificity protein kinase, catalytic domain;Gnk2-homologous domain;Serine/threonine-protein kinase, active site;Protein kinase-like domain;Concanavalin A-like lectin/glucanase, subgroup;Protein kinase, ATP binding site;Tyrosine-protein kinase, catalytic domain	-3.27801	0.469709	-4.28114	0.00124383	-4.26455	0.000224489		b	c	bc
BnaA06g18100D	Alpha crystallin/Hsp20 domain;HSP20-like chaperone	1.10311	0.205038	4.4286	8.8244e-07	4.11638	7.84273e-07		b	c	bc
BnaA02g27870D	Cytochrome P450;Cytochrome P450, E-class, group I;Cytochrome P450, conserved site	-0.865839	0.686158	-4.14268	0.000571438	-3.38386	0.00183175		b	c	bc
BnaA03g28400D	Methionine synthase, vitamin-B12 independent;Cobalamin-independent methionine synthase;Cobalamin (vitamin B12)-independent methionine synthase MetE, N-terminal	-0.0647876	0.971951	-0.7934	0.0374381	-0.366424	0.37292		b		b
BnaA09g31610D	AAA+ ATPase domain;ATPase, AAA-type, core;ATPase, AAA-type, conserved site;AAA-type ATPase, N-terminal domain	-0.650261	0.864878	-2.49289	0.00172428	-0.76546	0.36454		b		b
BnaC02g27050D	Mlo-related protein	-3.332	0.0403224	-0.546738	0.284573	-0.282698	0.538803	a			a
BnaA02g10710D	no data	-1.10199	0.785514	-2.94314	0.0169132	-1.87059	0.0797701		b		b
BnaA10g22600D	No apical meristem (NAM) protein	-0.822025	0.443106	-0.734591	0.0351733	0.0071094	0.98836		b		b
BnaC03g17800D	Protein kinase, catalytic domain;Serine/threonine- / dual specificity protein kinase, catalytic domain;Serine/threonine-protein kinase, active site;Protein kinase-like domain;Tyrosine-protein kinase, catalytic domain	-0.223171	0.966732	-2.94424	0.000917922	-0.971268	0.289034		b		b
BnaC04g33710D	no data	0.289068	0.821422	1.58848	0.0733251	3.53053	2.07833e-06			c	c
BnaC05g27870D	Uncharacterised protein family UPF0503	1.09068	0.543741	0.465072	0.591868	1.276	0.0175119			c	c
BnaA07g26110D	Protein kinase, catalytic domain;Serine/threonine- / dual specificity protein kinase, catalytic domain;Serine/threonine-protein kinase, active site;Protein kinase-like domain;Concanavalin A-like lectin/glucanase, subgroup;Protein kinase, ATP binding site;Tyrosine-protein kinase, catalytic domain	-0.862035	0.904421	-4.73551	0.000905285	-1.25175	0.373107		b		b
BnaA01g15110D	ENTH/VHS;AP180 N-terminal homology (ANTH) domain;Epsin-like, N-terminal;Clathrin adaptor, phosphoinositide-binding, GAT-like	-0.541628	0.954967	-3.91099	0.00267744	-4.20587	0.000657389		b	c	bc
BnaA09g45400D	NUDIX hydrolase domain;NUDIX hydrolase domain-like;NUDIX hydrolase, conserved site	0.0328023	0.999466	1.22352	0.065834	1.98157	0.000479893			c	c
BnaC06g23900D	Toll/interleukin-1 receptor homology (TIR) domain	-0.121853	1	-2.46025	0.0261794	-1.30612	0.15195		b		b
BnaC06g40020D	Protein kinase, catalytic domain;Serine/threonine- / dual specificity protein kinase, catalytic domain;Serine/threonine-protein kinase, active site;Protein kinase-like domain;Concanavalin A-like lectin/glucanase, subgroup;Wall-associated kinase;EGF-like calcium-binding, conserved site;Tyrosine-protein kinase, catalytic domain;Wall-associated receptor kinase galacturonan-binding domain	0.0802175	0.993081	-3.0268	0.00479504	-0.964529	0.389905		b		b
BnaA10g01090D	Phospholipid/glycerol acyltransferase	0.105669	0.972227	-0.119644	0.920548	1.10712	0.0335145			c	c
BnaC07g50440D	no data	2.07159	0.470931	-1.19122	0.0364362	0.216629	0.718552		b		b
BnaA10g03460D	Zinc/iron permease;Zinc/iron permease, fungal/plant	0.0236471	1	-2.17784	0.00372042	-1.82771	0.0103252		b	c	bc
BnaCnng63310D	Glycosyl transferase, family 8	1.86211	0.00886212	1.29926	0.0922243	3.10145	5.88886e-07	a		c	ac
BnaC08g40500D	Cation-transporting P-type ATPase;Phospholipid-transporting P-type ATPase, subfamily IV;P-type ATPase, A domain;P-type ATPase, phosphorylation site;HAD-like domain;P-type ATPase, cytoplasmic domain N	0.0680032	0.989232	-3.53737	0.00137383	-2.27645	0.0256782		b	c	bc
BnaC05g11110D	Tetratricopeptide-like helical	1.2377	0.215706	2.04127	0.00350246	2.23564	0.00034343		b	c	bc
BnaC02g31270D	Protein kinase, catalytic domain;Leucine-rich repeat;Serine/threonine- / dual specificity protein kinase, catalytic domain;Leucine-rich repeat, typical subtype;Serine/threonine-protein kinase, active site;Protein kinase-like domain;Leucine-rich repeat-containing N-terminal, type 2;Concanavalin A-like lectin/glucanase, subgroup;Protein kinase, ATP binding site;Tyrosine-protein kinase, catalytic do…	-1.71642	0.38698	-6.65784	0.000183862	-5.68698	0.000238814		b	c	bc
BnaA10g15560D	Protein of unknown function DUF538	-0.114768	0.98299	-3.15019	0.00180476	-3.09295	0.000649362		b	c	bc
BnaCnng49210D	Senescence regulator	1.37355	0.0134071	1.45151	0.0353332	1.57843	0.0114662	a	b	c	abc
BnaA05g35550D	FAD linked oxidase, N-terminal;Berberine/berberine-like;FAD-binding, type 2;FAD-binding, type 2, subdomain 1;CO dehydrogenase flavoprotein-like, FAD-binding, subdomain 2	-2.84194	0.631498	-4.39305	0.00210865	-1.77795	0.128737		b		b
BnaC03g48430D	Cytochrome P450;Cytochrome P450, E-class, group I;Cytochrome P450, conserved site	0.823852	0.0407	0.928096	0.0343298	0.890549	0.0303883	a	b	c	abc
BnaA10g23900D	Peptide methionine sulphoxide reductase MsrA	1.84315	0.00886212	-0.0904492	0.987424	1.84172	0.495017	a			a
BnaC07g06580D	Peptide methionine sulphoxide reductase MrsB	0.10905	0.983431	-1.55381	0.052354	-1.63147	0.0182174			c	c
BnaA09g45370D	Uncharacterised protein family Cys-rich	-0.442824	0.910824	-3.18289	0.0303543	-1.0446	0.450065		b		b
BnaA01g15640D	Fructose-bisphosphate aldolase, class-I;Aldolase-type TIM barrel	0.542427	0.531221	1.56513	0.0230419	1.87159	0.0029234		b	c	bc
BnaCnng76260D	Late embryogenesis abundant protein, LEA-14	-1.41634	0.612678	-3.37361	0.00089622	-2.41583	0.00452973		b	c	bc
BnaCnng24210D	Glycosyltransferase, DXD sugar-binding motif;Alpha 1,4-glycosyltransferase domain	0.800023	0.861758	-4.49445	6.12757e-06	-3.31126	0.000187703		b	c	bc
BnaAnng04540D	Protein kinase, catalytic domain;Serine-threonine/tyrosine-protein kinase catalytic domain;Leucine-rich repeat;Serine/threonine- / dual specificity protein kinase, catalytic domain;Tyrosine-protein kinase, active site;Protein kinase-like domain;Concanavalin A-like lectin/glucanase, subgroup;Protein kinase, ATP binding site;Tyrosine-protein kinase, catalytic domain	-0.796378	0.325601	-4.22174	0.00023106	-3.60248	0.000456457		b	c	bc
BnaC08g17850D	Calcium-binding EF-hand;EF-hand-like domain;EF-Hand 1, calcium-binding site	0.182505	0.962595	0.959872	0.232801	1.69704	0.00603367			c	c
BnaC05g01110D	Myc-type, basic helix-loop-helix (bHLH) domain	0.921723	0.180132	0.17439	0.885017	1.30573	0.0171547			c	c
BnaA05g06750D	Plant lipid transfer protein/Par allergen;Bifunctional inhibitor/plant lipid transfer protein/seed storage helical domain	1.11493	0.0976938	3.89036	0.0016049	6.8289	3.50222e-09		b	c	bc
BnaA09g29730D	Actin-binding FH2/DRF autoregulatory;Concanavalin A-like lectin/glucanase, subgroup;Actin-binding FH2	-1.00706	0.752559	-2.84369	0.00459958	-1.7064	0.0603779		b		b
BnaA07g04240D	UDP-glucuronosyl/UDP-glucosyltransferase	-0.841823	0.745899	-2.95053	0.000673457	-2.48767	0.00186126		b	c	bc
BnaC05g49110D	Zinc/iron permease;Zinc/iron permease, fungal/plant	-0.291628	0.905544	-3.01607	0.000960788	-2.68773	0.00132846		b	c	bc
BnaA09g10770D	F-box domain, cyclin-like;Phloem protein 2-like	-0.67193	0.707099	-1.12762	0.0135904	-0.127238	0.825607		b		b
BnaA03g35980D	CCAAT-binding transcription factor, subunit B;CCAAT-binding factor, conserved site	0.0639495	0.986008	0.846125	0.0682174	0.971692	0.00933435			c	c
BnaC03g01730D	SANT/Myb domain;Myb domain, plants;Homeodomain-like;Myb domain	0.715275	0.714415	-0.058917	0.963466	1.10259	0.0286299			c	c
BnaC03g26340D	Short-chain dehydrogenase/reductase SDR;Glucose/ribitol dehydrogenase;NAD(P)-binding domain	0.105295	0.941436	0.347526	0.594369	1.06676	0.00747752			c	c
BnaA07g34930D	Aldehyde dehydrogenase domain;Aldehyde dehydrogenase, conserved site;Aldehyde/histidinol dehydrogenase;Aldehyde dehydrogenase, N-terminal;Aldehyde dehydrogenase, C-terminal	1.15901	1.40914e-05	1.8369	2.2061e-06	2.16118	1.13845e-09	a	b	c	abc
BnaC03g13250D	Glycoside hydrolase, family 35;Galactose-binding domain-like;Glycoside hydrolase, catalytic domain;Glycoside hydrolase, superfamily;Glycoside hydrolase, family 35, conserved site	1.77925	0.165332	1.66743	0.0167325	0.220045	0.825307		b		b
BnaA07g04890D	Protein kinase, catalytic domain;AGC-kinase, C-terminal;Serine/threonine- / dual specificity protein kinase, catalytic domain;Serine/threonine-protein kinase, active site;Protein kinase-like domain;Tyrosine-protein kinase, catalytic domain	0.0927039	0.993428	-2.65741	0.00388947	-0.124797	0.920436		b		b
BnaC02g42720D	No apical meristem (NAM) protein	0.488583	0.772398	-1.94723	0.0187785	-0.456002	0.637285		b		b
BnaC08g42050D	Thioredoxin;Thioredoxin-like fold;Thioredoxin domain	0.870618	0.72475	3.04305	0.000980283	1.09039	0.253266		b		b
BnaA10g13110D	Protein kinase, catalytic domain;Legume lectin domain;Serine/threonine- / dual specificity protein kinase, catalytic domain;Serine/threonine-protein kinase, active site;Concanavalin A-like lectin/glucanases superfamily;Protein kinase-like domain;Concanavalin A-like lectin/glucanase, subgroup;Protein kinase, ATP binding site;Tyrosine-protein kinase, catalytic domain	-0.861866	0.899763	-5.67661	0.000659548	-2.58138	0.0683625		b		b
BnaA02g27630D	AP2/ERF domain;B3 DNA binding domain;DNA-binding pseudobarrel domain;DNA-binding, integrase-type	-2.4174	0.183847	-2.79459	0.0222827	-3.99015	0.000158229		b	c	bc
BnaA05g34850D	DNA-binding WRKY	-0.382804	0.970334	-2.62457	0.0269366	0.690274	0.565981		b		b
BnaCnng07930D	Polyketide cyclase SnoaL-like domain	-1.18881	0.0183384	-7.03977	1.24526e-06	-5.35719	0.000238814	a	b	c	abc
BnaC07g31250D	Sugar/inositol transporter;General substrate transporter;Sugar transporter, conserved site;Major facilitator superfamily domain, general substrate transporter;Major facilitator superfamily domain	-0.470039	0.908159	-3.85484	0.00208713	-4.48977	0.000108023		b	c	bc
BnaC06g40840D	WD40 repeat;WD40/YVTN repeat-like-containing domain;WD40-repeat-containing domain;WD40 repeat, conserved site;G-protein beta WD-40 repeat	-0.359497	0.522791	-0.508137	0.424956	-1.77957	0.000116458			c	c
BnaC06g09680D	t-SNARE	-0.558281	0.237553	0.384801	0.668937	1.77956	0.000364121			c	c
BnaA10g00380D	Cytochrome P450;Cytochrome P450, E-class, group I;Cytochrome P450, conserved site	-0.186646	0.952545	0.142326	0.899795	1.29104	0.00893057			c	c
BnaA02g33940D	Regulator of chromosome condensation, RCC1;Regulator of chromosome condensation 1/beta-lactamase-inhibitor protein II	1.24368	0.000544148	2.12639	1.36167e-09	1.53787	3.93828e-06	a	b	c	abc
BnaA09g30080D	no data	-0.227724	0.971441	1.31781	0.153995	2.6204	4.3468e-06			c	c
BnaA03g22630D	Glycoside hydrolase, family 17;Glycoside hydrolase, catalytic domain;Glycoside hydrolase, superfamily	-0.0473991	0.979221	0.0287921	0.970591	0.763663	0.0109634			c	c
BnaA06g25130D	no data	-1.82788	0.467803	-5.52168	2.86374e-05	-4.3688	0.000175785		b	c	bc
BnaC03g18450D	Leucine-rich repeat;Leucine-rich repeat, typical subtype	-0.993571	0.871797	-4.69948	0.000621093	-2.49313	0.0285174		b	c	bc
BnaA03g34610D	Basic-leucine zipper domain	-0.865937	0.0430082	-1.20575	0.000475267	-1.09926	0.00086839	a	b	c	abc
BnaA07g03070D	Protein kinase, catalytic domain;Serine/threonine- / dual specificity protein kinase, catalytic domain;Serine/threonine-protein kinase, active site;Protein kinase-like domain;Concanavalin A-like lectin/glucanase, subgroup;Protein kinase, ATP binding site;Tyrosine-protein kinase, catalytic domain	-0.83261	0.388155	-1.69257	0.0122802	-0.781741	0.258925		b		b
BnaA03g46010D	Protein BYPASS-related	-1.28807	0.672425	-2.18598	0.0156036	-1.24184	0.11707		b		b
BnaA05g23700D	no data	0.739694	0.0545729	1.34372	0.00189103	0.988305	0.0218242		b	c	bc
BnaC01g28220D	no data	-0.159176	1	-4.2671	0.00637631	-1.94261	0.156643		b		b
BnaC07g36580D	Amino acid/polyamine transporter I;Cationic amino acid transporter	-1.06725	0.384705	-5.88459	2.24166e-06	-5.9039	1.67917e-07		b	c	bc
BnaA10g20120D	SWEET sugar transporter	-0.359084	0.960552	4.00866	0.0102989	6.55368	1.93753e-06		b	c	bc
BnaC06g01160D	Serpin family;Protease inhibitor I4, serpin, plant;Protease inhibitor I4, serpin, conserved site;Serpin domain	-0.0969518	0.982501	0.513293	0.335514	1.11475	0.00326384			c	c
BnaA01g12930D	Protein kinase, catalytic domain;Serine/threonine- / dual specificity protein kinase, catalytic domain;Gnk2-homologous domain;Serine/threonine-protein kinase, active site;Protein kinase-like domain;Concanavalin A-like lectin/glucanase, subgroup;Protein kinase, ATP binding site;Tyrosine-protein kinase, catalytic domain	-1.04957	0.562813	-1.36383	0.0194845	-0.189092	0.801528		b		b
BnaA02g12360D	U box domain;Armadillo-like helical;Zinc finger, RING/FYVE/PHD-type;Armadillo-type fold	0.359498	0.954792	-2.11283	0.104716	-2.30738	0.0218242			c	c
BnaA02g06880D	Exocyst complex protein Exo70;Cullin repeat-like-containing domain	0.188905	0.972227	-1.74485	0.00907682	-1.29114	0.0409515		b	c	bc
BnaC03g56990D	Major facilitator superfamily;Major facilitator superfamily domain, general substrate transporter	-1.14623	0.521371	-6.06863	2.22698e-05	-5.4289	9.94033e-06		b	c	bc
BnaC04g35420D	Phytosulfokine	-1.19006	0.672875	-1.84137	0.0156305	-0.59009	0.458923		b		b
BnaC07g18650D	Ribosomal protein L5;Ribosomal protein L5, conserved site;Ribosomal protein L5 domain	-0.456806	0.380956	-0.423698	0.590727	-1.24319	0.0117097			c	c
BnaCnng62050D	Ammonium transporter;Blood group Rhesus C/E/D polypeptide;Ammonium transporter, conserved site;Ammonium transporter AmtB-like domain	-0.0474929	0.992696	-1.70888	0.0256803	-1.26669	0.0824254		b		b
BnaA09g05170D	WD40 repeat;WD40/YVTN repeat-like-containing domain;WD40-repeat-containing domain	-0.829254	0.0479308	-1.33165	0.00895	-0.588968	0.272149	a	b		ab
BnaC01g24480D	Protein kinase, catalytic domain;Serine-threonine/tyrosine-protein kinase catalytic domain;Serine/threonine- / dual specificity protein kinase, catalytic domain;Serine/threonine-protein kinase, active site;Protein kinase-like domain;Concanavalin A-like lectin/glucanase, subgroup;Protein kinase, ATP binding site;Tyrosine-protein kinase, catalytic domain;Malectin-like carbohydrate-binding domain	-0.0780796	0.980604	0.245224	0.849222	1.29878	0.0385416			c	c
BnaCnng18280D	Heavy metal-associated domain, HMA	-2.69632	0.649776	-3.12352	0.0359667	-1.18445	0.391243		b		b
BnaC07g46480D	Cytochrome P450;Cytochrome P450, E-class, group I;Cytochrome P450, conserved site	0.330573	0.846955	-4.18016	0.000704031	-2.41503	0.0347187		b	c	bc
BnaC09g05590D	Pectinesterase inhibitor	-0.365071	0.967455	2.52291	0.0143066	2.95314	0.000391082		b	c	bc
BnaA07g28470D	Glutathione S-transferase, N-terminal;Glutathione S-transferase, C-terminal;Glutathione S-transferase, C-terminal-like;Thioredoxin-like fold;Glutathione S-transferase/chloride channel, C-terminal	-2.61823	0.296843	-3.93404	2.53224e-05	-2.00252	0.0213696		b	c	bc
BnaA09g38160D	no data	-3.20708	0.491316	-2.87249	0.00413501	-3.30904	5.71837e-05		b	c	bc
BnaC05g27560D	Protein kinase, catalytic domain;Leucine-rich repeat;Serine/threonine- / dual specificity protein kinase, catalytic domain;Leucine-rich repeat, typical subtype;Tyrosine-protein kinase, active site;Protein kinase-like domain;Concanavalin A-like lectin/glucanase, subgroup;Protein kinase, ATP binding site;Tyrosine-protein kinase, catalytic domain	-1.3548	0.00459	-5.25467	4.74125e-05	-4.52598	0.000107471	a	b	c	abc
BnaC02g27240D	Dormancyauxin associated	0.824883	0.0535614	1.10954	0.0445568	1.02847	0.042953		b	c	bc
BnaCnng02970D	Senescence regulator	1.15539	0.0581206	1.14798	0.112302	1.64734	0.00606696			c	c
BnaC03g69970D	Disease resistance protein;NB-ARC;AAA+ ATPase domain	-0.543491	0.78482	-2.89425	0.00104195	-2.39155	0.00438803		b	c	bc
BnaA08g13340D	Type I phosphodiesterase/nucleotide pyrophosphatase/phosphate transferase;Alkaline phosphatase-like, alpha/beta/alpha;Alkaline-phosphatase-like, core domain;Ectonucleotide pyrophosphatase/phosphodiesterase family	-0.403512	0.685871	1.5756	0.277701	2.81663	0.00909556			c	c
BnaA06g21470D	Heat shock factor (HSF)-type, DNA-binding;Winged helix-turn-helix transcription repressor DNA-binding domain	1.93093	0.0529679	2.05169	0.000955453	2.2627	9.30661e-05		b	c	bc
BnaC02g44590D	Chlorophyll A-B binding protein, plant;Chlorophyll A-B binding protein;Chlorophyll a/b binding protein domain	0.121762	0.927801	-1.6656	8.05287e-06	-2.14299	8.53046e-10		b	c	bc
BnaA04g04900D	Lipase, GDSL;SGNH hydrolase-type esterase domain	0.119763	0.932953	0.439624	0.380487	1.01878	0.00447266			c	c
BnaC04g16720D	C1-like	-0.889172	0.784262	-3.9252	0.000341246	-2.69579	0.00530159		b	c	bc
BnaCnng64010D	ABC transporter-like;AAA+ ATPase domain;ABC-2 type transporter;Plant PDR ABC transporter associated	-0.187336	0.975704	-2.21461	0.0427709	-1.73644	0.0636075		b		b
BnaC01g14890D	Protein kinase, catalytic domain;Serine-threonine/tyrosine-protein kinase catalytic domain;Serine/threonine- / dual specificity protein kinase, catalytic domain;Gnk2-homologous domain;Serine/threonine-protein kinase, active site;Protein kinase-like domain;Concanavalin A-like lectin/glucanase, subgroup;Protein kinase, ATP binding site;Tyrosine-protein kinase, catalytic domain	-0.542761	0.733407	-4.22449	0.000980478	-3.56224	0.00132745		b	c	bc
BnaC01g34080D	no data	-0.0223274	1	-1.95732	0.0342524	0.206021	0.855638		b		b
BnaA01g08380D	Protein kinase, catalytic domain;Serine/threonine- / dual specificity protein kinase, catalytic domain;Serine/threonine-protein kinase, active site;Protein kinase-like domain;Protein kinase, ATP binding site;Tyrosine-protein kinase, catalytic domain	0.539648	0.869931	-5.09963	6.90938e-05	-2.39332	0.0431918		b	c	bc
BnaC01g37160D	DnaJ domain	1.0924	0.00479441	1.88396	0.00067913	3.55261	6.43667e-12	a	b	c	abc
BnaA09g42080D	Protein kinase, catalytic domain;Serine-threonine/tyrosine-protein kinase catalytic domain;Serine/threonine- / dual specificity protein kinase, catalytic domain;Serine/threonine-protein kinase, active site;Protein kinase-like domain;Concanavalin A-like lectin/glucanase, subgroup;Protein kinase, ATP binding site;Tyrosine-protein kinase, catalytic domain;Malectin-like carbohydrate-binding domain	-0.0282484	0.994476	-1.43387	0.00696373	-1.18436	0.0204985		b	c	bc
BnaAnng24890D	Heavy metal-associated domain, HMA	-0.357273	0.908159	-0.240093	0.881307	-2.53997	0.00017779			c	c
BnaA07g38570D	no data	0.381427	0.957706	-2.23309	0.0184018	0.15748	0.89978		b		b
BnaA03g18100D	no data	-1.64718	0.779041	-3.79984	0.000562996	-1.4826	0.128665		b		b
BnaA02g13300D	Thionin	-0.464716	0.696953	0.416084	0.753058	2.04898	0.00244662			c	c
BnaC03g18820D	Dormancyauxin associated	1.2173	0.247642	1.72775	0.000208296	0.446943	0.41919		b		b
BnaC09g28720D	no data	0.829756	0.638243	-1.73473	0.0203601	-1.0079	0.162627		b		b
BnaA04g26460D	Remorin, C-terminal;Remorin, N-terminal	-0.500964	0.835153	0.55568	0.298605	1.0614	0.00627552			c	c
BnaC04g32770D	no data	-0.719292	0.730954	0.651162	0.358402	1.2363	0.0146169			c	c
BnaA09g30300D	Galactose-binding domain-like;Sad1/UNC-like, C-terminal	-0.431894	0.901047	0.585222	0.498973	1.43098	0.0127309			c	c
BnaA04g10500D	no data	-0.170756	0.97414	0.991882	0.277974	1.54746	0.0282642			c	c
BnaC06g22310D	Zinc finger, B-box	-0.419969	0.884923	1.31026	0.00419898	0.826664	0.0493333		b	c	bc
BnaC08g31760D	Cytochrome P450;Cytochrome P450, E-class, group I;Cytochrome P450, conserved site	-1.13932	0.557884	0.515221	0.686468	1.53376	0.0285483			c	c
BnaAnng25580D	Protein kinase, catalytic domain;Serine-threonine/tyrosine-protein kinase catalytic domain;Serine/threonine- / dual specificity protein kinase, catalytic domain;Gnk2-homologous domain;Serine/threonine-protein kinase, active site;Protein kinase-like domain;Concanavalin A-like lectin/glucanase, subgroup;Protein kinase, ATP binding site;Tyrosine-protein kinase, catalytic domain	-1.44594	0.376891	-3.84233	0.00123468	-3.61229	0.000876876		b	c	bc
BnaC06g34300D	Cytochrome P450;Cytochrome P450, E-class, group IV;Cytochrome P450, conserved site	-3.11241	0.209402	0.344181	0.863699	2.97026	2.51525e-05			c	c
BnaCnng74000D	Phospholipase-like, arabidopsis	0.219761	0.93066	-1.20788	0.082757	-2.19908	0.00010694			c	c
BnaA02g21850D	DNA-binding WRKY	-0.551748	0.949243	-2.87153	0.0089899	-1.42376	0.15109		b		b
BnaC08g10180D	Domain of unknown function DUF221	-0.373048	0.383876	-0.783079	0.0267607	-0.824774	0.0109596		b	c	bc
BnaC08g49160D	Myc-type, basic helix-loop-helix (bHLH) domain	-0.377189	0.925142	0.760318	0.527842	1.64968	0.0388239			c	c
BnaC09g06350D	Cysteine alpha-hairpin motif superfamily;CHCH	0.0829441	0.957381	0.742325	0.0187144	0.561316	0.0700713		b		b
BnaC07g35430D	no data	-0.217341	0.995809	-2.37526	0.030194	-1.54098	0.0854051		b		b
BnaC04g52400D	no data	1.379	0.759906	-4.33909	0.00262553	-1.65567	0.200704		b		b
BnaC05g15250D	UVR domain;Bifunctional nuclease domain	1.35506	4.49649e-06	1.29899	0.0136651	1.33052	0.00716756	a	b	c	abc
BnaC03g33180D	Armadillo-like helical;Armadillo-type fold	-0.413539	0.975387	-3.25255	0.00920103	-1.90783	0.0736804		b		b
BnaA07g19360D	no data	-0.0273054	0.997365	-0.199719	0.730564	0.671394	0.0321485			c	c
BnaA04g11150D	Toll/interleukin-1 receptor homology (TIR) domain;Disease resistance protein;NB-ARC;AAA+ ATPase domain;Leucine-rich repeat 3	-0.377979	0.905409	-0.889045	0.0418055	-0.22888	0.64138		b		b
BnaA10g21850D	Multi antimicrobial extrusion protein	-1.07834	0.00241994	-0.307915	0.865727	1.53488	0.0726535	a			a
BnaAnng17910D	Late embryogenesis abundant protein, LEA-14;Immunoglobulin-like fold;Water stress and hypersensitive response domain	-1.65281	0.49195	-0.229564	0.764275	1.94101	6.41977e-08			c	c
BnaC09g22880D	Chaperonin-like RbcX	0.496111	0.297228	0.866307	0.00875433	1.0094	0.000850267		b	c	bc
BnaA06g10730D	Heat shock protein 70 family;Heat shock protein 70, conserved site	0.434897	0.734695	3.04136	4.90003e-15	3.01328	1.44932e-16		b	c	bc
BnaA02g20750D	Dormancyauxin associated	1.37504	0.0513841	2.43777	2.99307e-05	2.69767	4.40769e-07		b	c	bc
BnaAnng07940D	no data	0.401849	0.765066	1.70554	0.00157628	2.21053	7.04733e-06		b	c	bc
BnaC02g38780D	Tetratricopeptide TPR-1;Tetratricopeptide-like helical;Tetratricopeptide repeat-containing domain;Tetratricopeptide repeat	0.205975	0.943825	-0.0579107	0.961985	1.76101	0.000171394			c	c
BnaC05g41370D	U box domain;Armadillo-like helical;Zinc finger, RING/FYVE/PHD-type;Armadillo-type fold	-0.215909	0.918968	-2.21815	0.0127665	-2.19789	0.0082301		b	c	bc
BnaA06g39280D	no data	-0.340738	0.915333	-0.605304	0.588787	-3.11694	2.56137e-06			c	c
BnaC05g20350D	Ureide permease	-2.19328	1.45778e-08	-3.61576	3.39928e-11	-2.61622	6.66989e-08	a	b	c	abc
BnaA01g11770D	Senescence regulator	2.00209	0.0515029	2.23932	0.0117358	3.61018	4.02587e-06		b	c	bc
BnaA05g07370D	Aromatic amino acid lyase;L-Aspartase-like;Phenylalanine ammonia-lyase, shielding domain;Fumarase/histidase, N-terminal	0.808795	0.00907611	-0.420518	0.490032	-0.00747701	0.990886	a			a
BnaA07g09050D	no data	-0.339748	0.730491	0.909305	0.311817	2.47652	8.88053e-05			c	c
BnaA06g36790D	Protein kinase, catalytic domain;Serine-threonine/tyrosine-protein kinase catalytic domain;Leucine-rich repeat;Serine/threonine- / dual specificity protein kinase, catalytic domain;Serine/threonine-protein kinase, active site;Protein kinase-like domain;Concanavalin A-like lectin/glucanase, subgroup;Protein kinase, ATP binding site;Tyrosine-protein kinase, catalytic domain;Malectin	-0.459367	0.503601	-1.02241	0.0504024	-1.5795	0.000367464			c	c
BnaA10g12480D	HAD-superfamily hydrolase, subfamily IA, variant 3;Pyrimidine 5-nucleotidase;HAD-like domain	-0.118118	0.949451	0.381714	0.645875	1.68034	0.000385704			c	c
BnaCnng69060D	Cytochrome P450;Cytochrome P450, E-class, group I;Cytochrome P450, conserved site	-0.345517	0.811768	-1.39906	0.0386202	-0.954642	0.142566		b		b
BnaA01g29880D	DnaJ domain;DnaJ domain, conserved site	0.658253	0.717281	0.646453	0.0977263	1.03998	0.000705695			c	c
BnaC08g48630D	SANT/Myb domain;Homeodomain-like;Myb domain	0.530449	0.793923	0.8767	0.398264	1.50094	0.0488628			c	c
BnaA04g04400D	Sphingomyelin synthase-like domain	-1.64819	0.378423	0.496776	0.559785	1.20928	0.026452			c	c
BnaA09g17290D	HAD-superfamily hydrolase, subfamily IA, variant 1;HAD-superfamily hydrolase, subfamily IA, REG-2-like;HAD-like domain	0.461295	0.838061	0.894002	0.226719	1.34555	0.0195789			c	c
BnaC06g30350D	no data	0.110584	0.957795	0.134206	0.907134	-1.23797	0.0305291			c	c
BnaC06g26320D	Protein of unknown function DUF707	-0.377038	0.827342	-3.51188	0.000120381	-1.53394	0.0854792		b		b
BnaCnng24010D	Leucine-rich repeat;Leucine rich repeat 4	-0.179749	0.975673	-2.06743	0.00368726	0.499129	0.536548		b		b
BnaC07g09620D	Leucine-rich repeat;Malectin	-1.40355	0.827071	-4.36331	0.000963331	-3.86265	0.000967425		b	c	bc
BnaC02g35150D	Sulfotransferase domain	0.108526	0.990069	-2.08022	0.0351148	-1.28925	0.166158		b		b
BnaA07g03200D	No apical meristem (NAM) protein	0.177202	0.96835	-1.46901	0.0159882	-1.44063	0.00795241		b	c	bc
BnaAnng24050D	Protein kinase, catalytic domain;Serine-threonine/tyrosine-protein kinase catalytic domain;Serine/threonine- / dual specificity protein kinase, catalytic domain;Gnk2-homologous domain;Serine/threonine-protein kinase, active site;Protein kinase-like domain;Concanavalin A-like lectin/glucanase, subgroup;Protein kinase, ATP binding site;Tyrosine-protein kinase, catalytic domain	-0.0914461	1	-5.87349	9.83324e-05	-2.55506	0.0564497		b		b
BnaC05g48970D	Pectate lyase/Amb allergen;Pectin lyase fold/virulence factor;Pectin lyase fold;AmbAllergen	-0.204859	0.791553	-0.536465	0.2979	-1.11439	0.00437356			c	c
BnaA03g21360D	GH3 auxin-responsive promoter	-2.37194	0.000779166	-1.23436	0.111239	-3.11964	2.73025e-07	a		c	ac
BnaC03g19520D	O-acyltransferase, WSD1, N-terminal;O-acyltransferase, WSD1, C-terminal	-0.358128	0.699539	1.59531	0.128626	3.30199	5.591e-05			c	c
BnaC01g19760D	Peptidase A1;Peptidase aspartic, active site;Aspartic peptidase	-0.766145	0.665977	0.0474623	0.981611	1.59522	0.0316162			c	c
BnaCnng45990D	Zinc finger, RING-CH-type;Zinc finger, RING/FYVE/PHD-type;Protein of unknown function DUF3675	-0.0150908	1	-0.293654	0.782695	1.11938	0.049953			c	c
BnaC08g46740D	Alpha/beta hydrolase fold-3	-0.214171	0.952054	0.932641	0.182116	1.3839	0.00789457			c	c
BnaC07g11700D	Zinc finger, C2H2;Zinc finger, C2H2-like	2.92109	0.0479465	0.623584	0.465187	0.853051	0.171195	a			a
BnaA02g07120D	Plant lipid transfer protein/Par allergen;Bifunctional inhibitor/plant lipid transfer protein/seed storage helical domain	0.995434	0.350989	3.71022	0.004676	8.09863	2.31907e-10		b	c	bc
BnaC04g31220D	Protein kinase, catalytic domain;Serine-threonine/tyrosine-protein kinase catalytic domain;Serine/threonine- / dual specificity protein kinase, catalytic domain;Serine/threonine-protein kinase, active site;Protein kinase-like domain;Concanavalin A-like lectin/glucanase, subgroup;Tyrosine-protein kinase, catalytic domain;Malectin-like carbohydrate-binding domain	-0.0598939	0.991855	-1.29896	0.0292428	0.0102676	0.990397		b		b
BnaA10g04460D	Exocyst complex protein Exo70;Cullin repeat-like-containing domain	-0.398006	0.931514	-3.36673	0.001003	-1.36269	0.167784		b		b
BnaAnng40250D	Terpene synthase, N-terminal domain;Terpenoid cyclases/protein prenyltransferase alpha-alpha toroid;Terpenoid synthase	1.26933	0.307787	2.03228	0.000205419	2.97585	1.82022e-09		b	c	bc
BnaA06g25550D	Senescence/spartin-associated	-0.685947	0.771816	1.0706	0.00621957	1.38973	8.11709e-05		b	c	bc
BnaC04g06550D	no data	1.83231	0.778404	-1.90048	0.0778531	-2.39805	0.00195765			c	c
BnaA08g29060D	Domain of unknown function DUF4378	-2.78038	0.632223	-4.53599	2.80302e-05	-1.67434	0.0168971		b	c	bc
BnaC08g34510D	Protein kinase, catalytic domain;Serine-threonine/tyrosine-protein kinase catalytic domain;Serine/threonine- / dual specificity protein kinase, catalytic domain;Serine/threonine-protein kinase, active site;Protein kinase-like domain;Concanavalin A-like lectin/glucanase, subgroup;Protein kinase, ATP binding site;Tyrosine-protein kinase, catalytic domain;Malectin-like carbohydrate-binding domain	-0.00710633	1	-1.43789	0.0298383	-1.33331	0.0287708		b	c	bc
BnaCnng27960D	Zinc finger, CCCH-type;Ankyrin repeat;Ankyrin repeat-containing domain	0.0937104	0.98394	-1.59351	0.0494466	-1.32217	0.0728843		b		b
BnaC02g40040D	Calmodulin binding protein-like	-2.42481	0.494059	-4.95868	9.4639e-05	-4.00608	0.000166717		b	c	bc
BnaA03g14300D	PMR5 N-terminal domain;PC-Esterase	-0.852131	0.432474	-2.31224	4.09117e-05	-2.41228	3.10746e-06		b	c	bc
BnaC01g13780D	Protein of unknown function DUF3537	0.30846	0.799878	0.572934	0.559795	2.23896	0.00014048			c	c
BnaA08g21730D	Catalase haem-binding site;Catalase immune-responsive domain;Catalase core domain;Catalase, mono-functional, haem-containing;Catalase-like domain	0.570845	0.441325	1.35521	0.00193741	1.13234	0.00836483		b	c	bc
BnaCnng45070D	EGF-type aspartate/asparagine hydroxylation site;Epidermal growth factor-like domain;EGF-like calcium-binding;Protein kinase-like domain;Concanavalin A-like lectin/glucanase, subgroup;EGF-like calcium-binding, conserved site;Wall-associated receptor kinase galacturonan-binding domain	-0.406947	0.811139	-3.15675	0.000383155	-2.4957	0.00193925		b	c	bc
BnaC08g20170D	Basic-leucine zipper domain;DOG1 domain	-2.22075	0.536138	-6.31609	8.7711e-06	-2.785	0.0181693		b	c	bc
BnaAnng00150D	Protein kinase, catalytic domain;Legume lectin domain;Serine/threonine- / dual specificity protein kinase, catalytic domain;Serine/threonine-protein kinase, active site;Concanavalin A-like lectin/glucanases superfamily;Protein kinase-like domain;Concanavalin A-like lectin/glucanase, subgroup;Protein kinase, ATP binding site;Tyrosine-protein kinase, catalytic domain	-0.870412	0.89468	-2.50258	0.00318181	-1.60597	0.0286769		b	c	bc
BnaA09g52250D	Protein kinase, catalytic domain;Serine-threonine/tyrosine-protein kinase catalytic domain;Serine/threonine- / dual specificity protein kinase, catalytic domain;Serine/threonine-protein kinase, active site;Light regulated Lir1;Protein kinase-like domain;Concanavalin A-like lectin/glucanase, subgroup;Protein kinase, ATP binding site;Tyrosine-protein kinase, catalytic domain	1.73833	2.07408e-07	3.41967	6.31853e-13	2.42887	8.38606e-08	a	b	c	abc
BnaA03g56840D	Cytochrome P450;Cytochrome P450, E-class, group I;Cytochrome P450, conserved site	0.000336818	1	-2.2398	0.0089899	-2.62482	0.000647797		b	c	bc
BnaA05g35790D	Proton-dependent oligopeptide transporter family;Major facilitator superfamily domain, general substrate transporter	-0.796699	0.931141	0.366669	0.892023	-2.1586	0.021077			c	c
BnaC04g39060D	no data	-0.410164	0.945658	-2.80505	0.00061426	-0.871586	0.301715		b		b
BnaCnng72730D	Aspartate/other aminotransferase;Aminotransferases, class-I, pyridoxal-phosphate-binding site;Aminotransferase, class I/classII;Pyridoxal phosphate-dependent transferase, major region, subdomain 2;Pyridoxal phosphate-dependent transferase	-0.390622	0.679428	0.844571	0.0376161	0.437344	0.28472		b		b
BnaA09g36850D	Remorin, C-terminal	0.947841	0.10082	1.55678	0.0217712	2.71007	2.1922e-06		b	c	bc
BnaC01g13470D	Multicopper oxidase, type 1;Cupredoxin;Multicopper oxidase, type 2;Multicopper oxidase, type 3	0.328979	0.706303	-0.91271	0.245946	-2.36134	0.000199632			c	c
BnaA08g11230D	Guanine nucleotide binding protein (G-protein), alpha subunit;G protein alpha subunit, helical insertion	-0.728801	0.773195	-1.83287	0.0233363	-0.236822	0.81249		b		b
BnaA01g24360D	Cation-transporting P-type ATPase;Cation-transporting P-type ATPase, N-terminal;Cation-transporting P-type ATPase, C-terminal;Calcium-transporting P-type ATPase, subfamily IIB;P-type ATPase, A domain;P-type ATPase, phosphorylation site;HAD-like domain;P-type ATPase, transmembrane domain;P-type ATPase, cytoplasmic domain N	-1.04372	0.81684	0.292382	0.803398	1.05337	0.0392655			c	c
BnaC05g11260D	Peptidyl-arginine deiminase, Porphyromonas-type	-0.403742	0.834941	-1.56721	0.0118236	-0.715639	0.258828		b		b
BnaC08g02750D	Leucine-rich repeat	-0.164325	0.912755	-0.260733	0.793807	-2.27746	2.56347e-06			c	c
BnaC07g50180D	Cellulose synthase;Zinc finger, RING/FYVE/PHD-type	-0.0307004	0.992262	-0.118471	0.884251	-0.975479	0.0179154			c	c
BnaC04g26670D	Sphingomyelin synthase-like domain	-1.02689	0.634551	0.918976	0.200735	1.3371	0.0189234			c	c
BnaC03g00010D	DNA repair protein RadA	-0.022604	0.99808	0.518436	0.39928	0.976509	0.0191574			c	c
BnaA06g09200D	Protein kinase, catalytic domain;Serine-threonine/tyrosine-protein kinase catalytic domain;Serine/threonine- / dual specificity protein kinase, catalytic domain;Serine/threonine-protein kinase, active site;Protein kinase-like domain;Protein kinase, ATP binding site;Tyrosine-protein kinase, catalytic domain	-0.558419	0.861634	-1.71978	0.0182865	-1.17484	0.076562		b		b
BnaC01g39300D	Protein kinase, catalytic domain;Legume lectin domain;Serine/threonine- / dual specificity protein kinase, catalytic domain;Serine/threonine-protein kinase, active site;Concanavalin A-like lectin/glucanases superfamily;Protein kinase-like domain;Concanavalin A-like lectin/glucanase, subgroup;Protein kinase, ATP binding site;Tyrosine-protein kinase, catalytic domain	-0.22757	0.965952	-2.22578	0.000619468	-1.02103	0.129957		b		b
BnaC04g56880D	Enolpyruvate transferase domain;3-phosphoshikimate 1-carboxyvinyltransferase;RNA 3'-terminal phosphate cyclase/enolpyruvate transferase, alpha/beta;3-phosphoshikimate 1-carboxyvinyltransferase, conserved site	0.0316276	0.989034	-0.0212673	0.983226	-1.00272	0.00681438			c	c
BnaC07g27870D	Aminotransferase, class IV	0.0895874	0.976046	-0.218333	0.861312	-1.57052	0.0094405			c	c
BnaA08g04510D	Multicopper oxidase, type 1;Cupredoxin;Multicopper oxidase, type 2;Multicopper oxidase, type 3	-0.08031	0.946015	-0.532812	0.49905	-1.5092	0.00505637			c	c
BnaC03g03740D	No apical meristem (NAM) protein	0.605209	0.852564	-1.54108	0.0234585	-0.192096	0.825982		b		b
BnaA02g24690D	Mitochondrial substrate/solute carrier;Mitochondrial carrier domain	-0.764962	0.0166242	-1.28599	0.00540727	-0.564852	0.272958	a	b		ab
BnaAnng26220D	Lipase, class 3	-0.218509	0.908159	-0.213974	0.824799	1.02001	0.0394256			c	c
BnaCnng65920D	Protein of unknown function DUF597	0.185105	0.911292	-0.268378	0.740902	-0.945071	0.0416619			c	c
BnaA09g41810D	Tetraspanin;Tetraspanin/Peripherin;Tetraspanin, conserved site	-0.766994	0.899634	-1.58104	0.0164098	0.137336	0.869252		b		b
BnaA07g26100D	Toll/interleukin-1 receptor homology (TIR) domain;Disease resistance protein;Leucine-rich repeat;NB-ARC;Leucine-rich repeat 3	-1.11313	0.634303	0.252689	0.867102	1.59254	0.0215549			c	c
BnaCnng13910D	Fatty acid hydroxylase	0.426125	0.897177	-1.42455	0.214037	-1.97823	0.0240853			c	c
BnaA10g21860D	ENTH/VHS;AP180 N-terminal homology (ANTH) domain;Epsin-like, N-terminal	-0.502604	0.964399	-3.58034	5.40031e-05	-1.35919	0.0783326		b		b
BnaC01g15700D	no data	1.31873	0.00511951	-0.595109	0.617327	-0.740785	0.367551	a			a
BnaA05g31120D	no data	-0.730498	0.0106933	0.0119702	0.993799	0.730628	0.225095	a			a
BnaCnng19020D	U box domain;Armadillo-like helical;Zinc finger, RING/FYVE/PHD-type;Armadillo-type fold	0.604846	0.846322	-1.32821	0.0384177	-0.610139	0.337121		b		b
BnaA01g05060D	DNA-binding WRKY	-0.943231	0.676096	-2.96778	0.000108478	-0.837596	0.30916		b		b
BnaC08g42900D	Sugar/inositol transporter;General substrate transporter;Sugar transporter, conserved site;Major facilitator superfamily domain, general substrate transporter;Major facilitator superfamily domain	-0.760496	0.710893	-2.71658	0.0439292	-1.66745	0.143695		b		b
BnaCnng17470D	Multi antimicrobial extrusion protein	-0.907371	0.724304	-6.08277	9.69759e-06	-5.05815	2.22106e-05		b	c	bc
BnaA09g24130D	no data	0.803991	0.693374	1.45536	0.0421379	1.56751	0.0136594		b	c	bc
BnaA05g14440D	Protein kinase, catalytic domain;Serine-threonine/tyrosine-protein kinase catalytic domain;Leucine-rich repeat;Serine/threonine- / dual specificity protein kinase, catalytic domain;Serine/threonine-protein kinase, active site;Protein kinase-like domain;Concanavalin A-like lectin/glucanase, subgroup;Tyrosine-protein kinase, catalytic domain;Malectin	-0.621803	0.535542	-1.18963	0.0136949	-1.42758	0.00116958		b	c	bc
BnaC07g12370D	B3 DNA binding domain;DNA-binding pseudobarrel domain	1.59972	0.0051125	0.727737	0.698105	0.711003	0.618854	a			a
BnaA03g26510D	Peptidase S9B, dipeptidylpeptidase IV N-terminal;Six-bladed beta-propeller, TolB-like;WD40-like Beta Propeller;WD40/YVTN repeat-like-containing domain	0.501767	0.761247	-2.44784	0.00368005	-1.91618	0.0143092		b	c	bc
BnaCnng60750D	Pectinesterase, catalytic;Pectinesterase inhibitor;Pectin lyase fold/virulence factor;Pectin lyase fold;Pectinesterase, active site	-0.978734	0.623968	-4.57887	4.20029e-06	-3.25636	0.000183858		b	c	bc
BnaA03g16650D	Zinc finger, AN1-type;Zinc finger, A20-type	0.145348	0.924377	-0.850065	0.0573397	-1.98086	9.44214e-08			c	c
BnaA09g08470D	Glycoside hydrolase, family 1;Glycoside hydrolase, catalytic domain;Glycoside hydrolase, superfamily;Glycoside hydrolase, family 1, active site	-0.133076	0.969856	-0.366629	0.778997	-1.51294	0.0345035			c	c
BnaA09g51620D	No apical meristem (NAM) protein	-1.1797	0.734548	-1.47106	0.0088065	0.167274	0.824224		b		b
BnaA09g51370D	no data	0.398243	0.943562	0.89855	0.569788	2.37342	0.01733			c	c
BnaA03g40020D	Target SNARE coiled-coil domain;SNAP-25	-0.516616	0.775103	-1.85065	0.00991659	-0.954442	0.182843		b		b
BnaC01g38680D	Calcium-binding EF-hand;EF-hand-like domain;EF-Hand 1, calcium-binding site	0.00118227	1	0.598192	0.546419	1.32127	0.0439083			c	c
BnaA08g20970D	Basic-leucine zipper domain;DOG1 domain	-0.471675	0.956527	-6.04456	0.000149306	-3.08363	0.024886		b	c	bc
BnaA05g10560D	Leucine-rich repeat	-0.212294	1	-2.47662	0.0250106	0.49062	0.635928		b		b
BnaA09g13830D	Protein of unknown function DUF707	0.210539	0.811673	0.948964	0.0194424	0.332209	0.472659		b		b
BnaC09g18280D	HAD-superfamily hydrolase, subfamily IA, variant 1;HAD-superfamily hydrolase, subfamily IA, REG-2-like;HAD-like domain	0.398534	0.86357	0.719293	0.310141	1.21715	0.020414			c	c
BnaA03g45570D	Zinc finger, AN1-type;Zinc finger, A20-type	0.965436	0.199602	0.906051	0.0318543	0.848658	0.029967		b	c	bc
BnaC08g08580D	no data	0.182533	0.95419	1.33399	0.0419049	3.31227	4.56824e-10		b	c	bc
BnaA09g18890D	Pyridoxal phosphate-dependent decarboxylase;Glutamate decarboxylase;Pyridoxal phosphate-dependent transferase, major region, subdomain 1;Pyridoxal phosphate-dependent transferase	-2.7687	0.615174	-6.24396	5.30916e-06	-1.16821	0.27342		b		b
BnaCnng78440D	Heavy metal-associated domain, HMA	0.42711	0.891906	-2.80235	0.00545466	-1.33506	0.165878		b		b
BnaA09g04780D	Cryptochrome/DNA photolyase, class 1;tRNA (guanine-N-7) methyltransferase;DNA photolyase, FAD-binding/Cryptochrome, C-terminal;DNA photolyase, N-terminal;Cryptochrome, DASH;Rossmann-like alpha/beta/alpha sandwich fold	-0.640853	0.342412	-1.63133	0.00157016	-0.630853	0.267724		b		b
BnaA04g01770D	no data	-3.38029	0.496399	-5.41006	0.000108805	-3.53541	0.0055948		b	c	bc
BnaA07g28450D	Glutathione S-transferase, N-terminal;Glutathione S-transferase, C-terminal-like;Thioredoxin-like fold;Glutathione S-transferase/chloride channel, C-terminal	-1.41378	0.352241	-2.3648	0.00318341	-2.16379	0.00294729		b	c	bc
BnaC08g15830D	Domain of unknown function DUF292, eukaryotic	-0.0846903	0.997114	-1.24012	0.155436	-1.59004	0.0115579			c	c
BnaA03g23660D	Selenoprotein SelK/SelG	0.520801	0.56789	0.671504	0.177634	1.49418	7.93743e-05			c	c
BnaA05g34540D	Zinc finger, CCCH-type;Ankyrin repeat;Ankyrin repeat-containing domain	0.544169	0.846593	-2.50011	2.30625e-05	-1.61632	0.00378923		b	c	bc
BnaC03g24830D	DC1;C1-like	-3.92429	0.268564	-6.58187	2.53224e-05	-7.14582	4.17722e-07		b	c	bc
BnaC01g13360D	Protein kinase, catalytic domain;Calcium-binding EF-hand;Serine/threonine- / dual specificity protein kinase, catalytic domain;Serine/threonine-protein kinase, active site;Protein kinase-like domain;EF-hand-like domain;Protein kinase, ATP binding site;EF-Hand 1, calcium-binding site;Tyrosine-protein kinase, catalytic domain	-0.114701	0.971088	-0.663549	0.462121	1.24205	0.0434334			c	c
BnaA09g14980D	Toll/interleukin-1 receptor homology (TIR) domain	-0.374707	0.818374	0.526799	0.29123	0.775608	0.0281547			c	c
BnaA05g25420D	Transcription factor GRAS	1.51861	0.00488828	0.925541	0.12519	1.46209	0.00235126	a		c	ac
BnaC06g10920D	Methyltransferase type 11	-0.147132	0.973081	-1.95817	0.0295051	-1.75952	0.0257457		b	c	bc
BnaA02g10720D	Heavy metal-associated domain, HMA	0.415614	0.95405	-2.6865	0.0128916	-1.27664	0.200056		b		b
BnaC01g02240D	no data	-1.3643	0.858612	-2.38259	0.05609	-2.82028	0.00245504			c	c
BnaC09g03670D	Sugar/inositol transporter;General substrate transporter;Sugar transporter, conserved site	1.61417	0.265734	-4.24207	0.00397846	-2.70836	0.0489867		b	c	bc
BnaA05g15310D	AMP-dependent synthetase/ligase;AMP-binding, conserved site;Domain of unknown function DUF4009	1.07784	0.00154268	0.36986	0.433114	0.780876	0.0174934	a		c	ac
BnaC06g41000D	Uncharacterised protein family UPF0136, Transmembrane	0.802729	0.604169	-1.52088	0.0430451	-1.37696	0.0384786		b	c	bc
BnaC04g11770D	Zinc finger, CCCH-type	0.0620703	0.994647	0.225306	0.840628	1.30595	0.0154337			c	c
BnaA07g12290D	Protein kinase, catalytic domain;Serine/threonine- / dual specificity protein kinase, catalytic domain;Serine/threonine-protein kinase, active site;Protein kinase-like domain;Protein kinase, ATP binding site;Tyrosine-protein kinase, catalytic domain	0.256303	0.78482	1.04666	0.000434016	0.116467	0.7818		b		b
BnaC04g06810D	no data	0.451623	0.965102	0.236811	0.916989	1.86678	0.0199072			c	c
BnaC07g31080D	Target SNARE coiled-coil domain;SNAP-25	-0.505813	0.787449	-1.42596	0.0358312	-0.135312	0.878455		b		b
BnaA01g26180D	U box domain;Armadillo-like helical;Zinc finger, RING/FYVE/PHD-type;Armadillo-type fold	0.621927	0.754512	0.0937929	0.947877	1.18099	0.0488544			c	c
BnaCnng10860D	MATH;TRAF-like	-0.571666	0.852148	-1.47117	0.0131387	-0.470584	0.472723		b		b
BnaA10g29490D	C2 calcium-dependent membrane targeting;Phospholipase C, phosphatidylinositol-specific , X domain;Phosphoinositide phospholipase C;Phospholipase C, phosphatidylinositol-specific, Y domain;C2 calcium/lipid-binding domain, CaLB;EF-hand-like domain;Phospholipase C, phosphoinositol-specific, EF-hand-like;PLC-like phosphodiesterase, TIM beta/alpha-barrel domain;C2 membrane targeting protein	-0.994572	0.0280118	-0.725507	0.0552874	-0.299839	0.468816	a			a
BnaC09g11080D	AP2/ERF domain;DNA-binding, integrase-type	-0.867838	0.0179095	-0.230791	0.816642	-0.818512	0.109163	a			a
BnaAnng22510D	LURP1-like domain;Tubby C-terminal-like domain	-2.8761	0.291314	-3.65687	0.00938366	-1.47486	0.277056		b		b
BnaC08g44020D	Leucine-rich repeat	-0.160546	0.94294	-2.57658	0.000648177	-1.70978	0.0169104		b	c	bc
BnaC03g57120D	Pectinesterase inhibitor	0.329109	0.895045	-1.23061	0.0234458	-0.594981	0.287916		b		b
BnaC05g12850D	no data	0.517554	0.801952	1.19877	0.00373279	0.958256	0.00727956		b	c	bc
BnaA04g25900D	AP2/ERF domain;DNA-binding, integrase-type	2.57091	0.0316006	0.867498	0.654991	1.17135	0.38086	a			a
BnaA05g01410D	DNA-binding WRKY	0.83534	0.778299	-1.86345	0.0115746	-0.833258	0.261425		b		b
BnaA05g04020D	Glycoside hydrolase, family 1;Glycoside hydrolase, catalytic domain;Glycoside hydrolase, superfamily	1.59466	0.0252501	1.56228	0.154613	2.28951	0.0171838	a		c	ac
BnaC09g07260D	Lateral organ boundaries, LOB	0.719612	0.57429	1.56357	0.0220361	0.367568	0.711129		b		b
BnaC07g11810D	Bifunctional inhibitor/plant lipid transfer protein/seed storage helical domain	-0.422533	0.847457	1.40722	0.0131649	1.27015	0.017306		b	c	bc
BnaC04g49640D	Glycoside hydrolase, family 1;Glycoside hydrolase, catalytic domain;Glycoside hydrolase, superfamily;Glycoside hydrolase, family 1, active site	1.47621	0.351815	0.10803	0.978641	4.79832	0.0148656			c	c
BnaC09g49710D	SANT/Myb domain;Myb domain, plants;Homeodomain-like;SANT domain;Myb domain	-0.299462	0.7256	-0.966381	0.0133077	-1.51233	2.12085e-05		b	c	bc
BnaCnng54110D	Heat shock factor (HSF)-type, DNA-binding;Winged helix-turn-helix transcription repressor DNA-binding domain	3.66741	0.0448162	4.73204	7.43124e-13	5.5929	2.13432e-15	a	b	c	abc
BnaC06g40530D	Pyrophosphate-energised proton pump	0.692441	0.583247	0.872402	0.0582893	1.61273	2.39296e-05			c	c
BnaC03g72660D	Protein kinase, catalytic domain;S-locus glycoprotein;Serine-threonine/tyrosine-protein kinase catalytic domain;Bulb-type lectin domain;Serine/threonine- / dual specificity protein kinase, catalytic domain;Apple-like;Serine/threonine-protein kinase, active site;Protein kinase-like domain;PAN-2 domain;Protein kinase, ATP binding site;Tyrosine-protein kinase, catalytic domain;S-locus receptor kinas…	-3.66404	0.370571	-6.85626	4.35666e-05	-3.3314	0.0129189		b	c	bc
BnaA01g09360D	Protein of unknown function DUF707	-0.4157	0.765585	0.41291	0.567736	1.41328	0.000985776			c	c
BnaC07g29150D	BURP domain	0.358698	0.799929	0.8359	0.138168	1.66475	0.000180204			c	c
BnaC03g08460D	Cellulose synthase;Zinc finger, RING/FYVE/PHD-type	0.0721549	0.95629	-0.163574	0.788322	-0.761269	0.0260982			c	c
BnaC08g30150D	F-box domain, cyclin-like;Kelch repeat type 1;Galactose oxidase, beta-propeller	0.938836	0.114031	1.25074	0.0139057	1.64092	0.000396054		b	c	bc
BnaA08g25370D	Protein kinase, catalytic domain;S-locus glycoprotein;Serine-threonine/tyrosine-protein kinase catalytic domain;Bulb-type lectin domain;Serine/threonine- / dual specificity protein kinase, catalytic domain;Apple-like;Serine/threonine-protein kinase, active site;Protein kinase-like domain;PAN-2 domain;Concanavalin A-like lectin/glucanase, subgroup;Protein kinase, ATP binding site;Tyrosine-protein …	1.85395	0.779354	-5.99287	0.00144262	-4.7728	0.00209336		b	c	bc
BnaC08g05600D	Basic-leucine zipper domain	-2.45984e-05	1	-1.24781	0.0296464	0.0807856	0.919801		b		b
BnaC03g72210D	Protein kinase, catalytic domain;Serine/threonine- / dual specificity protein kinase, catalytic domain;Serine/threonine-protein kinase, active site;Protein kinase-like domain;Protein kinase, ATP binding site;Tyrosine-protein kinase, catalytic domain	-0.0609318	0.987508	0.426013	0.780242	-2.14079	0.0359878			c	c
BnaC06g30990D	Protein of unknown function DUF569;Actin cross-linking	0.132359	0.989134	-2.72981	0.00723894	-1.81004	0.0432919		b	c	bc
BnaA07g24600D	Very-long-chain 3-ketoacyl-CoA synthase;FAE1/Type III polyketide synthase-like protein;3-Oxoacyl-[acyl-carrier-protein (ACP)] synthase III C-terminal;Thiolase-like, subgroup;Thiolase-like	-0.219325	0.796478	0.331458	0.601721	1.26836	0.000595671			c	c
BnaC09g44630D	Alpha crystallin/Hsp20 domain;HSP20-like chaperone	2.52521	0.137918	6.82924	7.07135e-25	6.00901	1.99383e-28		b	c	bc
BnaC03g74610D	no data	-2.9036	0.368479	-7.08713	2.69613e-05	-4.15952	0.00242941		b	c	bc
BnaC08g44030D	no data	-0.471446	0.779041	-3.0223	0.00266707	-1.62173	0.0947826		b		b
BnaAnng07060D	AP2/ERF domain;DNA-binding, integrase-type	1.22523	0.618219	-2.46184	0.00764318	-0.949268	0.300705		b		b
BnaC08g39210D	Uncharacterised protein family Cys-rich	-0.417987	0.943061	-4.18558	0.00125331	-1.59125	0.17934		b		b
BnaA01g12920D	Protein kinase, catalytic domain;Serine-threonine/tyrosine-protein kinase catalytic domain;Serine/threonine- / dual specificity protein kinase, catalytic domain;Gnk2-homologous domain;Serine/threonine-protein kinase, active site;Protein kinase-like domain;Concanavalin A-like lectin/glucanase, subgroup;Protein kinase, ATP binding site;Tyrosine-protein kinase, catalytic domain	-1.01528	0.17382	-2.04561	0.00248312	-1.26477	0.0596911		b		b
BnaC03g36940D	Wound-induced protein, Wun1;Wound-induced protein, Wun1, subgroup	0.438385	0.906522	1.40867	0.00287262	1.41503	0.000310005		b	c	bc
BnaA10g04210D	Alpha crystallin/Hsp20 domain;HSP20-like chaperone	0.451692	0.422245	1.14195	0.0281155	1.45298	0.00169124		b	c	bc
BnaA08g10530D	Protein kinase, catalytic domain;Serine-threonine/tyrosine-protein kinase catalytic domain;Serine/threonine- / dual specificity protein kinase, catalytic domain;Gnk2-homologous domain;Serine/threonine-protein kinase, active site;Protein kinase-like domain;Concanavalin A-like lectin/glucanase, subgroup;Protein kinase, ATP binding site;Tyrosine-protein kinase, catalytic domain	0.0201322	1	-3.07497	0.0074426	-0.800501	0.490357		b		b
BnaC07g30000D	6-phosphogluconolactonase, DevB-type;Glucosamine/galactosamine-6-phosphate isomerase	0.215091	0.946753	2.80915	0.127247	4.46995	0.00619094			c	c
BnaA06g05880D	DOG1 domain	-1.64635	0.692461	0.188434	0.922678	2.02457	0.00202219			c	c
BnaC01g22480D	Domain of unknown function DUF221	-0.285425	0.84399	-1.46133	0.000171758	-1.35341	0.000370924		b	c	bc
BnaA04g15720D	Late embryogenesis abundant protein, LEA-14	0.437875	0.711815	0.334531	0.632189	0.772582	0.0483071			c	c
BnaA08g11440D	Male sterility, NAD-binding;NAD(P)-binding domain;Fatty acyl-CoA reductase	-0.94217	0.119654	-0.708296	0.210631	-2.80832	2.62129e-11			c	c
BnaA06g34840D	C2 calcium-dependent membrane targeting;C2 calcium/lipid-binding domain, CaLB;C2 membrane targeting protein	-0.189758	0.882348	0.662801	0.130897	0.979863	0.00559943			c	c
BnaCnng45080D	no data	-0.298363	0.903754	-2.91321	0.000176067	-2.976	2.56177e-05		b	c	bc
BnaC05g42510D	Globin;Leghaemoglobin;Globin-like;Globin, structural domain;Leghaemoglobin, iron-binding site	0.496569	0.472927	-0.00675919	0.996393	-1.25878	0.0184973			c	c
BnaC08g26820D	no data	-0.676502	0.89545	-1.95112	0.00627271	-0.254723	0.765933		b		b
BnaA09g31660D	Epoxide hydrolase-like	-3.24953	0.494059	-5.07885	0.00118812	-4.04579	0.00511979		b	c	bc
BnaC07g01350D	no data	0.314373	0.925746	0.427739	0.583026	1.21984	0.00994609			c	c
BnaCnng39490D	Protein kinase, catalytic domain;Serine/threonine- / dual specificity protein kinase, catalytic domain;Serine/threonine-protein kinase, active site;Protein kinase-like domain;Tyrosine-protein kinase, catalytic domain;Leucine rich repeat 4	0.315292	0.818374	-2.78916	0.00225771	-1.96293	0.0208898		b	c	bc
BnaC02g33230D	Bax inhibitor 1, conserved site;Bax inhibitor 1-related	-0.0787048	0.969124	0.207906	0.804278	1.48874	0.00021841			c	c
BnaA02g36210D	YTH domain	-0.226219	0.864041	0.890395	0.13454	1.43729	0.00266115			c	c
BnaAnng15480D	Protein kinase, catalytic domain;Serine/threonine- / dual specificity protein kinase, catalytic domain;Serine/threonine-protein kinase, active site;Protein kinase-like domain;Concanavalin A-like lectin/glucanase, subgroup;Protein kinase, ATP binding site;Tyrosine-protein kinase, catalytic domain	-0.0124084	1	0.390786	0.548951	1.73671	1.93778e-06			c	c
BnaC08g02330D	Protein kinase, catalytic domain;Serine/threonine- / dual specificity protein kinase, catalytic domain;Serine/threonine-protein kinase, active site;Protein kinase-like domain;Concanavalin A-like lectin/glucanase, subgroup;Protein kinase, ATP binding site;Tyrosine-protein kinase, catalytic domain	0.0266338	1	0.159557	0.886655	1.28352	0.0103393			c	c
BnaC02g01720D	DNA-binding WRKY	-0.126245	0.983282	-3.88293	0.00206654	-4.13928	0.000229596		b	c	bc
BnaC08g39520D	Leucine-rich repeat;Leucine-rich repeat, typical subtype;Leucine-rich repeat-containing N-terminal, type 2;Leucine rich repeat 4	-0.51432	0.955809	-4.0044	0.000794643	-2.4393	0.00876186		b	c	bc
BnaA07g14370D	Protein kinase, catalytic domain;Serine/threonine- / dual specificity protein kinase, catalytic domain;Serine/threonine-protein kinase, active site;Protein kinase-like domain;Concanavalin A-like lectin/glucanase, subgroup;Protein kinase, ATP binding site;Tyrosine-protein kinase, catalytic domain;Wall-associated receptor kinase galacturonan-binding domain	-0.252168	0.955705	-2.51573	0.00870609	-2.50709	0.0044895		b	c	bc
BnaA06g01060D	Calcium-binding EF-hand;Sodium/calcium exchanger membrane region;EF-hand-like domain;EF-Hand 1, calcium-binding site	-0.649366	0.742671	0.520552	0.438995	1.18325	0.00984425			c	c
BnaA08g22060D	Protein of unknown function DUF1195	-0.229932	0.941131	-0.861944	0.132495	-1.01916	0.0334833			c	c
BnaC03g53500D	Myc-type, basic helix-loop-helix (bHLH) domain	0.2086	0.874502	0.297515	0.584399	0.738542	0.0258893			c	c
BnaA08g14950D	Protein kinase, catalytic domain;Serine-threonine/tyrosine-protein kinase catalytic domain;Serine/threonine- / dual specificity protein kinase, catalytic domain;Serine/threonine-protein kinase, active site;Protein kinase-like domain;Concanavalin A-like lectin/glucanase, subgroup;Protein kinase, ATP binding site;Tyrosine-protein kinase, catalytic domain	-0.379672	0.778397	-1.18368	0.0785234	-2.36632	1.48857e-05			c	c
BnaCnng22970D	Peptidase S10, serine carboxypeptidase	-0.915562	0.0192033	-0.543768	0.643052	0.966194	0.210054	a			a
BnaA05g04060D	Glycoside hydrolase, family 1;Glycoside hydrolase, catalytic domain;Glycoside hydrolase, superfamily;Glycoside hydrolase, family 1, active site	-0.0379824	0.995814	-2.65492	0.00146714	-2.36576	0.00209675		b	c	bc
BnaC08g38530D	Protein kinase, catalytic domain;Serine/threonine- / dual specificity protein kinase, catalytic domain;Serine/threonine-protein kinase, active site;Protein kinase-like domain;Concanavalin A-like lectin/glucanase, subgroup;Wall-associated kinase;EGF-like calcium-binding, conserved site;Tyrosine-protein kinase, catalytic domain;Wall-associated receptor kinase galacturonan-binding domain	-4.21576	0.188796	-3.05795	0.0054256	-3.07239	0.00091477		b	c	bc
BnaC03g48030D	Peptidase A1;Peptidase aspartic, active site;Aspartic peptidase	-0.599173	0.425747	-1.62194	0.0114923	-1.29102	0.034012		b	c	bc
BnaA03g27420D	Drug/metabolite transporter;Tpt phosphate/phosphoenolpyruvate translocator;Domain of unknown function DUF250	-0.546073	0.336001	-1.1005	0.00372042	-0.804047	0.0447575		b	c	bc
BnaC02g31850D	Ribosomal protein L5;Ribosomal protein L5, conserved site;Ribosomal protein L5 domain	-0.277581	0.734695	-0.138842	0.871113	-0.910514	0.0275409			c	c
BnaA04g05410D	U box domain;Armadillo-like helical;Zinc finger, RING/FYVE/PHD-type;Armadillo-type fold	-0.272173	0.976358	-2.6089	0.000713347	-1.49953	0.00826278		b	c	bc
BnaA10g27930D	Lipase, class 3	1.06337	0.605138	1.02415	0.236666	1.37377	0.0481641			c	c
BnaA05g30860D	Six-hairpin glycosidase-like;Glycosyl hydrolase family 100	0.162007	0.978627	1.12245	0.0525687	1.98656	3.2322e-05			c	c
BnaA03g46170D	Bet v I domain;START-like domain;Major latex protein domain	-0.53778	0.516562	1.88082	0.0955859	2.24101	0.022262			c	c
BnaA09g30680D	UDP-glucuronosyl/UDP-glucosyltransferase	-1.56102	0.502537	-2.18721	0.00112079	-3.49807	2.97794e-10		b	c	bc
BnaC03g51710D	Pectinesterase inhibitor	0.487425	0.948568	1.25791	0.205061	2.42013	1.16933e-07			c	c
BnaCnng56300D	no data	-0.106401	0.930812	0.0972735	0.882778	0.743437	0.0167642			c	c
BnaC03g55640D	Histone H2B;Histone core;Histone-fold	0.461453	0.675109	0.189361	0.92029	-2.13991	0.0149428			c	c
BnaA03g12520D	Heavy metal-associated domain, HMA	0.564869	0.763062	-3.52652	0.00594582	-1.9715	0.0856717		b		b
BnaC04g31720D	Zinc finger, Dof-type	-0.276456	0.731299	-1.05489	0.000137078	-1.65283	1.28593e-11		b	c	bc
BnaA06g13080D	Protein kinase, catalytic domain;Calcium-binding EF-hand;Serine/threonine- / dual specificity protein kinase, catalytic domain;Serine/threonine-protein kinase, active site;Protein kinase-like domain;EF-hand-like domain;Protein kinase, ATP binding site;EF-Hand 1, calcium-binding site;Tyrosine-protein kinase, catalytic domain	-0.944628	0.252566	-1.60439	0.00082247	-0.730681	0.14611		b		b
BnaCnng02430D	Protein kinase, catalytic domain;Serine-threonine/tyrosine-protein kinase catalytic domain;Serine/threonine- / dual specificity protein kinase, catalytic domain;Serine/threonine-protein kinase, active site;Protein kinase-like domain;Protein kinase, ATP binding site;Tyrosine-protein kinase, catalytic domain	-1.22196	0.00366219	-2.09622	0.000276192	-2.16207	5.78655e-05	a	b	c	abc
BnaA02g30100D	Protein kinase, catalytic domain;Serine-threonine/tyrosine-protein kinase catalytic domain;Leucine-rich repeat;Serine/threonine- / dual specificity protein kinase, catalytic domain;Protein kinase-like domain;Leucine-rich repeat-containing N-terminal, type 2;Concanavalin A-like lectin/glucanase, subgroup;Tyrosine-protein kinase, catalytic domain	-0.32049	0.936183	-2.06571	0.0284739	-0.703148	0.465635		b		b
BnaAnng00400D	Histone H2A;Histone core;Histone-fold	0.116581	0.961421	1.21089	0.00660122	0.610018	0.146445		b		b
BnaC09g50770D	SANT/Myb domain;Myb domain, plants;Homeodomain-like;Myb domain	0.765906	0.879825	-1.29864	0.257673	-1.64416	0.0433723			c	c
BnaC09g24710D	Cytochrome c, class IA/ IB;Cytochrome c, class I;Cytochrome c domain	0.166221	0.970669	-0.334641	0.733634	1.04512	0.048104			c	c
BnaC03g16140D	Chaperonin ClpA/B;AAA+ ATPase domain;ATPase, AAA-type, core;Clp, N-terminal;ATPase, AAA-2;Chaperonin ClpA/B, conserved site;Clp ATPase, C-terminal;Double Clp-N motif	-0.0486294	0.994146	-1.64724	0.0440082	-1.24056	0.102564		b		b
BnaC09g45580D	Protein kinase, catalytic domain;Serine/threonine- / dual specificity protein kinase, catalytic domain;NAF domain;Serine/threonine-protein kinase, active site;Protein kinase-like domain;Protein kinase, ATP binding site;NAF/FISL domain;Tyrosine-protein kinase, catalytic domain;Calcium/calmodulin-dependent/calcium-dependent protein kinase	0.807122	0.321083	2.7077	0.000247876	3.42917	3.26691e-07		b	c	bc
BnaA02g09850D	Major sperm protein;PapD-like	-0.0666945	0.975673	-0.908837	0.0388287	-0.993267	0.0117461		b	c	bc
BnaA03g53940D	Cytochrome P450;Cytochrome P450, E-class, group I;Cytochrome P450, conserved site	0.485116	0.730132	-3.38334	0.00224201	-1.78846	0.0896184		b		b
BnaA10g18370D	S-adenosyl-l-methionine decarboxylase leader peptide	-0.513543	0.443522	-0.396457	0.378721	0.685067	0.0355068			c	c
BnaCnng59530D	GH3 auxin-responsive promoter	-1.80679	0.00423708	-1.02019	0.120847	-2.70244	1.89677e-07	a		c	ac
BnaC04g41340D	BTB/POZ-like;Coagulation factor 5/8 C-terminal type domain;Galactose-binding domain-like;BTB/POZ fold;BTB/Kelch-associated;BTB/POZ;Farnesoic acid O-methyl transferase	0.394217	0.69532	1.76876	0.000247392	1.23121	0.0102904		b	c	bc
BnaA06g33840D	K Homology domain;K Homology domain, type 1	-0.741482	0.725465	0.0845918	0.949567	1.08451	0.0476163			c	c
BnaC02g09350D	Leucine-rich repeat;Leucine rich repeat 4	-0.299895	0.878558	-1.70327	0.0048763	-0.448405	0.532807		b		b
BnaC01g19520D	Protein of unknown function DUF1223;Thioredoxin-like fold	-0.786627	0.724304	-2.11942	5.40031e-05	0.0432585	0.952976		b		b
BnaC03g74360D	no data	0.909272	0.06564	1.62231	0.00010274	2.8193	2.47239e-13		b	c	bc
BnaCnng58310D	F-box domain, cyclin-like;FBD;Leucine-rich repeat 2	-1.13438	0.531026	-2.66954	0.00162298	-1.50754	0.0600967		b		b
BnaC02g07560D	Disease resistance protein;Leucine-rich repeat;NB-ARC;Leucine-rich repeat 3	0.3637	0.918968	-2.35522	0.00758744	-1.64754	0.0476002		b	c	bc
BnaC04g28280D	ABC transporter-like;AAA+ ATPase domain;ABC-2 type transporter;ABC transporter, conserved site	-1.5123	0.438175	-0.119431	0.926275	1.56249	0.00170227			c	c
BnaA06g30810D	Protein of unknown function DUF1675	1.20045	0.357399	1.58342	0.00579299	2.64374	1.31499e-07		b	c	bc
BnaA03g28150D	Armadillo-like helical;Armadillo-type fold	-0.669538	0.955809	-4.46558	2.99307e-05	-2.74358	0.00128898		b	c	bc
BnaC06g35340D	SANT/Myb domain;Homeodomain-like;Myb domain	0.688148	0.753308	1.9006	0.0150103	2.67862	0.000151571		b	c	bc
BnaC06g23720D	no data	-0.906142	0.582985	0.582717	0.328859	1.412	0.000313849			c	c
BnaA07g32020D	NmrA-like;NAD(P)-binding domain	-0.36498	0.921298	-4.52018	0.00101103	-1.52779	0.227408		b		b
BnaA09g29270D	Zinc finger, Dof-type	-1.67108	2.27184e-06	-2.13827	1.89543e-07	-1.92658	1.7226e-06	a	b	c	abc
BnaC01g15630D	High mobility group (HMG) box domain	1.06675	0.0367496	0.464736	0.828409	-0.218643	0.892044	a			a
BnaA03g36840D	Domain of unknown function DUF3700	0.22961	0.918358	0.503658	0.806523	2.44165	0.0440584			c	c
BnaC06g35270D	Protein kinase, catalytic domain;Leucine-rich repeat;Serine/threonine- / dual specificity protein kinase, catalytic domain;Leucine-rich repeat, typical subtype;Serine/threonine-protein kinase, active site;Protein kinase-like domain;Concanavalin A-like lectin/glucanase, subgroup;Protein kinase, ATP binding site;Tyrosine-protein kinase, catalytic domain;Leucine rich repeat 4	-0.0314688	1	-2.92267	0.0043982	-2.01271	0.0289471		b	c	bc
BnaA06g30260D	Protein kinase, catalytic domain;Serine-threonine/tyrosine-protein kinase catalytic domain;Serine/threonine- / dual specificity protein kinase, catalytic domain;Concanavalin A-like lectin/glucanase, subgroup;Tyrosine-protein kinase, catalytic domain	0.108936	0.970595	-1.7168	0.0252537	-1.42804	0.0404169		b	c	bc
BnaC03g73840D	Sugar/inositol transporter;General substrate transporter;Sugar transporter, conserved site;Major facilitator superfamily domain, general substrate transporter;Major facilitator superfamily domain	-0.684165	0.788925	-2.32174	0.0174585	-3.47376	4.87533e-05		b	c	bc
BnaC06g15710D	PMR5 N-terminal domain;PC-Esterase	0.119111	0.964389	0.163758	0.901422	-1.74724	0.0106315			c	c
BnaC07g06290D	Protein kinase, catalytic domain;Serine/threonine- / dual specificity protein kinase, catalytic domain;Serine/threonine-protein kinase, active site;Concanavalin A-like lectin/glucanase, subgroup;Protein kinase, ATP binding site;Tyrosine-protein kinase, catalytic domain	-0.25366	0.931472	-1.88077	0.0113638	-0.38649	0.657946		b		b
BnaC07g28970D	Protein kinase, catalytic domain;Leucine-rich repeat;Serine/threonine- / dual specificity protein kinase, catalytic domain;Leucine-rich repeat, typical subtype;Serine/threonine-protein kinase, active site;Protein kinase-like domain;Leucine-rich repeat-containing N-terminal, type 2;Protein kinase, ATP binding site;Tyrosine-protein kinase, catalytic domain;Leucine rich repeat 4	0.444058	0.949547	-5.2952	0.00032597	-2.01236	0.120697		b		b
BnaC06g32880D	General substrate transporter;Sucrose/H+ symporter, plant;Major facilitator superfamily domain, general substrate transporter	-0.206763	0.982334	-1.3513	0.0722111	-2.2133	6.37778e-05			c	c
BnaA05g18750D	Protein of unknown function DUF3537	-0.461543	0.875051	0.740755	0.524047	2.44189	0.000466518			c	c
BnaA06g09880D	ABC transporter-like;AAA+ ATPase domain;ABC-2 type transporter;Plant PDR ABC transporter associated	-0.282547	0.977283	-5.28181	0.0146558	-3.06533	0.0660816		b		b
BnaC05g10610D	Protein kinase, catalytic domain;Serine-threonine/tyrosine-protein kinase catalytic domain;Serine/threonine- / dual specificity protein kinase, catalytic domain;Serine/threonine-protein kinase, active site;Protein kinase-like domain;Protein kinase, ATP binding site;Tyrosine-protein kinase, catalytic domain	-0.518877	0.792891	-2.46908	0.0124831	-1.87527	0.0357651		b	c	bc
BnaA05g08640D	Glycoside hydrolase, family 19, catalytic;Chitin-binding, type 1;Glycoside hydrolase, family 19;Chitin-binding, type 1, conserved site;Lysozyme-like domain	-1.86773	0.787689	-5.56207	0.004285	-4.54249	0.0169651		b	c	bc
BnaC03g46230D	Cellular retinaldehyde binding/alpha-tocopherol transport;CRAL-TRIO domain;CRAL/TRIO, N-terminal domain	-0.580059	0.794596	-1.73064	0.00266716	-1.42942	0.00741881		b	c	bc
BnaC03g29810D	Domain of unknown function DUF221	-0.201119	0.927259	0.67853	0.0987078	1.16827	0.000462105			c	c
BnaA09g14320D	Toll/interleukin-1 receptor homology (TIR) domain;Disease resistance protein;NB-ARC;AAA+ ATPase domain;Leucine-rich repeat 3	-0.695742	0.885172	-2.47427	0.0146013	-0.844336	0.274541		b		b
BnaA06g26760D	Phosphatidylinositol 3-/4-kinase, catalytic domain;Ubiquitin;Protein kinase-like domain;Ubiquitin supergroup	0.00108514	1	-1.2293	0.0176736	-0.657437	0.213846		b		b
BnaC06g19690D	Protein kinase, catalytic domain;Serine/threonine- / dual specificity protein kinase, catalytic domain;Serine/threonine-protein kinase, active site;Protein kinase-like domain;Concanavalin A-like lectin/glucanase, subgroup;Wall-associated kinase;Tyrosine-protein kinase, catalytic domain	-0.524104	0.930012	-5.5756	0.000437856	-3.67159	0.00697094		b	c	bc
BnaAnng00630D	Heavy metal-associated domain, HMA	-0.369899	0.889166	-1.40062	0.0517933	-2.09546	0.000864076			c	c
BnaA06g39340D	BURP domain	0.358436	0.811673	0.582074	0.357312	1.32916	0.00275492			c	c
BnaA06g13780D	Carbohydrate kinase PfkB	-0.020897	0.995148	1.0152	0.00278765	0.498944	0.168006		b		b
BnaA10g08320D	Calcium-binding EF-hand;EF-hand-like domain;EF-Hand 1, calcium-binding site	1.46915	0.274391	0.494342	0.51147	1.16034	0.0193816			c	c
BnaC03g30940D	Protein kinase, catalytic domain;Legume lectin domain;Serine/threonine- / dual specificity protein kinase, catalytic domain;Serine/threonine-protein kinase, active site;Concanavalin A-like lectin/glucanases superfamily;Protein kinase-like domain;Concanavalin A-like lectin/glucanase, subgroup;Tyrosine-protein kinase, catalytic domain	-0.618525	0.556583	-2.23756	0.00305526	-1.08508	0.158335		b		b
BnaC09g52180D	no data	0.281046	0.83361	-0.740211	0.388705	-1.6042	0.0106565			c	c
BnaCnng05190D	Dormancyauxin associated	1.5412	0.094577	2.02735	5.11816e-05	-0.352224	0.578121		b		b
BnaCnng76920D	no data	0.535626	0.681366	1.72468	0.0161385	1.19702	0.0920027		b		b
BnaAnng25090D	Short-chain dehydrogenase/reductase SDR;Glucose/ribitol dehydrogenase;NAD(P)-binding domain	-0.0836727	0.964265	0.424506	0.480138	1.10277	0.00509478			c	c
BnaC09g23880D	Protein kinase, catalytic domain;Serine-threonine/tyrosine-protein kinase catalytic domain;Serine/threonine- / dual specificity protein kinase, catalytic domain;Gnk2-homologous domain;Serine/threonine-protein kinase, active site;Protein kinase-like domain;Concanavalin A-like lectin/glucanase, subgroup;Protein kinase, ATP binding site;Tyrosine-protein kinase, catalytic domain	-0.81911	0.871988	-3.58668	6.09561e-05	-2.00504	0.0100835		b	c	bc
BnaA01g37170D	Prenylated rab acceptor PRA1	-0.115652	0.995562	-4.79148	1.42373e-08	-2.3558	0.000188074		b	c	bc
BnaC05g30290D	Ovarian tumour, otubain	0.0111604	1	0.868508	0.139685	1.11453	0.00627552			c	c
BnaA03g53450D	Protein kinase, catalytic domain;Serine-threonine/tyrosine-protein kinase catalytic domain;Serine/threonine- / dual specificity protein kinase, catalytic domain;Protein kinase-like domain;Concanavalin A-like lectin/glucanase, subgroup;Protein kinase, ATP binding site;Tyrosine-protein kinase, catalytic domain	-0.628001	0.867076	-5.58301	0.0131141	-2.94622	0.105345		b		b
BnaA06g17110D	Armadillo;U box domain;Armadillo-like helical;Zinc finger, RING/FYVE/PHD-type;Armadillo-type fold	-0.157227	0.979221	-1.26144	0.0272077	-0.139219	0.846643		b		b
BnaA07g13180D	Cysteine peptidase, cysteine active site;Peptidase C1A, papain C-terminal;Peptidase C1A, papain;Proteinase inhibitor I29, cathepsin propeptide;Cysteine peptidase, histidine active site;Cysteine peptidase, asparagine active site	-0.132997	1	-7.26552	6.64424e-05	-2.92398	0.0122587		b	c	bc
BnaA02g03580D	Zinc finger, RING-type;Cellulose synthase;Zinc finger, RING/FYVE/PHD-type	0.102741	0.977526	0.162766	0.879237	-1.32803	0.0159384			c	c
BnaC01g09940D	no data	-0.129429	0.987259	-4.48361	0.00751829	-1.65347	0.31239		b		b
BnaC04g22860D	Protein kinase, catalytic domain;Legume lectin domain;Serine/threonine- / dual specificity protein kinase, catalytic domain;Serine/threonine-protein kinase, active site;Concanavalin A-like lectin/glucanases superfamily;Protein kinase-like domain;Concanavalin A-like lectin/glucanase, subgroup;Protein kinase, ATP binding site;Tyrosine-protein kinase, catalytic domain	-2.02255	0.777102	-3.6108	0.00100873	-3.7777	0.00011995		b	c	bc
BnaA07g02870D	Peptide methionine sulphoxide reductase MrsB	0.0273671	1	-1.13787	0.0431134	-0.348993	0.5782		b		b
BnaA06g11320D	no data	-3.40846	0.339078	0.521277	0.829594	2.60445	0.0168882			c	c
BnaA04g11180D	Toll/interleukin-1 receptor homology (TIR) domain;Disease resistance protein;Leucine-rich repeat;NB-ARC;Leucine-rich repeat 3	-0.353341	0.872717	-1.50406	0.027458	-0.568561	0.427539		b		b
BnaA06g25210D	Cytochrome P450;Cytochrome P450, E-class, group I;Cytochrome P450, conserved site	0.842772	0.093475	1.57298	0.000108161	0.494536	0.290603		b		b
BnaA07g06420D	Amine oxidase;Mycolic acid cyclopropane synthase	-0.535515	0.448306	-1.8091	0.00363725	-1.675	0.00513513		b	c	bc
BnaA06g32320D	no data	-0.0738717	0.989915	1.26277	0.0310206	1.9502	7.22358e-05		b	c	bc
BnaAnng28220D	Calmodulin binding protein-like	0.0372972	1	-3.13868	0.00821579	-0.620092	0.623831		b		b
BnaA08g25990D	Domain of unknown function DUF221	-1.02543	0.625094	0.424882	0.617301	1.03688	0.049132			c	c
BnaC03g09490D	Peptidase A1;Aspartic peptidase	0.34612	0.791506	2.12463	0.000428619	2.3602	2.53531e-05		b	c	bc
BnaC08g42140D	Sugar/inositol transporter;General substrate transporter;Sugar transporter, conserved site;Major facilitator superfamily domain, general substrate transporter;Major facilitator superfamily domain	-0.20561	0.923186	-1.53167	0.0213431	-1.9872	0.000689482		b	c	bc
BnaC05g31250D	Inorganic polyphosphate/ATP-NAD kinase, predicted;ATP-NAD kinase-like domain;ATP-NAD kinase, PpnK-type, all-beta;Inorganic polyphosphate/ATP-NAD kinase, domain 1	-0.649832	0.794606	-1.25273	0.0104382	-0.476825	0.359022		b		b
BnaC06g07650D	Leucine-rich repeat	-0.497732	0.901113	-0.685031	0.40444	-1.29783	0.0243648			c	c
BnaA07g28430D	Protein of unknown function DUF569;Actin cross-linking	-0.145015	0.983503	-2.89369	0.000154887	-1.82038	0.00954518		b	c	bc
BnaAnng31730D	no data	-0.385778	0.665975	-1.39958	0.0450647	-1.01837	0.123789		b		b
BnaA08g10060D	Alpha crystallin/Hsp20 domain;HSP20-like chaperone	-4.98611	0.0298137	-4.28238	0.00114297	-2.57383	0.00140777	a	b	c	abc
BnaC02g22230D	Protein kinase, catalytic domain;Serine/threonine- / dual specificity protein kinase, catalytic domain;Serine/threonine-protein kinase, active site;Protein kinase-like domain;Protein kinase, ATP binding site;Tyrosine-protein kinase, catalytic domain	0.077864	0.986332	-2.51359	0.000375564	-0.81109	0.283339		b		b
BnaC02g35960D	Cytochrome P450;Cytochrome P450, E-class, group I;Cytochrome P450, conserved site	-0.136724	0.972227	-2.80033	0.000166217	-1.93566	0.00618649		b	c	bc
BnaC09g49920D	AP2/ERF domain;DNA-binding, integrase-type	3.06373	0.120358	1.44964	0.0870845	2.13628	0.00186568			c	c
BnaCnng64120D	Leucine-rich repeat;Leucine-rich repeat, typical subtype	-0.614213	0.909833	-2.39845	0.00302647	0.190002	0.849411		b		b
BnaA05g24030D	no data	-2.05117	0.675109	-6.2652	7.34033e-06	-2.11072	0.0332117		b	c	bc
BnaC01g11550D	Carotenoid oxygenase	0.982435	0.0312837	1.60754	0.00853715	2.5336	4.27648e-06	a	b	c	abc
BnaC04g31930D	Glycosyl transferase, family 14	-0.439117	0.747328	-0.647507	0.291168	-1.16701	0.00944259			c	c
BnaC04g50490D	Remorin, C-terminal;Remorin, N-terminal	-0.142138	0.973383	0.401515	0.537729	1.44202	0.000295574			c	c
BnaA07g13310D	C1-like	-0.544805	0.898454	-4.13561	4.98243e-06	-2.49232	0.00216873		b	c	bc
BnaCnng09670D	AMP-dependent synthetase/ligase;AMP-binding, conserved site;Domain of unknown function DUF4009	-0.819384	0.389604	-1.60663	0.0040593	-0.141218	0.854687		b		b
BnaA01g20950D	Phytosulfokine	0.343558	0.853506	-2.70281	0.0179812	-2.79685	0.00463835		b	c	bc
BnaA08g11770D	Protein kinase, catalytic domain;Leucine-rich repeat;Serine/threonine- / dual specificity protein kinase, catalytic domain;Serine/threonine-protein kinase, active site;Protein kinase-like domain;Leucine-rich repeat-containing N-terminal, type 2;Protein kinase, ATP binding site;Tyrosine-protein kinase, catalytic domain	-0.568654	0.488864	-1.40284	0.0185341	-1.09567	0.0529234		b		b
BnaA06g31440D	AAA+ ATPase domain;ATPase, AAA-type, core;AAA-type ATPase, N-terminal domain	0.80861	0.252312	-2.12575	0.0215657	-0.575669	0.564413		b		b
BnaA01g30210D	Zinc finger, RING-type;S-ribonuclease binding protein, SBP1, pollen	-0.36924	0.704007	-1.43961	0.045148	-0.821819	0.262873		b		b
BnaA06g29080D	Protein of unknown function DUF868, plant	-0.173533	0.87085	-0.69427	0.145661	-1.11792	0.00442533			c	c
BnaA06g40690D	Protein kinase, catalytic domain;Serine-threonine/tyrosine-protein kinase catalytic domain;Leucine-rich repeat;Serine/threonine- / dual specificity protein kinase, catalytic domain;Protein kinase-like domain;Concanavalin A-like lectin/glucanase, subgroup;Tyrosine-protein kinase, catalytic domain	-0.87169	0.612273	-2.55764	0.00257422	-1.08986	0.216819		b		b
BnaCnng12130D	no data	0.0949658	0.995814	-3.9881	0.00476936	-2.17994	0.0699561		b		b
BnaC09g02680D	Glycoside hydrolase, family 3, N-terminal;Glycoside hydrolase family 3 C-terminal domain;Glycoside hydrolase, superfamily;Fibronectin type III-like domain;Glycoside hydrolase family 3	0.202563	0.957307	-0.645847	0.807119	-3.28589	0.0401242			c	c
BnaA08g14100D	Domain of unknown function DUF3700	1.76768	0.0221264	2.26836	2.34842e-06	0.508772	0.378098	a	b		ab
BnaA10g16290D	Glycoside hydrolase, family 14;Glycoside hydrolase, catalytic domain;Glycoside hydrolase, superfamily	-0.267525	0.826012	-1.18538	0.00505374	-0.912427	0.0292841		b	c	bc
BnaC08g38450D	Protein kinase, catalytic domain;Serine-threonine/tyrosine-protein kinase catalytic domain;EGF-like calcium-binding;Serine/threonine- / dual specificity protein kinase, catalytic domain;Serine/threonine-protein kinase, active site;Protein kinase-like domain;Wall-associated kinase;EGF-like calcium-binding, conserved site;Tyrosine-protein kinase, catalytic domain	-1.17991	0.786478	-3.85925	4.49935e-06	-2.25107	0.00151442		b	c	bc
BnaAnng30640D	Cation-transporting P-type ATPase;P-type ATPase, A domain;P-type ATPase, phosphorylation site;HAD-like domain;P-type ATPase, cytoplasmic domain N;Cation-transporting P-type ATPase, subfamily IB;Divalent cations-transporting P-type ATPase	0.204669	0.934204	-2.00759	0.000923661	-1.0504	0.0834488		b		b
BnaC01g41000D	no data	-0.186241	0.933379	0.770639	0.231638	1.04329	0.0451559			c	c
BnaA08g13020D	Glutamine amidotransferase type 1	-0.964164	0.601173	-2.28317	0.0130383	-1.53101	0.0752055		b		b
BnaCnng04920D	Zinc finger, RING-type;Zinc finger, RING/FYVE/PHD-type	-0.883685	0.286937	-0.513461	0.81835	2.25641	0.0390968			c	c
BnaA02g05600D	No apical meristem (NAM) protein	0.205541	0.976037	-2.88375	0.00226252	-2.35429	0.00658928		b	c	bc
BnaC05g39130D	Disease resistance protein;Leucine-rich repeat;NB-ARC;Leucine-rich repeat, typical subtype;Leucine rich repeat 4	0.33618	0.913549	-1.81593	0.0326662	-1.60178	0.0351311		b	c	bc
BnaA05g23530D	Peptidase T2, asparaginase 2	-1.63385	0.0259821	-2.97946	1.79574e-06	-3.31872	6.69563e-09	a	b	c	abc
BnaC04g49870D	AP2/ERF domain;DNA-binding, integrase-type	2.86993	0.0427997	0.786271	0.677456	1.23962	0.328744	a			a
BnaC02g47790D	F-box domain, cyclin-like;Phloem protein 2-like	-0.16286	0.987492	0.511324	0.706678	1.99108	0.00275773			c	c
BnaC09g35510D	Zinc finger, Dof-type	0.708641	0.031401	0.747565	0.293747	0.586429	0.350464	a			a
BnaAnng06350D	Transferase;Chloramphenicol acetyltransferase-like domain	-0.31105	0.777669	0.0602159	0.961707	1.12295	0.0357024			c	c
BnaA10g24820D	Anthranilate synthase component I, PabB-like;ADC synthase;Anthranilate synthase component I, N-terminal;Chorismate binding, C-terminal;Anthranilate synthase component I	0.343969	0.771511	0.155634	0.906498	1.31288	0.0302965			c	c
BnaA07g16880D	Alcohol dehydrogenase superfamily, zinc-type;Alcohol dehydrogenase, C-terminal;NAD(P)-binding domain;Polyketide synthase, enoylreductase	0.731666	0.122405	1.41259	6.74998e-06	0.454274	0.197817		b		b
BnaC07g06930D	Senescence/spartin-associated	-0.864007	0.76574	0.432757	0.50587	0.918341	0.016775			c	c
BnaC01g32580D	MATH;TRAF-like	-0.955417	0.469727	1.3425	0.106644	2.58352	6.96351e-05			c	c
BnaC09g04840D	Alpha/beta hydrolase fold-3	-0.280466	0.95841	0.743259	0.294627	1.17404	0.0010403			c	c
BnaA03g46280D	DNA-binding WRKY	0.0664761	0.997402	-3.08714	0.000460137	-1.28681	0.119948		b		b
BnaA03g14520D	no data	-0.192812	1	-3.95975	0.00737627	-2.47312	0.0370855		b	c	bc
BnaC04g50460D	Eukaryotic phosphomannomutase;HAD-superfamily hydrolase, subfamily IIB;HAD-like domain	-0.289456	0.894122	-2.00335	0.000676016	-0.436735	0.539159		b		b
BnaC08g29760D	Rad21/Rec8-like protein, C-terminal, eukaryotic;Rad21/Rec8-like protein, N-terminal;Rad21/Rec8-like protein, C-terminal	0.0930695	0.969858	-0.335051	0.848739	-2.04421	0.0377984			c	c
BnaC09g03150D	Zinc finger, RING-type;Zinc finger, RING/FYVE/PHD-type	1.12366	0.0471484	-0.75761	0.0515423	-1.24045	0.00017611	a		c	ac
BnaCnng57420D	Glutaredoxin;Glutaredoxin-like, plant II;Thioredoxin-like fold	-0.552114	0.328395	-1.26282	0.0312772	-1.59748	0.00208327		b	c	bc
BnaA01g03580D	Disease resistance protein;NB-ARC;Powdery mildew resistance protein, RPW8 domain	0.125589	0.975396	0.324091	0.690206	2.5232	4.35155e-09			c	c
BnaC06g20260D	Terpene synthase, conserved site;Terpenoid cyclases/protein prenyltransferase alpha-alpha toroid;Squalene cyclase	0.165383	0.914413	1.10297	0.0433665	1.66949	0.000366744		b	c	bc
BnaA03g20780D	DC1	-0.977792	0.712969	-5.14656	0.00313933	-4.53872	0.00167367		b	c	bc
BnaC06g19560D	DNA-binding WRKY	0.598804	0.94547	1.37382	0.232393	1.93812	0.0206696			c	c
BnaC06g25020D	Glutathione S-transferase, N-terminal;Glutathione S-transferase, C-terminal;Glutathione S-transferase, C-terminal-like;Thioredoxin-like fold;Glutathione S-transferase/chloride channel, C-terminal	-2.77883	0.661594	-9.62655	2.12048e-07	-4.09312	0.000545968		b	c	bc
BnaA08g10600D	Protein kinase, catalytic domain;Serine-threonine/tyrosine-protein kinase catalytic domain;Serine/threonine- / dual specificity protein kinase, catalytic domain;Gnk2-homologous domain;Serine/threonine-protein kinase, active site;Protein kinase-like domain;Concanavalin A-like lectin/glucanase, subgroup;Protein kinase, ATP binding site;Tyrosine-protein kinase, catalytic domain	-1.68758	0.724431	-10.8006	3.73967e-05	-8.04181	0.00014031		b	c	bc
BnaA02g27550D	Cation-transporting P-type ATPase;Phospholipid-transporting P-type ATPase, subfamily IV;P-type ATPase, A domain;P-type ATPase, phosphorylation site;HAD-like domain;P-type ATPase, cytoplasmic domain N	-0.0163792	1	-2.57291	0.0205175	-1.59534	0.106426		b		b
BnaC04g03180D	TPMT family	-0.594606	0.29061	0.623953	0.583026	2.30822	0.000499392			c	c
BnaC05g42780D	Aromatic amino acid lyase;Phenylalanine ammonia-lyase;L-Aspartase-like;Phenylalanine/histidine ammonia-lyases, active site;Phenylalanine ammonia-lyase, shielding domain;Fumarase/histidase, N-terminal	0.105319	0.956959	0.279533	0.83652	1.52079	0.0240543			c	c
BnaA07g09780D	no data	0.3662	0.965891	-2.35232	0.00513376	-2.58835	0.00028233		b	c	bc
BnaA03g02640D	No apical meristem (NAM) protein	0.347302	0.935045	-1.45891	0.0118348	-0.127048	0.87349		b		b
BnaAnng20840D	Legume lectin domain;Concanavalin A-like lectin/glucanases superfamily;Concanavalin A-like lectin/glucanase, subgroup	-1.96094	0.782699	-3.88244	0.0021654	-3.1296	0.000470221		b	c	bc
BnaC04g28210D	U box domain;Armadillo-like helical;Zinc finger, RING/FYVE/PHD-type;Armadillo-type fold	-0.479083	0.954298	-1.52965	0.0750237	-1.43486	0.017892			c	c
BnaC01g00170D	Cysteine peptidase, cysteine active site;Peptidase C1A, papain C-terminal;Peptidase C1A, papain	0.603589	0.327139	-0.341732	0.725103	-1.18094	0.0272481			c	c
BnaAnng07150D	no data	0.210244	0.865972	-1.94501	0.01633	-1.4893	0.050605		b		b
BnaAnng35580D	RNA recognition motif domain;Nucleotide-binding, alpha-beta plait	0.319731	0.778404	1.00625	0.0239117	0.849883	0.0443156		b	c	bc
BnaCnng06000D	Armadillo-like helical;Armadillo-type fold	-0.183908	1	-5.39205	0.000214025	-2.01405	0.0802606		b		b
BnaC06g34110D	Pleckstrin homology domain;Pleckstrin homology-like domain;Domain of unknown function DUF2404	-0.0867177	0.978137	-0.0246314	0.980781	0.782348	0.0370788			c	c
BnaA09g34080D	Methyltransferase type 11	0.330064	0.965102	-5.5711	0.00254038	-2.66292	0.0760843		b		b
BnaA02g36790D	Aluminum-activated malate transporter	-0.142485	0.939384	1.1402	0.0719047	1.94426	0.000378049			c	c
BnaC07g30390D	no data	-0.453798	0.96842	-2.3144	0.000341246	-1.05053	0.0474241		b	c	bc
BnaC03g32440D	Drug/metabolite transporter;Tpt phosphate/phosphoenolpyruvate translocator;Domain of unknown function DUF250	-0.278286	0.722954	-0.98622	0.00024038	-0.62306	0.024599		b	c	bc
BnaA10g15830D	Protein phosphatase 2C, manganese/magnesium aspartate binding site;Forkhead-associated (FHA) domain;Protein phosphatase 2C (PP2C)-like;SMAD/FHA domain;Protein phosphatase 2C	0.124401	0.922763	0.409418	0.302839	0.634038	0.0351063			c	c
BnaA03g51890D	no data	0.338451	0.681946	0.378867	0.386974	0.68229	0.0260342			c	c
BnaA09g13770D	Protein kinase, catalytic domain;Serine-threonine/tyrosine-protein kinase catalytic domain;Bulb-type lectin domain;Serine/threonine- / dual specificity protein kinase, catalytic domain;Apple-like;Serine/threonine-protein kinase, active site;Protein kinase-like domain;PAN-2 domain;Concanavalin A-like lectin/glucanase, subgroup;Tyrosine-protein kinase, catalytic domain;S-locus receptor kinase, C-te…	-3.70205	0.378204	-4.90769	5.64055e-05	-3.77728	5.76692e-05		b	c	bc
BnaA02g07000D	UDP-glucuronosyl/UDP-glucosyltransferase	0.683453	0.474508	0.635716	0.328661	1.79141	8.19506e-05			c	c
BnaC03g70320D	Plant disease resistance response protein	0.00666887	1	-0.789888	0.282218	-1.48225	0.00799227			c	c
BnaA08g05680D	Domain of unknown function DUF221	-0.859706	0.00624398	-0.806202	0.0545729	-0.592907	0.128828	a			a
BnaC03g33150D	Protein-tyrosine/Dual specificity phosphatase;Protein-tyrosine phosphatase, SIW14-like;Protein-tyrosine phosphatase, active site;Protein-tyrosine phosphatase, dual specificity phosphatase, eukaryotic	-1.01612	0.299658	-2.87198	0.00763447	-3.11404	0.00108467		b	c	bc
BnaA05g08070D	no data	0.408447	0.943562	0.353432	0.742595	1.58224	0.00302115			c	c
BnaC03g33270D	no data	-1.34712	0.793544	-10.9599	2.18302e-05	-6.08321	0.00292505		b	c	bc
BnaA09g31620D	Disease resistance protein;NB-ARC;AAA+ ATPase domain;ATPase, AAA-type, core;ATPase, AAA-type, conserved site;AAA-type ATPase, N-terminal domain	-0.0634598	0.991815	-1.18566	0.0495604	-0.47744	0.447481		b		b
BnaC01g42250D	SAM dependent carboxyl methyltransferase	-0.517601	0.845551	1.14118	0.420971	2.12304	0.0297178			c	c
BnaC02g46260D	RNA helicase, ATP-dependent, DEAD-box, conserved site;DNA/RNA helicase, DEAD/DEAH box type, N-terminal;Helicase, superfamily 1/2, ATP-binding domain;RNA helicase, DEAD-box type, Q motif;Protein of unknown function DUF3511	-0.387276	0.632433	-0.228791	0.850811	-1.8395	0.00251056			c	c
BnaC04g28190D	Late embryogenesis abundant protein, LEA-14	0.138751	0.960883	0.5671	0.294053	1.03824	0.0098766			c	c
BnaC03g55330D	Protein kinase, catalytic domain;Legume lectin domain;Serine/threonine- / dual specificity protein kinase, catalytic domain;Serine/threonine-protein kinase, active site;Concanavalin A-like lectin/glucanase, subgroup;Protein kinase, ATP binding site;Tyrosine-protein kinase, catalytic domain	-0.528461	0.877174	-2.04857	0.0815837	-3.42426	0.000385792			c	c
BnaA06g38450D	VQ	-0.671499	0.87703	-2.10979	0.00905559	-2.46265	0.000441031		b	c	bc
BnaA01g22550D	Nucleic acid-binding, OB-fold;Replication factor A, C-terminal	-3.85704	0.000317529	0.23406	0.952834	0.479006	0.835962	a			a
BnaA05g27680D	Prenylated rab acceptor PRA1	-0.372596	0.834776	0.121937	0.873635	0.727805	0.0422273			c	c
BnaA05g27280D	Target SNARE coiled-coil domain;Syntaxin, N-terminal;Syntaxin/epimorphin, conserved site;t-SNARE	-0.268823	0.962613	-2.77923	0.00154044	-1.6988	0.039068		b	c	bc
BnaCnng04150D	Protein kinase, catalytic domain;S-locus glycoprotein;Serine-threonine/tyrosine-protein kinase catalytic domain;Bulb-type lectin domain;Serine/threonine- / dual specificity protein kinase, catalytic domain;Apple-like;Serine/threonine-protein kinase, active site;Protein kinase-like domain;PAN-2 domain;Concanavalin A-like lectin/glucanase, subgroup;Protein kinase, ATP binding site;Tyrosine-protein …	-0.104593	0.989973	-2.08069	0.00255331	-1.65789	0.00955393		b	c	bc
BnaC06g42530D	Mitochondrial brown fat uncoupling protein;Mitochondrial substrate/solute carrier;Mitochondrial carrier domain	0.154821	0.93066	-0.389275	0.73551	-1.62275	0.0206216			c	c
BnaC06g36030D	NmrA-like;NAD(P)-binding domain	-0.453624	0.908649	-3.45487	0.00345911	-1.28071	0.249811		b		b
BnaA01g01870D	Protein kinase, catalytic domain;Serine-threonine/tyrosine-protein kinase catalytic domain;Serine/threonine- / dual specificity protein kinase, catalytic domain;Serine/threonine-protein kinase, active site;Protein kinase-like domain;Concanavalin A-like lectin/glucanase, subgroup;Protein kinase, ATP binding site;Tyrosine-protein kinase, catalytic domain	-1.36957	0.307867	-1.66421	0.0416632	-0.949872	0.213863		b		b
BnaA01g19270D	START domain;START-like domain	-0.0261392	1	1.49311	0.0374298	1.79048	0.00420711		b	c	bc
BnaCnng38850D	no data	-0.0866157	0.986049	-2.73727	0.00748931	-2.54714	0.00799464		b	c	bc
BnaA06g30250D	Leucine-rich repeat-containing N-terminal, type 2	0.469576	0.753308	-1.66453	0.0182945	-1.2729	0.0533097		b		b
BnaC03g58590D	Membrane attack complex component/perforin (MACPF) domain	-0.980882	0.683674	-1.9327	0.0213647	-0.432337	0.646017		b		b
BnaA09g27350D	Dormancyauxin associated	1.0172	0.0814844	1.3399	0.00338471	0.383314	0.480181		b		b
BnaAnng34660D	no data	0.655075	0.0385282	-0.811495	0.0220584	0.127581	0.784578	a	b		ab
BnaCnng60710D	No apical meristem (NAM) protein	-1.42868	0.78413	-4.02253	0.00347411	-2.0572	0.0848082		b		b
BnaC07g15230D	no data	-0.890914	0.827342	0.865947	0.437016	1.51928	0.0326764			c	c
BnaCnng18270D	Heavy metal-associated domain, HMA	0.065657	1	-2.93555	0.000798083	-1.13948	0.172662		b		b
BnaC03g73280D	no data	1.20956	0.000181704	1.45635	0.000211246	0.503141	0.258545	a	b		ab
BnaA10g12930D	Signal transduction response regulator, receiver domain;CCT domain;CheY-like superfamily	0.732124	0.131729	0.80444	0.0339968	0.360525	0.376351		b		b
BnaC03g16980D	KIP1-like	-0.431395	0.868958	1.50373	0.0553197	1.49465	0.0332891			c	c
BnaA02g05340D	FAD linked oxidase, N-terminal;Cytokinin dehydrogenase 1, FAD/cytokinin binding domain;FAD-linked oxidase-like, C-terminal;FAD-binding, type 2;FAD-binding, type 2, subdomain 1;CO dehydrogenase flavoprotein-like, FAD-binding, subdomain 2;Vanillyl-alcohol oxidase/Cytokinin dehydrogenase C-terminal domain	0.605956	0.187638	0.485513	0.385739	1.51977	4.84932e-05			c	c
BnaA05g05930D	Protein kinase, catalytic domain;Serine-threonine/tyrosine-protein kinase catalytic domain;Serine/threonine- / dual specificity protein kinase, catalytic domain;Serine/threonine-protein kinase, active site;Protein kinase-like domain;Concanavalin A-like lectin/glucanase, subgroup;Protein kinase, ATP binding site;Tyrosine-protein kinase, catalytic domain	-2.19534	0.397852	-2.45526	0.00299292	-1.86477	0.00563475		b	c	bc
BnaA04g21040D	Late embryogenesis abundant protein, LEA-14	1.73953	0.79051	-5.31948	0.00305526	-3.04924	0.0358535		b	c	bc
BnaC01g05180D	no data	1.43391	0.643171	-2.63855	0.1071	-2.98486	0.013912			c	c
BnaA06g30060D	Zinc finger, RING-type;Zinc finger, RING/FYVE/PHD-type;Zinc finger, RING-type, conserved site	0.337791	0.896252	0.429417	0.594671	1.05939	0.035075			c	c
BnaC07g37460D	Cytochrome P450;Cytochrome P450, E-class, group I;Cytochrome P450, conserved site	-0.129725	1	-7.95247	0.00060319	-7.43878	0.00029912		b	c	bc
BnaA10g17910D	Glutamine synthetase, catalytic domain;Glutamine synthetase, beta-Grasp;Glutamine synthetase/guanido kinase, catalytic domain;Glutamine synthetase, N-terminal conserved site;Glutamine synthetase, glycine-rich site	-0.612634	0.738399	-1.95398	0.00491437	-1.42428	0.038389		b	c	bc
BnaA03g27030D	C2 calcium-dependent membrane targeting;C2 calcium/lipid-binding domain, CaLB;Phosphoribosyltransferase C-terminal;C2 membrane targeting protein	1.66998	0.779354	-5.51425	0.0135448	-2.39438	0.169116		b		b
BnaC05g17520D	F-box domain, cyclin-like	0.798549	0.608168	0.733269	0.402907	1.29361	0.0388858			c	c
BnaC02g34090D	NUDIX hydrolase domain;NUDIX hydrolase domain-like;NUDIX hydrolase, conserved site	-0.060978	0.982157	-1.31011	0.0268863	0.0274616	0.97458		b		b
BnaA03g31730D	SAM dependent carboxyl methyltransferase	-0.193541	0.947251	-0.211172	0.889051	2.3649	0.000297074			c	c
BnaC01g17810D	Aldose 1-/Glucose-6-phosphate 1-epimerase;Galactose mutarotase-like domain;Glycoside hydrolase-type carbohydrate-binding, subgroup	0.369195	0.873998	-2.02595	0.0246005	-0.815658	0.367905		b		b
BnaA10g11590D	Xylose isomerase;Xylose isomerase-like, TIM barrel domain;Xylose isomerase, bacterial-type	0.558911	0.216364	1.49431	0.00015472	0.671743	0.115777		b		b
BnaA10g09730D	no data	-0.352761	0.569608	-1.41674	0.0191225	0.0156848	0.985472		b		b
BnaA02g03980D	no data	-0.806292	0.77006	-3.39798	0.00934425	-0.807806	0.566956		b		b
BnaC05g03040D	Oxoglutarate/iron-dependent dioxygenase;Non-haem dioxygenase N-terminal domain	0.351825	0.729414	-0.0264012	0.982657	1.00574	0.0230829			c	c
BnaA01g32040D	Protein kinase, catalytic domain;Serine/threonine- / dual specificity protein kinase, catalytic domain;Protein kinase-like domain;Concanavalin A-like lectin/glucanase, subgroup;Protein kinase, ATP binding site;Tyrosine-protein kinase, catalytic domain	0.0542858	0.995982	-1.86751	0.0384664	-0.76997	0.383745		b		b
BnaC03g34270D	Rapid ALkalinization Factor	-0.25806	0.914413	0.52035	0.39234	1.05263	0.0138019			c	c
BnaC04g46310D	Alpha/beta hydrolase fold-1;Alpha/beta hydrolase, N-terminal	0.755793	0.794606	0.0265965	0.988602	2.30528	0.000389542			c	c
BnaC04g40000D	NAD-dependent epimerase/dehydratase;NAD(P)-binding domain	0.0698101	0.982214	-0.283748	0.708459	-1.02713	0.0347277			c	c
BnaC02g45580D	no data	0.209109	0.858291	0.447577	0.313503	0.667924	0.049014			c	c
BnaC04g05720D	Peptidase A1;Peptidase aspartic, active site;Aspartic peptidase	-0.897384	0.880652	-7.18661	0.000798083	-4.99345	0.00438096		b	c	bc
BnaA02g22480D	Phytochelatin synthase;Phytochelatin synthase, C-terminal	-0.478035	0.860065	-3.67254	0.00241096	-4.21781	9.47178e-05		b	c	bc
BnaA02g17480D	Thaumatin;Thaumatin, conserved site	0.457664	0.697392	1.27911	0.019232	0.919687	0.0828757		b		b
BnaA09g21840D	Protein BYPASS-related	0.184395	0.929405	-0.998678	0.0327388	-0.888725	0.0359491		b	c	bc
BnaC03g73620D	ABC transporter, transmembrane domain;ABC transporter-like;AAA+ ATPase domain;ABC transporter, transmembrane domain, type 1;ABC transporter, integral membrane type 1	-0.764432	0.337777	-4.17721	0.000261002	-4.8317	3.69226e-06		b	c	bc
BnaAnng18430D	no data	1.40182	0.708952	2.80407	0.0256061	3.98237	0.000254358		b	c	bc
BnaA03g32270D	Glycoside hydrolase, family 19, catalytic;Glycoside hydrolase, family 19;Lysozyme-like domain	-0.909532	0.142537	0.694312	0.617216	3.06426	0.000130579			c	c
BnaC03g37650D	Sulphate anion transporter;STAS domain;Sulphate transporter;Sulphate anion transporter, conserved site	-0.0313981	0.997629	-0.204967	0.914577	1.74509	0.0422218			c	c
BnaC07g45940D	Armadillo;Armadillo-like helical;Armadillo-type fold	0.503576	0.850465	-1.23753	0.0278184	-0.811862	0.139984		b		b
BnaA06g17230D	Pectinesterase inhibitor	-0.151297	0.971439	-1.05812	0.00198316	-0.357762	0.351857		b		b
BnaA07g25750D	RNA recognition motif domain;Nucleotide-binding, alpha-beta plait;Friend of PRMT1 duplication	-0.449407	0.460526	-0.850758	0.0109464	-0.180711	0.66827		b		b
BnaC09g14870D	Toll/interleukin-1 receptor homology (TIR) domain;Disease resistance protein;NB-ARC;AAA+ ATPase domain;Leucine-rich repeat 3	-0.0324046	1	-3.91027	0.0171202	-2.27659	0.0295419		b	c	bc
BnaA10g25550D	Disease resistance protein;Leucine-rich repeat;NB-ARC;Powdery mildew resistance protein, RPW8 domain	-0.214376	0.896483	-2.14108	0.00173089	-0.668928	0.382264		b		b
BnaC04g32300D	Leucine-rich repeat	-0.997356	0.566146	-4.06999	5.05702e-05	-2.21827	0.0132882		b	c	bc
BnaA10g22680D	No apical meristem (NAM) protein	0.526749	0.923856	-3.28672	0.000361951	-0.535572	0.612008		b		b
BnaC03g48520D	Zinc finger, C2H2;Zinc finger, C2H2-like	-4.01832	0.262738	-6.77116	0.000105172	-2.52828	0.0636941		b		b
BnaC06g05350D	t-SNARE	-0.0338952	0.995355	0.517203	0.808563	2.3845	0.0407458			c	c
BnaC09g20450D	Phox/Bem1p	-0.307226	0.708286	-0.648379	0.0764693	-0.688309	0.0321669			c	c
BnaA05g09830D	Dormancyauxin associated	1.55593	0.094577	2.14028	5.81499e-05	-0.231625	0.748658		b		b
BnaC04g46050D	Phosphate permease;General substrate transporter;Major facilitator superfamily domain, general substrate transporter;Major facilitator superfamily domain	-0.356752	0.924449	-4.29818	0.00779688	-4.07175	0.00362449		b	c	bc
BnaA03g07140D	Glycosyl transferase, family 8	-0.00255685	1	-2.5869	0.00834792	-1.59807	0.0835343		b		b
BnaA07g23190D	CRAL-TRIO domain;GOLD;CRAL/TRIO, N-terminal domain	0.274697	0.85189	-0.258247	0.858138	-2.02774	0.00988124			c	c
BnaA09g08940D	No apical meristem (NAM) protein	-0.579418	0.852663	-2.42822	0.0386493	-1.94312	0.0488544		b	c	bc
BnaA06g37500D	t-SNARE	-0.126537	0.957307	0.792343	0.635111	2.53737	0.0141551			c	c
BnaA06g02200D	no data	0.631013	0.591102	1.74891	0.0318226	2.43695	0.00040513		b	c	bc
BnaC05g14600D	Protein kinase, catalytic domain;Calcium-binding EF-hand;Serine/threonine- / dual specificity protein kinase, catalytic domain;Serine/threonine-protein kinase, active site;Protein kinase-like domain;EF-hand-like domain;Protein kinase, ATP binding site;EF-Hand 1, calcium-binding site;Tyrosine-protein kinase, catalytic domain	-0.426888	0.747328	-1.84404	0.000992484	-1.1439	0.0358748		b	c	bc
BnaC03g08310D	SANT/Myb domain;Myb domain, plants;Homeodomain-like;Myb domain	-0.176622	0.895466	-0.997208	0.0853268	-1.50218	0.00218882			c	c
BnaCnng18670D	EGF-like calcium-binding;Protease-associated domain, PA;Complement Clr-like EGF domain	0.818369	0.452756	-4.20944	0.00218599	-1.97616	0.115824		b		b
BnaC08g22920D	Plant lipid transfer protein/Par allergen;Bifunctional inhibitor/plant lipid transfer protein/seed storage helical domain	-0.332821	0.789604	0.373461	0.573269	-0.91157	0.0304587			c	c
BnaC08g27590D	VQ	0.671042	0.584079	-1.34116	0.00679565	-1.04144	0.0315333		b	c	bc
BnaA02g04780D	Raffinose synthase;Aldolase-type TIM barrel;Glycoside hydrolase, superfamily	-0.708682	0.779354	-1.81327	0.0395876	-1.50181	0.0669141		b		b
BnaA05g06310D	no data	0.676361	0.925337	-2.76614	0.000332573	-2.024	0.00165808		b	c	bc
BnaA03g36540D	C2 calcium-dependent membrane targeting;Leucine-rich repeat;Phospholipase D/Transphosphatidylase;Leucine-rich repeat, typical subtype;C2 calcium/lipid-binding domain, CaLB;Leucine-rich repeat-containing N-terminal, type 2;Phospholipase D family;C2 membrane targeting protein;Phospholipase D, C-terminal;Leucine rich repeat 4	-0.384122	0.918968	-4.55499	0.00012809	-3.91917	0.000319721		b	c	bc
BnaC05g50000D	HAD-superfamily hydrolase, subfamily IB, PSPase-like;Pyridoxal phosphate phosphatase-related;Phosphatase PHOSPHO-type;HAD-like domain	-0.39115	0.954298	-1.70343	0.0284866	1.27189	0.0598768		b		b
BnaC09g28950D	AAA+ ATPase domain;ATPase, AAA-type, core;ATPase, AAA-type, conserved site	-0.671912	0.414718	-1.55349	0.0352881	-1.27347	0.0938161		b		b
BnaA03g12860D	Multi antimicrobial extrusion protein	-1.14879	0.903754	-2.26892	0.00174279	-0.609218	0.342092		b		b
BnaC03g08950D	COG complex component, COG2;Conserved oligomeric Golgi complex, subunit 2, N-terminal;COG complex component, COG2, C-terminal	-0.783656	0.617098	-1.38848	0.0152346	-1.57408	0.00302115		b	c	bc
BnaA04g22820D	Bacterial transferase hexapeptide repeat;Nucleotidyl transferase;Trimeric LpxA-like	-0.259773	0.839632	0.129189	0.884059	1.40359	0.000267042			c	c
BnaA02g31700D	no data	1.5689	0.488864	0.433853	0.743924	1.89382	0.00102276			c	c
BnaA06g22090D	Galectin, carbohydrate recognition domain;Glycosyl transferase, family 31;Concanavalin A-like lectin/glucanases superfamily;Concanavalin A-like lectin/glucanase, subgroup	-0.0465667	0.995355	-2.22486	0.00595896	-0.582449	0.518121		b		b
BnaC06g15240D	Transferase;Chloramphenicol acetyltransferase-like domain	-0.234082	0.864555	0.404692	0.767727	1.9088	0.00754616			c	c
BnaC03g74010D	NAD-dependent epimerase/dehydratase;Nucleotide sugar epimerase;NAD(P)-binding domain	-0.263104	0.814787	-0.554064	0.143077	-0.832342	0.00788885			c	c
BnaC09g07000D	Protein kinase, catalytic domain;Serine-threonine/tyrosine-protein kinase catalytic domain;Serine/threonine- / dual specificity protein kinase, catalytic domain;U box domain;Protein kinase-like domain;Zinc finger, RING/FYVE/PHD-type;Tyrosine-protein kinase, catalytic domain	-0.690598	0.691232	-2.51642	0.0115363	-1.4617	0.125517		b		b
BnaA01g26690D	no data	-0.423546	0.894432	0.00967809	0.994367	1.482	0.000825006			c	c
BnaA10g16440D	Vacuolar protein sorting-associated protein 62	-0.251462	0.880979	-1.21129	0.00207441	-0.531186	0.216912		b		b
BnaC09g31740D	Glycoside hydrolase, family 17;X8;Glycoside hydrolase, catalytic domain;Glycoside hydrolase, superfamily	-0.442129	0.908649	-0.925924	0.084871	-1.23391	0.00382371			c	c
BnaC01g18190D	Zinc finger, GATA-type;Zinc finger, NHR/GATA-type	-1.23393	0.00026664	-1.5111	0.1631	-0.632105	0.570952	a			a
BnaA02g34260D	no data	0.292543	0.758908	0.323715	0.666206	1.06898	0.0117696			c	c
BnaA03g31790D	B3 DNA binding domain;DNA-binding pseudobarrel domain	-0.444491	0.840655	1.65704	0.00839026	-0.271703	0.733112		b		b
BnaC02g10170D	no data	-0.455663	0.71352	-0.352179	0.736017	-1.65704	0.002043			c	c
BnaC07g47150D	Cytochrome P450;Cytochrome P450, E-class, group I;Cytochrome P450, conserved site	-2.20208	0.682244	-0.263261	0.931994	3.5389	0.00563185			c	c
BnaA09g30450D	Gibberellin regulated protein	-2.26831	1.96849e-06	-2.73567	2.67577e-08	-4.68918	5.66453e-21	a	b	c	abc
BnaC04g50970D	Homeodomain;Leucine zipper, homeobox-associated;Homeodomain-like;Homeobox, conserved site	0.283174	0.968385	2.345	0.08077	2.23196	0.0436371			c	c
BnaC04g09830D	no data	-0.742196	0.716228	0.337378	0.857116	1.8423	0.0312216			c	c
BnaC07g46660D	Cation-transporting P-type ATPase;Cation-transporting P-type ATPase, N-terminal;Cation-transporting P-type ATPase, C-terminal;Calcium-transporting P-type ATPase, subfamily IIB;P-type ATPase, A domain;P-type ATPase, phosphorylation site;HAD-like domain;P-type ATPase, transmembrane domain;P-type ATPase, cytoplasmic domain N;Calcium-transporting P-type ATPase, N-terminal autoinhibitory domain	-0.0973049	0.951031	-1.38965	0.00404013	-1.18513	0.0117144		b	c	bc
BnaC08g18640D	Tify;CO/COL/TOC1, conserved site	-0.693477	0.839571	-1.28076	0.0425447	-0.623333	0.333514		b		b
BnaA05g19250D	Sugar/inositol transporter;General substrate transporter;Sugar transporter, conserved site;Major facilitator superfamily domain, general substrate transporter;Major facilitator superfamily domain	-0.131768	0.968926	-2.0606	0.020176	-1.84906	0.0222698		b	c	bc
BnaC05g21780D	Dormancyauxin associated	0.825652	0.416985	1.52997	0.0115519	0.238711	0.757304		b		b
BnaA03g06490D	SANT/Myb domain;Myb domain, plants;Homeodomain-like;Myb domain	-0.897814	0.0587204	-1.22777	0.0144898	-1.2227	0.00565223		b	c	bc
BnaC03g34490D	Sugar/inositol transporter;General substrate transporter;Sugar transporter, conserved site;Major facilitator superfamily domain, general substrate transporter;Major facilitator superfamily domain	0.166242	0.902585	-2.032	0.00773564	-1.81884	0.0103149		b	c	bc
BnaA02g26980D	Protein of unknown function DUF4228	0.0168068	0.997402	-0.0814655	0.937408	-1.04054	0.013912			c	c
BnaA07g38460D	Terpene synthase, conserved site;Terpenoid cyclases/protein prenyltransferase alpha-alpha toroid;Squalene cyclase	0.173736	0.921852	0.903811	0.154923	1.79061	0.000220004			c	c
BnaA01g28810D	Legume lectin domain;Concanavalin A-like lectin/glucanases superfamily;Concanavalin A-like lectin/glucanase, subgroup;Lectin	-0.540832	0.634303	-2.10779	0.000474198	-2.43224	1.45456e-05		b	c	bc
BnaC03g39980D	Protein kinase, catalytic domain;Serine-threonine/tyrosine-protein kinase catalytic domain;Serine/threonine- / dual specificity protein kinase, catalytic domain;Protein kinase-like domain;Protein kinase, ATP binding site;Tyrosine-protein kinase, catalytic domain	-0.141427	0.976046	-4.05228	0.000270662	-2.67848	0.00681642		b	c	bc
BnaC01g17840D	ENTH/VHS;AP180 N-terminal homology (ANTH) domain;Epsin-like, N-terminal;Clathrin adaptor, phosphoinositide-binding, GAT-like	1.40396	0.6884	-4.03488	0.00318591	-3.31761	0.00607266		b	c	bc
BnaA09g44360D	no data	2.381	0.702444	-2.02426	0.083393	-1.9417	0.0355371			c	c
BnaC03g38360D	DnaJ domain	0.307477	0.660729	0.747363	0.0798732	1.2363	0.000601476			c	c
BnaA02g23670D	Protein kinase, catalytic domain;Leucine-rich repeat;Serine/threonine- / dual specificity protein kinase, catalytic domain;Leucine-rich repeat, typical subtype;Serine/threonine-protein kinase, active site;Protein kinase-like domain;Leucine-rich repeat-containing N-terminal, type 2;Protein kinase, ATP binding site;Tyrosine-protein kinase, catalytic domain	-1.92575	0.521371	-4.28198	0.0062638	-5.34956	0.000175785		b	c	bc
BnaCnng47740D	Glutathione S-transferase, N-terminal;Glutathione S-transferase, C-terminal;Glutathione S-transferase, C-terminal-like;Thioredoxin-like fold;Glutathione S-transferase/chloride channel, C-terminal	-0.405207	0.93601	-7.59031	3.1629e-05	-4.70551	0.00224936		b	c	bc
BnaA01g23000D	no data	-0.350683	0.822166	-0.125903	0.899036	-1.28919	0.000645138			c	c
BnaA01g09890D	no data	0.247287	0.801952	1.30466	0.0031399	0.778801	0.087428		b		b
BnaA03g16830D	UDP-glucuronosyl/UDP-glucosyltransferase	0.614922	0.905341	-1.90724	0.0346727	-2.60156	0.00043252		b	c	bc
BnaC05g06510D	Phosphoglycerate/bisphosphoglycerate mutase, active site;Histidine phosphatase superfamily, clade-1	-0.797153	0.640661	-0.821994	0.169784	-1.35321	0.00481998			c	c
BnaC01g09700D	Lipase, GDSL;SGNH hydrolase-type esterase domain	-0.738259	0.205827	-1.60729	0.0076762	-1.74682	0.00273872		b	c	bc
BnaC02g42690D	Diacylglycerol kinase, accessory domain;Diacylglycerol kinase, catalytic domain;Protein kinase C-like, phorbol ester/diacylglycerol binding	-0.637604	0.447651	-1.46018	0.0334849	0.150294	0.869668		b		b
BnaA01g36880D	VQ	0.482246	0.938066	-1.0713	0.174026	-1.06329	0.0260365			c	c
BnaA07g11050D	Domain of unknown function DUF125, transmembrane	-0.469768	0.934926	-3.06709	0.000966632	-5.43471	8.66382e-09		b	c	bc
BnaC06g36880D	Dehydrin	-0.0477412	0.991972	0.511688	0.43587	1.03228	0.0239518			c	c
BnaAnng30480D	no data	-1.53952	0.70386	-1.79424	0.0475235	-1.51071	0.0437976		b	c	bc
BnaC02g41390D	Aromatic-ring hydroxylase-like;Squalene epoxidase	-4.12613	0.182165	-7.87066	6.40428e-05	-5.79382	0.000385266		b	c	bc
BnaC01g18640D	Fructose-bisphosphate aldolase, class-I;Uridine kinase;Phosphoribulokinase/uridine kinase;Aldolase-type TIM barrel	0.696734	0.215105	1.19612	0.207305	1.77007	0.0210735			c	c
BnaA02g10980D	CAP160	0.934502	0.871055	3.07498	0.215333	3.70087	0.03278			c	c
BnaA09g19550D	Allene oxide cyclase	-3.93432	0.0388429	filtre	filtre	filtre	filtre	a			a
BnaA09g42610D	no data	-0.773229	0.819792	-0.744643	0.264777	-1.15272	0.0122676			c	c
BnaC02g47920D	Expansin;Expansin/pollen allergen, DPBB domain;Expansin, cellulose-binding-like domain;Expansin/Lol pI;Barwin-related endoglucanase;Barwin-like endoglucanase	0.14059	0.956612	0.820253	0.252656	1.27768	0.0231632			c	c
BnaC01g06660D	DNA-binding WRKY	-0.691729	0.74696	-3.38172	0.00110335	-1.40581	0.147891		b		b
BnaA03g37550D	no data	0.28891	0.912561	-3.42439	0.000354503	-2.26873	0.0126113		b	c	bc
BnaC03g18700D	Domain of unknown function DUF23	-0.400982	0.854744	0.430442	0.655296	1.26851	0.0255022			c	c
BnaAnng33690D	no data	-1.09224	0.780169	1.48129	0.16871	2.08291	0.00124028			c	c
BnaC05g13310D	VQ	-0.855628	0.825472	-3.71365	0.000552675	-3.04576	0.000327191		b	c	bc
BnaA06g11310D	no data	-0.102974	0.988535	0.560889	0.326789	1.06994	0.00374023			c	c
BnaC02g41040D	Beta-lactamase-related;UbiB domain;Lipopolysaccharide core heptose(II) kinase;Protein kinase-like domain;Beta-lactamase/transpeptidase-like	-0.753511	0.142336	-1.92958	0.00491924	-1.2179	0.0703042		b		b
BnaC03g28080D	Selenoprotein SelK/SelG	0.46481	0.627734	0.381447	0.538545	1.19326	0.00185995			c	c
BnaA01g26300D	no data	1.0563	0.436898	1.16941	0.427437	4.8381	8.39378e-07			c	c
BnaC03g52080D	Heat shock factor (HSF)-type, DNA-binding;Winged helix-turn-helix transcription repressor DNA-binding domain	2.12724	0.000846203	1.51327	0.0131253	1.68183	0.00274083	a	b	c	abc
BnaCnng22570D	NAD-dependent epimerase/dehydratase;UDP-glucose 4-epimerase;NAD(P)-binding domain;UDP-glucose 4-epimerase C-terminal domain	-0.643587	0.773195	0.802296	0.318029	1.32973	0.0278989			c	c
BnaA03g40550D	Protein kinase, catalytic domain;Serine-threonine/tyrosine-protein kinase catalytic domain;Leucine-rich repeat;Serine/threonine- / dual specificity protein kinase, catalytic domain;Leucine-rich repeat, typical subtype;Serine/threonine-protein kinase, active site;Protein kinase-like domain;Leucine-rich repeat-containing N-terminal, type 2;Tyrosine-protein kinase, catalytic domain;Leucine rich repe…	0.663344	0.258786	1.66841	0.000479159	0.809809	0.117367		b		b
BnaC06g25830D	Very-long-chain 3-ketoacyl-CoA synthase;FAE1/Type III polyketide synthase-like protein;3-Oxoacyl-[acyl-carrier-protein (ACP)] synthase III C-terminal;Thiolase-like, subgroup;Thiolase-like	-0.333889	0.779354	0.528637	0.393819	1.98197	9.50922e-07			c	c
BnaAnng15300D	AIG2-like;Butirosin biosynthesis, BtrG-like	-0.318264	0.868453	-0.490399	0.60989	-1.43746	0.0121454			c	c
BnaC05g11100D	LURP1-like domain;Tubby C-terminal-like domain	-0.358847	0.887073	-0.385353	0.54927	-0.783204	0.0427169			c	c
BnaA01g09900D	Carotenoid oxygenase	0.810332	0.0695261	1.45185	0.0181363	1.5117	0.00687664		b	c	bc
BnaA06g37060D	Leucine carboxyl methyltransferase;S-adenosyl-L-methionine-dependent methyltransferase, putative	-0.984395	0.0760944	-1.1766	0.00137745	-0.978059	0.00717114		b	c	bc
BnaAnng02520D	Zinc finger, RING-type;Zinc finger, RING/FYVE/PHD-type	-0.0296379	1	-3.07112	0.00226279	-2.22898	0.0122676		b	c	bc
BnaA04g03830D	ABC transporter-like;AAA+ ATPase domain;ABC-2 type transporter;ABC transporter, conserved site	-0.352373	0.898075	-1.31091	0.0463293	-1.53111	0.00774378		b	c	bc
BnaAnng02190D	Transmembrane protein 135	0.674368	0.340291	1.60973	0.000160365	1.34098	0.00131664		b	c	bc
BnaC02g09360D	no data	-0.110688	0.973058	-1.76629	0.0279237	-0.428617	0.648067		b		b
BnaC08g13910D	Protein kinase, catalytic domain;Leucine-rich repeat;Serine/threonine- / dual specificity protein kinase, catalytic domain;Leucine-rich repeat, typical subtype;Serine/threonine-protein kinase, active site;Protein kinase-like domain;Leucine-rich repeat-containing N-terminal, type 2;Protein kinase, ATP binding site;Tyrosine-protein kinase, catalytic domain	-1.00018	0.706318	-2.95078	0.0406741	-1.43264	0.244102		b		b
BnaC06g34510D	no data	0.306788	0.791847	0.176295	0.814108	0.857471	0.0309951			c	c
BnaC05g37810D	Regulator of chromosome condensation, RCC1;Regulator of chromosome condensation 1/beta-lactamase-inhibitor protein II	-0.632288	0.0898349	-1.16117	0.000743377	-0.375766	0.348512		b		b
BnaA02g10970D	no data	-0.776674	0.763954	0.309423	0.636164	1.05873	0.00529491			c	c
BnaC03g74340D	Glycine rich protein	-1.24365	0.81779	-1.21965	0.379008	3.74959	5.10303e-05			c	c
BnaC01g16280D	Nucleoside phosphorylase domain;Nucleoside phosphorylase	-0.251967	0.815222	-0.23942	0.783489	1.05902	0.0202415			c	c
BnaC02g05930D	no data	0.0790827	0.998846	2.03029	0.0822649	2.47978	0.00248544			c	c
BnaC02g37590D	SANT/Myb domain;Homeodomain-like;Myb domain	-0.813465	0.359951	-1.65905	0.000709945	-1.04529	0.0281903		b	c	bc
BnaA03g30440D	no data	1.70244	0.00119285	1.70027	5.90303e-05	1.04641	0.0147028	a	b	c	abc
BnaC08g25010D	Methyltransferase type 11	-0.100767	0.986008	-1.82675	0.0203897	-0.828091	0.298459		b		b
BnaA03g27100D	Lipase, class 3;Mono-/di-acylglycerol lipase, N-terminal	-0.259655	0.949091	0.305059	0.763755	1.31553	0.0122088			c	c
BnaA07g04380D	Protein kinase, catalytic domain;Serine-threonine/tyrosine-protein kinase catalytic domain;Serine/threonine- / dual specificity protein kinase, catalytic domain;Serine/threonine-protein kinase, active site;Protein kinase-like domain;Tyrosine-protein kinase, catalytic domain	-0.0444403	0.997365	-1.32755	0.0471036	-0.828148	0.188651		b		b
BnaA07g03370D	Sugar/inositol transporter;General substrate transporter;Sugar transporter, conserved site;Major facilitator superfamily domain, general substrate transporter;Major facilitator superfamily domain	-0.66402	0.26059	-1.17911	0.0135362	-0.606564	0.221763		b		b
BnaA10g27210D	Protein kinase, catalytic domain;Serine-threonine/tyrosine-protein kinase catalytic domain;Serine/threonine- / dual specificity protein kinase, catalytic domain;Serine/threonine-protein kinase, active site;Protein kinase-like domain;Protein kinase, ATP binding site;Tyrosine-protein kinase, catalytic domain	-0.377718	0.943061	-1.8387	0.0022019	-1.14625	0.0448953		b	c	bc
BnaA02g20640D	Glutathione S-transferase, N-terminal;Glutathione S-transferase, C-terminal;Glutathione S-transferase, C-terminal-like;Thioredoxin-like fold;Glutathione S-transferase/chloride channel, C-terminal	-0.469889	0.928084	-7.93314	1.88373e-05	-5.16108	0.00114403		b	c	bc
BnaC03g77460D	Glutamine amidotransferase type 1	-0.437303	0.864677	-2.39775	0.000357827	-1.50605	0.0199447		b	c	bc
BnaC04g26840D	Regulator of chromosome condensation, RCC1;Regulator of chromosome condensation 1/beta-lactamase-inhibitor protein II	0.71245	0.0348141	-0.275239	0.741303	2.33694	2.86938e-08	a		c	ac
BnaCnng20380D	Calcium-binding EF-hand;EF-hand-like domain;EF-Hand 1, calcium-binding site	-0.614585	0.718964	-1.04557	0.0453674	-0.531316	0.324862		b		b
BnaA09g08390D	Plant peroxidase;Haem peroxidase, plant/fungal/bacterial;Haem peroxidase;Peroxidases heam-ligand binding site	0.119758	0.955705	-0.0707164	0.94371	1.53729	4.44297e-05			c	c
BnaC08g49610D	Pyruvate phosphate dikinase, PEP/pyruvate-binding;ATP-grasp fold, subdomain 1;ATP-grasp fold, subdomain 2	0.689132	0.509079	1.13068	0.0124566	0.671664	0.141639		b		b
BnaC04g46140D	Nodulin-like;Major facilitator superfamily;Major facilitator superfamily domain, general substrate transporter	-0.833108	0.472964	-2.26535	5.8395e-05	-1.54711	0.00495714		b	c	bc
BnaCnng78530D	Pectinesterase inhibitor	-0.669174	0.496236	-0.27712	0.616267	-0.961396	0.00402085			c	c
BnaC02g17040D	Protein kinase, catalytic domain;Serine/threonine- / dual specificity protein kinase, catalytic domain;Serine/threonine-protein kinase, active site;Protein kinase-like domain;Concanavalin A-like lectin/glucanase, subgroup;Protein kinase, ATP binding site;Tyrosine-protein kinase, catalytic domain	-2.10141	0.0814844	-2.03269	0.0101481	-0.309506	0.74049		b		b
BnaA03g46490D	Alpha/beta hydrolase fold-1;Epoxide hydrolase-like	0.0297077	1	-2.97844	0.0165922	-1.28811	0.263913		b		b
BnaC09g03400D	Calmodulin binding protein-like	-0.619332	0.874386	-3.68748	0.000314663	-1.28021	0.205848		b		b
BnaA03g48570D	No apical meristem (NAM) protein	-0.407106	0.940641	-0.0314088	0.985618	1.49369	0.0140126			c	c
BnaC01g06420D	no data	1.27328	0.382091	0.657971	0.35554	1.06845	0.034101			c	c
BnaC06g16070D	VQ	2.67187	0.29542	-6.46659	0.00141245	-4.88441	0.00521393		b	c	bc
BnaA03g00790D	no data	0.165756	0.990601	2.21111	0.0650103	2.83536	0.00267297			c	c
BnaC08g48150D	Major facilitator superfamily;Major facilitator superfamily domain, general substrate transporter;Major facilitator superfamily domain	-0.442176	0.450438	-1.27896	0.000776798	-0.32757	0.473079		b		b
BnaCnng48490D	Galactose-binding domain-like;Rhamnogalacturonate lyase;Carbohydrate-binding-like fold;Carboxypeptidase, regulatory domain	-0.295889	0.869061	0.0319459	0.985087	1.37854	0.0270897			c	c
BnaC04g17540D	Transferase;Chloramphenicol acetyltransferase-like domain	0.0613215	0.995355	-3.63148	4.23586e-05	-1.34295	0.117789		b		b
BnaCnng64700D	Phosphatidate cytidylyltransferase	0.24326	0.793262	0.808632	0.168674	1.43605	0.00174869			c	c
BnaA10g28610D	Serpin family;Protease inhibitor I4, serpin, plant;Protease inhibitor I4, serpin, conserved site;Serpin domain	0.0735298	0.988643	0.402621	0.468451	1.22881	0.00055666			c	c
BnaA05g33290D	Armadillo-like helical;Armadillo-type fold	-0.151772	1	-3.61781	0.00408472	-2.18998	0.0200967		b	c	bc
BnaA02g33910D	No apical meristem (NAM) protein	0.898732	0.706731	-2.23259	0.00720159	-0.63154	0.494714		b		b
BnaA02g32320D	Beta-lactamase-related;UbiB domain;Lipopolysaccharide core heptose(II) kinase;Protein kinase-like domain;Beta-lactamase/transpeptidase-like	-0.885213	0.304178	-2.40596	0.00154044	-1.33935	0.0703709		b		b
BnaC02g41110D	Thaumatin;Thaumatin, conserved site	-0.0544685	0.990925	0.0353137	0.971377	1.29678	0.000184557			c	c
BnaC04g45550D	Sphingomyelin synthase-like domain	-0.288478	0.924491	-1.52747	0.0391707	-0.247276	0.779296		b		b
BnaC08g47610D	Domain of unknown function DUF4378	-0.541678	0.966387	-4.33204	0.000599679	-1.94036	0.0415699		b	c	bc
BnaA03g36450D	UDP-glucuronosyl/UDP-glucosyltransferase	-0.197898	0.948457	0.908327	0.326591	1.654	0.0127944			c	c
BnaCnng30110D	Oxoglutarate/iron-dependent dioxygenase;Prolyl 4-hydroxylase, alpha subunit	-0.0541426	0.989639	-1.33253	0.072622	-1.41786	0.0288846			c	c
BnaA05g05610D	Transferase;Chloramphenicol acetyltransferase-like domain	-0.221192	0.965077	-0.291922	0.81835	1.68245	0.00737705			c	c
BnaA02g22470D	Glycoside hydrolase, family 16;Glycoside hydrolase, family 16, active site;Beta-glucanase;Concanavalin A-like lectin/glucanases superfamily;Xyloglucan endo-transglycosylase, C-terminal;Concanavalin A-like lectin/glucanase, subgroup;Xyloglucan endotransglucosylase/hydrolase	-0.700906	0.88411	-1.2428	0.537331	-2.55864	0.0294869			c	c
BnaC03g77160D	Carboxyl transferase;Acetyl-coenzyme A carboxyltransferase, N-terminal;Acetyl-coenzyme A carboxyltransferase, C-terminal	0.55127	0.37248	1.04151	0.00179865	0.339478	0.387546		b		b
BnaA02g34440D	Band 7 protein	-3.62109	0.346398	-8.6357	3.06662e-06	-7.46127	4.40283e-06		b	c	bc
BnaA06g14170D	no data	1.28089	0.000972072	-0.664543	0.574489	-0.491599	0.588197	a			a
BnaAnng12080D	Domain of unknown function DUF250	-1.38587	0.875746	-2.83946	0.00105896	-2.31679	0.00170987		b	c	bc
BnaA01g00740D	Protein kinase, catalytic domain;Serine/threonine- / dual specificity protein kinase, catalytic domain;Serine/threonine-protein kinase, active site;Protein kinase-like domain;Protein kinase, ATP binding site;Tyrosine-protein kinase, catalytic domain	-0.0419781	1	1.4838	0.250438	2.44239	0.00779096			c	c
BnaA04g17700D	BTB/POZ-like;Coagulation factor 5/8 C-terminal type domain;Galactose-binding domain-like;BTB/POZ fold;BTB/Kelch-associated;BTB/POZ;Farnesoic acid O-methyl transferase	-0.161903	0.905544	1.26012	0.0162099	1.16848	0.0174702		b	c	bc
BnaC06g18530D	Basic-leucine zipper domain	0.496205	0.582985	0.168615	0.767548	0.661895	0.0295968			c	c
BnaC07g35520D	Heat shock factor (HSF)-type, DNA-binding;Winged helix-turn-helix transcription repressor DNA-binding domain	0.506421	0.863697	-1.63105	0.00359646	-0.210139	0.772399		b		b
BnaA01g08080D	Ribosomal protein S21e;Ribosomal protein S21e, conserved site	-0.108481	0.970595	0.487477	0.734306	-2.06562	0.0286424			c	c
BnaA09g31070D	RNA-binding, CRM domain	0.686563	0.0847032	1.49391	4.32811e-05	1.0648	0.00273356		b	c	bc
BnaC05g41850D	Prenylated rab acceptor PRA1	-0.344187	0.773528	0.0628365	0.94143	0.764954	0.0276239			c	c
BnaAnng01980D	DNA-binding WRKY	0.459715	0.768358	-3.34904	0.00192429	-3.76364	0.000121988		b	c	bc
BnaA06g24500D	Legume lectin domain;Concanavalin A-like lectin/glucanases superfamily;Concanavalin A-like lectin/glucanase, subgroup	-0.0963965	1	-3.59958	0.0014132	-2.59851	0.000102632		b	c	bc
BnaC06g34760D	Zinc finger, RING-type;Zinc finger, RING/FYVE/PHD-type;Transmembrane Fragile-X-F-associated protein	0.269096	0.812339	0.927742	0.0230627	0.505152	0.246279		b		b
BnaA03g42560D	Myc-type, basic helix-loop-helix (bHLH) domain;Transcription factor MYC/MYB N-terminal	0.323879	0.871821	0.774301	0.251285	1.15962	0.0285939			c	c
BnaC02g21850D	no data	0.205128	0.909838	1.29162	0.0227688	0.556552	0.32452		b		b
BnaA03g24080D	Protein kinase, catalytic domain;S-locus glycoprotein;Bulb-type lectin domain;Serine/threonine- / dual specificity protein kinase, catalytic domain;Serine/threonine-protein kinase, active site;Protein kinase-like domain;Concanavalin A-like lectin/glucanase, subgroup;Protein kinase, ATP binding site;Tyrosine-protein kinase, catalytic domain	0.017914	1	-1.78736	0.0018621	-0.271669	0.705178		b		b
BnaA06g27970D	Protein kinase, catalytic domain;Serine/threonine- / dual specificity protein kinase, catalytic domain;Leucine-rich repeat, typical subtype;Serine/threonine-protein kinase, active site;Protein kinase-like domain;Leucine-rich repeat-containing N-terminal, type 2;Protein kinase, ATP binding site;Tyrosine-protein kinase, catalytic domain;Leucine rich repeat 4	0.706075	0.872518	-3.03418	0.024006	-1.26397	0.303934		b		b
BnaA02g04800D	Glycosyl transferase, family 1;Sucrose-phosphate synthase;Sucrose phosphate synthase, plant;HAD-like domain	-0.814803	0.384801	-1.06411	0.0324527	-0.39384	0.469821		b		b
BnaC09g32870D	no data	0.7178	0.565495	0.856864	0.136911	0.96837	0.0391273			c	c
BnaA03g35400D	Aminotransferase, class IV;Branched-chain amino acid aminotransferase II	-2.89332	9.06973e-05	-1.33768	0.34104	-0.864761	0.483649	a			a
BnaA06g09770D	Erv1/Alr;Thioredoxin-like fold;Thioredoxin domain;ERV/ALR sulphydryl oxidase;Thioredoxin, conserved site	0.68508	0.236303	1.09308	0.00388429	0.339031	0.491382		b		b
BnaC07g38550D	DNA-binding WRKY	0.17334	0.985263	-2.55444	0.0266224	-1.81374	0.0654531		b		b
BnaC04g01070D	Basic-leucine zipper domain;G-box binding, MFMR	0.120631	0.9469	0.230621	0.843539	1.75991	0.00131567			c	c
BnaC05g10770D	Ankyrin repeat;Ankyrin repeat-containing domain;PGG domain	-0.0145557	1	0.319915	0.740719	1.67545	0.00104908			c	c
BnaAnng18140D	Toll/interleukin-1 receptor homology (TIR) domain;Disease resistance protein;Leucine-rich repeat;NB-ARC;Leucine-rich repeat, typical subtype	-0.395824	0.726676	-1.41071	0.0266083	-1.55674	0.00635969		b	c	bc
BnaA06g33060D	Cytochrome P450;Cytochrome P450, E-class, group I;Cytochrome P450, conserved site	-0.92785	0.109958	-1.85776	0.000154736	-1.15882	0.005623		b	c	bc
BnaC04g47970D	WD40 repeat;WD40/YVTN repeat-like-containing domain;WD40-repeat-containing domain	0.394934	0.765789	0.699009	0.287794	1.31775	0.010923			c	c
BnaA07g03570D	RNA recognition motif domain;Nucleotide-binding, alpha-beta plait	0.107614	0.983102	1.40796	0.0997501	3.0596	6.95466e-06			c	c
BnaA08g26300D	Germin;Cupin 1;RmlC-like cupin domain;RmlC-like jelly roll fold;Germin, manganese binding site	-0.416157	0.942773	-4.12727	0.000495314	-1.49732	0.181157		b		b
BnaA01g16340D	no data	0.347648	0.94821	-0.452313	0.739572	-2.88992	0.000129008			c	c
BnaC03g71830D	Translation initiation factor SUI1;Eukaryotic translation initiation factor SUI1	-0.0390221	0.994793	0.256334	0.729653	0.934688	0.0233116			c	c
BnaC06g35220D	Chaperonin ClpA/B;AAA+ ATPase domain;ATPase, AAA-type, core;Clp, N-terminal;ATPase, AAA-2;Chaperonin ClpA/B, conserved site;Clp ATPase, C-terminal;Double Clp-N motif	0.886794	0.260188	3.56599	7.52266e-08	6.16253	1.43909e-20		b	c	bc
BnaC06g30370D	SPX, N-terminal;EXS, C-terminal	0.247426	0.845061	-0.67845	0.398082	-2.27722	0.000126456			c	c
BnaC08g28530D	Remorin, C-terminal	0.875118	0.0502781	1.62368	0.00591003	2.57814	8.18276e-07		b	c	bc
BnaC07g28960D	Protein kinase, catalytic domain;Leucine-rich repeat;Serine/threonine- / dual specificity protein kinase, catalytic domain;Leucine-rich repeat, typical subtype;Protein kinase-like domain;Leucine-rich repeat-containing N-terminal, type 2;Protein kinase, ATP binding site;Tyrosine-protein kinase, catalytic domain;Leucine rich repeat 4	0.511	0.84725	-2.54739	0.00164371	-1.33929	0.0876565		b		b
BnaA07g28390D	Proton-dependent oligopeptide transporter family;Major facilitator superfamily domain, general substrate transporter	-0.965227	0.60042	-1.91342	0.0022391	-0.0447565	0.962669		b		b
BnaA10g15190D	Blue (type 1) copper domain;Plastocyanin-like;Cupredoxin	-0.614041	0.954298	2.14705	0.02273	2.34919	0.00244943		b	c	bc
BnaC07g03340D	no data	0.118559	0.970595	1.51219	0.00370846	1.43286	0.00296711		b	c	bc
BnaA06g12090D	no data	0.612544	0.834355	4.99088	2.22698e-05	5.32016	4.68411e-07		b	c	bc
BnaA01g01600D	Haem peroxidase, plant/fungal/bacterial;Plant ascorbate peroxidase;Haem peroxidase;Peroxidases heam-ligand binding site;Peroxidase, active site	0.363237	0.776956	0.361244	0.529981	1.3107	0.000411659			c	c
BnaC07g17940D	FAD linked oxidase, N-terminal;Berberine/berberine-like;FAD-binding, type 2;FAD-binding, type 2, subdomain 1;CO dehydrogenase flavoprotein-like, FAD-binding, subdomain 2	-2.26148	0.491285	-5.80802	7.33099e-05	-2.89317	0.00599764		b	c	bc
BnaA03g00750D	no data	-0.595027	0.752596	-0.538281	0.612566	-3.26233	1.65634e-07			c	c
BnaA10g17370D	SANT/Myb domain;Myb domain, plants;Homeodomain-like;Myb domain	-0.761038	0.509079	-1.18892	0.0112864	-0.749172	0.116648		b		b
BnaA01g31630D	Globin;Leghaemoglobin;Globin-like;Globin, structural domain	-0.712562	0.0760944	-1.04774	0.0305754	-2.14451	4.00755e-07		b	c	bc
BnaC08g13000D	no data	0.521211	0.952312	-3.63205	0.00457443	-2.95212	0.0100776		b	c	bc
BnaC07g28420D	Calmodulin binding protein-like	-0.730614	0.864041	-4.6701	0.000379358	-1.44855	0.241373		b		b
BnaC06g05340D	Glycoside hydrolase, family 1;Glycoside hydrolase, catalytic domain;Glycoside hydrolase, superfamily;Glycoside hydrolase, family 1, active site	0.27631	0.905544	0.883216	0.689209	3.06521	0.0220978			c	c
BnaC03g52370D	Autophagy-related protein 13	0.255533	0.885873	-0.337873	0.535405	0.782099	0.0253927			c	c
BnaC04g51120D	TspO/MBR-related protein	2.04663	0.407956	3.61636	0.0075412	5.79536	6.42048e-07		b	c	bc
BnaC09g23720D	C2 calcium-dependent membrane targeting;Phospholipase D/Transphosphatidylase;C2 calcium/lipid-binding domain, CaLB;Phospholipase D family;C2 membrane targeting protein	-0.210434	0.897296	-1.38179	0.035471	-1.13829	0.0655771		b		b
BnaCnng37790D	AP2/ERF domain;B3 DNA binding domain;DNA-binding pseudobarrel domain;DNA-binding, integrase-type	-0.254568	0.849771	-0.774526	0.0222703	0.0889201	0.847382		b		b
BnaA01g19180D	Leucine-rich repeat;Leucine-rich repeat, typical subtype;Leucine-rich repeat-containing N-terminal, type 2	-0.919232	0.792271	-3.31796	0.00140439	-2.56789	0.0029717		b	c	bc
BnaC05g50350D	Cellular retinaldehyde binding/alpha-tocopherol transport;CRAL-TRIO domain;CRAL/TRIO, N-terminal domain	-1.358	0.173882	-1.20106	0.169732	-1.57043	0.0297322			c	c
BnaC05g18130D	Galactose-binding domain-like;Sad1/UNC-like, C-terminal	-0.128246	0.975673	0.0646375	0.958502	0.995671	0.0463642			c	c
BnaAnng31840D	Protein kinase, catalytic domain;Serine/threonine- / dual specificity protein kinase, catalytic domain;Protein kinase-like domain;Protein kinase, ATP binding site;Tyrosine-protein kinase, catalytic domain	0.109928	0.98782	-3.15027	0.00308446	-3.5431	0.000192065		b	c	bc
BnaC08g39230D	NUDIX hydrolase domain;NUDIX hydrolase domain-like;NUDIX hydrolase, conserved site	-1.19989	0.833556	-0.606987	0.616379	2.17595	0.000129008			c	c
BnaA09g12330D	no data	-0.606636	0.569858	-2.85226	0.00554772	-2.05924	0.0308413		b	c	bc
BnaA03g50050D	Glycoside hydrolase, family 16;Glycoside hydrolase, family 16, active site;Concanavalin A-like lectin/glucanases superfamily;Xyloglucan endo-transglycosylase, C-terminal;Concanavalin A-like lectin/glucanase, subgroup;Xyloglucan endotransglucosylase/hydrolase	0.202583	0.975461	-2.76138	0.00351267	-1.96075	0.0295839		b	c	bc
BnaA09g45360D	Uncharacterised protein family Cys-rich	-0.295081	0.951189	-4.50748	0.000367401	-2.00086	0.0948417		b		b
BnaC09g04740D	WD40 repeat;WD40/YVTN repeat-like-containing domain	-1.04006	0.0795097	-1.8587	0.00758744	-0.267658	0.758282		b		b
BnaA07g30460D	CCAAT-binding transcription factor, subunit B;CCAAT-binding factor, conserved site	0.0918593	0.982334	1.33813	0.0191434	0.95532	0.0499653		b	c	bc
BnaAnng16530D	no data	1.38035	0.281717	4.49003	4.85849e-12	5.0663	3.29188e-16		b	c	bc
BnaCnng45600D	Alcohol dehydrogenase superfamily, zinc-type;Alcohol dehydrogenase, zinc-type, conserved site;GroES-like;Alcohol dehydrogenase, C-terminal;Alcohol dehydrogenase GroES-like;NAD(P)-binding domain	-1.3841	0.0198748	-4.13778	6.33554e-08	-3.47666	5.40184e-07	a	b	c	abc
BnaC05g36410D	Universal stress protein A;UspA;Rossmann-like alpha/beta/alpha sandwich fold	0.027408	0.989973	1.06157	0.00449679	0.526766	0.184046		b		b
BnaC09g12760D	Toll/interleukin-1 receptor homology (TIR) domain;Disease resistance protein;NB-ARC	-0.498271	0.302352	-1.07855	0.0123313	-0.986502	0.0158308		b	c	bc
BnaC01g24230D	Tetraspanin;Tetraspanin/Peripherin	0.812366	0.0449045	0.832462	0.303974	1.10233	0.0822414	a			a
BnaC05g44370D	Cytochrome b561, eukaryote;DOMON domain;Cytochrome b561/ferric reductase transmembrane	0.454966	0.845279	0.0709507	0.965455	-1.63076	0.0487914			c	c
BnaA02g05760D	F-box domain, cyclin-like;FBD	-0.944893	0.512438	-2.5974	0.00178792	-1.94338	0.0109596		b	c	bc
BnaA01g25950D	Protein of unknown function DUF1005	0.125389	0.981239	0.238287	0.811785	1.16329	0.021416			c	c
BnaA01g18450D	PEP-utilising enzyme, C-terminal;Pyruvate phosphate dikinase, PEP/pyruvate-binding;PEP-utilising enzyme, mobile domain;Pyruvate, phosphate dikinase;ATP-grasp fold, subdomain 1;ATP-grasp fold, subdomain 2;Pyruvate/Phosphoenolpyruvate kinase;PEP-utilising enzyme, active site;PEP-utilising enzyme, conserved site	-0.954661	0.274391	-1.91045	0.00137831	-0.46342	0.520053		b		b
BnaC09g22680D	Senescence regulator	0.0553792	0.998061	2.3299	0.0845771	2.51009	0.0266086			c	c
BnaA03g42110D	Monooxygenase, FAD-binding;Aromatic-ring hydroxylase-like	-0.251502	0.964389	-3.32763	3.17083e-05	-2.43391	0.00075298		b	c	bc
BnaA10g22530D	Phosphate-induced protein 1	-0.64325	0.717783	-1.00557	0.2274	-2.60368	3.98975e-05			c	c
BnaC02g40780D	no data	0.0424705	0.986521	0.941513	0.035705	1.45089	0.000174266		b	c	bc
BnaA03g17380D	Protein kinase, catalytic domain;Legume lectin domain;Serine/threonine- / dual specificity protein kinase, catalytic domain;Serine/threonine-protein kinase, active site;Concanavalin A-like lectin/glucanases superfamily;Protein kinase-like domain;Concanavalin A-like lectin/glucanase, subgroup;Tyrosine-protein kinase, catalytic domain	-0.318808	0.798725	-2.0771	0.000264279	-1.02085	0.0802029		b		b
BnaC06g06950D	CCAAT-binding transcription factor, subunit B;CCAAT-binding factor, conserved site	0.0692498	0.985432	1.6048	0.00152958	1.20032	0.00708796		b	c	bc
BnaA03g45500D	no data	-1.94529	0.789604	-1.94173	0.248583	-1.41832	0.0409016			c	c
BnaA01g15080D	Aldose 1-/Glucose-6-phosphate 1-epimerase;Galactose mutarotase-like domain;Glycoside hydrolase-type carbohydrate-binding, subgroup	0.053926	0.99666	-1.67138	0.0167325	-1.63953	0.00896322		b	c	bc
BnaA02g27980D	Thiazole biosynthetic enzyme Thi4 family	-0.0647671	0.975294	0.697561	0.326664	1.37498	0.00756656			c	c
BnaC09g50130D	Protein of unknown function DUF3133	-0.732545	0.888981	-3.13484	0.00884263	-2.26729	0.0233243		b	c	bc
BnaA01g33720D	Leucine-rich repeat;Leucine-rich repeat 3	0.286351	0.93951	-1.89779	0.0124222	-0.922122	0.228065		b		b
BnaA10g24160D	Protein of unknown function DUF761, plant	-1.03434	0.0322817	-1.57108	0.0038943	-0.0792276	0.922532	a	b		ab
BnaA10g18940D	Myc-type, basic helix-loop-helix (bHLH) domain	-0.63109	0.472164	-0.708543	0.376145	-1.6424	0.0083859			c	c
BnaAnng20820D	Pectinesterase, catalytic;Pectinesterase inhibitor;Pectin lyase fold/virulence factor;Pectin lyase fold;Pectinesterase, active site	-0.488478	0.864781	-2.97258	0.00106833	-1.87872	0.0285014		b	c	bc
BnaC07g35250D	FMN-dependent dehydrogenase;FMN-dependent alpha-hydroxy acid dehydrogenase, active site;Alpha-hydroxy acid dehydrogenase, FMN-dependent;Aldolase-type TIM barrel	0.36718	0.914413	-2.45788	0.0231413	-1.6775	0.0928485		b		b
BnaA06g16150D	Plant peroxidase;Haem peroxidase, plant/fungal/bacterial;Haem peroxidase;Peroxidases heam-ligand binding site;Peroxidase, active site	0.0405842	0.986885	-1.49649	0.0954788	-1.5454	0.0456145			c	c
BnaCnng04240D	Mlo-related protein	-0.959831	0.796619	-4.10998	0.00164916	-2.74201	0.0133619		b	c	bc
BnaC05g50980D	Zinc finger, Dof-type	-1.39372	0.00073271	-1.93238	1.4525e-05	-2.33162	2.00765e-08	a	b	c	abc
BnaC05g21170D	no data	-1.29036	0.399889	-2.69162	0.00185293	-1.07871	0.234713		b		b
BnaC04g45720D	Calcium/proton exchanger;Calcium/proton exchanger CAX;Sodium/calcium exchanger membrane region	0.205105	0.921771	0.0805344	0.941184	1.41501	0.00113428			c	c
BnaC05g08640D	Protein kinase, catalytic domain;S-locus glycoprotein;Bulb-type lectin domain;Serine/threonine- / dual specificity protein kinase, catalytic domain;Apple-like;Serine/threonine-protein kinase, active site;Protein kinase-like domain;PAN-2 domain;Concanavalin A-like lectin/glucanase, subgroup;Tyrosine-protein kinase, catalytic domain	-0.443971	0.763062	-1.18458	0.0057547	-1.41365	0.00028758		b	c	bc
BnaCnng07470D	Cation-transporting P-type ATPase;Cation-transporting P-type ATPase, N-terminal;Cation-transporting P-type ATPase, C-terminal;Calcium-transporting P-type ATPase, subfamily IIB;P-type ATPase, A domain;P-type ATPase, phosphorylation site;HAD-like domain;P-type ATPase, transmembrane domain;P-type ATPase, cytoplasmic domain N;Calcium-transporting P-type ATPase, N-terminal autoinhibitory domain	-0.63172	0.3467	-1.26326	0.030313	-0.635391	0.293207		b		b
BnaA09g25390D	Transcription factor, MADS-box;Transcription factor, K-box	0.412539	0.792142	1.7303	0.0166281	1.87792	0.00417756		b	c	bc
BnaC07g38760D	Alpha/beta hydrolase fold-1;Epoxide hydrolase-like	-0.175232	0.979221	-2.41052	0.0275723	-1.51216	0.125905		b		b
BnaC02g16130D	no data	0.36804	0.917626	2.16214	0.0194424	3.43624	1.14407e-05		b	c	bc
BnaA09g05080D	C2 calcium-dependent membrane targeting;C2 calcium/lipid-binding domain, CaLB;C2 membrane targeting protein	-1.31823	0.324901	-2.10778	0.000264279	-0.51307	0.449651		b		b
BnaCnng38690D	Translation initiation factor IF-1;RNA-binding domain, S1, IF1 type;Nucleic acid-binding, OB-fold;RNA-binding domain, S1	-0.759948	0.0248476	-0.114102	0.901422	0.115757	0.851404	a			a
BnaC06g43540D	Calcium-binding EF-hand;EF-hand-like domain;EF-Hand 1, calcium-binding site	0.84473	0.347473	0.576366	0.353233	0.952913	0.0385458			c	c
BnaA02g01790D	no data	-0.39381	0.779354	0.950769	0.0492511	-0.170998	0.774169		b		b
BnaC06g04100D	Uncharacterised protein family UPF0136, Transmembrane	0.447741	0.898477	-1.94514	0.0134644	-1.12916	0.133102		b		b
BnaA04g11230D	Protein kinase, catalytic domain;Serine-threonine/tyrosine-protein kinase catalytic domain;Serine/threonine- / dual specificity protein kinase, catalytic domain;Protein kinase-like domain;Concanavalin A-like lectin/glucanase, subgroup;Protein kinase, ATP binding site;Tyrosine-protein kinase, catalytic domain;Malectin-like carbohydrate-binding domain	0.0356321	0.999778	-2.41017	0.0136384	-0.984595	0.310076		b		b
BnaA10g02180D	no data	0.0261207	0.99562	-0.300409	0.719011	-1.17222	0.0127837			c	c
BnaC04g03640D	C1-like	-0.767982	0.935992	-4.88127	0.00212309	-6.30962	2.00082e-06		b	c	bc
BnaC02g32740D	Mitochondrial substrate/solute carrier;Mitochondrial carrier domain	-0.740083	0.0241698	-1.53364	9.30327e-05	-0.535498	0.226458	a	b		ab
BnaA07g32420D	Dehydrin	-0.0119932	1	0.224029	0.78014	1.10454	0.00775489			c	c
BnaCnng30810D	Transcription factor TAFII-31;Histone-fold	0.0961327	0.944638	0.840997	0.00491437	0.234698	0.51423		b		b
BnaC05g08650D	Protein kinase, catalytic domain;S-locus glycoprotein;Bulb-type lectin domain;Serine/threonine- / dual specificity protein kinase, catalytic domain;Apple-like;Serine/threonine-protein kinase, active site;Protein kinase-like domain;PAN-2 domain;Concanavalin A-like lectin/glucanase, subgroup;Tyrosine-protein kinase, catalytic domain;S-locus receptor kinase, C-terminal	0.0992405	0.970595	-3.75004	0.00224973	-3.32889	0.00258286		b	c	bc
BnaC06g23230D	Glycerophosphoryl diester phosphodiesterase;PLC-like phosphodiesterase, TIM beta/alpha-barrel domain	-0.012188	1	-2.18973	0.0145083	-1.89889	0.0204444		b	c	bc
BnaA04g17580D	KIP1-like	0.22642	0.904771	1.1152	0.0149447	1.10223	0.00921248		b	c	bc
BnaA01g34970D	Phloem protein 2-like	0.430115	0.637706	0.731256	0.0950953	1.17201	0.00128231			c	c
BnaC07g43490D	DNA-binding WRKY	-1.90229	0.458958	-4.051	6.12404e-07	-1.90362	0.0102293		b	c	bc
BnaC06g30070D	no data	0.137043	0.948288	0.488875	0.422763	1.16883	0.00461559			c	c
BnaCnng47950D	Male sterility, NAD-binding;NAD(P)-binding domain;Fatty acyl-CoA reductase	-0.152033	0.970595	0.946163	0.289965	2.37701	0.000129501			c	c
BnaCnng29140D	Ribosomal protein L34Ae;Protein of unknown function DUF1666	0.525071	0.928699	-4.09737	0.00555081	-1.4291	0.32607		b		b
BnaC09g20370D	Thiolase;Thiolase-like, subgroup;Thiolase-like;Thiolase, active site;Thiolase, conserved site;Thiolase, N-terminal;Thiolase, C-terminal	0.0968822	0.965749	1.10085	0.0913995	1.44572	0.007801			c	c
BnaA01g36770D	Late embryogenesis abundant protein, LEA-14	-0.138183	0.993862	-3.1509	0.0133915	-2.53676	0.0226884		b	c	bc
BnaA09g46240D	Protein of unknown function DUF1262	0.809627	0.857834	-2.83187	0.00595896	-3.72288	5.44104e-05		b	c	bc
BnaC04g09100D	no data	0.830552	0.772645	-0.409445	0.631102	1.06828	0.0306804			c	c
BnaA05g25270D	DnaJ domain	0.654205	0.382091	1.45251	0.000905285	2.35272	3.03518e-09		b	c	bc
BnaA04g28630D	Glutathione S-transferase, N-terminal;Glutathione S-transferase, C-terminal;Glutathione S-transferase, C-terminal-like;Thioredoxin-like fold;Glutathione S-transferase/chloride channel, C-terminal	0.224919	0.94113	-3.60101	0.000934951	-3.83906	9.08277e-05		b	c	bc
BnaA01g12090D	Protein of unknown function DUF3537	-0.11263	0.966387	0.780679	0.415287	2.03624	0.001117			c	c
BnaA09g30190D	Heavy metal-associated domain, HMA	-0.0970946	1	-7.15017	0.000719956	-2.2866	0.228202		b		b
BnaC04g04470D	Homeodomain;START domain;Homeodomain-like;Homeobox, conserved site	-0.694622	0.0456604	-0.673254	0.125859	-1.24211	0.000363791	a		c	ac
BnaC03g75790D	Armadillo;U box domain;Armadillo-like helical;Zinc finger, RING/FYVE/PHD-type;Armadillo-type fold	-0.559981	0.855809	0.185325	0.895104	1.53306	0.014738			c	c
BnaA07g32360D	Alpha amylase;Glycosyl hydrolase, family 13, catalytic domain;Glycosyl hydrolase, family 13, subfamily, catalytic domain;Alpha-amylase, C-terminal beta-sheet;Alpha-amylase, plant;Glycosyl hydrolase, family 13, all-beta;Glycoside hydrolase, catalytic domain;Glycoside hydrolase, family 13;Glycoside hydrolase, superfamily	-1.14853	0.0368677	-1.68653	2.67328e-06	0.151181	0.762633	a	b		ab
BnaC05g21000D	Protein of unknown function DUF3411	-0.0644426	0.985263	0.1939	0.949567	2.92401	0.0461129			c	c
BnaC08g30360D	Glycoside hydrolase, family 1;Glycoside hydrolase, catalytic domain;Glycoside hydrolase, superfamily;Glycoside hydrolase, family 1, active site	-3.48227	0.518698	-6.84698	0.00303449	-5.79951	0.00268053		b	c	bc
BnaA08g00950D	Alpha crystallin/Hsp20 domain;HSP20-like chaperone	2.42718	4.98325e-05	4.32767	0.000133172	4.56124	2.82977e-05	a	b	c	abc
BnaA03g00260D	Ferritin;Ferritin/DPS protein domain;Ferritin- like diiron domain;Ferritin/ribonucleotide reductase-like;Ferritin-related;Ferritin, conserved site	-1.31169	0.233734	-2.57705	0.000240463	-3.28902	3.43399e-07		b	c	bc
BnaA07g22470D	UDP-glucuronosyl/UDP-glucosyltransferase	-0.615997	0.917626	1.06144	0.384038	1.68581	0.023127			c	c
BnaA02g05220D	Leucine-rich repeat;Leucine-rich repeat-containing N-terminal, type 2;Leucine rich repeat 4	-0.129694	0.957715	-2.31351	0.00503126	-1.66986	0.0309315		b	c	bc
BnaA02g24410D	no data	0.925374	0.923718	-3.57477	0.0283025	-2.2229	0.0989794		b		b
BnaC03g30720D	Dormancyauxin associated	1.54829	1.8451e-08	1.83556	4.97873e-05	1.61125	0.000184614	a	b	c	abc
BnaA07g22910D	Toll/interleukin-1 receptor homology (TIR) domain;NB-ARC;Root hair defective 3 GTP-binding	-1.8946	0.78482	-0.152674	0.959357	2.00957	0.00747116			c	c
BnaC03g50570D	No apical meristem (NAM) protein	0.627579	0.864555	-2.01508	0.00255331	-0.735785	0.301614		b		b
BnaA10g08410D	no data	1.53387	0.00807907	-0.0474254	0.974683	0.413953	0.555405	a			a
BnaC08g36090D	Phospholipase-like, arabidopsis	-0.301756	0.847457	-0.422527	0.56341	-1.0555	0.0225021			c	c
BnaC09g36120D	Exostosin-like	0.241277	0.901634	0.215523	0.873635	-1.55488	0.0261403			c	c
BnaA01g04650D	Tetratricopeptide-like helical	1.22025	0.0218287	1.92172	0.00347411	0.974513	0.141692	a	b		ab
BnaA03g25360D	Domain of unknown function DUF221	-0.238631	0.918953	0.555993	0.16537	0.805981	0.0127907			c	c
BnaC08g19610D	Protein of unknown function DUF597	0.887698	0.410028	0.749954	0.357421	1.60406	0.00380157			c	c
BnaC02g32710D	VQ	0.40637	0.914413	-1.758	0.0245084	-1.27243	0.0732866		b		b
BnaC05g45750D	no data	0.209094	0.845735	-0.352907	0.691449	-2.15684	9.80119e-06			c	c
BnaC03g48320D	no data	-0.306404	0.970334	-3.69241	0.000632494	-1.19336	0.278725		b		b
BnaC05g19270D	Actin-binding FH2/DRF autoregulatory;Actin-binding FH2	0.410137	0.897033	-3.60254	0.00173	-2.5314	0.0120093		b	c	bc
BnaA01g35190D	no data	0.550085	0.905544	1.30812	0.0198087	2.15838	1.95877e-07		b	c	bc
BnaA01g07000D	Rab-GTPase-TBC domain	-0.0233623	0.994647	-1.40879	0.000709945	-0.50838	0.281665		b		b
BnaC05g15780D	Dehydrin	-0.392498	0.840818	0.252727	0.81523	1.27965	0.0188165			c	c
BnaA07g25460D	Protein kinase, catalytic domain;S-locus glycoprotein;Serine-threonine/tyrosine-protein kinase catalytic domain;Serine/threonine- / dual specificity protein kinase, catalytic domain;Apple-like;Serine/threonine-protein kinase, active site;Protein kinase-like domain;PAN-2 domain;Protein kinase, ATP binding site;Tyrosine-protein kinase, catalytic domain;S-locus receptor kinase, C-terminal;S-locus, r…	-1.01712	0.290116	-4.9593	2.99307e-05	-3.40642	0.00147292		b	c	bc
BnaC03g42260D	Small GTPase superfamily;Small GTPase superfamily, Rho type;Small GTPase superfamily, Rab type;Mitochondrial Rho-like;Small GTPase superfamily, Tem1	-0.400676	0.683206	-1.20476	0.00153366	0.334028	0.461515		b		b
BnaA05g32040D	Lipase, GDXG, active site;Alpha/beta hydrolase fold-3	0.700176	0.632223	0.981742	0.0308238	0.302338	0.541917		b		b
BnaC08g13120D	Rab-GTPase-TBC domain	-1.13556	0.278565	-1.6247	0.00651026	-1.43984	0.0103937		b	c	bc
BnaC09g37240D	Germin;Cupin 1;RmlC-like cupin domain;RmlC-like jelly roll fold;Germin, manganese binding site	0.0302349	0.995355	1.76555	0.00824997	-0.434873	0.60661		b		b
BnaC02g35980D	Cytochrome P450;Cytochrome P450, E-class, group I;Cytochrome P450, conserved site	0.367448	0.864555	-3.11473	0.00921359	-3.14346	0.00291621		b	c	bc
BnaA02g00660D	Peptidase A1;Aspartic peptidase	-0.285665	0.789604	-1.436	0.0133871	-1.25977	0.0230489		b	c	bc
BnaA03g20230D	Beta-lactamase, class-B, conserved site;Beta-lactamase-like;Hydroxyacylglutathione hydrolase	-0.237535	0.770604	-0.595024	0.241506	-0.889013	0.0259291			c	c
BnaA03g08880D	FAS1 domain	0.0759207	0.982334	-0.758115	0.253813	-1.59136	0.00674037			c	c
BnaC08g20480D	Zinc finger, DHHC-type, palmitoyltransferase	-0.416947	0.565446	-1.24588	0.00767199	-0.831039	0.0735156		b		b
BnaC08g08050D	Cyclophilin-like peptidyl-prolyl cis-trans isomerase domain	0.39907	0.439399	0.973703	0.0114528	1.10769	0.00174711		b	c	bc
BnaC02g15950D	Lipoxygenase;Lipoxygenase, LH2;Lipoxygenase, plant;Lipase/lipooxygenase, PLAT/LH2;Lipoxygenase, C-terminal;Lipoxygenase, iron binding site;Lipoxygenase, conserved site	-0.457507	0.634303	0.989437	0.389546	2.26244	0.00422465			c	c
BnaC03g37610D	Glycoside hydrolase, family 19, catalytic;Glycoside hydrolase, family 19;Lysozyme-like domain	-0.447168	0.640357	0.255443	0.85527	2.31722	0.000396757			c	c
BnaAnng05850D	Phosphate-induced protein 1	-1.22772	0.681708	-2.84576	5.10437e-05	-2.75142	1.72791e-05		b	c	bc
BnaC04g16470D	no data	0.390392	0.845551	-1.34254	0.0226922	-0.283126	0.689691		b		b
BnaC02g40010D	Protein kinase, catalytic domain;Serine-threonine/tyrosine-protein kinase catalytic domain;Serine/threonine- / dual specificity protein kinase, catalytic domain;Gnk2-homologous domain;Serine/threonine-protein kinase, active site;Protein kinase-like domain;Concanavalin A-like lectin/glucanase, subgroup;Protein kinase, ATP binding site;Tyrosine-protein kinase, catalytic domain	-2.01172	0.778404	-6.981	7.45745e-05	-4.34969	0.00352592		b	c	bc
BnaA08g02160D	Transcription factor GRAS	0.047639	0.984484	-0.511817	0.3458	-0.957852	0.021416			c	c
BnaA02g24100D	Ribosomal protein L5;Ribosomal protein L5, conserved site;Ribosomal protein L5 domain	-0.250696	0.82692	-0.0626262	0.956396	-1.0533	0.0235035			c	c
BnaA01g22680D	Mlo-related protein	-0.0131438	1	-3.36625	0.0118114	-2.77621	0.0158517		b	c	bc
BnaA10g28460D	no data	1.36642	0.63934	-2.39194	0.0280216	-1.32034	0.190653		b		b
BnaC09g20090D	AP2/ERF domain;DNA-binding, integrase-type	-0.162879	0.97967	-2.37148	0.00294239	-0.779137	0.353747		b		b
BnaA09g44740D	NADH:flavin oxidoreductase/NADH oxidase, N-terminal;Aldolase-type TIM barrel	-0.131477	0.985609	1.42711	0.0187258	1.74969	0.000471298		b	c	bc
BnaA03g43670D	Domain of unknown function DUF250	-0.535426	0.864555	-2.51667	6.3995e-05	-2.61717	4.33695e-06		b	c	bc
BnaA04g13250D	no data	0.00135729	1	1.29555	0.311092	2.32773	0.00179205			c	c
BnaC06g39860D	Aldehyde dehydrogenase domain;Aldehyde dehydrogenase, conserved site;Aldehyde/histidinol dehydrogenase;Aldehyde dehydrogenase, N-terminal;Aldehyde dehydrogenase, C-terminal	0.0778578	0.95841	0.934697	0.00683687	1.21733	0.000106436		b	c	bc
BnaC01g39040D	no data	2.27854	0.583856	0.901061	0.578665	1.69101	0.0312571			c	c
BnaA08g11360D	C2 calcium-dependent membrane targeting;C2 calcium/lipid-binding domain, CaLB;C2 membrane targeting protein	-0.286025	0.972415	-2.86681	0.00283896	-0.925621	0.343329		b		b
BnaC02g06810D	Leucine-rich repeat-containing N-terminal, type 2	0.565591	0.946729	-3.055	0.00843636	-0.916837	0.401155		b		b
BnaC09g30090D	no data	0.483163	0.618221	1.60673	0.151922	2.00548	0.0350204			c	c
BnaC08g11070D	Polyketide cyclase/dehydrase;START-like domain	-1.00825	0.267194	-1.68687	0.0120919	-2.78339	2.40954e-06		b	c	bc
BnaC08g23990D	no data	0.257614	0.871055	1.18058	0.182381	1.99183	0.00460396			c	c
BnaC03g58870D	NUDIX hydrolase domain;NUDIX hydrolase domain-like;NUDIX hydrolase, AtNUDT22	-0.25812	0.960159	0.340888	0.718659	1.1339	0.0247018			c	c
BnaA03g13820D	DNA-binding WRKY	1.87775	0.779354	-3.80439	0.00998866	-4.29154	0.000646731		b	c	bc
BnaA03g11920D	Protein of unknown function DUF761, plant;Domain of unknown function DUF4408	0.0196003	1	-3.50415	1.92943e-05	-2.41998	0.00106864		b	c	bc
BnaCnng17760D	no data	-1.41766	0.000947699	-2.16015	0.000133134	-3.66933	6.93908e-11	a	b	c	abc
BnaA05g01590D	Protein of unknown function DUF2358	0.503538	0.310392	0.936938	0.128254	2.09553	1.10215e-05			c	c
BnaA07g32040D	DnaJ domain	0.342172	0.847457	1.14551	0.003402	0.639598	0.117691		b		b
BnaA01g08390D	no data	-0.32443	0.957706	-4.60914	0.00113617	-2.69735	0.0416619		b	c	bc
BnaC02g16920D	Protein kinase, catalytic domain;Serine-threonine/tyrosine-protein kinase catalytic domain;Serine/threonine- / dual specificity protein kinase, catalytic domain;Serine/threonine-protein kinase, active site;Protein kinase-like domain;Concanavalin A-like lectin/glucanase, subgroup;Protein kinase, ATP binding site;Tyrosine-protein kinase, catalytic domain	0.223539	0.959283	-2.28862	0.0308694	-1.50181	0.117558		b		b
BnaCnng45760D	DNA-binding WRKY	-0.61012	0.942889	-2.49172	0.0251759	-1.79654	0.0622697		b		b
BnaCnng24950D	Leucine-rich repeat, cysteine-containing subtype	-0.444807	0.871797	-0.927773	0.196121	-1.12416	0.0488544			c	c
BnaA01g07280D	Thioredoxin;Thioredoxin-like fold;Thioredoxin domain;Thioredoxin, conserved site	0.170506	0.938039	0.921367	0.00169273	0.381704	0.238749		b		b
BnaA09g54920D	Ribosomal protein S21e;Ribosomal protein S21e, conserved site	-0.0613124	0.966387	0.171451	0.902431	-1.31915	0.0439843			c	c
BnaA10g25190D	Protein of unknown function DUF3133	-0.217845	0.974612	-2.47392	4.46269e-05	-1.38974	0.00640786		b	c	bc
BnaA06g05310D	Nicotianamine synthase	-0.244187	0.885873	-0.812412	0.0687479	-1.14404	0.00288908			c	c
BnaCnng26110D	Six-bladed beta-propeller, TolB-like;Strictosidine synthase, conserved region	0.296214	0.845563	1.04493	0.0879799	2.04468	4.4352e-05			c	c
BnaA01g01570D	Thaumatin	0.522741	0.871821	1.62706	0.0227427	2.72034	2.06947e-06		b	c	bc
BnaC07g09610D	no data	-0.696332	0.932664	-4.57195	0.001003	-3.86623	0.00111278		b	c	bc
BnaC04g50850D	Phosphatidylinositol 3-/4-kinase, catalytic domain;Protein kinase-like domain;Ubiquitin supergroup	0.222741	0.915333	0.38039	0.469348	0.715039	0.0489524			c	c
BnaA05g24390D	AP2/ERF domain;DNA-binding, integrase-type	-0.16861	0.912624	-0.436498	0.207741	-0.829453	0.00180528			c	c
BnaC02g06690D	Glutamine synthetase, catalytic domain;Glutamine synthetase, beta-Grasp;Glutamine synthetase/guanido kinase, catalytic domain;Glutamine synthetase, N-terminal conserved site;Glutamine synthetase, glycine-rich site	-1.07757	0.106169	-3.07459	2.83544e-06	-2.84157	3.33957e-06		b	c	bc
BnaA01g30200D	Nucleic acid-binding, OB-fold;Replication factor A, C-terminal	-0.0462293	0.984357	0.450446	0.457094	0.926817	0.0255487			c	c
BnaC04g42730D	GNAT domain;Acyl-CoA N-acyltransferase	1.65795	0.637706	-4.2068	0.00352031	-2.79172	0.0245322		b	c	bc
BnaC09g09840D	Protein kinase, catalytic domain;Serine/threonine- / dual specificity protein kinase, catalytic domain;Serine/threonine-protein kinase, active site;Protein kinase-like domain;Concanavalin A-like lectin/glucanase, subgroup;Protein kinase, ATP binding site;Tyrosine-protein kinase, catalytic domain	0.000540263	1	-0.899855	0.0377524	-0.610792	0.151564		b		b
BnaA05g27420D	Late embryogenesis abundant protein, LEA-14	-0.203876	0.820088	-0.886055	0.0493777	-0.640631	0.145601		b		b
BnaA07g16210D	no data	0.821268	0.88468	0.715123	0.625803	1.64297	0.00971198			c	c
BnaC07g45720D	Protein kinase, catalytic domain;Serine-threonine/tyrosine-protein kinase catalytic domain;Serine/threonine- / dual specificity protein kinase, catalytic domain;Protein kinase-like domain;Concanavalin A-like lectin/glucanase, subgroup;Tyrosine-protein kinase, catalytic domain	0.412765	0.907715	-4.59468	0.00413501	-3.00662	0.0269955		b	c	bc
BnaCnng26710D	Blue (type 1) copper domain;Blue (type 1) copper protein;Plastocyanin;Cupredoxin	-0.999375	0.0252706	-0.954901	0.0159303	-1.09194	0.00302709	a	b	c	abc
BnaA09g13300D	Oxoglutarate/iron-dependent dioxygenase;Non-haem dioxygenase N-terminal domain	-0.0283746	0.993357	-2.27155	0.0128924	-1.30106	0.138686		b		b
BnaA01g01120D	Transcription factor GRAS	0.257282	0.943061	-0.0101828	0.993137	1.03478	0.011409			c	c
BnaA02g32350D	Acid phosphatase (Class B);Acid phosphatase, plant;Vegetative storage protein/acid phosphatase;HAD-like domain	-0.731085	0.373365	2.96137	0.00197253	3.6938	2.44609e-05		b	c	bc
BnaA01g37180D	Prenylated rab acceptor PRA1	-0.788029	0.738135	-1.22893	0.027483	0.448338	0.43422		b		b
BnaC01g20120D	Plastocyanin-like;Cupredoxin	0.364981	0.841901	-0.0922211	0.957081	1.45367	0.0377436			c	c
BnaC05g08770D	Prephenate dehydratase;ACT domain;Glyoxalase/fosfomycin resistance/dioxygenase domain;Glyoxalase I;Glyoxalase I, conserved site;Prephenate dehydratase, conserved site	0.242865	0.811673	0.0262539	0.985492	1.37158	0.0126312			c	c
BnaC02g00890D	Phosphate-induced protein 1	-0.845544	0.813846	-4.72173	2.74649e-06	-3.71122	3.10972e-05		b	c	bc
BnaA04g04690D	Protein of unknown function DUF3741;Domain of unknown function DUF4378	-0.148232	0.957076	0.603225	0.260732	1.21063	0.00168173			c	c
BnaA08g16060D	ENTH/VHS;AP180 N-terminal homology (ANTH) domain;Epsin-like, N-terminal	0.434135	0.818014	0.811206	0.199864	1.22091	0.010592			c	c
BnaA05g02510D	Remorin, C-terminal	0.45976	0.670864	1.25514	0.0839212	1.80056	0.00246523			c	c
BnaC07g44780D	Putative cyclase	0.395958	0.800939	-2.59751	0.0277817	-2.24506	0.0306832		b	c	bc
BnaC07g00660D	DENN domain;dDENN domain;uDENN domain	-0.395344	0.853406	-1.59222	0.121653	-1.74605	0.0433699			c	c
BnaA07g09530D	X8	0.319017	0.918968	-1.24427	0.0374469	-2.4354	0.000252224		b	c	bc
BnaCnng65950D	Equilibrative nucleoside transporter	0.00917814	1	-0.985114	0.0533542	-2.11172	3.34473e-07			c	c
BnaA08g16560D	Ribonucleotide reductase large subunit, C-terminal;ATP-cone;Ribonucleotide reductase R1 subunit, N-terminal;Ribonucleotide reductase, class I , alpha subunit;Ribonucleotide reductase large subunit, N-terminal	-0.131605	0.949467	-0.434083	0.747885	-1.52819	0.0453921			c	c
BnaC04g00330D	Glycosyl transferase, family 8	-0.420963	0.928084	1.51035	0.16564	4.18158	3.39035e-06			c	c
BnaA07g27260D	Glycolipid transfer protein domain	-0.0998641	1	-3.43913	0.00440579	-0.386093	0.686454		b		b
BnaA10g21540D	Peptidase A1;Aspartic peptidase	-0.0279648	0.998251	-1.58792	0.0237039	-0.865044	0.208409		b		b
BnaCnng54710D	Streptomyces cyclase/dehydrase	-0.704575	0.0872851	-0.965077	0.00440697	0.0980912	0.840999		b		b
BnaC05g03070D	Leucine-rich repeat;Leucine-rich repeat, typical subtype;Leucine rich repeat 4	0.0022283	1	-6.1012	8.68618e-05	-5.19763	0.000202504		b	c	bc
BnaC07g44410D	no data	0.459997	0.840891	0.862641	0.407973	1.61484	0.0220417			c	c
BnaA07g17260D	Cation-transporting P-type ATPase;Cation-transporting P-type ATPase, N-terminal;Cation-transporting P-type ATPase, C-terminal;Calcium-transporting P-type ATPase, subfamily IIB;P-type ATPase, A domain;P-type ATPase, phosphorylation site;HAD-like domain;P-type ATPase, transmembrane domain;P-type ATPase, cytoplasmic domain N;Calcium-transporting P-type ATPase, N-terminal autoinhibitory domain	-0.906926	0.146463	-1.65818	0.00555081	-0.819216	0.193294		b		b
BnaA05g08660D	no data	1.07015	0.745461	2.23503	0.00962931	3.85683	3.53288e-07		b	c	bc
BnaC02g24140D	Auxin efflux carrier	-0.784858	0.0679583	-1.73661	0.00409913	-2.58582	3.32107e-06		b	c	bc
BnaA08g14810D	Auxin responsive SAUR protein	0.104391	0.976037	-0.984476	0.269505	-3.45242	0.0014688			c	c
BnaC06g19610D	MIF4G-like, type 3;Initiation factor eIF-4 gamma, MA3;MIF4-like, type 1/2/3;Armadillo-type fold	-0.640536	0.75944	1.34146	0.00920218	0.727792	0.160559		b		b
BnaA02g32390D	no data	2.62635	0.00384687	filtre	filtre	filtre	filtre	a			a
BnaA08g15450D	Homeodomain;POX;Homeobox KN domain;Homeodomain-like	-0.291874	0.79051	-0.816896	0.0144874	-1.13267	0.000202818		b	c	bc
BnaAnng40320D	Lipase, GDSL;SGNH hydrolase-type esterase domain	-0.225632	0.914413	1.53606	0.00401857	1.59542	0.00180742		b	c	bc
BnaA09g40650D	Uncharacterised protein family UPF0136, Transmembrane	-0.632658	0.597932	-1.37171	0.104264	-1.81938	0.0105031			c	c
BnaC07g50320D	Plastocyanin-like;Cupredoxin	-0.715742	0.67778	-0.207727	0.771135	1.10939	0.0025134			c	c
BnaC04g33740D	Magnesium transporter NIPA	-0.410723	0.842325	-1.79279	0.0195868	-0.581092	0.47984		b		b
BnaA10g25410D	Protein kinase, catalytic domain;Calcium-binding EF-hand;Serine/threonine- / dual specificity protein kinase, catalytic domain;Serine/threonine-protein kinase, active site;Protein kinase-like domain;EF-hand-like domain;Protein kinase, ATP binding site;EF-Hand 1, calcium-binding site;Tyrosine-protein kinase, catalytic domain	-0.603892	0.580507	-1.38951	7.21023e-06	-1.06162	0.00030349		b	c	bc
BnaCnng59280D	no data	0.644194	0.227486	0.697046	0.03159	0.0583891	0.897085		b		b
BnaC07g37540D	no data	-1.92191	0.791847	-1.7769	0.472752	-1.5979	0.0374285			c	c
BnaA06g20760D	Signal transduction response regulator, receiver domain;CheY-like superfamily	-0.308829	0.911468	-2.58328	0.00111492	-0.810202	0.409981		b		b
BnaA05g31410D	Pectinacetylesterase	-0.84626	0.0925195	-0.608859	0.289636	-2.08177	4.15841e-07			c	c
BnaA06g29270D	Basic-leucine zipper domain;Basic leucine-zipper, C-terminal	-0.176523	0.887156	-0.343891	0.575125	-1.11386	0.00354395			c	c
BnaC03g77680D	Acid phosphatase (Class B);Acid phosphatase, plant;Vegetative storage protein/acid phosphatase;HAD-like domain	-0.443374	0.444396	0.644059	0.563165	1.80425	0.00835171			c	c
BnaA10g27920D	no data	1.18077	0.686876	1.34602	0.112942	1.38012	0.0386708			c	c
BnaA07g07450D	Protein of unknown function DUF761, plant	0.866397	0.562807	-1.75302	0.0203897	-1.5358	0.028762		b	c	bc
BnaA07g05600D	Helix-turn-helix type 3;Lambda repressor-like, DNA-binding domain;Multiprotein bridging factor 1, N-terminal	1.71362	0.00999668	3.86987	4.04425e-11	5.71459	3.84359e-23	a	b	c	abc
BnaA05g04220D	Protein of unknown function DUF581	-0.599939	0.34648	-1.43381	0.00144653	-0.883764	0.0644622		b		b
BnaC05g06530D	Protein kinase, catalytic domain;Serine/threonine- / dual specificity protein kinase, catalytic domain;Serine/threonine-protein kinase, active site;Protein kinase-like domain;Protein kinase, ATP binding site;Tyrosine-protein kinase, catalytic domain	0.429102	0.588513	-0.0668005	0.951153	-1.13861	0.0144106			c	c
BnaC01g20780D	Major pollen allergen Lol pI;Expansin/pollen allergen, DPBB domain;Expansin, cellulose-binding-like domain;Expansin/Lol pI;Barwin-related endoglucanase;Barwin-like endoglucanase	0.394506	0.793881	0.726266	0.37494	1.566	0.00715114			c	c
BnaA09g51540D	Protein kinase, catalytic domain;Serine/threonine- / dual specificity protein kinase, catalytic domain;NAF domain;Serine/threonine-protein kinase, active site;Protein kinase-like domain;Protein kinase, ATP binding site;NAF/FISL domain;Tyrosine-protein kinase, catalytic domain	-0.0540402	0.994353	0.339191	0.793807	1.39619	0.0490363			c	c
BnaC04g01250D	Cyclic nucleotide-binding domain;Ion transport domain;RmlC-like jelly roll fold;Cyclic nucleotide-binding-like	-0.362996	0.807131	-4.53173	0.00090286	-3.78133	0.00183738		b	c	bc
BnaA03g18900D	Zinc finger, CCCH-type;Ankyrin repeat;Ankyrin repeat-containing domain	0.832184	0.925245	-1.65343	0.0403126	-0.356439	0.626837		b		b
BnaC07g44590D	Mpv17/PMP22	-0.472204	0.848574	-1.79613	0.000544057	-1.09411	0.0234174		b	c	bc
BnaC06g21740D	Protein of unknown function DUF4228	-0.555128	0.913743	-1.22404	0.181474	-1.77226	0.00202591			c	c
BnaA02g11430D	Lipoxygenase;Lipoxygenase, LH2;Lipoxygenase, plant;Lipase/lipooxygenase, PLAT/LH2;Lipoxygenase, C-terminal;Lipoxygenase, iron binding site;Lipoxygenase, conserved site	-0.494062	0.658128	0.618622	0.567969	1.66603	0.0140041			c	c
BnaCnng03690D	Oxysterol-binding protein;Oxysterol-binding protein, conserved site	-0.332207	0.940348	-5.19346	0.000316118	-3.93969	0.00145977		b	c	bc
BnaC06g12130D	SANT/Myb domain;Myb domain, plants;Homeodomain-like;Myb domain	-0.999472	0.0158214	-0.61626	0.255411	-0.929883	0.0261741	a		c	ac
BnaC06g37420D	Domain of unknown function CP12	2.11758	6.74461e-09	2.75172	3.09119e-12	2.34629	3.90112e-10	a	b	c	abc
BnaA08g21740D	Cyclin, C-terminal domain;Cyclin, N-terminal;Cyclin-like;Cyclin A/B/D/E	0.366284	0.761496	0.344632	0.705121	1.29626	0.0115858			c	c
BnaCnng04780D	Anthranilate synthase/para-aminobenzoate synthase, glutamine amidotransferase;Glutamine amidotransferase type 1	-0.468836	0.259568	-0.878947	0.0436547	-0.12678	0.823654		b		b
BnaCnng74290D	Nucleic acid-binding, OB-fold;Replication factor A, C-terminal	0.206877	0.917717	0.269281	0.880165	1.85664	0.0391977			c	c
BnaA01g28130D	Predicted eukaryotic LigT;Protein kinase A anchor protein, nuclear localisation signal domain	0.149452	0.980104	-2.27713	0.0868923	-2.40475	0.0287708			c	c
BnaCnng10920D	no data	-0.0179984	0.999522	-0.0610017	0.943508	0.809062	0.0213598			c	c
BnaC09g12830D	AP2/ERF domain;DNA-binding, integrase-type	-1.47572	0.79361	0.0939632	0.965592	-1.9611	0.0186079			c	c
BnaC07g34240D	no data	3.12292	0.481279	-5.12581	0.000648177	-3.519	0.00708754		b	c	bc
BnaA05g32810D	Exostosin-like	-0.298749	0.991012	-2.3405	0.035026	-0.56247	0.565344		b		b
BnaA07g25100D	IQ motif, EF-hand binding site;Ankyrin repeat;Cell surface receptor IPT/TIG;CG-1 DNA-binding domain;Immunoglobulin-like fold;Immunoglobulin E-set;Ankyrin repeat-containing domain	0.161098	0.925564	-0.378142	0.534983	-1.02727	0.00796375			c	c
BnaCnng71230D	Protein kinase, catalytic domain;Serine-threonine/tyrosine-protein kinase catalytic domain;Serine/threonine- / dual specificity protein kinase, catalytic domain;Gnk2-homologous domain;Serine/threonine-protein kinase, active site;Protein kinase-like domain;Concanavalin A-like lectin/glucanase, subgroup;Protein kinase, ATP binding site;Tyrosine-protein kinase, catalytic domain	0.152328	0.957747	-2.27795	0.00839026	-1.71025	0.0370855		b	c	bc
BnaA09g51010D	Domain of unknown function DUF4033	-0.508456	0.539198	-1.13342	0.0395419	0.538297	0.357876		b		b
BnaC09g45110D	GTP binding domain;GTP-binding protein, ribosome biogenesis, YsxC	0.0776581	0.971973	1.49334	1.21252e-05	0.868067	0.0089585		b	c	bc
BnaC04g31650D	no data	-0.201703	0.941815	0.173333	0.844272	0.87319	0.0477025			c	c
BnaA06g01540D	Glycoside hydrolase, family 1;Glycoside hydrolase, catalytic domain;Glycoside hydrolase, superfamily;Glycoside hydrolase, family 1, active site	0.0950804	0.983102	0.843606	0.65998	3.60948	0.00195178			c	c
BnaA06g16270D	AMP-dependent synthetase/ligase;AMP-binding, conserved site;Domain of unknown function DUF4009	0.726565	0.0397276	-1.35941	0.129533	-0.554393	0.543839	a			a
BnaA04g04650D	Protein kinase, catalytic domain;Serine/threonine- / dual specificity protein kinase, catalytic domain;Protein kinase-like domain;Tyrosine-protein kinase, catalytic domain	0.568856	0.917187	-1.27742	0.0393948	-0.447224	0.442627		b		b
BnaC04g45590D	SOUL haem-binding protein;Regulatory factor, effector, bacterial	-0.540567	0.883673	-4.60197	5.80065e-06	-1.71859	0.0634628		b		b
BnaA03g32960D	Phox-associated domain;Sorting nexin, C-terminal;PX-associated, sorting nexin 13	-2.71116	0.622524	-10.61	8.12533e-05	-4.71008	0.0304951		b	c	bc
BnaAnng05780D	Ribosomal protein L5;Ribosomal protein L5, conserved site;Ribosomal protein L5 domain	-0.312733	0.686876	-0.396859	0.561818	-1.32967	0.00175737			c	c
BnaA07g11450D	Dehydrin	0.00408657	1	-0.001139	0.999067	1.44893	0.00112247			c	c
BnaA09g42180D	Late embryogenesis abundant protein, LEA-18	0.100827	0.983123	0.606561	0.191802	1.15478	0.00116375			c	c
BnaC04g10590D	Mitochodrial transcription termination factor-related	0.832361	0.0714927	0.44087	0.427406	0.916838	0.0184334			c	c
BnaA06g27480D	Cytochrome P450;Cytochrome P450, E-class, group I;Cytochrome P450, conserved site	-0.777518	0.203793	-1.00755	0.0584351	-3.03513	9.86804e-12			c	c
BnaA10g20610D	Alpha crystallin/Hsp20 domain;HSP20-like chaperone	0.582898	0.842325	4.71207	1.96356e-10	4.99484	4.98062e-13		b	c	bc
BnaC02g47170D	Toll/interleukin-1 receptor homology (TIR) domain;Disease resistance protein;Leucine-rich repeat;NB-ARC;Leucine-rich repeat 3	-0.265473	0.956191	-0.519873	0.533882	1.38954	0.00710437			c	c
BnaC03g58220D	Pyridoxal phosphate-dependent decarboxylase;Pyridoxal phosphate-dependent transferase, major region, subdomain 1;Pyridoxal phosphate-dependent transferase	-0.118523	0.972559	-0.829419	0.248465	-1.39362	0.0098766			c	c
BnaC09g27360D	AP2/ERF domain;DNA-binding, integrase-type	1.38082	0.0267355	0.477753	0.506251	0.80045	0.112793	a			a
BnaC03g01090D	FAS1 domain	0.000857899	1	-0.0448073	0.97393	-1.15415	0.0486845			c	c
BnaA02g11740D	no data	0.677714	0.665975	2.14148	0.0152331	3.07357	2.76061e-05		b	c	bc
BnaC01g44280D	Protein kinase, catalytic domain;Bulb-type lectin domain;Serine/threonine- / dual specificity protein kinase, catalytic domain;Serine/threonine-protein kinase, active site;Protein kinase-like domain;PAN-2 domain;Concanavalin A-like lectin/glucanase, subgroup;Tyrosine-protein kinase, catalytic domain	-0.67534	0.908159	-4.01717	0.0116826	-2.6717	0.0476687		b	c	bc
BnaC08g18810D	no data	-0.652245	0.885873	-1.75445	0.00852795	-0.122674	0.87801		b		b
BnaA05g25770D	Amino acid/polyamine transporter I	-0.0810525	0.972405	-0.895612	0.0329516	-0.680694	0.131585		b		b
BnaA04g01880D	Helix-turn-helix type 3;Lambda repressor-like, DNA-binding domain;Multiprotein bridging factor 1, N-terminal	0.699513	0.0877742	0.886296	0.00592464	0.804291	0.00988848		b	c	bc
BnaC06g38000D	Glutathione S-transferase, N-terminal;Glutathione S-transferase, C-terminal-like;Thioredoxin-like fold;Glutathione S-transferase/chloride channel, C-terminal	-0.066702	0.970595	-0.869754	0.011965	-0.297571	0.432663		b		b
BnaC04g44730D	Glycosyl transferase, family 8	-0.32451	0.982241	-2.56344	0.00552439	-2.30999	0.000705248		b	c	bc
BnaC08g22370D	Disease resistance protein;NB-ARC;AAA+ ATPase domain;ATPase, AAA-type, core;ATPase, AAA-type, conserved site;AAA-type ATPase, N-terminal domain	-0.157488	0.942367	-2.13841	0.00357558	-1.56941	0.0242083		b	c	bc
BnaA01g04000D	Peptidase C13, legumain	0.468531	0.786398	-0.989417	0.340692	-1.5545	0.0498328			c	c
BnaC03g45680D	Uncharacterised protein family, basic secretory protein	0.073711	0.973058	-1.81941	0.00255895	-0.575996	0.407611		b		b
BnaA07g03170D	Peptidoglycan-binding Lysin subgroup;Peptidoglycan-binding lysin domain	-0.626992	0.708232	-2.36987	0.0021914	-1.40073	0.0624311		b		b
BnaC04g52160D	no data	0.926418	0.0592004	1.30731	0.000317178	0.432975	0.300469		b		b
BnaA01g31420D	Basic-leucine zipper domain	0.279384	0.847457	0.118458	0.850959	0.675375	0.0256439			c	c
BnaCnng43100D	Inorganic pyrophosphatase	-0.840614	0.134744	-1.33283	0.00144653	-0.124936	0.835469		b		b
BnaC06g42250D	Glycerol-3-phosphate dehydrogenase, NAD-dependent, C-terminal;Glycerol-3-phosphate dehydrogenase, NAD-dependent;6-phosphogluconate dehydrogenase, C-terminal-like;Glycerol-3-phosphate dehydrogenase, NAD-dependent, N-terminal;Dehydrogenase, multihelical;NAD(P)-binding domain;Glycerol-3-phosphate dehydrogenase, NAD-dependent, eukaryotic	-0.552043	0.350202	-1.28002	0.0146023	-0.0609373	0.949711		b		b
BnaA02g31430D	Calmodulin binding protein-like	1.89323	0.778728	-6.07943	3.30398e-05	-4.34521	0.000157923		b	c	bc
BnaC02g13250D	Glycoside hydrolase, family 17;X8;Glycoside hydrolase, catalytic domain;Glycoside hydrolase, superfamily	-0.714537	0.76574	-0.882918	0.0174794	-1.3059	4.54612e-05		b	c	bc
BnaC09g01160D	Light regulated Lir1	1.48693	0.00543317	3.36339	1.52137e-11	2.55859	7.72798e-08	a	b	c	abc
BnaC03g22030D	Mannose-binding lectin	-0.119022	0.940041	0.728262	0.61297	2.39318	0.00552367			c	c
BnaA06g13430D	Thaumatin	-0.359908	0.942325	-9.25073	0.000177138	-4.90588	0.0168221		b	c	bc
BnaC01g42710D	no data	0.90043	0.531026	-1.76356	0.00986655	-1.55361	0.122162		b		b
BnaC09g31430D	Translation initiation factor SUI1	0.654337	0.449509	0.638951	0.124388	0.985197	0.0036604			c	c
BnaC03g44790D	no data	0.726374	0.289535	0.981827	0.00255331	0.329621	0.387072		b		b
BnaC08g45150D	no data	1.22491	0.885348	-2.93058	0.00225462	0.243081	0.736827		b		b
BnaA03g38060D	Glycine rich protein	-0.294998	0.979221	0.137115	0.965094	4.53567	9.18447e-05			c	c
BnaA07g22360D	Glycerophosphoryl diester phosphodiesterase;PLC-like phosphodiesterase, TIM beta/alpha-barrel domain	0.104277	0.970595	-2.78408	0.00486938	-2.41222	0.00765683		b	c	bc
BnaA07g14980D	no data	0.0213783	0.997457	-0.211136	0.840364	-1.3131	0.0122676			c	c
BnaC06g27230D	Protein kinase, catalytic domain;S-locus glycoprotein;Serine-threonine/tyrosine-protein kinase catalytic domain;Bulb-type lectin domain;Serine/threonine- / dual specificity protein kinase, catalytic domain;Apple-like;Serine/threonine-protein kinase, active site;Protein kinase-like domain;PAN-2 domain;Concanavalin A-like lectin/glucanase, subgroup;Protein kinase, ATP binding site;Tyrosine-protein …	-0.12503	0.987295	-5.89692	5.41115e-05	-4.01837	0.00184552		b	c	bc
BnaAnng02750D	Protein phosphatase 2C (PP2C)-like;Protein phosphatase 2C	0.481688	0.516562	0.242241	0.821318	2.1195	2.45816e-05			c	c
BnaCnng47330D	UDP-glucuronosyl/UDP-glucosyltransferase	-0.219137	0.858272	-1.5491	0.00530155	-0.985475	0.0772822		b		b
BnaC03g26890D	Protein of unknown function DUF581	0.549011	0.724431	0.855492	0.143615	1.69981	8.87021e-05			c	c
BnaA03g16390D	no data	-0.3702	0.940835	-0.003035	0.998326	1.47786	0.0403353			c	c
BnaC08g37810D	Synaptojanin, N-terminal	-0.528473	0.776491	-1.76576	0.0369906	-0.870701	0.311902		b		b
BnaC09g02710D	Calcium-binding EF-hand;EF-hand-like domain;EF-Hand 1, calcium-binding site	-0.868022	0.655463	-2.23963	0.000159588	-0.561946	0.409086		b		b
BnaCnng36200D	Tetratricopeptide-like helical	-0.709837	0.595306	-0.999562	0.0437463	0.641105	0.188795		b		b
BnaA08g17380D	Domain of unknown function DUF221	-0.794823	0.704526	0.201974	0.857391	1.14388	0.0368732			c	c
BnaC04g45660D	Multicopper oxidase, type 1;Multicopper oxidase, copper-binding site;Cupredoxin;Multicopper oxidase, type 2;Multicopper oxidase, type 3;Laccase	0.373842	0.738135	-0.537243	0.486637	-1.42626	0.023429			c	c
BnaA01g03820D	no data	-0.180016	0.981255	-4.2425	0.000661587	-2.35236	0.0364251		b	c	bc
BnaC02g46580D	no data	-0.270961	0.962635	-1.05309	0.102313	1.05972	0.0429866			c	c
BnaA09g03720D	Zinc finger, RING-type;Zinc finger, RING/FYVE/PHD-type	1.12809	0.42724	-1.01758	0.0177999	-0.797321	0.0531164		b		b
BnaA01g16530D	Plastocyanin-like;Cupredoxin	0.127694	0.964399	0.890593	0.0730561	1.92109	1.74964e-06			c	c
BnaA08g25330D	Protein kinase, catalytic domain;S-locus glycoprotein;Bulb-type lectin domain;Serine/threonine- / dual specificity protein kinase, catalytic domain;Apple-like;Serine/threonine-protein kinase, active site;Protein kinase-like domain;PAN-2 domain;Concanavalin A-like lectin/glucanase, subgroup;Tyrosine-protein kinase, catalytic domain	-0.298683	0.756358	-1.52706	0.0449964	-1.59948	0.0212898		b	c	bc
BnaA07g38390D	Bulb-type lectin domain;PAN-2 domain	-1.11292	0.366366	-2.77545	1.7312e-09	-3.09493	1.01626e-12		b	c	bc
BnaA06g14550D	Protein kinase, catalytic domain;Serine/threonine- / dual specificity protein kinase, catalytic domain;Serine/threonine-protein kinase, active site;Protein kinase-like domain;Concanavalin A-like lectin/glucanase, subgroup;Protein kinase, ATP binding site;Tyrosine-protein kinase, catalytic domain	0.854552	0.0217179	0.747627	0.195544	0.24996	0.765933	a			a
BnaC06g43390D	Zinc finger, Dof-type	-0.158253	0.959283	-1.24374	0.000833986	-1.00755	0.00617518		b	c	bc
BnaA10g11810D	Protein kinase, catalytic domain;Serine-threonine/tyrosine-protein kinase catalytic domain;Serine/threonine- / dual specificity protein kinase, catalytic domain;Protein kinase-like domain;Concanavalin A-like lectin/glucanase, subgroup;Tyrosine-protein kinase, catalytic domain	-0.59956	0.857744	-3.98198	0.00155263	-2.59243	0.0275093		b	c	bc
BnaC03g17770D	Protein kinase, catalytic domain;Serine-threonine/tyrosine-protein kinase catalytic domain;Ankyrin repeat;Serine/threonine- / dual specificity protein kinase, catalytic domain;Serine/threonine-protein kinase, active site;Protein kinase-like domain;Integrin-linked protein kinase;Tyrosine-protein kinase, catalytic domain;Ankyrin repeat-containing domain	-0.515055	0.706785	-1.40012	0.0223544	-1.01201	0.0861432		b		b
BnaCnng10770D	Late embryogenesis abundant protein, LEA-14	0.137355	0.991796	-3.1106	0.00146641	-2.04384	0.0213405		b	c	bc
BnaA05g36120D	Glycosyl hydrolase, family 13, catalytic domain;Alpha-amylase, C-terminal all beta;Glycosyl hydrolase, family 13, subfamily, catalytic domain;Glycosyl hydrolase, family 13, all-beta;Glycoside hydrolase, catalytic domain;Immunoglobulin-like fold;Immunoglobulin E-set;Glycoside hydrolase, family 13;Glycoside hydrolase, superfamily	0.276738	0.749687	0.708637	0.139798	-0.974325	0.0184836			c	c
BnaCnng16230D	no data	0.2051	0.843537	0.395492	0.383752	0.763952	0.0202634			c	c
BnaC09g50030D	no data	-1.31989	0.868651	-3.88996	0.00132944	-2.30708	0.0132821		b	c	bc
BnaC09g09850D	S-locus glycoprotein;Bulb-type lectin domain;Apple-like;PAN-2 domain	-0.178729	0.944852	-1.98237	0.00345911	-1.06853	0.117358		b		b
BnaC08g13660D	Germin;Cupin 1;RmlC-like cupin domain;RmlC-like jelly roll fold;Germin, manganese binding site	-0.380987	0.915945	-2.62146	0.000249505	-0.928793	0.2142		b		b
BnaC01g13420D	Phosphoadenosine phosphosulphate reductase;Thioredoxin-independent 5'-adenylylsulphate reductase;Thioredoxin-like fold;Thioredoxin domain;Rossmann-like alpha/beta/alpha sandwich fold	0.526086	0.655463	-1.75242	0.000128686	0.349891	0.53156		b		b
BnaA09g55410D	Pectinesterase, catalytic;Pectin lyase fold/virulence factor;Pectin lyase fold;Pectinesterase, active site	-0.639125	0.678269	-1.79362	0.000743811	-2.6357	3.9277e-07		b	c	bc
BnaA04g13570D	DNA-binding WRKY;Zn-cluster domain	-0.0590923	0.989973	-2.17843	0.00170445	-1.19035	0.0802808		b		b
BnaA08g14220D	Aconitase A/isopropylmalate dehydratase small subunit, swivel;Aconitase/3-isopropylmalate dehydratase large subunit, alpha/beta/alpha;Aconitase/iron regulatory protein 2;Aconitase/3-isopropylmalate dehydratase, swivel;Aconitase/3-isopropylmalate dehydratase large subunit, alpha/beta/alpha, subdomain 1/3;Aconitase/3-isopropylmalate dehydratase large subunit, alpha/beta/alpha, subdomain 2;Aconitase…	-0.0323775	0.995372	-4.00939	5.99652e-05	-2.70753	0.00318144		b	c	bc
BnaC03g16740D	DNA-binding WRKY	0.934707	0.872919	-3.58675	0.0202543	-3.31627	0.0114392		b	c	bc
BnaA08g24900D	Proton-dependent oligopeptide transporter family;Major facilitator superfamily domain, general substrate transporter;PTR2 family proton/oligopeptide symporter, conserved site	-1.89681	3.3966e-10	-3.38168	6.84184e-16	-1.77345	8.12567e-06	a	b	c	abc
BnaC01g14630D	Protein kinase, catalytic domain;Serine-threonine/tyrosine-protein kinase catalytic domain;Serine/threonine- / dual specificity protein kinase, catalytic domain;Gnk2-homologous domain;Serine/threonine-protein kinase, active site;Protein kinase-like domain;Concanavalin A-like lectin/glucanase, subgroup;Tyrosine-protein kinase, catalytic domain	-1.16997	0.423828	-4.2562	0.0012743	-3.79743	0.00155315		b	c	bc
BnaA06g34070D	PAS domain;PAS-associated, C-terminal;PAC motif	0.715412	0.493852	1.70652	0.00116881	2.06326	2.38419e-05		b	c	bc
BnaA02g35860D	Protein kinase, catalytic domain;Serine/threonine- / dual specificity protein kinase, catalytic domain;Serine/threonine-protein kinase, active site;Protein kinase-like domain;Protein kinase, ATP binding site;Tyrosine-protein kinase, catalytic domain	1.28488	0.154101	-2.07947	0.000223906	-1.16128	0.0415657		b	c	bc
BnaC08g13060D	no data	-0.127241	1	-5.60082	0.000654186	-2.04988	0.00339		b	c	bc
BnaA06g14180D	ER lumen protein retaining receptor	1.09965	0.618121	-4.06121	0.000379358	-1.82162	0.0991914		b		b
BnaC05g37230D	Peptidase T2, asparaginase 2	-2.93065	0.227786	-5.75278	0.00645155	-7.25162	6.69257e-05		b	c	bc
BnaC04g35770D	DNA-binding WRKY;Zn-cluster domain	0.0999125	0.987745	-1.41342	0.0431889	-0.674098	0.330481		b		b
BnaA01g10690D	Calcium-binding EF-hand;EF-hand-like domain;EF-Hand 1, calcium-binding site	-2.39735	0.268564	-4.02993	0.00775068	-4.36088	0.00207554		b	c	bc
BnaA07g09800D	Spermidine/spermine synthases family	-0.513286	0.782699	0.447376	0.657357	1.33252	0.0177868			c	c
BnaC05g20560D	AP2/ERF domain;B3 DNA binding domain;DNA-binding pseudobarrel domain;DNA-binding, integrase-type	0.607139	0.89545	-1.75667	0.0582481	-2.28496	0.00272729			c	c
BnaA06g07630D	Cytochrome P450;Cytochrome P450, E-class, group I;Cytochrome P450, conserved site	-0.449104	0.593912	-0.0446543	0.967009	-1.41152	0.00144188			c	c
BnaA04g00950D	Cytochrome P450;Cytochrome P450, E-class, group I;Cytochrome P450, conserved site	-2.00218	0.777936	-6.88265	6.58907e-05	-4.17976	0.00193254		b	c	bc
BnaC03g39820D	Universal stress protein A;UspA;Rossmann-like alpha/beta/alpha sandwich fold	-0.0416929	0.994476	0.12604	0.909359	1.74795	9.24215e-05			c	c
BnaA07g19210D	ABC transporter, transmembrane domain;ABC transporter-like;AAA+ ATPase domain;ABC transporter, transmembrane domain, type 1;ABC transporter, conserved site;ABC transporter, integral membrane type 1	-0.259167	0.959476	-2.62413	0.00109356	-2.86415	0.000121768		b	c	bc
BnaA10g21990D	Small GTPase superfamily;Ran GTPase;Small GTPase superfamily, Rho type;Small GTPase superfamily, Rab type;Small GTP-binding protein domain;Small GTPase superfamily, Ras type	-0.661529	0.358027	-1.01648	0.00397846	-0.36033	0.355851		b		b
BnaC03g04790D	GTP binding domain;GTP-binding protein, ribosome biogenesis, YsxC	0.502006	0.526197	0.950769	0.0129154	0.236845	0.610322		b		b
BnaA03g40290D	Sugar/inositol transporter;General substrate transporter;Sugar transporter, conserved site;Major facilitator superfamily domain, general substrate transporter;Major facilitator superfamily domain	-0.0621967	0.990672	-2.27645	0.000731497	-2.80243	6.29039e-06		b	c	bc
BnaA01g12320D	Trehalose-phosphatase;HAD-superfamily hydrolase, subfamily IIB;HAD-like domain	-1.26657	0.579353	-2.53913	0.000259154	0.42935	0.603713		b		b
BnaC02g01400D	Diacylglycerol kinase, accessory domain;Diacylglycerol kinase, catalytic domain;Protein kinase C-like, phorbol ester/diacylglycerol binding	-0.542197	0.75532	0.330152	0.563343	1.31739	7.5454e-05			c	c
BnaC03g49190D	Acyl-CoA oxidase, C-terminal;Acyl-CoA oxidase/dehydrogenase, type 1;Acyl-CoA oxidase/dehydrogenase, central domain;Acyl-CoA dehydrogenase/oxidase C-terminal;Acyl-CoA dehydrogenase/oxidase;Acyl-CoA oxidase	0.446351	0.556259	-0.729016	0.0369917	-0.169288	0.706045		b		b
BnaC05g31440D	Protein kinase, catalytic domain;Serine/threonine- / dual specificity protein kinase, catalytic domain;Serine/threonine-protein kinase, active site;Protein kinase-like domain;Protein kinase, ATP binding site;Tyrosine-protein kinase, catalytic domain	0.0334388	0.995809	0.999337	0.0337415	1.14348	0.00708781		b	c	bc
BnaA03g13900D	Protein kinase, catalytic domain;Serine/threonine- / dual specificity protein kinase, catalytic domain;NAF domain;Serine/threonine-protein kinase, active site;Protein kinase-like domain;Protein kinase, ATP binding site;NAF/FISL domain;Tyrosine-protein kinase, catalytic domain;Calcium/calmodulin-dependent/calcium-dependent protein kinase	0.898028	0.262141	1.60544	0.000715455	2.42133	1.16312e-08		b	c	bc
BnaC06g29750D	Protein of unknown function DUF677	-0.123352	1	-3.45394	0.00108394	-1.65734	0.0045016		b	c	bc
BnaA03g11820D	RNA recognition motif domain;Nucleotide-binding, alpha-beta plait	-0.145367	0.92674	-0.362434	0.589767	-1.13243	0.00704968			c	c
BnaA01g01220D	no data	3.10338	0.598298	-2.40211	0.0458992	-0.984886	0.380367		b		b
BnaC03g07620D	no data	-0.401838	0.774428	-0.635951	0.599299	-1.97329	0.0221108			c	c
BnaC04g31840D	Helicase, C-terminal;Ribosomal protein S4/S9, N-terminal;RNA-binding S4 domain;Ribosomal protein S4/S9, eukaryotic/archaeal;Helicase, superfamily 1/2, ATP-binding domain;Ribosomal protein S4, conserved site;Mitochondrial degradasome RNA helicase subunit, C-terminal domain	-0.133772	0.938024	1.19224	0.0304508	0.718452	0.195268		b		b
BnaC03g00680D	Protein kinase, catalytic domain;Serine-threonine/tyrosine-protein kinase catalytic domain;Serine/threonine- / dual specificity protein kinase, catalytic domain;Serine/threonine-protein kinase, active site;Protein kinase-like domain;Protein kinase, ATP binding site;Tyrosine-protein kinase, catalytic domain	-0.151964	0.942889	-1.7338	0.0180532	-0.972382	0.182217		b		b
BnaCnng14300D	Chlorophyll A-B binding protein;Chlorophyll a/b binding protein domain	-0.765949	0.0924657	-1.61637	5.85531e-06	-0.413494	0.314729		b		b
BnaC05g11500D	ABC transporter-like;AAA+ ATPase domain;ABC-2 type transporter;Plant PDR ABC transporter associated	0.123242	0.991972	-5.36343	0.00122171	-3.63404	0.0094616		b	c	bc
BnaA06g34450D	Metallophosphoesterase domain	0.147463	0.930393	1.19563	0.0236571	1.85259	5.57694e-05		b	c	bc
BnaA09g09710D	no data	-2.19281	0.621666	-4.53836	0.000984243	-4.44437	0.000140919		b	c	bc
BnaA09g07460D	Armadillo;U box domain;Armadillo-like helical;Zinc finger, RING/FYVE/PHD-type;Armadillo-type fold	-0.021223	1	-2.73123	0.00743141	-1.85366	0.048165		b	c	bc
BnaC01g16530D	EGF-like, alliinase;Allinase, C-terminal;Pyridoxal phosphate-dependent transferase, major region, subdomain 1;Pyridoxal phosphate-dependent transferase, major region, subdomain 2;Pyridoxal phosphate-dependent transferase	-0.271625	0.90225	0.170606	0.91106	1.88188	0.0086331			c	c
BnaC07g30300D	DNA-binding WRKY	-3.32753	0.17382	-5.73925	0.000653206	-2.61987	0.0621922		b		b
BnaAnng25870D	NAD-dependent epimerase/dehydratase;NAD(P)-binding domain	-0.0238406	0.995814	-1.15778	0.0321895	-0.314409	0.621785		b		b
BnaA03g39920D	RNA recognition motif domain;Nucleotide-binding, alpha-beta plait	-0.0718564	0.976046	-0.435438	0.470122	-1.33243	0.000800837			c	c
BnaC02g24920D	UDP-glucuronosyl/UDP-glucosyltransferase	0.377279	0.809591	1.15587	0.0736908	1.65871	0.00195316			c	c
BnaA09g48160D	Signal transduction response regulator, receiver domain;CheY-like superfamily	-0.756314	0.264166	-0.549749	0.409771	-1.36394	0.00337845			c	c
BnaC02g06770D	Peptidase S10, serine carboxypeptidase	-1.36137	2.8116e-06	-1.04502	0.0814554	-0.097874	0.902501	a			a
BnaCnng74920D	Domain of unknown function DUF125, transmembrane	-0.862379	0.734868	-2.95778	1.29764e-05	-3.30997	5.28605e-08		b	c	bc
BnaA08g10610D	Protein kinase, catalytic domain;Serine-threonine/tyrosine-protein kinase catalytic domain;Serine/threonine- / dual specificity protein kinase, catalytic domain;Gnk2-homologous domain;Serine/threonine-protein kinase, active site;Protein kinase-like domain;Concanavalin A-like lectin/glucanase, subgroup;Protein kinase, ATP binding site;Tyrosine-protein kinase, catalytic domain	-0.102303	0.984866	-4.94628	0.000528162	-4.05824	0.00141022		b	c	bc
BnaA03g47030D	TB2/DP1/HVA22-related protein	-0.614492	0.386764	1.1656	0.357312	4.31955	4.41227e-07			c	c
BnaA09g18210D	AP2/ERF domain;DNA-binding, integrase-type	1.47057	0.492762	-1.27904	0.0267607	-0.456528	0.467752		b		b
BnaC07g10320D	Glutaredoxin;Glutaredoxin-like, plant II;Thioredoxin-like fold	1.88516	0.602921	-3.7659	0.00993482	-2.34591	0.0506998		b		b
BnaC09g39990D	Proteinase inhibitor I25, cystatin;Proteinase inhibitor I25, cystatin, conserved region;Cystatin	0.208908	0.953638	0.107985	0.945543	1.50478	0.0144024			c	c
BnaC07g33110D	Uncharacterised protein family UPF0497, trans-membrane plant subgroup;Uncharacterised protein family UPF0497, trans-membrane plant	0.714689	0.937797	-4.0556	0.107714	-6.21514	0.00396878			c	c
BnaC05g45090D	Aminoglycoside phosphotransferase;Acyl-CoA oxidase/dehydrogenase, type 1;Acyl-CoA oxidase/dehydrogenase, central domain;Acyl-CoA dehydrogenase, N-terminal;Acyl-CoA dehydrogenase/oxidase C-terminal;Acyl-CoA dehydrogenase/oxidase;Protein kinase-like domain;Acyl-CoA dehydrogenase/oxidase, N-terminal	0.202462	0.811673	0.589233	0.0892298	0.720981	0.0158468			c	c
BnaC05g43350D	SANT/Myb domain;Myb domain, plants;Homeodomain-like;Myb domain	-0.321427	0.630136	-1.19791	1.38874e-05	-0.693356	0.0126912		b	c	bc
BnaA02g12620D	Protein kinase, catalytic domain;Serine-threonine/tyrosine-protein kinase catalytic domain;Serine/threonine- / dual specificity protein kinase, catalytic domain;Serine/threonine-protein kinase, active site;Protein kinase-like domain;Protein kinase, ATP binding site;Tyrosine-protein kinase, catalytic domain;Wall-associated receptor kinase galacturonan-binding domain	-0.382704	0.745899	-2.98232	0.000220234	-1.72652	0.0239199		b	c	bc
BnaA03g07130D	Bulb-type lectin domain;PAN-2 domain	-1.08669	0.469779	-1.96971	0.0312849	-1.3938	0.114323		b		b
BnaA01g37160D	Prenylated rab acceptor PRA1	0.420131	0.967827	-3.74261	0.003244	-2.54522	0.0208035		b	c	bc
BnaA07g24020D	Glutathione S-transferase, N-terminal;Glutathione S-transferase, C-terminal;Glutathione S-transferase, C-terminal-like;Thioredoxin-like fold;Glutathione S-transferase/chloride channel, C-terminal	-1.56453	0.794513	-2.3237	0.0802462	-2.0679	0.0367717			c	c
BnaAnng40670D	Phox/Bem1p	0.509823	0.774877	-1.19767	0.0182711	-0.339226	0.551988		b		b
BnaC06g34470D	Protein kinase, catalytic domain;Serine-threonine/tyrosine-protein kinase catalytic domain;Serine/threonine- / dual specificity protein kinase, catalytic domain;Serine/threonine-protein kinase, active site;Protein kinase-like domain;Protein kinase, ATP binding site;Tyrosine-protein kinase, catalytic domain;Serine/threonine-protein kinase CTR1;Armadillo repeat-containing protein 3 and Serine/threo…	-0.919849	0.0017727	-1.73546	1.5819e-08	-2.0008	3.12191e-12	a	b	c	abc
BnaC05g02100D	no data	-0.107317	0.94547	-0.0274086	0.983877	-1.41399	0.00503529			c	c
BnaA05g22450D	Protein of unknown function DUF760	0.0307339	0.990601	0.270945	0.771911	1.18838	0.0175511			c	c
BnaCnng44880D	no data	-1.82035	0.139457	-6.64906	9.64273e-05	-5.81634	0.000147085		b	c	bc
BnaC06g08930D	AMP-dependent synthetase/ligase;AMP-binding, conserved site;Domain of unknown function DUF4009	1.07391	0.000846203	0.630877	0.146246	1.17663	0.000664069	a		c	ac
BnaA10g22230D	no data	0.00168681	1	-1.09011	0.0308074	-0.792534	0.0825293		b		b
BnaA07g27660D	ACT domain	-0.620521	0.334054	-0.370752	0.763239	-2.05855	0.00602931			c	c
BnaA10g11660D	no data	-0.36106	0.930407	0.852896	0.177024	1.74326	0.000108023			c	c
BnaA06g13250D	Tify;CO/COL/TOC1, conserved site	-1.59448	0.734957	-2.66528	0.00273869	-1.51848	0.0653679		b		b
BnaCnng25150D	WD40 repeat;WD40/YVTN repeat-like-containing domain;WD40-repeat-containing domain;WD40 repeat, conserved site;G-protein beta WD-40 repeat	0.3245	0.775349	-1.56508	0.0099081	-1.01256	0.0878507		b		b
BnaA06g25580D	Peptidase A1;Peptidase aspartic, active site;Aspartic peptidase	-0.467513	0.521371	-2.48696	4.15839e-05	-1.95914	0.000627101		b	c	bc
BnaA03g60150D	Protein kinase, catalytic domain;S-locus glycoprotein;Serine-threonine/tyrosine-protein kinase catalytic domain;Bulb-type lectin domain;Serine/threonine- / dual specificity protein kinase, catalytic domain;Apple-like;Serine/threonine-protein kinase, active site;Protein kinase-like domain;PAN-2 domain;Concanavalin A-like lectin/glucanase, subgroup;Protein kinase, ATP binding site;Tyrosine-protein …	-1.74268	0.564202	-2.8416	0.00915515	-2.34956	0.0143602		b	c	bc
BnaA02g16100D	RNA helicase, ATP-dependent, DEAD-box, conserved site;Helicase, C-terminal;DNA/RNA helicase, DEAD/DEAH box type, N-terminal;Helicase, superfamily 1/2, ATP-binding domain;RNA helicase, DEAD-box type, Q motif	-0.364736	0.734957	-0.162436	0.92429	-1.79997	0.0203509			c	c
BnaC04g09330D	Homeodomain;POX;Homeobox KN domain;Homeodomain-like	-0.413301	0.512393	-1.33776	0.0210562	-1.07146	0.0557662		b		b
BnaC01g03890D	Glycoside hydrolase, family 17;X8;Glycoside hydrolase, catalytic domain;Glycoside hydrolase, superfamily	-0.222904	0.854124	-1.13646	0.0630482	-1.1697	0.0305047			c	c
BnaA05g32390D	no data	-0.127771	0.926101	1.02564	0.0469229	0.867875	0.0701471		b		b
BnaA01g06490D	Proteolipid membrane potential modulator	0.746814	0.716635	0.427958	0.41723	1.16444	0.000841032			c	c
BnaA02g36380D	Domain of unknown function DUF4308	-0.212996	0.842137	-0.930004	0.037054	-0.709155	0.0934017		b		b
BnaA08g19050D	Armadillo;U box domain;Armadillo-like helical;Zinc finger, RING/FYVE/PHD-type;Armadillo-type fold	-0.735936	0.765375	0.0421194	0.976786	1.39498	0.00882613			c	c
BnaCnng00330D	Protein kinase, catalytic domain;AGC-kinase, C-terminal;Serine/threonine- / dual specificity protein kinase, catalytic domain;Serine/threonine-protein kinase, active site;Protein kinase-like domain;Tyrosine-protein kinase, catalytic domain	0.717028	0.861414	-2.22852	0.000934951	0.00657322	0.994272		b		b
BnaC07g06590D	no data	0.280614	0.786478	-0.247963	0.797301	-1.12867	0.0232992			c	c
BnaC08g10650D	no data	-0.0323589	1	-2.78141	0.00839026	-1.79386	0.0280285		b	c	bc
BnaA09g41150D	Carotenoid oxygenase	0.841152	0.835002	-1.2419	0.271716	-1.81775	0.0341624			c	c
BnaA07g18170D	Glycosyl transferase, family 48;1,3-beta-glucan synthase subunit FKS1-like, domain-1;Callose synthase	-0.240146	0.862889	-0.771329	0.0197632	0.0614338	0.895378		b		b
BnaA03g53440D	Protein kinase, catalytic domain;Serine-threonine/tyrosine-protein kinase catalytic domain;Serine/threonine- / dual specificity protein kinase, catalytic domain;Serine/threonine-protein kinase, active site;Protein kinase-like domain;Concanavalin A-like lectin/glucanase, subgroup;Protein kinase, ATP binding site;Tyrosine-protein kinase, catalytic domain	-0.350375	0.854124	-1.72352	0.000362609	-0.100677	0.886482		b		b
BnaA03g37730D	no data	0.0985724	0.991855	-3.92596	0.00142743	-2.63686	0.0173669		b	c	bc
BnaC09g53440D	Protein of unknown function DUF761, plant	-0.335805	0.776491	0.123786	0.886655	1.41726	6.85929e-05			c	c
BnaC01g27190D	Phloem protein 2-like	3.05829	0.405682	0.225564	0.910443	1.56187	0.0477973			c	c
BnaA03g50240D	Glutamine amidotransferase type 1	-1.13905	0.305686	0.34187	0.629078	1.32122	0.000836725			c	c
BnaC09g40660D	SANT/Myb domain;Myb domain, plants;Homeodomain-like;Myb domain	-0.762744	0.628341	-1.23718	0.0231413	-0.160754	0.824109		b		b
BnaA04g27950D	Protein kinase, catalytic domain;Serine/threonine- / dual specificity protein kinase, catalytic domain;Serine/threonine-protein kinase, active site;Protein kinase-like domain;Concanavalin A-like lectin/glucanase, subgroup;Protein kinase, ATP binding site;Tyrosine-protein kinase, catalytic domain	-0.729734	0.873998	-3.178	0.0124682	-2.26045	0.0574742		b		b
BnaC04g21200D	C2 calcium-dependent membrane targeting;C2 calcium/lipid-binding domain, CaLB;C2 membrane targeting protein	-1.94814	0.625476	-4.49855	0.00337258	-4.30548	0.0043148		b	c	bc
BnaC06g36170D	Protein kinase, catalytic domain;Leucine-rich repeat;Serine/threonine- / dual specificity protein kinase, catalytic domain;Leucine-rich repeat, typical subtype;Serine/threonine-protein kinase, active site;Protein kinase-like domain;Leucine-rich repeat-containing N-terminal, type 2;Concanavalin A-like lectin/glucanase, subgroup;Protein kinase, ATP binding site;Tyrosine-protein kinase, catalytic do…	0.366974	0.909144	0.0966308	0.928277	1.00784	0.016989			c	c
BnaA04g19120D	Protein-tyrosine phosphatase, SIW14-like;Protein-tyrosine phosphatase, active site;Protein-tyrosine phosphatase, dual specificity phosphatase, eukaryotic	-0.232897	0.893672	-2.07162	0.00120789	-1.89398	0.00475254		b	c	bc
BnaC04g06970D	Ribosomal protein S17;Nucleic acid-binding, OB-fold;Ribosomal protein S17, conserved site	0.285356	0.781779	0.737468	0.160648	1.13029	0.00663937			c	c
BnaC06g02060D	Zinc finger, RanBP2-type	0.0675148	0.96559	0.711483	0.0387278	-0.792654	0.0154645		b	c	bc
BnaC02g03130D	Heavy metal-associated domain, HMA	0.311738	0.908649	-0.658044	0.516857	-1.35721	0.0489112			c	c
BnaA02g34070D	Plant peroxidase;Haem peroxidase, plant/fungal/bacterial;Haem peroxidase;Peroxidases heam-ligand binding site;Peroxidase, active site	-0.956455	0.89912	-4.46952	0.00266656	-1.98273	0.14617		b		b
BnaC03g60540D	Ribonucleotide reductase large subunit, C-terminal;ATP-cone;Ribonucleotide reductase R1 subunit, N-terminal;Ribonucleotide reductase, class I , alpha subunit;Ribonucleotide reductase large subunit, N-terminal	-0.135292	0.937755	-0.703406	0.516857	-1.52029	0.037124			c	c
BnaC08g26600D	no data	-1.94226	0.00886212	-3.92696	0.00951894	-2.23365	0.161447	a	b		ab
BnaC04g14770D	Protein kinase, catalytic domain;Serine/threonine- / dual specificity protein kinase, catalytic domain;Serine/threonine-protein kinase, active site;Protein kinase-like domain;Protein kinase, ATP binding site;Tyrosine-protein kinase, catalytic domain	0.10718	0.986008	0.0161636	0.993621	1.60174	0.0281515			c	c
BnaC02g45000D	PAR1	-0.23561	0.961111	-4.44822	0.000514935	-1.07548	0.425257		b		b
BnaC07g25010D	Zinc finger, AN1-type	0.790752	0.848427	-2.73998	0.0572386	-2.5888	0.0261923			c	c
BnaC09g11030D	AMP-dependent synthetase/ligase;AMP-binding, conserved site	-0.251228	0.883673	-2.61901	0.0089899	-2.71812	0.00197364		b	c	bc
BnaA09g19740D	LURP1-like domain;Tubby C-terminal-like domain	-0.185243	0.982047	-9.29979	5.83027e-05	-4.30322	0.0258722		b	c	bc
BnaC06g15920D	Protein of unknown function DUF3133	0.244278	0.93587	-1.40102	0.0516863	-1.84255	0.00326032			c	c
BnaC07g30200D	Phosphatidylinositol 3-/4-kinase, catalytic domain;Ubiquitin;Protein kinase-like domain;Ubiquitin supergroup	-0.181873	0.940498	-1.99851	0.00244003	-1.33125	0.0416606		b	c	bc
BnaA09g04520D	BURP domain	-0.481469	0.542291	1.07003	0.0861893	2.08903	3.63813e-05			c	c
BnaC04g45750D	no data	-0.515774	0.78482	-1.88407	3.17083e-05	-0.220356	0.703897		b		b
BnaA07g11250D	Zinc finger, RING-type;Zinc finger, RING/FYVE/PHD-type	0.234976	0.956959	0.252895	0.843707	1.2594	0.0360105			c	c
BnaUnng00680D	Zinc finger, BED-type predicted;HAT dimerisation;Ribonuclease H-like domain;Domain of unknown function DUF4413	-0.107976	0.94547	-0.301525	0.681977	-1.53418	0.00010694			c	c
BnaC03g72030D	no data	1.70698	0.728956	-2.24515	0.258955	-4.79859	0.0017439			c	c
BnaC08g14540D	Pyruvate phosphate dikinase, PEP/pyruvate-binding;ATP-grasp fold, subdomain 1;ATP-grasp fold, subdomain 2	0.281124	0.656462	0.934551	0.0978522	1.67623	0.000239334			c	c
BnaA02g12230D	Late embryogenesis abundant protein, LEA-14	-3.67255	0.341398	-5.66519	0.00275434	-2.8083	0.00828556		b	c	bc
BnaA03g21390D	DNA-binding WRKY	-0.105405	1	-2.94306	0.0895043	-4.92518	0.00132846			c	c
BnaC07g10790D	no data	0.219983	0.974612	-1.63457	0.000610518	-0.532288	0.263468		b		b
BnaA02g27290D	Sulfotransferase domain	-0.930893	0.797511	-5.37686	0.000279958	-6.36483	4.63263e-06		b	c	bc
BnaC07g44370D	Disease resistance protein;NB-ARC	-0.635312	0.548374	-1.80671	0.00314656	-1.12824	0.0629021		b		b
BnaA03g00570D	Transmembrane receptor, eukaryota	-0.822333	0.672875	-1.79126	0.00302992	-1.3479	0.0149842		b	c	bc
BnaCnng35440D	Glutathione S-transferase, N-terminal;Glutathione S-transferase, C-terminal-like;Thioredoxin-like fold;Glutathione S-transferase/chloride channel, C-terminal	0.00720322	1	-10.322	5.85949e-05	-7.159	0.000273451		b	c	bc
BnaC06g21280D	Alpha crystallin/Hsp20 domain	-0.216361	0.978716	2.70717	0.000110029	4.10773	4.14742e-10		b	c	bc
BnaCnng24780D	SANT/Myb domain;DnaJ domain;Homeodomain-like;Myb-like domain;DnaJ domain, conserved site	-0.159211	0.927801	0.357641	0.77988	2.06727	0.00122527			c	c
BnaC08g24790D	Armadillo-like helical;Nucleotide exchange factor Fes1;Armadillo-type fold	0.938325	0.188796	1.54875	0.000240621	1.27669	0.0021372		b	c	bc
BnaC03g51850D	Exostosin-like	-0.757291	0.0665235	-0.00826542	0.995338	1.30153	0.00692503			c	c
BnaC05g36570D	AP2/ERF domain;DNA-binding, integrase-type	0.510489	0.403555	0.97338	0.202663	1.70125	0.00483051			c	c
BnaA10g23980D	SANT/Myb domain;Homeodomain-like;Myb domain	-0.0984202	0.984599	0.501652	0.625715	1.53465	0.0156273			c	c
BnaA09g52370D	Regulator of chromosome condensation, RCC1;Regulator of chromosome condensation 1/beta-lactamase-inhibitor protein II	0.751811	0.140519	1.17458	0.000322919	0.997464	0.00126304		b	c	bc
BnaC01g29450D	no data	0.655954	0.747328	1.13872	0.442115	3.27103	0.000983391			c	c
BnaA08g23680D	Heat shock protein 70 family;Heat shock protein 70, conserved site	0.753421	0.148093	1.35776	0.000316746	2.5795	3.99108e-14		b	c	bc
BnaAnng29590D	Protein phosphatase 2C (PP2C)-like;Protein phosphatase 2C	0.0999633	0.98394	-1.21774	0.0229125	-0.823149	0.10385		b		b
BnaA05g35560D	Ammonium transporter;Ammonium transporter, conserved site;Ammonium transporter AmtB-like domain	-0.263032	0.794613	-2.05039	0.0289468	-2.27641	0.00572073		b	c	bc
BnaC03g02080D	Protein of unknown function DUF3133	0.151407	0.960015	-1.16167	0.0233778	-1.31189	0.00353965		b	c	bc
BnaA09g21630D	Protein kinase, catalytic domain;Serine/threonine- / dual specificity protein kinase, catalytic domain;Gnk2-homologous domain;Serine/threonine-protein kinase, active site;Concanavalin A-like lectin/glucanase, subgroup;Protein kinase, ATP binding site;Tyrosine-protein kinase, catalytic domain	-1.21361	0.772398	-3.61153	4.7589e-08	-2.40658	1.97412e-05		b	c	bc
BnaA10g25000D	AP2/ERF domain;DNA-binding, integrase-type	1.4038	0.612273	1.70977	0.105445	1.89997	0.0256782			c	c
BnaA05g00710D	SANT/Myb domain;Homeodomain-like;Myb domain	-0.744685	0.940348	-5.43681	0.00349336	-2.24616	0.1533		b		b
BnaC07g22750D	CDP-alcohol phosphatidyltransferase;Choline/ethanolamine phosphotransferase	-0.408497	0.573192	-0.558298	0.111053	-0.774247	0.00704263			c	c
BnaC01g09990D	no data	0.171077	0.995814	-3.86586	0.000902272	-0.963748	0.223388		b		b
BnaC03g74330D	Glycine rich protein	0.366067	0.686876	0.567532	0.270191	1.29667	0.000624055			c	c
BnaC04g38800D	Calcium-binding EF-hand;EF-hand-like domain;EF-Hand 1, calcium-binding site	0.441949	0.953484	-2.62755	0.0023614	-1.59214	0.0106718		b	c	bc
BnaA09g36770D	Peptidase M16, zinc-binding site;Peptidase M16, C-terminal domain;Peptidase M16 domain;Metalloenzyme, LuxS/M16 peptidase-like;Peptidase M16, N-terminal	-0.348258	0.843636	-2.56867	0.013322	-1.07134	0.31462		b		b
BnaC08g40310D	Insecticidal crystal toxin	0.100085	0.994255	-2.953	0.00278346	-3.91614	1.24535e-05		b	c	bc
BnaA02g28080D	Leucine-rich repeat;Leucine-rich repeat, typical subtype	-0.543443	0.94294	-3.92317	0.00152976	-2.97986	0.0081577		b	c	bc
BnaA04g23070D	Alpha/beta hydrolase fold-1;Alpha/beta hydrolase, N-terminal	-0.624331	0.626565	0.335715	0.699396	1.7682	3.66233e-05			c	c
BnaCnng14680D	Short-chain dehydrogenase/reductase SDR;Glucose/ribitol dehydrogenase;NAD(P)-binding domain	2.43608	0.526189	-2.78822	0.0176472	-3.69678	7.95043e-05		b	c	bc
BnaA09g40010D	no data	0.70504	0.118963	0.676899	0.0351741	0.205717	0.576921		b		b
BnaA04g17540D	Peptidase S26A, signal peptidase I;Peptidase S24/S26A/S26B/S26C, beta-ribbon domain;Peptidase S24/S26A/S26B/S26C;Peptidase S26;Peptidase S26A, signal peptidase I, serine active site;Peptidase S26A, signal peptidase I, conserved site	-0.263584	0.845881	-1.5677	0.00203322	-0.791762	0.137909		b		b
BnaA09g20120D	Amidohydrolase 1;Metal-dependent hydrolase, composite domain;Allantoinase	-0.483892	0.462352	-0.883532	0.0366654	-1.25327	0.000762873		b	c	bc
BnaC08g32640D	Glutaredoxin;Glutaredoxin-like, plant II;Thioredoxin-like fold;Glutaredoxin subgroup	-2.00027	0.014826	-3.70927	4.05119e-08	-3.631	2.41076e-09	a	b	c	abc
BnaA08g19870D	Zinc finger, Dof-type	-0.833682	0.579353	-1.3937	0.000324592	-1.53548	5.3858e-05		b	c	bc
BnaA02g16250D	Mannose-binding lectin	-0.822929	0.78482	0.244753	0.797276	1.56715	9.99594e-05			c	c
BnaC04g29380D	Peptidase S10, serine carboxypeptidase;Peptidase S10, serine carboxypeptidase, active site	-0.320563	0.73744	-1.56614	0.0130271	-0.710059	0.291245		b		b
BnaC08g08290D	Rapid ALkalinization Factor	0.328125	0.789604	-0.201056	0.794841	0.91552	0.0227368			c	c
BnaAnng23490D	AP2/ERF domain;DNA-binding, integrase-type	1.49953	0.748916	1.08389	0.196314	1.81637	0.00175301			c	c
BnaA03g19900D	no data	0.768194	0.457677	0.814093	0.163141	-1.12167	0.0420833			c	c
BnaC06g08920D	Protein kinase, catalytic domain;Serine/threonine- / dual specificity protein kinase, catalytic domain;Serine/threonine-protein kinase, active site;Protein kinase-like domain;Tyrosine-protein kinase, catalytic domain	1.08038	0.556547	-1.14466	0.0368089	-0.435391	0.435106		b		b
BnaA06g25060D	Zinc finger, C2H2;Zinc finger, C2H2-like	1.39785	0.819894	-5.41334	4.06229e-06	-3.29485	0.00119857		b	c	bc
BnaC03g00830D	Conserved hypothetical protein CHP01589, plant	2.35288	0.0175641	1.93265	0.134418	1.01804	0.411629	a			a
BnaAnng11680D	Heavy metal-associated domain, HMA	0.00143289	1	-0.855759	0.360889	-1.57675	0.0213495			c	c
BnaC06g43900D	no data	0.211639	0.959283	-1.84313	0.0724056	-2.72131	0.00729856			c	c
BnaC08g27580D	Male sterility, NAD-binding;NAD(P)-binding domain;Fatty acyl-CoA reductase	-0.122101	1	-2.17772	0.295459	-3.59092	0.0132737			c	c
BnaA04g28860D	GNAT domain;Acyl-CoA N-acyltransferase	0.452422	0.960591	-2.56051	0.0206746	-0.589772	0.619902		b		b
BnaA07g22570D	Haem peroxidase, animal;Haem peroxidase	-0.296268	0.862064	0.376474	0.679868	1.28963	0.0131688			c	c
BnaA07g32030D	NmrA-like;NAD(P)-binding domain	0.0512185	0.97967	-0.00207728	0.997259	-0.932313	0.000385792			c	c
BnaA09g03360D	Calcium-binding EF-hand;EF-hand-like domain;EF-Hand 1, calcium-binding site	-0.990209	0.652824	-3.38543	7.78817e-07	-0.714917	0.343264		b		b
BnaC03g60390D	Zinc finger, RING-type;Zinc finger, RING/FYVE/PHD-type	-0.256496	0.872919	-0.764604	0.0672026	-0.886924	0.0137467			c	c
BnaC07g29710D	Cryptochrome/DNA photolyase, class 1;tRNA (guanine-N-7) methyltransferase;DNA photolyase, FAD-binding/Cryptochrome, C-terminal;DNA photolyase, N-terminal;Cryptochrome, DASH;Rossmann-like alpha/beta/alpha sandwich fold;tRNA (guanine-N-7) methyltransferase, eukaryote	-0.869523	0.0374472	-1.02299	0.00488293	-0.544045	0.156951	a	b		ab
BnaC04g20690D	Cation-transporting P-type ATPase;Cation-transporting P-type ATPase, N-terminal;Cation-transporting P-type ATPase, C-terminal;Calcium-transporting P-type ATPase, subfamily IIB;P-type ATPase, A domain;P-type ATPase, phosphorylation site;HAD-like domain;P-type ATPase, transmembrane domain;P-type ATPase, cytoplasmic domain N	-0.899405	0.848427	-6.92671	0.0017864	-5.93087	0.00231398		b	c	bc
BnaA06g15140D	Dehydrogenase, E1 component	0.436807	0.521371	1.278	0.00126417	1.53353	2.92163e-05		b	c	bc
BnaC06g21240D	VHS;GAT;ENTH/VHS;VHS subgroup	0.12703	0.994647	-6.26664	2.85911e-05	-4.13553	0.000820282		b	c	bc
BnaAnng02030D	Dienelactone hydrolase	-0.100725	0.957076	0.926034	0.15614	1.65965	0.00114837			c	c
BnaC08g45810D	Domain of unknown function DUF4033	-0.443223	0.531462	-0.96855	0.0131845	0.157931	0.757079		b		b
BnaA06g14020D	no data	0.291731	0.777725	0.85229	0.0365805	0.568827	0.165623		b		b
BnaC09g07370D	F-box domain, cyclin-like;Leucine-rich repeat, cysteine-containing subtype	0.0406973	0.993241	-1.0649	0.0228875	-0.932542	0.0321311		b	c	bc
BnaC05g37520D	no data	0.0174474	1	0.356482	0.760485	1.22967	0.0213795			c	c
BnaAnng39860D	Photosystem II Pbs27	0.282893	0.756113	0.559936	0.287313	1.08717	0.00590378			c	c
BnaC08g49850D	Glycoside hydrolase, family 28;Parallel beta-helix repeat;Pectin lyase fold/virulence factor;Pectin lyase fold	0.148494	0.976499	1.70332	0.177918	2.57822	0.0199899			c	c
BnaC03g07920D	Leucine-rich repeat;Leucine-rich repeat-containing N-terminal, type 2	-1.00161	0.87085	-6.91601	0.00133926	-3.2958	0.0566306		b		b
BnaA03g32530D	Zinc finger, RING-type;S-ribonuclease binding protein, SBP1, pollen	-0.380599	0.779354	-0.989699	0.0717813	-1.04308	0.0453974			c	c
BnaC01g25960D	O-acyltransferase, WSD1, N-terminal;O-acyltransferase, WSD1, C-terminal	-0.680889	0.273559	-2.44405	0.000854463	-1.42884	0.0465321		b	c	bc
BnaA03g51100D	Hly-III-related	-1.25558	0.648028	-3.38836	0.00154679	-1.8596	0.0519865		b		b
BnaA04g25000D	Calcium-binding EF-hand;EF-hand-like domain;EF-Hand 1, calcium-binding site	-0.426077	0.636767	-0.899358	0.0127442	0.0785995	0.873939		b		b
BnaA03g21440D	no data	0.144018	0.951812	0.909616	0.041015	-0.234603	0.652772		b		b
BnaAnng18410D	Multicopper oxidase, type 1;Multicopper oxidase, copper-binding site;Cupredoxin;Multicopper oxidase, type 2;Multicopper oxidase, type 3;Laccase	-0.240947	0.858472	-1.29345	0.00500904	-1.20698	0.0186945		b	c	bc
BnaA07g38670D	Protein of unknown function DUF707	-0.485583	0.862467	-4.00944	0.00114504	-1.70257	0.152351		b		b
BnaA08g19140D	WD40 repeat;WD40/YVTN repeat-like-containing domain;WD40-repeat-containing domain;G-protein beta WD-40 repeat	-0.779153	0.571831	-2.50481	0.000278106	-1.63994	0.010592		b	c	bc
BnaA10g00330D	Protease-associated domain, PA;Peptidase A22, presenilin signal peptide;Peptidase A22B, signal peptide peptidase	-0.262187	0.869783	0.974303	0.0471877	1.60111	6.83377e-05		b	c	bc
BnaA02g31910D	Zinc finger, RING-type;Rubredoxin-type fold;Zinc finger, CHY-type;Zinc finger, RING/FYVE/PHD-type;Zinc finger, CTCHY-type	-0.27607	0.87703	0.341726	0.772155	1.47562	0.0213495			c	c
BnaC08g16970D	Protein kinase, catalytic domain;Serine/threonine- / dual specificity protein kinase, catalytic domain;Serine/threonine-protein kinase, active site;Protein kinase-like domain;Concanavalin A-like lectin/glucanase, subgroup;Protein kinase, ATP binding site;Tyrosine-protein kinase, catalytic domain	0.168381	0.945174	-1.10608	0.0358573	-0.787889	0.116436		b		b
BnaA04g18520D	Leucine-rich repeat, typical subtype	-2.76778	0.637912	-4.00769	0.00196971	1.32131	0.208604		b		b
BnaA05g00460D	Mitochondrial carrier protein;Mitochondrial substrate/solute carrier;Mitochondrial carrier domain	-0.606423	0.259086	-1.33612	0.00915368	-0.588292	0.295811		b		b
BnaA06g01590D	Short-chain dehydrogenase/reductase SDR;Glucose/ribitol dehydrogenase;NAD(P)-binding domain	0.450681	0.778404	0.716852	0.200376	1.44795	0.00068413			c	c
BnaC05g48860D	Protein kinase, catalytic domain;Serine-threonine/tyrosine-protein kinase catalytic domain;Serine/threonine- / dual specificity protein kinase, catalytic domain;Serine/threonine-protein kinase, active site;Protein kinase-like domain;Tyrosine-protein kinase, catalytic domain	0.583877	0.296776	0.97977	0.0335733	1.17054	0.00471971		b	c	bc
BnaC09g07340D	Armadillo;U box domain;Armadillo-like helical;Zinc finger, RING/FYVE/PHD-type;Armadillo-type fold	-0.382051	0.91733	-4.76922	0.000756136	-3.66447	0.00243321		b	c	bc
BnaA10g04700D	UDP-glucuronosyl/UDP-glucosyltransferase	-0.0356874	0.994476	-1.16173	0.00811588	-0.697223	0.115837		b		b
BnaCnng62090D	Cytochrome P450;Cytochrome P450, E-class, group I;Cytochrome P450, conserved site	-0.602791	0.768484	-3.70649	0.000409634	-4.79104	1.16716e-06		b	c	bc
BnaC03g66530D	Zinc finger, RING-type;Zinc finger, RING/FYVE/PHD-type	-0.0382043	0.986332	-0.989997	0.0370406	-1.18898	0.00481998		b	c	bc
BnaC08g16790D	Chlorophyll A-B binding protein, plant;Chlorophyll A-B binding protein;Chlorophyll a/b binding protein domain	1.07681	0.00189706	0.891427	0.0285778	0.843606	0.0389148	a	b	c	abc
BnaA07g27960D	Domain of unknown function DUF221	-0.51449	0.806978	0.771809	0.204149	1.98282	5.19124e-06			c	c
BnaC05g04700D	Photosystem II PsbW, class 2	-0.00351317	1	0.28252	0.652138	1.0265	0.00450789			c	c
BnaC07g25850D	Protein of unknown function DUF1675	1.80645	0.0659135	1.73912	0.0016056	3.0722	3.82269e-10		b	c	bc
BnaA09g26380D	Protein of unknown function DUF761, plant	1.9154	0.386764	3.28766	0.0560938	3.41924	0.0140352			c	c
BnaC04g14990D	Tetratricopeptide-like helical;Tetratricopeptide repeat-containing domain	-0.810011	0.46246	-0.157214	0.875067	-1.103	0.0192736			c	c
BnaC04g38750D	no data	0.285861	0.897091	0.37541	0.583407	0.984186	0.0253287			c	c
BnaC01g03180D	SEC7-like;Armadillo-like helical;Domain of unknown function DUF1981, SEC7 associated;Armadillo-type fold;SEC7-like, alpha orthogonal bundle	-1.17074	0.364775	-2.67032	0.000395969	-2.92568	1.77334e-05		b	c	bc
BnaC01g00890D	Protein kinase, catalytic domain;Serine/threonine- / dual specificity protein kinase, catalytic domain;Serine/threonine-protein kinase, active site;Protein kinase-like domain;Protein kinase, ATP binding site;Tyrosine-protein kinase, catalytic domain	-0.832016	0.827342	-1.09185	0.306557	2.22193	0.00195316			c	c
BnaA03g53700D	no data	0.277436	0.944886	-4.61978	0.0023593	-5.32649	0.000199632		b	c	bc
BnaA02g08560D	no data	0.0625366	0.990992	0.188105	0.886854	-1.73977	0.00645694			c	c
BnaC03g71650D	Uncharacterised protein family UPF0497, trans-membrane plant subgroup;Uncharacterised protein family UPF0497, trans-membrane plant	-0.18983	0.921586	-1.16029	0.107999	-1.70695	0.00456818			c	c
BnaC01g41850D	UDP-glucuronosyl/UDP-glucosyltransferase	0.00258091	1	-0.929342	0.659225	-3.45707	0.00511852			c	c
BnaA09g38260D	Adenylate kinase;UMP-CMP kinase	1.19688	0.852043	-3.60334	0.00751554	-1.65342	0.194427		b		b
BnaC04g47350D	DNA-binding WRKY	0.782972	0.708147	-2.48634	0.00978863	-0.946332	0.332884		b		b
BnaA07g35640D	Kelch repeat type 1;Galactose oxidase, beta-propeller	2.48223	0.000522783	1.15524	0.289552	-0.662945	0.522265	a			a
BnaA05g18430D	No apical meristem (NAM) protein	-0.0685626	0.994476	-2.24473	0.0862773	-3.17414	0.00275773			c	c
BnaA01g36810D	Leucine-rich repeat;Leucine-rich repeat-containing N-terminal, type 2;Leucine rich repeat 4	0.84422	0.0679583	2.29571	0.00157845	3.01498	6.31124e-06		b	c	bc
BnaC01g16310D	Serine hydrolase FSH	-0.108232	0.980048	-0.0978063	0.942865	1.17543	0.0415657			c	c
BnaC08g14940D	no data	0.165376	0.891147	0.980914	0.0381596	1.80093	9.87306e-06		b	c	bc
BnaA09g30420D	CS-like domain;HSP20-like chaperone;CS domain	-0.843129	0.600628	2.13314	0.000514359	3.85157	7.71201e-12		b	c	bc
BnaC05g19560D	no data	-3.23439	0.478686	-5.32965	0.002972	-4.89719	0.00214962		b	c	bc
BnaC04g09800D	no data	0.76435	0.78482	1.67117	0.110855	3.937	1.59208e-06			c	c
BnaC03g05180D	Glutaredoxin;Glutaredoxin-like, plant II;Thioredoxin-like fold	-0.244918	0.948156	-1.88093	0.00676738	-1.62996	0.0124361		b	c	bc
BnaC08g30070D	no data	-0.638164	0.782762	-1.99708	0.0234996	-0.391465	0.666705		b		b
BnaAnng18900D	Synaptojanin, N-terminal	-0.181505	0.925142	-1.32613	0.0367612	-0.748864	0.246404		b		b
BnaC02g32240D	no data	0.590707	0.950129	-3.65175	0.00455529	-1.5412	0.207746		b		b
BnaC05g03820D	UDP-glucuronosyl/UDP-glucosyltransferase	1.83056	7.52361e-06	2.18429	0.000409024	1.3989	0.0210735	a	b	c	abc
BnaC04g56730D	Protein of unknown function DUF1313	1.76792	0.74023	2.80692	0.0108625	1.82657	0.010544		b	c	bc
BnaC08g48340D	Tify;CO/COL/TOC1, conserved site	-0.308823	0.946131	-1.31927	0.0447372	0.157684	0.848018		b		b
BnaA03g42010D	Uncharacterised protein family UPF0497, trans-membrane plant subgroup;Uncharacterised protein family UPF0497, trans-membrane plant	-1.24902	0.865159	-7.41841	0.00115863	-6.60033	0.00221173		b	c	bc
BnaA02g09980D	Yippee-like protein	0.986781	0.256453	1.33843	0.0304241	0.442062	0.489108		b		b
BnaC04g17480D	Leucine carboxyl methyltransferase;S-adenosyl-L-methionine-dependent methyltransferase, putative	-0.851141	0.0562916	-0.910846	0.0491428	-0.260077	0.628357		b		b
BnaC07g26450D	Protein kinase, catalytic domain;Serine-threonine/tyrosine-protein kinase catalytic domain;Leucine-rich repeat;Serine/threonine- / dual specificity protein kinase, catalytic domain;Protein kinase-like domain;Leucine-rich repeat-containing N-terminal, type 2;Concanavalin A-like lectin/glucanase, subgroup;Tyrosine-protein kinase, catalytic domain	0.0920535	0.970595	-1.22969	0.0367226	-0.936924	0.0915819		b		b
BnaA01g16450D	Domain of unknown function DUF3700	0.133015	0.950963	1.04563	0.00449528	0.252394	0.591535		b		b
BnaC03g08550D	no data	0.279942	0.94349	-0.100586	0.931683	1.01625	0.0269704			c	c
BnaA05g09030D	NAD-dependent epimerase/dehydratase;UDP-glucose 4-epimerase;NAD(P)-binding domain;UDP-glucose 4-epimerase C-terminal domain	-0.701058	0.488864	0.813473	0.158191	1.59509	0.000389791			c	c
BnaC04g10350D	Leucine-rich repeat;Leucine-rich repeat, typical subtype;Leucine-rich repeat-containing N-terminal, type 2	-0.867166	0.837969	0.718661	0.475288	1.76041	0.0041167			c	c
BnaCnng62810D	UDP-glucuronosyl/UDP-glucosyltransferase	0.163482	0.9436	0.927783	0.465485	2.62316	0.00126304			c	c
BnaA06g00750D	Protein kinase, catalytic domain;Serine/threonine- / dual specificity protein kinase, catalytic domain;Leucine-rich repeat, typical subtype;Protein kinase-like domain;Leucine-rich repeat-containing N-terminal, type 2;Concanavalin A-like lectin/glucanase, subgroup;Protein kinase, ATP binding site;Tyrosine-protein kinase, catalytic domain	-0.37932	0.522791	-0.218214	0.743338	-0.986614	0.00850032			c	c
BnaA05g28870D	SANT/Myb domain;Myb domain, plants;Homeodomain-like;Myb domain	-0.503987	0.186399	-1.45828	2.2061e-06	-0.876623	0.00401709		b	c	bc
BnaCnng01560D	Inorganic pyrophosphatase	-0.530777	0.546164	-1.38181	0.001003	-0.504703	0.287703		b		b
BnaCnng09730D	no data	-0.15565	0.934405	-0.106833	0.926581	1.17842	0.0207169			c	c
BnaA05g27260D	U box domain;Armadillo-like helical;Zinc finger, RING/FYVE/PHD-type;Armadillo-type fold	-0.0313748	0.999466	-2.77104	0.00559978	-2.42916	0.00747752		b	c	bc
BnaA03g13620D	AP2/ERF domain;DNA-binding, integrase-type	4.16292	0.228375	1.40375	0.180824	1.54889	0.0368187			c	c
BnaA08g12680D	Protein of unknown function DUF1218	0.229589	0.887073	-1.00033	0.0848764	-1.98343	2.82149e-05			c	c
BnaC03g52010D	Phosphatidylethanolamine-binding, conserved site;Phosphatidylethanolamine-binding protein PEBP	-0.294154	0.93587	0.538969	0.603924	1.46908	0.0202764			c	c
BnaC02g03820D	Toll/interleukin-1 receptor homology (TIR) domain;Disease resistance protein;Leucine-rich repeat;NB-ARC	-0.163193	0.959983	-1.95241	0.0264632	-1.25151	0.133629		b		b
BnaC04g11590D	Leucine-rich repeat;Leucine-rich repeat, typical subtype	-0.144346	1	-5.2509	0.0030795	-3.45369	0.0153676		b	c	bc
BnaCnng11240D	Disease resistance protein;Leucine-rich repeat;NB-ARC;AAA+ ATPase domain;Leucine-rich repeat 3	0.0255588	1	-1.49277	0.00413878	-0.809955	0.105774		b		b
BnaC07g38450D	Disease resistance protein;NB-ARC;AAA+ ATPase domain;Leucine-rich repeat 3	-0.533646	0.889032	-2.96183	0.0352921	-2.66487	0.038389		b	c	bc
BnaAnng32770D	Peptidase S26B, eukaryotic signal peptidase;Peptidase S24/S26A/S26B/S26C, beta-ribbon domain;Peptidase S24/S26A/S26B/S26C;Peptidase S24/S26A/S26B	-0.39496	0.738489	-2.19543	0.00676116	-1.08749	0.173821		b		b
BnaC02g39700D	Zinc finger, RING-type;Zinc finger, RING/FYVE/PHD-type	-0.0786241	1	-7.0571	0.000980283	-6.43846	0.00089448		b	c	bc
BnaCnng41750D	Terpene synthase, N-terminal domain;Terpene synthase, metal-binding domain;Terpenoid cyclases/protein prenyltransferase alpha-alpha toroid;Terpenoid synthase	-0.757086	0.496399	0.959875	0.374075	2.71099	0.000218846			c	c
BnaCnng08620D	AP2/ERF domain;DNA-binding, integrase-type	-1.24518	0.000102163	0.145669	0.86676	-0.209417	0.695618	a			a
BnaC07g10280D	no data	1.61246	0.113433	2.06464	0.000667335	1.63716	0.00237175		b	c	bc
BnaA10g17640D	RNA recognition motif domain;Nucleotide-binding, alpha-beta plait	-0.463993	0.902585	-3.10674	0.00976051	-1.22038	0.281211		b		b
BnaA03g31970D	Chaperonin TCP-1, conserved site;Chaperonin Cpn60/TCP-1;T-complex protein 1, eta subunit;Chaperone, tailless complex polypeptide 1	0.0906488	0.9436	-0.0799407	0.930877	-0.812487	0.0476899			c	c
BnaA09g00710D	Sucrose synthase;Glycosyl transferase, family 1;Sucrose synthase, plant/cyanobacteria	0.187384	0.982334	2.19606	0.159201	4.28514	0.000254954			c	c
BnaA05g08020D	Basic-leucine zipper domain	0.234036	0.964091	1.39059	0.0567629	1.73998	0.00364724			c	c
BnaA03g31510D	AP2/ERF domain;DNA-binding, integrase-type	0.166393	0.958274	0.889073	0.133711	0.993864	0.029932			c	c
BnaA06g31960D	Cytochrome P450;Cytochrome P450, E-class, group I;Cytochrome P450, conserved site	-0.46467	0.624137	0.1662	0.822409	1.15928	0.000968263			c	c
BnaA07g28080D	Expansin;Expansin/pollen allergen, DPBB domain;Expansin, cellulose-binding-like domain;Expansin/Lol pI;Barwin-related endoglucanase;Barwin-like endoglucanase	-0.101114	0.977141	-0.155625	0.875232	-1.03407	0.0296993			c	c
BnaA09g42990D	Homeodomain-like	-1.69711	0.0854899	-4.85228	1.28379e-10	-5.01813	1.00617e-12		b	c	bc
BnaC07g38010D	Protein kinase, catalytic domain;Serine/threonine- / dual specificity protein kinase, catalytic domain;Gnk2-homologous domain;Serine/threonine-protein kinase, active site;Protein kinase-like domain;Concanavalin A-like lectin/glucanase, subgroup;Protein kinase, ATP binding site;Tyrosine-protein kinase, catalytic domain	-2.24284	0.284356	-4.67601	0.00067913	-2.55737	0.0339715		b	c	bc
BnaC03g08650D	Toll/interleukin-1 receptor homology (TIR) domain;Disease resistance protein;NB-ARC;Leucine-rich repeat 3	-0.342676	0.638173	-0.847838	0.0723135	-0.901667	0.0321669			c	c
BnaC03g74420D	Protein kinase, catalytic domain;Leucine-rich repeat;Serine/threonine- / dual specificity protein kinase, catalytic domain;Serine/threonine-protein kinase, active site;Protein kinase-like domain;Leucine-rich repeat-containing N-terminal, type 2;Protein kinase, ATP binding site;Tyrosine-protein kinase, catalytic domain	-1.87884	0.135113	-3.48864	0.00122575	-2.91369	0.00364334		b	c	bc
BnaA05g33710D	no data	0.293935	0.899309	0.162047	0.837929	0.859822	0.0327036			c	c
BnaC08g01240D	no data	-0.0903103	0.990925	-1.85892	0.0370605	-2.50052	0.00195613		b	c	bc
BnaA04g22700D	Transferase;Chloramphenicol acetyltransferase-like domain	-0.849048	0.328422	0.893926	0.426346	2.26807	0.0017263			c	c
BnaA05g36740D	Zinc finger, Dof-type	-0.164663	0.926491	0.938559	0.0120677	1.49428	4.44208e-07		b	c	bc
BnaC08g14710D	Alpha/beta hydrolase fold-1;Alpha/beta hydrolase, N-terminal	0.173917	0.937438	-1.07372	0.00724956	-0.232254	0.636057		b		b
BnaC02g02590D	SANT/Myb domain;Myb domain, plants;Homeodomain-like;Myb-like domain;Myb domain	-0.123673	1	-4.05872	0.00178395	-1.57796	0.189536		b		b
BnaA03g18140D	Histone H2A;Histone core;Histone-fold	0.53267	0.582985	0.269479	0.838676	-1.84599	0.0140815			c	c
BnaC09g01070D	Peptidase S8/S53 domain;Protease-associated domain, PA;Proteinase inhibitor I9;Peptidase S8, subtilisin-related;Peptidase S8, subtilisin, Ser-active site	-1.79143	0.422488	-5.83442	1.41372e-05	-3.34187	0.00416016		b	c	bc
BnaA03g32610D	General substrate transporter;Sugar transporter, conserved site;YTH domain;Major facilitator superfamily;Major facilitator superfamily domain, general substrate transporter;Major facilitator superfamily domain	-0.27069	0.874531	-1.46344	0.0104857	-1.47277	0.00549519		b	c	bc
BnaC03g58430D	Drug/metabolite transporter;Domain of unknown function DUF250	-1.39481	0.347473	-2.08595	0.0111244	-3.22363	2.26266e-06		b	c	bc
BnaA09g08980D	Protein kinase, catalytic domain;Serine-threonine/tyrosine-protein kinase catalytic domain;Serine/threonine- / dual specificity protein kinase, catalytic domain;Serine/threonine-protein kinase, active site;Protein kinase-like domain;Concanavalin A-like lectin/glucanase, subgroup;Protein kinase, ATP binding site;Tyrosine-protein kinase, catalytic domain	-0.552973	0.848717	-3.28182	0.000756136	-2.32221	0.00802815		b	c	bc
BnaC03g51040D	Bromodomain;NET domain	0.0145532	1	0.400202	0.567314	2.14535	2.4083e-09			c	c
BnaC07g13120D	Ubiquitin;Ribosomal protein S27a;Ubiquitin conserved site;Ubiquitin supergroup;Ubiquitin subgroup	-0.0452702	0.982915	-0.0231513	0.983798	-0.849649	0.0489291			c	c
BnaC05g11720D	no data	0.0776789	0.972227	-0.637676	0.118194	-0.965027	0.00400216			c	c
BnaA07g37580D	no data	-0.0722132	0.984484	-1.37417	0.00720545	-0.459796	0.411674		b		b
BnaC05g43440D	Para-hydroxybenzoic acid efflux pump subunit AaeB/fusaric acid resistance protein	-1.04889	0.00163119	-1.07645	0.0126937	-0.205205	0.709265	a	b		ab
BnaC04g00610D	Myc-type, basic helix-loop-helix (bHLH) domain	0.2733	0.847457	1.52406	0.0307929	0.759307	0.286885		b		b
BnaCnng57580D	Sugar/inositol transporter;General substrate transporter;Sugar transporter, conserved site;Major facilitator superfamily domain, general substrate transporter;Major facilitator superfamily domain	0.536413	0.623948	-0.235513	0.791916	-0.939945	0.0426057			c	c
BnaC03g63780D	Leucine-rich repeat-containing N-terminal, type 2	-0.432768	0.820605	-0.128926	0.934884	-2.18022	0.0423949			c	c
BnaC03g59660D	Domain of unknown function DUF221	-0.53955	0.796425	0.166352	0.867491	1.05933	0.0253464			c	c
BnaA02g03210D	Leucine-rich repeat-containing N-terminal, type 2	-0.0607726	1	-3.07985	0.00365026	-1.27511	0.203274		b		b
BnaA08g17050D	Phospholipase-like, arabidopsis	-0.605911	0.922895	-5.22466	0.000568834	-4.46143	0.0010256		b	c	bc
BnaC03g13140D	Protein kinase, catalytic domain;Serine/threonine- / dual specificity protein kinase, catalytic domain;U box domain;UspA;Serine/threonine-protein kinase, active site;Protein kinase-like domain;Zinc finger, RING/FYVE/PHD-type;Rossmann-like alpha/beta/alpha sandwich fold;Protein kinase, ATP binding site;Tyrosine-protein kinase, catalytic domain	0.111535	0.937694	-1.59126	0.0271317	-1.27882	0.0596153		b		b
BnaC02g45350D	Serine-threonine/tyrosine-protein kinase catalytic domain;Protein kinase-like domain;Concanavalin A-like lectin/glucanase, subgroup;Protein kinase, ATP binding site	-0.999427	0.431678	-1.63905	0.010148	-0.486282	0.482614		b		b
BnaC03g65810D	Ornithine/DAP/Arg decarboxylase;Arginine decarboxylase;Orn/DAP/Arg decarboxylase 2, C-terminal;Orn/DAP/Arg decarboxylase 2, N-terminal;Orn/DAP/Arg decarboxylase 2, pyridoxal-phosphate binding site;Orn/DAP/Arg decarboxylase 2, conserved site	-1.36828	0.211763	-1.67743	0.0132404	-0.952491	0.170694		b		b
BnaC05g15020D	Basic-leucine zipper domain	-0.262579	0.830086	-0.962183	0.0252071	0.182462	0.730956		b		b
BnaC03g72920D	Protein kinase, catalytic domain;Serine/threonine- / dual specificity protein kinase, catalytic domain;Protein kinase-like domain;Tyrosine-protein kinase, catalytic domain	-0.378936	0.836489	-1.7913	0.0351733	-1.5113	0.051656		b		b
BnaA09g44910D	NB-ARC	-0.641634	0.850216	-2.36807	0.00920532	-2.27606	0.00616703		b	c	bc
BnaC03g38830D	ThiJ/PfpI;DJ-1	0.0635349	0.994476	-2.34506	0.00955191	-2.17537	0.00691329		b	c	bc
BnaCnng59150D	Glyoxalase-like domain	0.260521	0.832545	0.778357	0.0595293	0.783485	0.0354731			c	c
BnaA03g39820D	Transcription factor, MADS-box;Transcription factor, K-box	0.294735	0.82164	-0.200941	0.816296	-1.21662	0.00358015			c	c
BnaC03g20080D	Protein kinase, catalytic domain;Serine/threonine- / dual specificity protein kinase, catalytic domain;Serine/threonine-protein kinase, active site;Protein kinase-like domain;Concanavalin A-like lectin/glucanase, subgroup;Protein kinase, ATP binding site;Tyrosine-protein kinase, catalytic domain	-0.176666	0.979221	-0.977156	0.158133	-1.57401	0.00415621			c	c
BnaC05g15350D	Domain of unknown function DUF250	-0.148396	0.964389	0.826217	0.311265	1.50792	0.0113562			c	c
BnaA03g27520D	Band 7 protein;Stomatin	1.76775	0.0529779	-2.40327	0.0536286	-3.45929	0.00174302			c	c
BnaA03g57320D	no data	0.396907	0.869783	-1.20517	0.0185923	-0.663518	0.186857		b		b
BnaA06g22540D	Phox/Bem1p	0.450593	0.921015	0.669421	0.470458	2.41889	7.10612e-06			c	c
BnaA06g22560D	Metallophosphoesterase domain;Phosphoesterase At2g46880	-0.147915	0.956445	-5.55194	7.03956e-05	-3.60605	0.0031187		b	c	bc
BnaC08g11400D	Heat shock protein Hsp90;Histidine kinase-like ATPase, ATP-binding domain;Endoplasmin;Heat shock protein Hsp90, conserved site;Ribosomal protein S5 domain 2-type fold;Heat shock protein Hsp90, N-terminal	0.729251	0.339078	1.0179	0.0843561	1.66138	0.00108261			c	c
BnaC07g13750D	no data	0.341487	0.656168	0.583398	0.258438	0.997502	0.011921			c	c
BnaC09g33920D	Zinc finger, CCCH-type;Ankyrin repeat;Ankyrin repeat-containing domain	0.647944	0.36488	0.0956179	0.922464	1.21734	0.00254445			c	c
BnaC09g45710D	Peptidase A1;Aspartic peptidase	0.0946369	0.979963	-1.74418	0.00146044	-1.38362	0.00914745		b	c	bc
BnaA03g09490D	Protein kinase, catalytic domain;Leucine-rich repeat;Serine/threonine- / dual specificity protein kinase, catalytic domain;Serine/threonine-protein kinase, active site;Protein kinase-like domain;Leucine-rich repeat-containing N-terminal, type 2;Concanavalin A-like lectin/glucanase, subgroup;Protein kinase, ATP binding site;Tyrosine-protein kinase, catalytic domain	-0.067792	0.977998	-2.16197	0.00259967	-1.74673	0.0115788		b	c	bc
BnaA06g31640D	Zinc finger, AN1-type	-0.153434	0.987039	-4.20886	5.98862e-05	-2.48154	0.00866887		b	c	bc
BnaA05g29070D	Armadillo-like helical;Armadillo-type fold	0.290267	0.661755	0.697425	0.10033	1.45491	1.34337e-05			c	c
BnaCnng41720D	Protein kinase, catalytic domain;Serine/threonine- / dual specificity protein kinase, catalytic domain;Serine/threonine-protein kinase, active site;Regulator of chromosome condensation 1/beta-lactamase-inhibitor protein II;Protein kinase-like domain;Concanavalin A-like lectin/glucanase, subgroup;Protein kinase, ATP binding site;Tyrosine-protein kinase, catalytic domain	1.58587	0.759744	-4.46213	0.0193771	-2.71624	0.087554		b		b
BnaC08g11600D	Toll/interleukin-1 receptor homology (TIR) domain	-0.152881	0.976046	-1.94386	0.0327233	-1.1461	0.209639		b		b
BnaAnng15750D	Gamma interferon inducible lysosomal thiol reductase GILT;Thioredoxin-like fold	0.267592	0.773047	0.966748	0.00273134	0.908418	0.00298786		b	c	bc
BnaC04g55340D	Cytochrome P450;Cytochrome P450, E-class, group I	0.353794	0.933718	-2.34612	0.0100329	-1.16523	0.181994		b		b
BnaA05g14140D	Zinc finger, RING-type;Zinc finger, RING/FYVE/PHD-type	-0.0502006	1	-3.86646	0.000347404	-2.58599	0.00189378		b	c	bc
BnaA10g18350D	no data	4.49265	0.237037	1.94466	0.134103	3.70115	0.000346261			c	c
BnaA10g27790D	Isopenicillin N synthase;Oxoglutarate/iron-dependent dioxygenase;Non-haem dioxygenase N-terminal domain	0.0982193	0.995444	-5.61791	0.000171758	-3.23983	0.0137725		b	c	bc
BnaA08g28120D	Protein kinase, catalytic domain;Serine/threonine- / dual specificity protein kinase, catalytic domain;Serine/threonine-protein kinase, active site;Protein kinase-like domain;Concanavalin A-like lectin/glucanase, subgroup;Wall-associated kinase;Tyrosine-protein kinase, catalytic domain;Wall-associated receptor kinase galacturonan-binding domain	-0.294036	0.775103	-0.615355	0.190397	-0.82561	0.0308496			c	c
BnaC07g10720D	CMP/dCMP deaminase, zinc-binding;Cytidine deaminase-like	-0.892247	0.59897	0.436997	0.411896	1.56662	2.86318e-06			c	c
BnaA10g04840D	Protein phosphatase 2C, manganese/magnesium aspartate binding site;Protein phosphatase 2C (PP2C)-like;Protein phosphatase 2C	1.40084	0.472325	2.55748	0.00564126	4.02489	6.64385e-07		b	c	bc
BnaCnng70380D	SANT/Myb domain;Myb domain, plants;Homeodomain-like;Myb domain	-0.238396	0.881739	-0.417369	0.637415	-1.5049	0.00674037			c	c
BnaA10g12280D	Ctr copper transporter	-0.12394	0.989598	-2.48433	0.0561299	-3.05157	0.00326646			c	c
BnaC03g67550D	no data	1.88423	0.362449	1.21419	0.145802	1.28177	0.0458332			c	c
BnaC05g33680D	Domain of unknown function DUF239;Domain of unknown function DUF4409	0.495714	0.848755	-0.480968	0.852437	-4.41916	0.00188734			c	c
BnaC06g19670D	Protein kinase, catalytic domain;Serine/threonine- / dual specificity protein kinase, catalytic domain;Serine/threonine-protein kinase, active site;Protein kinase-like domain;Wall-associated kinase;EGF-like calcium-binding, conserved site;Tyrosine-protein kinase, catalytic domain;Wall-associated receptor kinase galacturonan-binding domain	1.28213	0.628341	-4.99739	0.000203578	-2.38955	0.0489524		b	c	bc
BnaA01g13810D	Protein of unknown function DUF679	-0.0883912	1	-8.60224	1.23445e-05	-4.94399	0.000479973		b	c	bc
BnaA02g00430D	Major facilitator superfamily;Major facilitator superfamily domain, general substrate transporter;Major facilitator superfamily domain	0.0901219	0.967455	-1.93429	0.0302747	-1.26482	0.141168		b		b
BnaA05g25830D	Chaperonin Cpn60/TCP-1	-0.422391	0.86316	1.90855	0.345994	4.34517	0.00105096			c	c
BnaC08g39910D	Xyloglucan fucosyltransferase	0.221094	0.979669	-6.08916	8.57152e-06	-5.71464	7.7278e-06		b	c	bc
BnaC04g08280D	UDP-glucuronosyl/UDP-glucosyltransferase	0.560169	0.868554	-3.23233	0.0223042	-1.15122	0.422088		b		b
BnaA03g56360D	Dimeric alpha-beta barrel;Stress responsive alpha-beta barrel	-0.104629	0.956627	0.00975559	0.992458	0.823527	0.0368851			c	c
BnaC05g49630D	EXS, C-terminal	0.100028	0.97414	-1.38544	0.0121809	-0.452576	0.483302		b		b
BnaA06g10110D	Asp/Glu racemase;Asp/Glu/hydantoin racemase	-0.664666	0.557785	-0.719811	0.313472	-1.41914	0.00422588			c	c
BnaCnng38050D	Glycoside hydrolase, family 16;Glycoside hydrolase, family 16, active site;Concanavalin A-like lectin/glucanases superfamily;Xyloglucan endo-transglycosylase, C-terminal;Concanavalin A-like lectin/glucanase, subgroup;Xyloglucan endotransglucosylase/hydrolase	-0.354743	0.770604	-0.458112	0.61246	-1.93781	0.000463346			c	c
BnaC03g09050D	Bulb-type lectin domain	-1.38688	0.459269	-3.00022	0.0869472	-3.97507	0.00595793			c	c
BnaC08g18090D	SANT/Myb domain;Homeodomain-like;Myb domain	0.277064	0.93951	-1.50186	0.0134019	-1.18057	0.0339316		b	c	bc
BnaC09g11570D	Uncharacterised protein family Cys-rich	-0.19923	0.905544	-1.32596	0.0182162	-0.705676	0.222239		b		b
BnaUnng00480D	Toll/interleukin-1 receptor homology (TIR) domain;Disease resistance protein;NB-ARC;AAA+ ATPase domain;Leucine-rich repeat 3	-0.180582	1	-6.80235	0.0024168	-4.08656	0.00772803		b	c	bc
BnaA06g16930D	no data	0.89179	0.894236	-6.12255	0.000325845	-2.85106	0.0340155		b	c	bc
BnaC04g45010D	Late embryogenesis abundant protein, LEA-14	0.849287	0.914631	-5.61816	0.00124458	-4.32959	0.0023439		b	c	bc
BnaC07g29830D	no data	0.827025	0.511538	-1.15934	0.00855955	0.296202	0.570158		b		b
BnaC05g18020D	GIGANTEA	0.0124684	0.999778	0.776186	0.0733959	2.14107	3.33194e-10			c	c
BnaC02g02930D	Pentatricopeptide repeat;Tetratricopeptide-like helical	0.233206	0.789604	1.10749	0.00180476	0.597348	0.113126		b		b
BnaA03g39860D	Glycosyl-phosphatidyl inositol-anchored, plant	-0.00987704	1	-2.43484	0.135104	-2.96163	0.0200081			c	c
BnaC01g03400D	Phospholipase-like, arabidopsis	-1.17024	0.212153	-2.04926	0.00203947	-1.79178	0.00375536		b	c	bc
BnaA06g17150D	ABC transporter-like;AAA+ ATPase domain;ABC transporter, conserved site;ABC transporter A, ABCA	-0.283924	0.779354	-1.19374	0.0382913	-0.612822	0.299741		b		b
BnaA03g24880D	C2 calcium-dependent membrane targeting;Phospholipase D/Transphosphatidylase;C2 calcium/lipid-binding domain, CaLB;Phospholipase D, plant;Phospholipase D family;C2 membrane targeting protein;Phospholipase D, C-terminal	0.103872	0.984659	-1.87341	0.0131771	-2.2184	0.000866615		b	c	bc
BnaA09g38190D	F-box domain, cyclin-like;Kelch repeat type 1;Galactose oxidase, beta-propeller	0.999315	0.000541556	1.28743	0.00947483	0.914644	0.0674574	a	b		ab
BnaA04g10320D	Leucine-rich repeat, cysteine-containing subtype	0.00988832	1	-1.11529	0.0210823	-0.345767	0.551844		b		b
BnaCnng37450D	Cold acclimation WCOR413	0.360056	0.889166	0.595775	0.221781	1.60861	5.38319e-06			c	c
BnaA01g18330D	Nicotinamide N-methyltransferase-like	-0.105078	0.970595	-0.610191	0.611485	-1.62151	0.0443369			c	c
BnaC09g48990D	Alpha/beta hydrolase fold-3	-0.849278	0.471449	-3.75451	0.00513661	-5.31723	9.88004e-06		b	c	bc
BnaC06g25000D	SANT/Myb domain;Zinc finger, CCHC-type;Myb domain, plants;Homeodomain-like;Myb domain	-0.372674	0.845735	-0.296138	0.633433	0.702241	0.0442298			c	c
BnaA08g13170D	Cation-transporting P-type ATPase;Cation-transporting P-type ATPase, N-terminal;H+ transporting P-type ATPase, subfamily IIIA;P-type ATPase, A domain;P-type ATPase, phosphorylation site;HAD-like domain;P-type ATPase, transmembrane domain;P-type ATPase, cytoplasmic domain N	-1.50462	0.111096	-0.324023	0.831599	-1.75976	0.0320322			c	c
BnaA04g03060D	Glycoside hydrolase, family 17;Glycoside hydrolase, catalytic domain;Glycoside hydrolase, superfamily	0.420031	0.836957	-2.90153	0.00360307	-1.88048	0.0486396		b	c	bc
BnaC02g43390D	no data	-3.20221	0.502537	-2.50857	0.0135448	-3.46776	9.75335e-05		b	c	bc
BnaC08g12490D	Domain of unknown function DUF3700	2.17345	0.0129386	1.75553	0.00070147	0.975596	0.069258	a	b		ab
BnaC04g37000D	no data	-0.345876	0.869141	-1.22398	0.0772478	-2.14837	0.000322785			c	c
BnaC09g08130D	Dehydrin	0.0353543	0.999466	1.08833	0.539041	4.76436	8.3896e-06			c	c
BnaA10g25360D	Double-stranded RNA-binding;Helicase, C-terminal;Helicase-associated domain;DNA/RNA helicase, DEAD/DEAH box type, N-terminal;Domain of unknown function DUF1605;Helicase, superfamily 1/2, ATP-binding domain;Double-stranded RNA-binding-like domain	0.198758	0.865219	-0.0901002	0.92054	-1.15993	0.00222244			c	c
BnaA01g13880D	Serine hydrolase FSH	-0.316265	0.888576	-0.318107	0.505168	0.86103	0.00373343			c	c
BnaC09g07250D	BTB/POZ-like;BTB/POZ fold;NPH3 domain	0.280158	0.739725	-0.771617	0.125077	-1.00156	0.0212175			c	c
BnaA05g22710D	Protein kinase, catalytic domain;Serine/threonine- / dual specificity protein kinase, catalytic domain;NAF domain;Serine/threonine-protein kinase, active site;Protein kinase-like domain;Protein kinase, ATP binding site;NAF/FISL domain;Tyrosine-protein kinase, catalytic domain	-0.199592	0.899659	0.757923	0.313622	1.54724	0.003815			c	c
BnaC05g37530D	no data	1.02852	0.881561	0.00195758	0.999377	3.78625	0.000337897			c	c
BnaA06g06990D	Protein kinase, catalytic domain;S-locus glycoprotein;Bulb-type lectin domain;Serine/threonine- / dual specificity protein kinase, catalytic domain;Apple-like;Serine/threonine-protein kinase, active site;Protein kinase-like domain;PAN-2 domain;Concanavalin A-like lectin/glucanase, subgroup;Tyrosine-protein kinase, catalytic domain	-0.519695	0.655463	-1.46643	0.00208906	-1.29665	0.00430594		b	c	bc
BnaA04g12710D	Beta-hydroxyacyl-(acyl-carrier-protein) dehydratase FabZ;Beta-hydroxyacyl-(acyl-carrier-protein) dehydratase, FabA/FabZ	-0.0144003	1	0.360018	0.524765	1.06155	0.00542957			c	c
BnaC04g37460D	Cytochrome b5-like heme/steroid binding domain	0.432341	0.389604	0.664178	0.0702396	0.797923	0.0135397			c	c
BnaC04g34510D	U box domain;Armadillo-like helical;Zinc finger, RING/FYVE/PHD-type;Armadillo-type fold	1.43346	0.661594	-2.04554	0.0147661	-0.12951	0.908028		b		b
BnaC03g56530D	no data	0.161311	0.950443	0.732913	0.222114	1.57159	0.000448557			c	c
BnaC03g73950D	Phosphatase tensin type;Protein-tyrosine phosphatase, active site	0.483689	0.909956	1.30704	0.075504	1.13542	0.0168489			c	c
BnaC09g22450D	Amidohydrolase 1;Metal-dependent hydrolase, composite domain;Allantoinase	-0.163555	0.917381	-0.183874	0.746524	-0.75785	0.0134793			c	c
BnaC02g18950D	Sodium/calcium exchanger membrane region	0.0220368	1	0.449529	0.74644	1.26544	0.0219015			c	c
BnaA06g13410D	Thaumatin	0.381832	0.942472	-8.4789	0.000397656	-2.4715	0.219137		b		b
BnaC07g20100D	NUDIX hydrolase domain;Nudix hydrolase 6-like;NUDIX hydrolase domain-like;NUDIX hydrolase, conserved site	-0.572171	0.87085	1.21384	0.255578	3.7096	1.21821e-06			c	c
BnaA06g13200D	no data	-0.68914	0.891557	-4.23538	0.000225383	-2.47196	0.0290568		b	c	bc
BnaA03g45510D	Concanavalin A-like lectin/glucanase, subgroup	2.71351	0.634303	-2.49151	0.0150364	-1.56863	0.00753834		b	c	bc
BnaA06g15120D	VHS;GAT;ENTH/VHS;Target of Myb protein 1;VHS subgroup	-0.380108	0.753801	-1.21859	0.0233216	-0.636879	0.246982		b		b
BnaCnng41630D	SAM dependent carboxyl methyltransferase	-0.751769	0.767551	-2.34895	0.000247876	-0.695813	0.322565		b		b
BnaA08g17060D	no data	-1.50102	0.698758	-5.96326	0.000212441	-4.39827	0.00173873		b	c	bc
BnaA02g01220D	Protein of unknown function DUF4228	-0.188192	1	-6.37498	0.000896229	-4.59484	0.000380172		b	c	bc
BnaA04g22400D	Mlo-related protein	-0.740585	0.944886	-5.47274	0.000671268	-4.95629	0.00075298		b	c	bc
BnaA07g16710D	Ferritin;Ferritin/DPS protein domain;Ferritin- like diiron domain;Ferritin/ribonucleotide reductase-like;Ferritin-related;Ferritin, conserved site	-1.04676	0.152955	-0.60602	0.201791	-1.60475	7.26958e-06			c	c
BnaA03g05800D	3-oxo-5-alpha-steroid 4-dehydrogenase, C-terminal	0.0133661	1	0.287305	0.778707	1.45647	0.00385022			c	c
BnaC01g15050D	Late embryogenesis abundant protein, LEA-14;Immunoglobulin-like fold	1.98052	0.423655	-4.00928	0.00458337	-3.90885	0.00166779		b	c	bc
BnaC03g19840D	Late embryogenesis abundant protein, LEA-14	1.71699	0.795611	-3.74465	0.00991659	-1.00995	0.469655		b		b
BnaC08g16480D	no data	1.21509	0.566146	0.2531	0.802627	1.3326	0.00253491			c	c
BnaC08g49360D	RNA recognition motif domain;Nucleotide-binding, alpha-beta plait	0.964401	0.0172551	1.76689	2.68772e-05	1.23174	0.00283058	a	b	c	abc
BnaA04g16920D	Ionotropic glutamate receptor;Extracellular solute-binding protein, family 3;Extracellular ligand-binding receptor;Ionotropic glutamate receptor, plant	0.287302	0.899763	-2.74776	0.00961663	-3.0199	0.00124502		b	c	bc
BnaA09g32000D	Six-bladed beta-propeller, TolB-like;Strictosidine synthase, conserved region	0.176939	0.910824	-0.807515	0.283114	-1.77511	0.00167571			c	c
BnaC01g27270D	DnaJ domain;DnaJ domain, conserved site	0.817604	0.749634	2.86826	5.40031e-05	4.35765	8.0066e-12		b	c	bc
BnaA03g33730D	Alcohol dehydrogenase superfamily, zinc-type;GroES-like;Alcohol dehydrogenase GroES-like;NAD(P)-binding domain;Polyketide synthase, enoylreductase	0.0450719	0.97962	-0.712678	0.0193645	-0.676035	0.0201708		b	c	bc
BnaC07g45950D	DnaJ domain	1.30602	0.00218242	-0.0901715	0.956655	-0.322077	0.715865	a			a
BnaCnng08040D	NmrA-like;NAD(P)-binding domain	0.0106514	1	-3.67465	0.00134316	-0.710788	0.570968		b		b
BnaC02g25740D	YTH domain	-0.51904	0.560231	0.22738	0.843186	1.7318	0.00105477			c	c
BnaC08g03570D	B-cell receptor-associated 31-like	-0.108277	0.978622	0.424734	0.529946	1.06949	0.0091091			c	c
BnaC03g39390D	DNA mismatch repair protein MutS, connector domain	-0.840234	0.900103	-7.5457	0.000284624	-1.63824	0.408605		b		b
BnaC02g30770D	Phytochelatin synthase;Phytochelatin synthase, C-terminal	-0.702652	0.766507	-4.52706	0.00124458	-4.51681	0.000335337		b	c	bc
BnaC08g39190D	Uncharacterised protein family Cys-rich	0.0757014	0.976358	-3.97491	0.000652487	-3.99526	0.000149839		b	c	bc
BnaC08g36280D	Protein phosphatase 2C (PP2C)-like;Protein phosphatase 2C	-0.524239	0.627734	-1.14388	0.00737927	-1.04087	0.00976864		b	c	bc
BnaC05g20280D	Glycoside hydrolase, family 1;Glycoside hydrolase, catalytic domain;Glycoside hydrolase, superfamily;Glycoside hydrolase, family 1, active site	-0.235647	0.813709	-0.632493	0.305826	-1.11293	0.0159703			c	c
BnaA10g13930D	No apical meristem (NAM) protein	1.86071	0.778404	-5.7477	3.12839e-06	-3.68156	6.23662e-06		b	c	bc
BnaA07g38760D	K+ potassium transporter	0.937852	0.0898349	0.931058	0.127249	2.09788	1.10215e-05			c	c
BnaA05g33100D	Domain of unknown function DUF861, cupin-3;RmlC-like cupin domain;RmlC-like jelly roll fold	0.553829	0.954044	-3.00909	0.000833897	-3.01369	0.000108915		b	c	bc
BnaA09g35730D	no data	-1.01367	0.013779	0.0560075	0.971973	1.1917	0.0524651	a			a
BnaA02g10830D	Transcription factor GRAS	-0.263921	0.933379	0.0756262	0.946114	1.03451	0.0114935			c	c
BnaA05g29370D	Copper chaperone SCO1/SenC;Thioredoxin-like fold;Synthesis of cytochrome c oxidase, Sco1/Sco2	-0.0142667	1	-0.745963	0.342215	-1.69655	0.00341256			c	c
BnaC09g18930D	no data	0.0422429	0.989915	0.488425	0.422221	1.09995	0.00558709			c	c
BnaAnng34370D	Aldo/keto reductase;Aldo/keto reductase subgroup;NADP-dependent oxidoreductase domain	-2.8068	0.414959	-10.9842	0.000212035	-7.19609	0.00235743		b	c	bc
BnaA07g32130D	Knottin;Gamma thionin	-0.0940051	0.989973	-0.671389	0.616617	-2.3907	0.00240022			c	c
BnaC04g41540D	no data	0.0129885	1	0.126338	0.889956	-1.2076	0.00516401			c	c
BnaC08g38520D	Protein kinase, catalytic domain;Serine/threonine- / dual specificity protein kinase, catalytic domain;Serine/threonine-protein kinase, active site;Protein kinase-like domain;Concanavalin A-like lectin/glucanase, subgroup;Wall-associated kinase;EGF-like calcium-binding, conserved site;Tyrosine-protein kinase, catalytic domain;Wall-associated receptor kinase galacturonan-binding domain	-1.09781	0.690968	-1.12211	0.398842	-2.82422	0.000820712			c	c
BnaA03g20290D	Glycoside hydrolase, family 19, catalytic;Chitin-binding, type 1;Glycoside hydrolase, family 19;Chitin-binding, type 1, conserved site;Lysozyme-like domain	-0.52121	0.776366	-6.73869	0.000120273	-5.19757	0.00083323		b	c	bc
BnaA06g40150D	NUDIX hydrolase domain;Nudix hydrolase 6-like;NUDIX hydrolase domain-like;NUDIX hydrolase, conserved site	-0.72744	0.847997	0.529795	0.596881	2.59851	1.77458e-06			c	c
BnaA02g35010D	Malic oxidoreductase;Malic enzyme, N-terminal;Malic enzyme, NAD-binding;Malic enzyme, conserved site;NAD(P)-binding domain	-0.423882	0.906522	-2.44505	0.00277681	0.0104994	0.992697		b		b
BnaA06g08460D	F-box domain, cyclin-like	-0.434557	0.601872	-0.752575	0.0336658	-1.38636	9.08816e-06		b	c	bc
BnaA07g14910D	Helix-turn-helix motif;Homeodomain;Leucine zipper, homeobox-associated;Homeodomain-like;Homeobox, conserved site	-1.67714	0.000947699	-1.11855	0.218938	-0.601095	0.501009	a			a
BnaA08g11780D	Plant peroxidase;Haem peroxidase, plant/fungal/bacterial;Haem peroxidase;Peroxidases heam-ligand binding site;Peroxidase, active site	-0.694226	0.695494	-1.91892	7.85852e-06	-2.36183	1.18772e-08		b	c	bc
BnaC09g42780D	FAD binding domain;L-aspartate oxidase;Fumarate reductase/succinate dehydrogenase flavoprotein-like, C-terminal	-0.669729	0.135668	-1.77182	8.63566e-05	-0.673312	0.174361		b		b
BnaA09g32310D	Protein kinase, catalytic domain;Serine-threonine/tyrosine-protein kinase catalytic domain;Serine/threonine- / dual specificity protein kinase, catalytic domain;Serine/threonine-protein kinase, active site;Protein kinase-like domain;Concanavalin A-like lectin/glucanase, subgroup;Tyrosine-protein kinase, catalytic domain;Malectin-like carbohydrate-binding domain	-0.0595215	0.976037	-1.36861	0.0260171	-0.987758	0.0977052		b		b
BnaA05g00720D	Glycosyl transferase, family 8	-0.70906	0.634303	-0.653666	0.465693	2.76099	1.85794e-06			c	c
BnaA06g27280D	Cryptochrome/DNA photolyase, class 1;DNA photolyase, FAD-binding/Cryptochrome, C-terminal;DNA photolyase, N-terminal;Cryptochrome, DASH;Rossmann-like alpha/beta/alpha sandwich fold	-1.38334	0.0137529	-2.50817	4.38458e-05	-1.78944	0.00169977	a	b	c	abc
BnaA09g48420D	Germin;Cupin 1;RmlC-like cupin domain;RmlC-like jelly roll fold;Germin, manganese binding site	-0.619082	0.878135	-3.11337	0.000490847	-1.02557	0.239595		b		b
BnaC03g32530D	Band 7 protein;Stomatin	1.56605	0.000104499	-0.0715624	0.963925	-0.933655	0.183447	a			a
BnaAnng04700D	no data	2.1383	6.15271e-06	0.865637	0.324695	-0.423752	0.628056	a			a
BnaC06g23310D	Partial AB-hydrolase lipase domain	0.210233	0.934904	0.448141	0.32417	1.19443	8.62969e-05			c	c
BnaA01g12890D	Thaumatin;Thaumatin, conserved site	-0.567781	0.758619	-4.08033	0.000717716	-3.60354	0.00108196		b	c	bc
BnaA01g07270D	Type I phosphodiesterase/nucleotide pyrophosphatase/phosphate transferase;Alkaline phosphatase-like, alpha/beta/alpha;Alkaline-phosphatase-like, core domain;Ectonucleotide pyrophosphatase/phosphodiesterase family	-0.156906	0.964091	-0.80075	0.0355911	-0.396876	0.310076		b		b
BnaA05g29010D	Metallothionein, family 15, plant	-0.0698482	0.965937	1.10562	0.01822	1.22806	0.00415621		b	c	bc
BnaCnng50560D	Zinc finger, RING-type;Zinc finger, RING/FYVE/PHD-type	-0.00838353	1	-0.149672	0.764754	-0.642106	0.019599			c	c
BnaA03g11340D	C2 calcium-dependent membrane targeting;C2 calcium/lipid-binding domain, CaLB	-0.154468	0.939257	-0.0985279	0.874985	-0.855242	0.00345205			c	c
BnaA03g58610D	Cytochrome P450;Cytochrome P450, E-class, group I;Cytochrome P450, conserved site	0.233835	0.972405	-4.02779	0.00248646	-4.39395	0.000163653		b	c	bc
BnaA07g31420D	Chaperonin ClpA/B;AAA+ ATPase domain;ATPase, AAA-type, core;Clp, N-terminal;ATPase, AAA-2;Chaperonin ClpA/B, conserved site;Clp ATPase, C-terminal;Double Clp-N motif	1.08163	0.011243	3.15721	7.63888e-11	5.47182	7.0092e-29	a	b	c	abc
BnaA09g53050D	WD40 repeat;WD40/YVTN repeat-like-containing domain;WD40-repeat-containing domain;WD40 repeat, conserved site;G-protein beta WD-40 repeat	0.364117	0.941013	-2.56362	0.0181321	-1.49741	0.132907		b		b
BnaC01g10070D	Protein phosphatase 2C (PP2C)-like;Protein phosphatase 2C	-0.280458	0.93152	-1.75073	0.00455924	-0.967581	0.108817		b		b
BnaC08g49690D	Myc-type, basic helix-loop-helix (bHLH) domain	1.49111	0.40747	1.79633	0.112792	2.42985	0.010592			c	c
BnaAnng07910D	Proline dehydrogenase;Proline oxidase	-1.21318	0.620739	-1.01689	0.334537	-2.91767	4.45996e-05			c	c
BnaA09g38860D	Ribosomal protein S27e;Ribosomal protein, zinc-binding domain;Ribosomal protein S27e, zinc-binding domain	-0.0779614	0.958338	-0.0649227	0.957991	-1.02889	0.0430378			c	c
BnaC03g73660D	General substrate transporter;Sugar transporter, conserved site;Major facilitator superfamily;Major facilitator superfamily domain, general substrate transporter;Major facilitator superfamily domain	-0.442999	0.823991	-1.64717	0.00397846	-2.01589	0.000118241		b	c	bc
BnaCnng74600D	Plastid lipid-associated protein/fibrillin conserved domain	-0.835808	0.239752	-0.252403	0.851408	1.65122	0.00797515			c	c
BnaC04g02270D	Remorin, C-terminal	0.679274	0.128879	0.919871	0.154165	1.42252	0.0057494			c	c
BnaC03g57030D	no data	0.436552	0.442525	0.616287	0.12023	0.746514	0.029987			c	c
BnaA07g06560D	Plastid lipid-associated protein/fibrillin conserved domain	-0.196094	0.845735	-0.819226	0.045911	-0.12051	0.821101		b		b
BnaC06g24430D	Bet v I domain;START-like domain;Major latex protein domain	0.439414	0.902289	1.19588	0.145158	1.96378	0.00247526			c	c
BnaCnng10850D	YjgF-like protein;YjgF/Yer057p/UK114 family;Endoribonuclease L-PSP/chorismate mutase-like;YjgF-like protein, conserved site	0.0922886	0.983643	-1.93775	0.0469442	-2.01949	0.0177692		b	c	bc
BnaC09g01720D	ATPase, AAA-type, core;AAA-type ATPase, N-terminal domain	0.737189	0.758908	-5.08547	0.00096088	-2.76444	0.0535612		b		b
BnaCnng47170D	Adenylylsulphate kinase	-0.152895	0.882235	-0.117169	0.886893	0.827942	0.0320057			c	c
BnaC06g40110D	DnaJ domain	1.67072	9.64438e-05	0.866722	0.199864	0.559139	0.3852	a			a
BnaC06g35510D	SANT/Myb domain;Homeodomain-like;Myb domain	-0.0347385	0.995148	1.14015	0.16901	1.54918	0.018678			c	c
BnaA06g31160D	AIG2-like;Butirosin biosynthesis, BtrG-like	-2.67507	0.628301	-8.73611	0.000137071	-4.29893	0.0239661		b	c	bc
BnaA03g28510D	Lipase, GDSL;SGNH hydrolase-type esterase domain	0.314656	0.84317	0.306792	0.873629	-2.15631	0.029879			c	c
BnaC02g48280D	Sugar/inositol transporter;General substrate transporter;Sugar transporter, conserved site;Major facilitator superfamily domain, general substrate transporter;Major facilitator superfamily domain	0.295048	0.803615	0.551238	0.655635	1.66476	0.0298682			c	c
BnaCnng16640D	Methyltransferase type 11	0.173877	0.956521	0.62113	0.443433	1.46637	0.00515497			c	c
BnaCnng68200D	PAS domain;PAS-associated, C-terminal	0.375794	0.593877	0.954086	0.0079971	0.948839	0.00536526		b	c	bc
BnaC09g08690D	Plant peroxidase;Haem peroxidase, plant/fungal/bacterial;Haem peroxidase;Peroxidases heam-ligand binding site;Peroxidase, active site	-0.265018	0.796619	-0.389083	0.447888	0.74882	0.0369024			c	c
BnaC07g15720D	Sugar/inositol transporter;General substrate transporter;Sugar transporter, conserved site;Major facilitator superfamily domain, general substrate transporter;Major facilitator superfamily domain	0.875517	0.240554	-0.589872	0.579131	-1.85002	0.00411539			c	c
BnaAnng13040D	no data	-1.54789	0.561993	-1.23389	0.00831164	0.25448	0.631525		b		b
BnaAnng00520D	Transferase;Chloramphenicol acetyltransferase-like domain	-2.38117	0.0170524	-2.89489	0.00306695	-1.01587	0.30786	a	b		ab
BnaC02g45310D	Wall-associated receptor kinase galacturonan-binding domain	-1.70836	0.267071	-2.15764	0.0222969	-1.48889	0.0867308		b		b
BnaC09g46240D	Multi antimicrobial extrusion protein	-0.93035	0.198131	0.303878	0.79068	2.07327	0.000212018			c	c
BnaC06g40570D	Kelch repeat type 1;Galactose oxidase, beta-propeller	1.83085	0.00169308	-0.268847	0.890226	-1.14467	0.256878	a			a
BnaAnng30680D	no data	0.463853	0.854124	-1.1181	0.00669946	0.407898	0.374374		b		b
BnaA01g32300D	Protein kinase, catalytic domain;AGC-kinase, C-terminal;Serine/threonine- / dual specificity protein kinase, catalytic domain;Serine/threonine-protein kinase, active site;Protein kinase-like domain;Protein kinase, ATP binding site;Protein kinase, C-terminal;Tyrosine-protein kinase, catalytic domain	-1.24701	0.787689	-0.158354	0.939832	2.30877	0.0040176			c	c
BnaAnng21880D	Ubiquitin-conjugating enzyme, E2;Ubiquitin-conjugating enzyme/RWD-like;Ubiquitin-conjugating enzyme, active site	0.997657	0.425697	1.83681	0.00494997	1.04849	0.0927438		b		b
BnaA08g14820D	DnaJ domain	0.384611	0.876577	-2.28754	0.00362188	-0.665566	0.451335		b		b
BnaA08g11800D	Vacuolar import/degradation, Vid27-related;WD40/YVTN repeat-like-containing domain	0.327769	0.63934	-0.144232	0.880198	-0.940536	0.0418629			c	c
BnaA07g28090D	Transcription factor, MADS-box	-0.0300882	0.995377	1.775	0.00128752	2.05156	2.95033e-05		b	c	bc
BnaC03g40620D	VQ	0.549953	0.918968	-1.6843	0.00529535	-0.711802	0.195906		b		b
BnaC06g02740D	Cytochrome P450;Cytochrome P450, E-class, group I	-0.861217	0.827593	-4.36239	0.00144653	-2.2169	0.0671509		b		b
BnaCnng76020D	Prenyltransferase/squalene oxidase;Terpene synthase, conserved site;Terpenoid cyclases/protein prenyltransferase alpha-alpha toroid;Squalene cyclase	0.395681	0.868651	1.8466	0.624174	6.1079	0.0200863			c	c
BnaC05g23720D	FAD linked oxidase, N-terminal;Berberine/berberine-like;FAD-binding, type 2;CO dehydrogenase flavoprotein-like, FAD-binding, subdomain 2	0.401774	0.945213	-1.8466	0.0432475	-2.89041	0.00121306		b	c	bc
BnaA04g10600D	Amino acid transporter, transmembrane	-0.754842	0.688484	-6.77266	0.000149544	-6.21468	0.000110766		b	c	bc
BnaA04g22640D	Protein of unknown function DUF1313	1.87218	0.77716	2.30998	0.178872	2.9524	0.0132413			c	c
BnaC01g41460D	Thaumatin;Thaumatin, conserved site	-0.684468	0.770037	-8.98685	2.60518e-05	-4.23066	0.0145863		b	c	bc
BnaC07g07970D	Amine oxidase;Mycolic acid cyclopropane synthase	-0.283795	0.801643	-1.26052	0.0400041	-0.79349	0.191479		b		b
BnaC04g05010D	Acyl carrier protein (ACP);Phosphopantetheine attachment site;Acyl carrier protein-like	0.14196	0.925746	0.93979	0.0043183	0.169103	0.690111		b		b
BnaC03g56460D	Zinc finger, RING-type;Zinc finger, RING/FYVE/PHD-type;Zinc finger, RING-type, conserved site	1.2798	0.110712	1.71245	0.00759213	1.12196	0.0902004		b		b
BnaC09g05150D	Histone deacetylase domain	-0.406866	0.447823	-1.70781	0.00755147	-1.95972	0.000819055		b	c	bc
BnaC05g03300D	Plant peroxidase;Haem peroxidase, plant/fungal/bacterial;Haem peroxidase;Peroxidases heam-ligand binding site;Peroxidase, active site	-0.473506	0.615703	-0.956666	0.0231413	-0.823294	0.0475587		b	c	bc
BnaC03g20910D	Protein kinase, catalytic domain;Legume lectin domain;Serine/threonine- / dual specificity protein kinase, catalytic domain;Concanavalin A-like lectin/glucanases superfamily;Protein kinase-like domain;Concanavalin A-like lectin/glucanase, subgroup	-0.425352	0.487614	-1.76345	0.000634322	-0.870621	0.108969		b		b
BnaC04g41140D	KIP1-like	-0.00911144	1	0.600894	0.275784	0.994864	0.0176189			c	c
BnaA09g46410D	Peptidase M24, structural domain;Peptidase M24, methionine aminopeptidase;Peptidase M24A, methionine aminopeptidase, subfamily 1	0.0395708	0.993081	0.598001	0.277852	-0.941045	0.0305132			c	c
BnaC07g32260D	no data	0.460025	0.67778	0.504247	0.255477	0.718681	0.03182			c	c
BnaA09g36600D	Glycoside hydrolase, family 17;Glycoside hydrolase, catalytic domain;Glycoside hydrolase, superfamily	-2.21955	0.639298	-3.43208	0.0145853	-1.67905	0.137315		b		b
BnaC04g08450D	UDP-glucuronosyl/UDP-glucosyltransferase	0.622757	0.410162	-1.85398	0.0325572	-2.24061	0.00325437		b	c	bc
BnaA07g24230D	Zinc finger, Dof-type	-0.49584	0.634446	-1.65448	4.8539e-06	-1.10971	0.00166827		b	c	bc
BnaC03g26850D	Aminotransferases, class-I, pyridoxal-phosphate-binding site;Aminotransferase, class I/classII;Tyrosine/nicotianamine aminotransferase;Pyridoxal phosphate-dependent transferase, major region, subdomain 1;Pyridoxal phosphate-dependent transferase, major region, subdomain 2;Pyridoxal phosphate-dependent transferase;Tyrosine transaminase	-0.551601	0.945658	-2.5554	0.0096467	-0.2445	0.838621		b		b
BnaC09g37930D	Tubulin;Alpha tubulin;Tubulin/FtsZ, GTPase domain;Beta tubulin, autoregulation binding site	0.113017	0.93601	-0.380995	0.482864	-1.06934	0.00334072			c	c
BnaC07g26560D	Gnk2-homologous domain	-0.702069	0.443522	-3.13506	1.30167e-05	-1.24867	0.082903		b		b
BnaA05g25110D	Lipase, class 3	0.657467	0.739393	0.127722	0.931291	2.43762	6.22626e-07			c	c
BnaA09g40320D	Glutaredoxin;Glutaredoxin-like, plant II;Thioredoxin-like fold;Glutaredoxin subgroup	-1.81227	0.0801767	-3.94468	1.42006e-06	-3.72485	1.74394e-07		b	c	bc
BnaC04g55480D	Guanylate kinase;Guanylate kinase/L-type calcium channel;Guanylate kinase, sub-group;Guanylate kinase, conserved site	-0.588086	0.546554	-1.57632	0.00396024	-1.05518	0.0513222		b		b
BnaAnng38340D	Plant disease resistance response protein	1.72419	0.0403141	2.00526	0.166562	-0.0474555	0.977897	a			a
BnaC08g36740D	Protein kinase, catalytic domain;Serine/threonine- / dual specificity protein kinase, catalytic domain;Serine/threonine-protein kinase, active site;Protein kinase-like domain;Tyrosine-protein kinase, catalytic domain	-0.141824	1	-9.18913	1.84213e-05	-4.93843	0.00148966		b	c	bc
BnaC03g31510D	Drug/metabolite transporter	0.590224	0.867944	1.78843	0.0135594	1.84872	0.00294751		b	c	bc
BnaC04g28150D	Clp, N-terminal;Double Clp-N motif	0.028298	0.995996	0.00275973	0.997858	1.22463	0.00566697			c	c
BnaA10g29460D	Zinc finger, CCCH-type;Ankyrin repeat;Ankyrin repeat-containing domain	0.163506	0.948642	-0.225497	0.745348	0.752022	0.0488628			c	c
BnaA07g07780D	Membrane attack complex component/perforin (MACPF) domain	-0.323458	0.942773	-1.49541	0.0256342	-0.850454	0.185043		b		b
BnaC09g08430D	Glycosyl transferase, family 28, C-terminal;Diacylglycerol glucosyltransferase, N-terminal	-1.31626	0.068927	-1.99173	0.034177	-0.602437	0.540395		b		b
BnaA10g24770D	SANT/Myb domain;Myb domain, plants;Homeodomain-like;SANT domain;Myb domain	-0.269194	0.831571	-1.48534	0.00128248	-0.763302	0.117233		b		b
BnaCnng63660D	no data	1.00863	0.307362	1.7118	0.241661	4.20508	0.000149767			c	c
BnaCnng73330D	Helix-turn-helix motif;Homeodomain;Leucine zipper, homeobox-associated;Homeodomain-like;Homeobox, conserved site	0.24083	0.904469	1.4746	0.0116455	2.35248	5.50085e-06		b	c	bc
BnaA01g37370D	Protein phosphatase 2C, manganese/magnesium aspartate binding site;Protein phosphatase 2C (PP2C)-like;Protein phosphatase 2C	0.893749	0.46972	1.45537	0.10318	2.5002	0.000535333			c	c
BnaA10g00470D	Aminotransferases, class-I, pyridoxal-phosphate-binding site;Aminotransferase, class I/classII;Pyridoxal phosphate-dependent transferase, major region, subdomain 1;Pyridoxal phosphate-dependent transferase, major region, subdomain 2;Pyridoxal phosphate-dependent transferase	-2.4118	0.482179	-5.65964	0.000177543	-2.04493	0.137584		b		b
BnaA03g08000D	Tetratricopeptide-like helical	-0.437301	0.829876	-0.664849	0.180023	0.86678	0.0337188			c	c
BnaC01g14980D	Tetraspanin/Peripherin	0.510578	0.789604	0.96745	0.137815	1.38323	0.0176812			c	c
BnaC03g15380D	no data	-0.457391	0.697662	-1.02414	0.00889429	-0.242133	0.615776		b		b
BnaC06g09800D	no data	0.0140253	1	-1.5637	0.0350898	-1.53288	0.0139502		b	c	bc
BnaC09g25870D	Short-chain dehydrogenase/reductase SDR;Glucose/ribitol dehydrogenase;NAD(P)-binding domain	-0.499696	0.345532	-1.4688	0.000171758	-0.407973	0.376253		b		b
BnaC08g26190D	Ubiquitin-conjugating enzyme, E2;Ubiquitin-conjugating enzyme/RWD-like;Ubiquitin-conjugating enzyme, active site	0.198846	0.852043	-0.543827	0.209253	-0.728803	0.0449834			c	c
BnaA01g08410D	Leucine-rich repeat-containing N-terminal, type 2	-0.286456	0.965077	-4.39145	0.00109855	-3.33494	0.00801415		b	c	bc
BnaC07g45710D	Protein kinase, catalytic domain;Serine-threonine/tyrosine-protein kinase catalytic domain;Serine/threonine- / dual specificity protein kinase, catalytic domain;Serine/threonine-protein kinase, active site;Protein kinase-like domain;Protein kinase, ATP binding site;Tyrosine-protein kinase, catalytic domain	-0.13469	0.983632	-2.90547	0.00231288	-1.48952	0.0963789		b		b
BnaC03g45140D	no data	0.666159	0.508759	1.63312	0.00482785	3.18785	1.97826e-10		b	c	bc
BnaC08g44050D	no data	-0.212056	0.975396	-1.23904	0.0270409	-0.688699	0.125522		b		b
BnaC05g41390D	Target SNARE coiled-coil domain;Syntaxin, N-terminal;Syntaxin/epimorphin, conserved site;t-SNARE	-0.313202	0.949467	-3.76101	0.00378199	-2.71113	0.0172459		b	c	bc
BnaC04g38170D	Cyclic nucleotide-binding domain;Ion transport domain;RmlC-like jelly roll fold;Cyclic nucleotide-binding-like	0.153425	0.940977	-0.88065	0.0821226	-0.985334	0.0247833			c	c
BnaA09g41460D	Aldehyde dehydrogenase domain;Aldehyde dehydrogenase, conserved site;Aldehyde/histidinol dehydrogenase;Aldehyde dehydrogenase, N-terminal;Aldehyde dehydrogenase, C-terminal	0.171	0.900513	0.691812	0.091021	0.720202	0.049358			c	c
BnaA08g01040D	RNA polymerase archaeal subunit P/eukaryotic subunit RPC10	-0.486716	0.693985	-0.192256	0.846209	-1.04387	0.0275869			c	c
BnaC07g31150D	Flavin monooxygenase-like	0.0148826	1	0.733423	0.447813	2.26857	0.000302838			c	c
BnaA07g23450D	Plant peroxidase;Haem peroxidase, plant/fungal/bacterial;Haem peroxidase;Peroxidases heam-ligand binding site;Peroxidase, active site	0.532979	0.63619	2.26288	8.55065e-05	2.83245	6.6006e-08		b	c	bc
BnaC03g73200D	Late embryogenesis abundant protein, LEA-5	0.106326	0.986342	-3.37854	0.00324398	-1.77462	0.096795		b		b
BnaC05g04490D	Phospholipid/glycerol acyltransferase	-0.70173	0.771511	0.897346	0.470859	2.80019	0.000195428			c	c
BnaC03g76620D	no data	-0.636495	0.73581	-2.47835	0.00708911	-3.568	4.85786e-05		b	c	bc
BnaC03g66590D	Plant peroxidase;Haem peroxidase, plant/fungal/bacterial;Haem peroxidase;Peroxidases heam-ligand binding site;Peroxidase, active site	-1.8753	0.472964	-1.10362	0.526175	-2.44999	0.0266037			c	c
BnaC07g26800D	Tetratricopeptide TPR-1;Tetratricopeptide-like helical;Tetratricopeptide repeat-containing domain;Tetratricopeptide repeat	1.03043	0.330859	-0.0200555	0.99289	1.83989	0.0291487			c	c
BnaA02g15230D	Bet v I domain;START-like domain;Major latex protein domain	0.368599	0.805837	2.32174	0.00783311	2.95062	0.000165285		b	c	bc
BnaA08g25770D	Signal transduction response regulator, receiver domain;CheY-like superfamily	-0.936856	0.0898349	-1.03273	0.0831196	-2.85932	1.80393e-08			c	c
BnaCnng24090D	Protein of unknown function DUF569;Actin cross-linking	0.163091	0.994647	-3.67401	0.00170027	-1.88287	0.0190917		b	c	bc
BnaA08g16860D	Basic-leucine zipper domain	0.367937	0.872717	0.257057	0.741119	1.00686	0.0148015			c	c
BnaA09g08200D	Glycosyl transferase, family 28, C-terminal;Diacylglycerol glucosyltransferase, N-terminal	-1.48302	0.0937976	-1.59429	0.0101831	-0.657949	0.299677		b		b
BnaA07g37860D	Glycoside hydrolase, family 17;X8;Glycoside hydrolase, catalytic domain;Glycoside hydrolase, superfamily	-0.70155	0.777308	-0.238564	0.871525	1.59795	0.0195735			c	c
BnaC03g39760D	Zinc finger, GATA-type;Zinc finger, NHR/GATA-type	-0.269008	0.890604	-0.108736	0.948058	-1.4924	0.0445658			c	c
BnaA06g35910D	Myc-type, basic helix-loop-helix (bHLH) domain	0.19652	0.938531	2.12854	0.0903126	3.10574	0.00539882			c	c
BnaC08g39830D	Zinc finger, RING-type;Zinc finger, RING/FYVE/PHD-type	1.0345	0.0925195	1.17474	0.0064256	0.972952	0.0232029		b	c	bc
BnaC05g43410D	Exocyst complex protein Exo70;Cullin repeat-like-containing domain	-1.86704	0.0168231	-2.64362	0.000417342	-3.8777	4.72704e-08	a	b	c	abc
BnaC03g07610D	no data	-0.3065	0.749634	-0.575271	0.536113	-2.41207	4.32983e-05			c	c
BnaC03g27680D	Transporter, high affinity nitrate, Nar2	-0.859215	0.906522	-2.65147	0.117251	-3.44941	0.00729334			c	c
BnaA06g10350D	CobW/HypB/UreG domain;Cobalamin (vitamin B12) biosynthesis CobW-like, C-terminal	0.272801	0.794606	0.987423	0.0147478	0.212058	0.677189		b		b
BnaA06g34000D	Protein kinase, catalytic domain;Serine-threonine/tyrosine-protein kinase catalytic domain;Serine/threonine- / dual specificity protein kinase, catalytic domain;Serine/threonine-protein kinase, active site;Protein kinase-like domain;Protein kinase, ATP binding site;Tyrosine-protein kinase, catalytic domain	0.286197	0.866233	-0.22019	0.779747	0.975086	0.0142662			c	c
BnaA08g03400D	Thioredoxin-like fold	0.813766	0.294128	2.45286	0.029744	3.8255	7.41123e-05		b	c	bc
BnaA10g20830D	no data	-0.101164	0.968267	0.551937	0.329234	0.904756	0.0341972			c	c
BnaA10g00620D	AP2/ERF domain;DNA-binding, integrase-type	-0.458978	0.626065	0.930089	0.227659	1.6217	0.00494367			c	c
BnaA01g36080D	no data	-0.254123	0.853279	0.0727798	0.924749	0.691782	0.0388318			c	c
BnaA09g24670D	Basic-leucine zipper domain	0.26164	0.847457	-0.202882	0.776006	0.779501	0.0397985			c	c
BnaA08g08740D	no data	2.66553	0.619049	2.84604	0.0157952	2.86598	0.000372239		b	c	bc
BnaCnng63430D	Alternative oxidase	-0.399635	0.569858	-2.27512	0.00363725	-1.57913	0.032757		b	c	bc
BnaA01g37320D	no data	-0.502141	0.928699	-3.44099	0.000579196	-2.66839	0.0024167		b	c	bc
BnaC03g75090D	Copper amine oxidase, N2/N3-terminal;Protein of unknown function DUF3223	0.205048	0.839814	0.963319	0.0211944	0.760989	0.0625501		b		b
BnaA03g23480D	Cycloeucalenol cycloisomerase	-0.266161	0.69532	-0.349987	0.649501	-1.0451	0.0323874			c	c
BnaC04g12620D	Heat shock protein 70 family;Heat shock protein 70, conserved site	0.511653	0.56729	1.86328	4.49935e-06	2.10833	1.24624e-08		b	c	bc
BnaC08g18790D	Protein of unknown function DUF1195	0.478375	0.831571	-0.846136	0.118899	-1.35442	0.00195729			c	c
BnaAnng09120D	Zinc finger, B-box	0.332838	0.874082	0.452657	0.624592	1.29837	0.0190877			c	c
BnaA09g28400D	no data	0.297726	0.905544	-1.926	0.0843924	-2.52996	0.00499844			c	c
BnaC05g50050D	Protein kinase, catalytic domain;Serine/threonine- / dual specificity protein kinase, catalytic domain;Serine/threonine-protein kinase, active site;Protein kinase-like domain;Concanavalin A-like lectin/glucanase, subgroup;Protein kinase, ATP binding site;Tyrosine-protein kinase, catalytic domain	-0.37262	0.89475	-3.63515	4.30298e-05	-3.24377	5.1458e-05		b	c	bc
BnaA06g01010D	Malectin-like carbohydrate-binding domain	-0.0838857	0.976499	-2.2118	0.0387278	-2.3177	0.0204822		b	c	bc
BnaC03g22680D	Proton-dependent oligopeptide transporter family;Major facilitator superfamily domain, general substrate transporter	-0.171783	0.868651	-0.391511	0.438813	-1.0879	0.00121673			c	c
BnaC09g18180D	Protein kinase, catalytic domain;Serine-threonine/tyrosine-protein kinase catalytic domain;Serine/threonine- / dual specificity protein kinase, catalytic domain;Gnk2-homologous domain;Serine/threonine-protein kinase, active site;Protein kinase-like domain;Concanavalin A-like lectin/glucanase, subgroup;Protein kinase, ATP binding site;Tyrosine-protein kinase, catalytic domain	0.0563496	0.997107	-3.88317	0.00127425	-2.48795	0.0253532		b	c	bc
BnaA03g34520D	Protein kinase, catalytic domain;Serine-threonine/tyrosine-protein kinase catalytic domain;Serine/threonine- / dual specificity protein kinase, catalytic domain;Protein kinase-like domain;Protein kinase, ATP binding site;Tyrosine-protein kinase, catalytic domain	-0.306059	0.903648	-3.10407	0.000856025	-2.10644	0.0141836		b	c	bc
BnaA09g15190D	Ribosomal protein L21e;Translation protein SH3-like domain;Ribosomal protein L21e, conserved site	-0.0599127	0.973448	0.1094	0.942998	-1.49533	0.020739			c	c
BnaAnng10700D	Ribose/galactose isomerase;RmlC-like cupin domain;DNA-damage-repair/toleration protein, DRT102;Cupin 2, conserved barrel;RmlC-like jelly roll fold	0.329109	0.552505	0.929568	0.0458469	0.748838	0.0868858		b		b
BnaC07g23800D	Protein kinase, catalytic domain;Serine-threonine/tyrosine-protein kinase catalytic domain;Serine/threonine- / dual specificity protein kinase, catalytic domain;Serine/threonine-protein kinase, active site;Protein kinase-like domain;Concanavalin A-like lectin/glucanase, subgroup;Protein kinase, ATP binding site;Tyrosine-protein kinase, catalytic domain	-0.727195	0.28771	-0.515358	0.468105	-1.2777	0.0140258			c	c
BnaC06g35740D	Protein of unknown function DUF581	0.33364	0.782762	1.1741	0.00904936	0.705779	0.105279		b		b
BnaA08g10850D	Phospholipase-like, arabidopsis	-0.775721	0.631358	-5.52191	8.28778e-08	-3.72846	4.54312e-05		b	c	bc
BnaC03g11850D	Oxoglutarate/iron-dependent dioxygenase;Non-haem dioxygenase N-terminal domain	-0.266275	0.972022	-4.81361	0.00131963	-6.19463	1.44547e-05		b	c	bc
BnaCnng09050D	no data	0.321795	0.81779	1.95359	0.000485941	1.73813	0.000930804		b	c	bc
BnaC05g05560D	Lateral organ boundaries, LOB	-1.13338	0.79051	-3.43981	0.0059724	0.215432	0.894242		b		b
BnaC05g03130D	Protein kinase, catalytic domain;Serine/threonine- / dual specificity protein kinase, catalytic domain;Serine/threonine-protein kinase, active site;Protein kinase-like domain;Protein kinase, ATP binding site;Tyrosine-protein kinase, catalytic domain	-0.849245	0.834335	0.306608	0.784884	1.7621	1.24535e-05			c	c
BnaA08g25230D	no data	-1.4509	0.468905	0.724411	0.310305	1.6862	0.00020724			c	c
BnaA02g33650D	Zinc finger, TAZ-type;BTB/POZ-like;BTB/POZ fold;BTB/POZ	1.23828	0.120392	1.6843	0.387809	3.31847	0.0478737			c	c
BnaC06g30250D	Glycolipid transfer protein domain	0.617306	0.956527	-3.41423	0.045148	-2.49932	0.0621697		b		b
BnaC07g41210D	Protein of unknown function DUF506, plant	1.41795	0.168999	3.24074	1.82259e-05	3.62527	5.52943e-07		b	c	bc
BnaC03g52480D	Protein kinase, catalytic domain;Serine/threonine- / dual specificity protein kinase, catalytic domain;Serine/threonine-protein kinase, active site;EF-hand-like domain;Protein kinase, ATP binding site;Tyrosine-protein kinase, catalytic domain	0.74674	0.663042	-1.57389	0.0189976	-1.01895	0.113761		b		b
BnaCnng37330D	Domain of unknown function DUF3700	0.555197	0.474747	0.647147	0.702538	2.87315	0.0058828			c	c
BnaC09g00700D	Protein phosphatase 2C (PP2C)-like;Protein phosphatase 2C	0.263548	0.801599	0.427502	0.362385	-0.782922	0.0251634			c	c
BnaA07g29310D	Leucine-rich repeat;Leucine-rich repeat, typical subtype;Leucine-rich repeat-containing N-terminal, type 2;Leucine rich repeat 4	-0.736631	0.591118	-3.67173	0.000104129	-3.10032	0.000401307		b	c	bc
BnaC05g51310D	Peptidase S8/S53 domain;Protease-associated domain, PA;Proteinase inhibitor I9;Peptidase S8, subtilisin-related;Peptidase S8, subtilisin, His-active site;Peptidase S8, subtilisin, Asp-active site;Peptidase S8, subtilisin, Ser-active site	1.71858	0.788521	-3.65841	0.119436	-5.45169	0.00539447			c	c
BnaA05g33820D	Protein kinase, catalytic domain;Serine-threonine/tyrosine-protein kinase catalytic domain;Serine/threonine- / dual specificity protein kinase, catalytic domain;Serine/threonine-protein kinase, active site;Protein kinase-like domain;Tyrosine-protein kinase, catalytic domain	0.701482	0.357417	0.96067	0.0422171	0.869684	0.0458332		b	c	bc
BnaC09g26080D	Nucleoside diphosphate kinase	-0.170879	0.93302	0.167523	0.853907	1.0768	0.0154093			c	c
BnaA07g19630D	Protein of unknown function DUF1677, plant	-0.56102	0.353706	-0.791177	0.211408	-1.3807	0.00553355			c	c
BnaA01g31480D	Pectinesterase, catalytic;Pectinesterase inhibitor;Pectin lyase fold/virulence factor;Pectin lyase fold;Pectinesterase, active site	0.0261283	0.999527	-1.50311	0.0158056	-1.06777	0.0867856		b		b
BnaC01g19640D	Domain of unknown function DUF3700	1.08305	0.0163316	0.361611	0.683517	0.328832	0.618991	a			a
BnaC05g45320D	Six-hairpin glycosidase-like;Glycosyl hydrolase family 100	-0.242219	0.862995	-0.267367	0.745019	1.22448	0.00536531			c	c
BnaC03g22750D	Expansin;Expansin/pollen allergen, DPBB domain;Expansin, cellulose-binding-like domain;Expansin/Lol pI;Barwin-related endoglucanase;Barwin-like endoglucanase	1.29722	0.00898884	0.881385	0.014989	-1.25071	0.000931096	a	b	c	abc
BnaAnng06210D	Tetrapyrrole biosynthesis, hydroxymethylbilane synthase;Porphobilinogen deaminase, N-terminal;Porphobilinogen deaminase, C-terminal;Porphobilinogen deaminase, dipyrromethane cofactor binding site	0.0757556	0.964389	1.0405	0.000743811	0.418853	0.241059		b		b
BnaA08g13650D	Rab-GTPase-TBC domain	-0.40331	0.828643	-2.00836	0.00582348	-1.93041	0.00356397		b	c	bc
BnaUnng03000D	no data	-0.696632	0.265734	1.02917	0.327072	2.42006	0.000973901			c	c
BnaC04g41050D	DNA-binding WRKY	-0.561146	0.898477	-2.83749	5.83027e-05	-2.24227	0.000532506		b	c	bc
BnaC08g49000D	Glycoside hydrolase, family 28;Pectin lyase fold/virulence factor;Pectin lyase fold	0.456366	0.71693	1.1108	0.00987112	0.615812	0.185761		b		b
BnaC03g46730D	Phospholipase-like, arabidopsis	-0.0142875	1	-2.32479	0.00115863	-1.30143	0.0793988		b		b
BnaC04g08990D	Inosine/uridine-preferring nucleoside hydrolase domain;Inosine/uridine-preferring nucleoside hydrolase	-0.627964	0.354508	-1.08593	0.00301763	-0.709633	0.059132		b		b
BnaA03g32230D	no data	0.180609	0.892579	-0.063177	0.941425	1.40922	1.74301e-05			c	c
BnaA09g40400D	FAD linked oxidase, N-terminal;Cytokinin dehydrogenase 1, FAD/cytokinin binding domain;FAD-linked oxidase-like, C-terminal;FAD-binding, type 2;CO dehydrogenase flavoprotein-like, FAD-binding, subdomain 2;Vanillyl-alcohol oxidase/Cytokinin dehydrogenase C-terminal domain	-0.379581	0.870331	-0.14436	0.922915	1.42185	0.0283669			c	c
BnaA09g53480D	Sulfotransferase domain	0.0383869	0.99562	0.606846	0.282228	1.69258	9.08816e-06			c	c
BnaC07g17020D	Protein kinase, catalytic domain;Serine-threonine/tyrosine-protein kinase catalytic domain;Serine/threonine- / dual specificity protein kinase, catalytic domain;Serine/threonine-protein kinase, active site;Protein kinase-like domain;Concanavalin A-like lectin/glucanase, subgroup;Protein kinase, ATP binding site;Tyrosine-protein kinase, catalytic domain;Malectin;Leucine rich repeat 4	-0.328274	0.73744	-1.11165	0.0167002	-1.52075	0.000245929		b	c	bc
BnaA03g40850D	Protein kinase, catalytic domain;Serine/threonine- / dual specificity protein kinase, catalytic domain;Serine/threonine-protein kinase, active site;Protein kinase-like domain;Protein kinase, ATP binding site;Tyrosine-protein kinase, catalytic domain	0.583502	0.267297	0.996385	0.00142104	1.06273	0.000521007		b	c	bc
BnaA07g27170D	no data	-1.65038	0.342412	-0.939096	0.0826443	-1.20256	0.00522805			c	c
BnaCnng36670D	no data	0.834063	0.0360029	0.955892	0.0933697	0.73115	0.172173	a			a
BnaCnng05550D	no data	0.357271	0.890604	0.146359	0.819064	0.743345	0.0251566			c	c
BnaA08g11650D	Carboxyl transferase;Acetyl-coenzyme A carboxyltransferase, N-terminal;Acetyl-coenzyme A carboxyltransferase, C-terminal	0.298199	0.634303	0.783964	0.0187239	-0.0382137	0.939213		b		b
BnaC08g27200D	Heavy metal-associated domain, HMA	0.745121	0.124356	-0.0749205	0.943979	0.904928	0.04163			c	c
BnaC07g17230D	no data	-0.456713	0.579353	-1.34001	0.00137696	-0.824744	0.0555056		b		b
BnaA03g27360D	no data	0.289951	0.905372	0.147449	0.820531	0.858643	0.00852897			c	c
BnaC04g14500D	DNA-binding WRKY	-0.818683	0.900428	-3.86138	0.00269439	-3.10293	0.00204793		b	c	bc
BnaC04g41700D	Protein kinase, catalytic domain;Serine-threonine/tyrosine-protein kinase catalytic domain;Serine/threonine- / dual specificity protein kinase, catalytic domain;Serine/threonine-protein kinase, active site;Protein kinase-like domain;Protein kinase, ATP binding site;Tyrosine-protein kinase, catalytic domain;Armadillo repeat-containing protein 3 and Serine/threonine-protein kinase CTR1	-0.661712	0.525437	-0.341172	0.798534	-1.58173	0.0220038			c	c
BnaA03g13730D	no data	-0.247103	0.970981	-1.92442	0.00126663	0.251329	0.739139		b		b
BnaC02g05530D	Major facilitator superfamily;Major facilitator superfamily domain, general substrate transporter;Major facilitator superfamily domain	-0.525099	0.874309	0.303325	0.856799	1.76337	0.0263641			c	c
BnaA09g07490D	F-box domain, cyclin-like;Leucine-rich repeat, cysteine-containing subtype	0.312923	0.850299	-1.14106	0.0114273	-1.14197	0.00588461		b	c	bc
BnaA06g08160D	ACT domain	-0.320526	0.674045	-1.02651	0.00550816	-0.673691	0.0774226		b		b
BnaA01g08860D	Inositol polyphosphate-related phosphatase;Endonuclease/exonuclease/phosphatase	-0.367828	0.966221	-2.48074	0.00943565	-1.43085	0.0596911		b		b
BnaC01g09950D	Leucine-rich repeat-containing N-terminal, type 2	-1.79195	0.54637	-2.93827	0.0229676	-1.49381	0.212667		b		b
BnaC05g05130D	RNA recognition motif domain;Nucleotide-binding, alpha-beta plait	2.02173	1.12132e-06	2.66942	3.20387e-12	3.95054	2.9016e-26	a	b	c	abc
BnaA02g35970D	NmrA-like;NAD(P)-binding domain	0.673315	0.903244	-3.91732	0.00259062	-0.0362154	0.982955		b		b
BnaA06g26680D	DNA-binding WRKY	-1.0983	0.762095	-6.99929	2.53224e-05	-2.45039	0.0536196		b		b
BnaA03g22000D	Short-chain dehydrogenase/reductase SDR;Glucose/ribitol dehydrogenase;NAD(P)-binding domain	-0.0116631	1	0.14007	0.863929	0.953393	0.0132413			c	c
BnaA04g23710D	Myc-type, basic helix-loop-helix (bHLH) domain	-0.167812	0.921206	-0.376212	0.471918	-1.22303	0.00085972			c	c
BnaA05g28340D	Globin;Leghaemoglobin;Globin-like;Globin, structural domain;Leghaemoglobin, iron-binding site	-0.180471	0.895466	-0.4767	0.421612	-1.31656	0.000907072			c	c
BnaA01g12590D	Protein kinase, catalytic domain;Serine-threonine/tyrosine-protein kinase catalytic domain;Serine/threonine- / dual specificity protein kinase, catalytic domain;Gnk2-homologous domain;Serine/threonine-protein kinase, active site;Protein kinase-like domain;Concanavalin A-like lectin/glucanase, subgroup;Protein kinase, ATP binding site;Tyrosine-protein kinase, catalytic domain	-0.674232	0.665975	-3.90131	1.35229e-05	-1.99591	0.0167214		b	c	bc
BnaA05g24730D	Protein kinase, catalytic domain;Serine-threonine/tyrosine-protein kinase catalytic domain;Leucine-rich repeat;Serine/threonine- / dual specificity protein kinase, catalytic domain;Serine/threonine-protein kinase, active site;Protein kinase-like domain;Tyrosine-protein kinase, catalytic domain;Malectin	-0.52921	0.624972	-4.05745	7.45745e-05	-4.12753	9.86624e-06		b	c	bc
BnaA09g05760D	no data	0.398847	0.789604	1.54362	0.00425921	1.20543	0.022264		b	c	bc
BnaA03g18540D	Mannose-binding lectin	0.169076	0.943825	0.54338	0.788346	2.54161	0.0180767			c	c
BnaC06g21200D	ACT domain	-0.528353	0.210305	-0.608538	0.114267	-0.903289	0.00524191			c	c
BnaA08g07360D	Lipase, GDSL;SGNH hydrolase-type esterase domain	0.375799	0.914143	1.99808	0.00960357	-1.89336	0.0123954		b	c	bc
BnaCnng04910D	no data	-0.228781	0.865219	-1.04742	0.00494102	0.251555	0.581911		b		b
BnaA10g16080D	AWPM-19-like	0.547622	0.549521	-0.00797547	0.994156	0.841712	0.0485379			c	c
BnaC08g22140D	Protein of unknown function DUF4228	1.4192	0.0228216	0.676775	0.276068	0.904529	0.0699752	a			a
BnaC07g15380D	Dehydrin	-0.43827	0.880418	-0.0891613	0.941797	1.18765	0.0175697			c	c
BnaC09g10900D	Peptidase C13, legumain	0.101338	0.988505	1.28145	0.141381	1.85717	0.0062966			c	c
BnaA08g21390D	EGF-type aspartate/asparagine hydroxylation site;Protein kinase, catalytic domain;Epidermal growth factor-like domain;EGF-like calcium-binding;Serine/threonine- / dual specificity protein kinase, catalytic domain;Serine/threonine-protein kinase, active site;Protein kinase-like domain;EGF-like calcium-binding, conserved site;Tyrosine-protein kinase, catalytic domain;Wall-associated receptor kinase…	1.04856	0.522791	-3.10604	0.0189718	-3.30683	0.00669465		b	c	bc
BnaA09g50460D	Leucine-rich repeat;Leucine rich repeat 4	0.19012	0.916605	-3.05091	0.00237194	-1.70144	0.078405		b		b
BnaC08g06690D	Annexin;Annexin, plant;Annexin repeat, conserved site;Annexin repeat	-0.984231	0.487614	0.516724	0.624413	1.72236	0.00543259			c	c
BnaA08g18660D	Pyridoxal phosphate-dependent decarboxylase;Pyridoxal phosphate-dependent transferase, major region, subdomain 1;Pyridoxal phosphate-dependent transferase	-0.160483	0.950443	-1.86434	0.0100411	-2.71125	2.58001e-05		b	c	bc
BnaA09g14900D	Sulfotransferase domain	-1.92424	0.782031	-9.75625	0.000178188	-9.01042	0.000136644		b	c	bc
BnaA09g28810D	Leucine-rich repeat	-0.783535	0.933707	-6.31097	0.00142968	-4.06271	0.0013986		b	c	bc
BnaC01g04250D	UDP-glucuronosyl/UDP-glucosyltransferase	-0.536649	0.925142	-6.07085	5.83027e-05	-5.76434	1.74301e-05		b	c	bc
BnaA03g57280D	Dormancyauxin associated	1.71753	4.42349e-06	0.931791	0.0515423	-0.236796	0.674809	a			a
BnaC04g51920D	Mitochondrial carrier protein;Mitochondrial substrate/solute carrier;Mitochondrial carrier domain	-0.478682	0.463159	-0.927615	0.00409976	-0.955357	0.00195316		b	c	bc
BnaC05g10460D	Zinc finger, RING-type;Zinc finger, RING/FYVE/PHD-type	1.72978	1.8605e-06	2.15913	3.14375e-08	1.76028	4.40987e-06	a	b	c	abc
BnaC06g35700D	Signal transduction response regulator, receiver domain;CheY-like superfamily	-1.13805	0.0900057	-0.214637	0.929605	-3.25304	0.0142845			c	c
BnaA09g11480D	6-phosphogluconate dehydrogenase, NADP-binding;NAD(P)-binding domain	0.104041	0.956627	0.953099	0.025678	0.856227	0.0361122		b	c	bc
BnaA03g32650D	ABC transporter, transmembrane domain;ABC transporter-like;AAA+ ATPase domain;ABC transporter, transmembrane domain, type 1;ABC transporter, conserved site;ABC transporter, integral membrane type 1	0.511631	0.874931	-5.37542	0.00336823	-5.67175	0.000334926		b	c	bc
BnaA06g07470D	AP2/ERF domain;B3 DNA binding domain;DNA-binding pseudobarrel domain;DNA-binding, integrase-type	-0.410844	0.818374	-0.936064	0.00878839	0.164818	0.719173		b		b
BnaCnng27730D	Pyridine nucleotide-disulphide oxidoreductase, class-II;FAD-dependent pyridine nucleotide-disulphide oxidoreductase;Pyridine nucleotide-disulphide oxidoreductase, FAD/NAD(P)-binding domain	-0.0994954	0.979094	-1.03378	0.00164877	-0.480527	0.160559		b		b
BnaA03g42240D	Armadillo-like helical;Condensin-2 complex subunit D3;Armadillo-type fold;Condensin subunit 1/Condensin-2 complex subunit D3	0.393036	0.766617	0.364994	0.663753	-1.29273	0.00966967			c	c
BnaA07g19750D	Paired amphipathic helix;Helicase-like, DEXD box c2 type;ATP-dependent helicase, C-terminal;DEAD2;Helicase, superfamily 1/2, ATP-binding domain;Helicase, superfamily 1/2, ATP-binding domain, DinG/Rad3-type	0.0433562	0.990393	-0.299816	0.883513	-2.51732	0.0172521			c	c
BnaA02g11850D	no data	-0.362874	0.850362	-0.643313	0.109579	-0.698391	0.0440885			c	c
BnaA04g07030D	Short-chain dehydrogenase/reductase SDR;NAD(P)-binding domain	1.92874	0.660985	-3.49295	0.00535671	-4.55846	4.74174e-06		b	c	bc
BnaA01g29130D	PMR5 N-terminal domain;PC-Esterase	0.149257	0.98981	-3.02748	0.0242432	-3.79206	0.000591339		b	c	bc
BnaA03g45200D	no data	0.777427	0.405022	1.47488	0.00125331	0.877921	0.0639951		b		b
BnaA06g33790D	SPX, N-terminal;EXS, C-terminal	0.473074	0.937024	1.72251	0.00729382	3.15742	4.82084e-15		b	c	bc
BnaAnng06860D	Amino acid transporter, transmembrane	-0.645077	0.135668	0.000720797	0.999377	0.813859	0.0262448			c	c
BnaAnng32020D	Methyladenine glycosylase;DNA glycosylase	0.438501	0.643688	0.655064	0.380857	1.36646	0.0138189			c	c
BnaA09g43510D	Phospholipase-like, arabidopsis	-0.311827	0.883331	-1.11194	0.0024633	-1.27782	0.000164828		b	c	bc
BnaA07g11070D	O-methyltransferase, family 2;Winged helix-turn-helix transcription repressor DNA-binding domain;Plant methyltransferase dimerisation;Caffeate O-methyltransferase (COMT) family	-0.0902544	0.997677	-6.30517	7.89169e-05	-4.99682	0.000483098		b	c	bc
BnaA09g46440D	Cation-transporting P-type ATPase;Phospholipid-transporting P-type ATPase, subfamily IV;P-type ATPase, A domain;P-type ATPase, phosphorylation site;HAD-like domain;P-type ATPase, cytoplasmic domain N	0.0122421	1	-3.69812	0.00111954	-1.91246	0.0764644		b		b
BnaA06g11330D	no data	-0.704208	0.568388	0.0259448	0.982565	1.15764	0.00485363			c	c
BnaA05g12930D	Late embryogenesis abundant protein, LEA-14	-0.124009	1	-3.95394	0.008162	-6.50304	2.92163e-05		b	c	bc
BnaA01g29140D	Protein kinase, catalytic domain;Serine-threonine/tyrosine-protein kinase catalytic domain;Leucine-rich repeat;Serine/threonine- / dual specificity protein kinase, catalytic domain;Serine/threonine-protein kinase, active site;Protein kinase-like domain;Concanavalin A-like lectin/glucanase, subgroup;Tyrosine-protein kinase, catalytic domain;Malectin	-0.51708	0.86804	-5.02464	5.15628e-05	-4.84667	1.62894e-05		b	c	bc
BnaA01g13210D	Protein BYPASS-related	-0.950793	0.667226	-0.0285761	0.98386	1.09529	0.0236435			c	c
BnaC01g15870D	Glycoside hydrolase, family 37;Six-hairpin glycosidase-like;Glycoside hydrolase, family 37, conserved site	-0.913367	0.803203	-3.26775	0.0194424	-2.95269	0.0173361		b	c	bc
BnaC07g25880D	Glycosyl-phosphatidyl inositol-anchored, plant;COBRA-like	-1.07449	0.211377	-1.10487	0.0273362	-0.597234	0.24882		b		b
BnaC04g27640D	Lipase, GDSL;SGNH hydrolase-type esterase domain	0.293461	0.786478	0.476107	0.354325	0.804149	0.0433956			c	c
BnaC05g06800D	Nicotianamine synthase	-0.683994	0.470477	-1.00835	0.0229118	-1.48446	0.000170497		b	c	bc
BnaAnng32610D	DNA-binding WRKY	-2.37947	0.486246	-5.46243	1.44833e-05	-3.59879	0.000772764		b	c	bc
BnaC09g11110D	no data	1.2738	0.290944	0.906866	0.144256	1.06871	0.0121454			c	c
BnaC04g53090D	Bifunctional inhibitor/plant lipid transfer protein/seed storage helical domain	0.332941	0.643171	0.864085	0.0429915	1.13228	0.00290037		b	c	bc
BnaC08g49490D	no data	0.187303	0.855406	0.244165	0.666586	0.673485	0.0493718			c	c
BnaA10g16900D	no data	0.125925	0.978364	0.552589	0.580486	-2.2402	0.00159296			c	c
BnaC03g01170D	Acylphosphatase-like;Acylphosphatase, conserved site;Acylphosphatase	-0.223339	0.853221	0.716874	0.173816	1.32569	0.00134015			c	c
BnaAnng23740D	BRO1 domain;ALIX V-shaped domain	-0.19147	0.866114	-1.04244	0.0432253	-0.64594	0.203522		b		b
BnaA07g21420D	Protein kinase, catalytic domain;Serine-threonine/tyrosine-protein kinase catalytic domain;Serine/threonine- / dual specificity protein kinase, catalytic domain;Serine/threonine-protein kinase, active site;Protein kinase-like domain;Protein kinase, ATP binding site;Tyrosine-protein kinase, catalytic domain	-2.69233	0.624898	-3.91764	0.035291	-3.66682	0.0144538		b	c	bc
BnaA01g15780D	Mitochondrial inner membrane translocase subunit Tim17/Tim22/Tim23/peroxisomal protein PMP24	0.432606	0.652783	1.7392	1.88381e-05	0.593714	0.18408		b		b
BnaA09g38090D	no data	-0.346108	0.942731	-1.60894	0.0350366	-0.224386	0.799011		b		b
BnaAnng04390D	Heavy metal-associated domain, HMA	0.376984	0.948288	2.3417	0.0661587	3.66634	0.000467267			c	c
BnaA09g44880D	NB-ARC	-1.90826	0.319565	-2.70204	0.00146641	-2.40649	0.00320479		b	c	bc
BnaC06g37650D	no data	-0.563646	0.909268	-3.84632	0.00068178	-3.1866	0.00165987		b	c	bc
BnaC06g22820D	Isochorismate synthase;ADC synthase;Chorismate binding, C-terminal	0.709827	0.402946	-2.18237	0.0230439	-0.291039	0.808885		b		b
BnaA09g36860D	Guanylate kinase;Guanylate kinase/L-type calcium channel;Ribonuclease H-like domain;Guanylate kinase, sub-group;Guanylate kinase, conserved site;Domain of unknown function DUF4371	-0.826369	0.240554	-0.959724	0.0378888	-0.18151	0.75284		b		b
BnaC06g23700D	Proteinase inhibitor I3, Kunitz legume;Kunitz inhibitor ST1-like	-2.79803	0.612273	-5.1353	0.00455203	-3.30114	0.0218242		b	c	bc
BnaA07g27250D	Glycolipid transfer protein domain	2.70705	0.638755	-3.38896	0.00701663	-0.163421	0.884148		b		b
BnaC08g27510D	Protein kinase, catalytic domain;Serine-threonine/tyrosine-protein kinase catalytic domain;Leucine-rich repeat;Serine/threonine- / dual specificity protein kinase, catalytic domain;Serine/threonine-protein kinase, active site;Protein kinase-like domain;Leucine-rich repeat-containing N-terminal, type 2;Concanavalin A-like lectin/glucanase, subgroup;Protein kinase, ATP binding site;Tyrosine-protein…	0.423475	0.909144	-2.67354	0.0294442	-1.65338	0.154211		b		b
BnaC02g17500D	Pectate lyase/Amb allergen;Pectin lyase fold/virulence factor;Pectin lyase fold;AmbAllergen	0.359448	0.856365	-0.00919937	0.995868	-1.53402	0.0204973			c	c
BnaA03g32320D	Heat shock protein 70 family;Heat shock protein 70, conserved site	-0.0406737	0.990501	0.956369	0.0862061	3.15714	2.22505e-12			c	c
BnaA09g31080D	Galactose oxidase, beta-propeller	0.981656	0.00158589	0.155335	0.8664	0.155923	0.797795	a			a
BnaUnng00040D	C2 calcium-dependent membrane targeting;C2 calcium/lipid-binding domain, CaLB;C2 membrane targeting protein	-0.578949	0.302928	-0.156547	0.879088	-1.0119	0.0385319			c	c
BnaC09g06780D	Acyl-CoA oxidase, C-terminal;Acyl-CoA oxidase/dehydrogenase, type 1;Acyl-CoA oxidase/dehydrogenase, central domain;Acyl-CoA dehydrogenase/oxidase C-terminal;Acyl-CoA dehydrogenase/oxidase;Acyl-CoA oxidase;Acyl-CoA dehydrogenase/oxidase, N-terminal	0.906952	0.00133081	0.963869	0.0217977	0.873366	0.0296199	a	b	c	abc
[truncated: 9,748 more rows]
