# Supplementary material for: Transcriptomic, Metabolomic and Ionomic Analyses Reveal Early Modulation of Leaf Mineral Content in Brassica napus under Mild or Severe Drought
Source: Int J Mol Sci. 2022 Jan 11;23(2):781. doi: 10.3390/ijms23020781 (PMC8776245; doi:10.3390/ijms23020781)
Supplement: Supplementary file 1 [file ijms-23-00781-s001.zip › Supplementary Data 4.xlsx]

## Sheet: Legend
Metabolomics data of Brassica napus leaves developped during a water deficit (WD)

## Sheet: Metabolites
				Normalised abundance
				5d-Control					5d-WD					11d-Control					11d-WD					20d-Control					20d-WD					VIP			Identification
Compound	Mode	m/z	Retention time (min)	R1	R2	R3	R4	R5	R1	R2	R3	R4	R5	R1	R2	R3	R4	R5	R1	R2	R3	R4	R5	R1	R2	R3	R4	R5	R1	R2	R3	R4	R5	VIP>2 5d	VIP>2 11d	VIP>2 20d	Putative identification	Adducts	Formula	Mass Error (ppm)	Isotope Similarity (%)
1,77_307,0823m/z	POS	307.082	1.77363	932147	1.02904e+06	1.14976e+06	1.74811e+06	1.16646e+06	1.05117e+06	1.57519e+06	1.66458e+06	1.17342e+06	1.33734e+06	826046	1.15911e+06	2.01946e+06	1.11599e+06	847808	1.46492e+06	2.07103e+06	2.80336e+06	2.28421e+06	2.27117e+06	667404	758792	383897	580007	1.7291e+06	1.51902e+06	1.23497e+06	1.02737e+06	1.13819e+06	1.08924e+06	x	x	x	(+)-Gallocatechin	M+H	C15H14O7	3.64311	83.549
6,08_167,1063m/z	POS	167.106	6.07795	637614	427086	427992	628580	550739	704481	593690	342279	419689	388127	696701	483387	535050	426244	980089	694271	628348	432423	590991	499921	620630	623144	608609	795674	694327	447220	406392	691828	502798	637563			x	(1R)-bornane-2,5-dione	M+H	C10H14O2	-2.23699	95.9196
0,91_84,0799m/z	POS	84.0799	0.90815	7553.56	8687.11	8263.43	9696.81	7391.47	8526.34	14058.1	15693.8	11481.8	15540.1	6408.26	5668.49	48357.1	4695.26	164309	19860.6	17681.4	23778.1	20540	24370.3	68230.4	300002	23426.9	129691	255775	33066.6	22877.9	33256.8	27295.1	31197.3			x	(1Z,2S)-2-methylbutanal oxime	M+H-H2O	C5H11NO	-9.0364	95.4434
7,49_740,5224m/z	NEG	740.522	7.49185	818276	526532	786864	757236	436331	513426	1.01298e+06	607209	76661.2	229814	1.00779e+06	297717	1.54848e+06	785489	853205	1.1159e+06	662337	673537	1.07399e+06	412111	1.05045e+06	1.44185e+06	723530	726340	198799	376318	809847	1.05039e+06	532477	1.37913e+06	x			(21R)-27-Amino-24-hydroxy-24-oxido-18-oxo-19,23,25-trioxa-24lambda~5~-phosphaheptacosan-21-yl (9Z,12Z,15Z)-9,12,15-octadecatrienoate	M-H	C41H76NO8P	-1.59325	78.7252
3,57_210,0528n	POS	193.049	3.57413	584421	853997	763332	562808	566320	734166	535473	566673	617835	691025	1.24335e+06	802968	684961	711452	604680	570885	715987	406685	726478	612840	273653	199855	546499	327592	381862	860037	810404	866811	777016	892250		x	x	(2E)-3-(2,4-Dihydroxy-5-methoxyphenyl)acrylic acid	M+H-H2O, M+H	C10H10O5	-0.252475	95.1714
3,79_208,0373m/z	NEG	208.037	3.78828	813511	1.00839e+06	910959	957545	805863	731654	904013	839713	934633	1.05681e+06	964140	790803	790988	639046	871860	1.05797e+06	1.03718e+06	962988	1.37826e+06	1.60696e+06	493469	541492	692930	645896	940150	1.34492e+06	1.33148e+06	1.59886e+06	792855	1.30609e+06		x		(2E)-3-(3,4-Dihydroxy-5-methoxyphenyl)acrylate	M-H	C10H9O5-	-4.82587	94.3197
0,55_381,0792m/z	POS	381.079	0.55205	4.34684e+06	4.23146e+06	4.23421e+06	4.81636e+06	3.79462e+06	6.131e+06	4.3862e+06	5.33222e+06	4.97631e+06	4.73586e+06	5.45337e+06	5.20524e+06	5.17811e+06	5.16051e+06	4.89376e+06	3.94281e+06	3.16573e+06	3.28335e+06	3.49164e+06	3.36273e+06	4.03761e+06	2.91672e+06	6.25074e+06	5.65126e+06	4.36314e+06	4.71312e+06	4.24847e+06	4.13357e+06	4.13653e+06	6.45391e+06	x	x	x	(2E)-3-(4-Hydroxy-3,5-dimethoxyphenyl)acrylic (2S,3S,4S,5R)-3,4,5-trihydroxy-6-oxotetrahydro-2H-pyran-2-carboxylic anhydride	M+H-H2O	C17H18O11	-5.97186	89.8795
0,55_325,0943n	POS	308.091	0.55205	645663	631763	678236	684081	669743	744075	599694	569287	621162	643939	978517	670121	548851	493927	959888	234947	204066	200570	102864	123334	461548	429323	626320	548019	556733	134117	91368.7	165475	104743	136053		x	x	(2E)-3-[2-(Hexopyranosyloxy)phenyl]acrylate	M+H-H2O, M+Na	C15H17O8-	4.30173	92.837
4,26_289,1340m/z	POS	289.134	4.25578	122981	34669.7	83263.5	251860	135229	83963.1	106679	173628	270459	119214	21199.4	51676.3	60986.2	52969.5	6376.22	47292.8	52822	323674	157469	119468	1904.45	1057.24	3480.98	1542.57	6324.28	3255.19	2753.35	1262.81	6471.54	3139.97		x		(2E)-N-[2-(5-Hydroxy-1H-indol-3-yl)ethyl]-3-phenylacrylamide	M+H-H2O	C19H18N2O2	1.35675	90.3046
9,39_819,5256m/z	NEG	819.526	9.3913	4.79197e+06	1.31454e+06	5.66782e+06	2.26112e+06	1.08232e+06	4.44066e+06	8.05436e+06	6.26927e+06	1.0651e+06	6.99906e+06	7.22832e+06	7.44421e+06	7.25461e+06	7.17586e+06	6.66442e+06	1.01773e+07	6.93294e+06	6.72404e+06	6.31485e+06	7.81384e+06	7.83623e+06	8.18642e+06	9.12053e+06	6.57147e+06	7.93142e+06	9.34164e+06	5.20202e+06	4.32413e+06	4.50347e+06	5.93165e+06	x		x	(2S)-3-(beta-D-Galactopyranosyloxy)-1,2-propanediyl (9Z,12Z,15Z,9'Z,12'Z,15'Z)bis(-9,12,15-octadecatrienoate)	M+FA-H	C45H74O10	-1.01559	93.983
8,83_936,5805n	NEG	981.579	8.8286	6.51502e+06	2.77473e+06	5.4045e+06	2.66353e+06	1.9087e+06	4.38659e+06	6.30365e+06	5.12229e+06	1.40157e+06	6.36235e+06	6.34799e+06	5.66074e+06	7.00213e+06	5.99411e+06	6.45452e+06	9.60325e+06	5.29154e+06	5.23131e+06	5.67054e+06	7.28497e+06	7.00693e+06	9.60877e+06	7.03541e+06	5.8306e+06	5.77089e+06	7.08697e+06	5.0116e+06	5.59262e+06	4.6673e+06	5.5075e+06	x		x	(2S)-3-{[6-O-(beta-D-Galactopyranosyl)-beta-D-galactopyranosyl]oxy}-1,2-propanediyl (9Z,12Z,15Z,9'Z,12'Z,15'Z)bis(-9,12,15-octadecatrienoate)	M-H, M+FA-H	C51H84O15	-0.570504	93.5282
10,35_531,4096m/z	POS	531.41	10.3492	110584	151278	101142	183307	56661.2	28263.1	40177	158816	117670	26034.4	106849	32535.8	30399.7	50784.6	133522	56869.1	8801.98	52067.9	60884.3	70440.4	75588	126624	21887.2	8546.17	11381.2	28547.4	49950.4	79418.5	34319.1	81025.9	x			(3beta)-cholest-5-en-3-yl D-glucopyranoside	M+H-H2O	C33H56O6	9.41292	82.2053
6,60_1049,5605m/z	POS	1049.56	6.59587	402001	499440	700830	354291	409442	789226	719634	842574	483065	716274	1.02573e+06	776698	650074	842234	939893	638855	659720	682854	879623	747069	508876	585310	1.35858e+06	970218	862030	901588	757120	982655	796808	1.02831e+06	x	x		(3beta,17xi,22R,25R)-26-(beta-D-Glucopyranosyloxy)-22-hydroxyfurost-5-en-3-yl 6-deoxy-alpha-L-mannopyranosyl-(1->2)-[6-deoxy-alpha-L-mannopyranosyl-(1->4)]-beta-D-glucopyranoside	M+H	C51H84O22	7.42976	61.5534
5,50_1034,3301m/z	POS	1034.33	5.50388	212861	240361	229194	176789	236521	380938	264456	274076	334708	330464	449650	309676	305228	345907	347137	371267	418862	327618	427651	445253	389729	454272	536417	540487	495196	748863	705007	707579	685106	800696	x		x	(5Z,8Z,11Z,14Z,17Z)-eicosapentaenoyl-CoA	M+H-H2O	C41H64N7O17P3S	3.9548	59.282
6,45_583,4152m/z	POS	583.415	6.4502	1.23515e+06	1.24188e+06	1.49171e+06	880114	1.31131e+06	1.64719e+06	1.24117e+06	1.14428e+06	1.30653e+06	1.40425e+06	1.67597e+06	1.02132e+06	1.40345e+06	575934	842557	1.57115e+06	1.46353e+06	1.42617e+06	1.68022e+06	1.64402e+06	1.51279e+06	1.298e+06	740725	1.02068e+06	1.54505e+06	2.15247e+06	1.55054e+06	1.7919e+06	514090	1.95669e+06	x	x	x	(9'cis,13cis,13'cis)-6,7-Didehydro-5,5',6,6'-tetrahydro-5',6'-epoxy-beta,beta-carotene-3,3',5-triol	M+H-H2O	C40H56O4	1.02896	89.5525
3,55_209,0451m/z	NEG	209.045	3.55028	1.27262e+06	1.45026e+06	1.45368e+06	1.0439e+06	1.12345e+06	1.22584e+06	1.08274e+06	1.14518e+06	851760	1.39375e+06	1.58748e+06	1.12012e+06	1.26817e+06	791950	976740	952015	1.42477e+06	1.14293e+06	1.68266e+06	1.70112e+06	282910	243532	374875	345260	549035	1.78397e+06	1.75117e+06	1.63722e+06	294753	1.75747e+06			x	(E)-p-coumaric acid	M+FA-H	C9H8O3	-2.63428	96.0617
2,76_396,1770m/z	POS	396.177	2.75818	5599.22	8151.93	623.742	8443.54	4069.49	9738.57	2168.99	7936.82	11734.3	5556.9	19379.7	15421.6	33143.4	12502.8	180897	28293.2	33896.6	11901.8	22441.7	20800.5	385299	311048	129714	214831	496386	53830.7	79128.5	86451.5	61500.9	81301.4			x	(S)-(+)-Autumnaline	M+Na	C21H27NO5	-3.21491	88.4224
4,03_282,1518m/z	POS	282.152	4.02538	5967.42	9116.71	4873.24	8229.25	4178.34	7099.85	9845	15216.4	9724.86	12384.4	8142.11	12727.1	12508.5	12468.8	4891.28	29906.4	68595.9	78360.4	159805	137315	8638.91	5068.12	7486.07	10020.4	12682.5	85044.4	103298	104569	102024	75883.6		x	x	(S)-N-Methylcoclaurine	M+H-H2O	C18H21NO3	9.8427	75.8013
3,10_292,0757m/z	POS	292.076	3.09905	8567.32	5516.45	6236.32	7421.2	7934.74	6217.2	7469.81	11854.1	6490.88	14147.2	4312.08	6940.84	15022.9	8555.78	79281.3	10891.9	11899.5	13664.5	4045.63	6096.73	213340	1.3989e+06	19722.4	259049	362797	9661.25	9326.95	10552	6759.26	8226.27			x	(Z)-N-[(2R)-2-Amino-1-hydroxy-3-{[(1E)-N-hydroxy-4-(methylsulfanyl)butanimidoyl]sulfanyl}propylidene]glycine	M+H-H2O	C10H19N3O4S2	-8.73529	88.1318
3,54_322,0927m/z	NEG	322.093	3.53885	350492	480238	317735	395137	358659	401369	335624	410567	485340	426681	429149	646521	1.20781e+06	393859	2.69634e+06	592402	441870	316126	543009	576833	909069	595654	557381	442386	2.15762e+06	219272	134297	100948	208007	133105			x	(Z)-N-[(2R)-2-Amino-1-hydroxy-3-{[(1E)-N-hydroxy-5-(methylsulfanyl)pentanimidoyl]sulfanyl}propylidene]glycine	M-H	C11H21N3O4S2	8.12153	89.8111
3,67_446,0455m/z	NEG	446.045	3.67308	4.85357e+06	2.47145e+06	4.89344e+06	6.55601e+06	4.88172e+06	4.17297e+06	5.89179e+06	7.04616e+06	4.1338e+06	6.75685e+06	2.47235e+06	2.2364e+06	5.17375e+06	5.24193e+06	1.34748e+06	5.29856e+06	4.71874e+06	8.4041e+06	3.07905e+06	5.92118e+06	923683	2.34707e+06	3.92745e+06	2.304e+06	3.06295e+06	5.02432e+06	3.70489e+06	5.17046e+06	4.37954e+06	4.7718e+06	x	x	x	[({(E)-[2-(1H-Indol-3-yl)-1-{[4,5,6-trihydroxy-3-(hydroxymethyl)tetrahydro-2H-pyran-2-yl]sulfanyl}ethylidene]amino}oxy)sulfonyl]oxidanide	M-H	C16H19N2O9S2-	-2.20026	73.5841
3,97_501,1614m/z	POS	501.161	3.96827	1.28941e+06	1.06726e+06	2.00347e+06	2.0802e+06	1.53245e+06	1.30525e+06	1.6162e+06	1.86233e+06	1.71147e+06	1.84845e+06	849995	1.20602e+06	1.01531e+06	836926	804926	1.32497e+06	1.22601e+06	1.37359e+06	923633	1.03736e+06	557187	795935	745033	1.21896e+06	911575	865525	424726	540063	685493	642863	x	x	x	[6-[3,4-dihydroxy-2,5-bis(hydroxymethyl)oxolan-2-yl]oxy-3,4,5-trihydroxyoxan-2-yl]methyl (E)-3-(4-hydroxy-3-methoxyphenyl)prop-2-enoate	M+H-H2O	C22H30O14	2.23635	92.779
3,16_244,1083m/z	POS	244.108	3.15617	33363.8	25623.5	14943.5	27555.3	29210.7	37224.4	16566.6	29505.1	38969	27083	65314.1	65729.4	119567	38376.5	542322	352559	241371	62007.6	223385	187585	782753	596489	148120	689724	1.29196e+06	624704	367598	472409	453226	565388			x	1-(2-Methoxy-4-pyridinyl)-3-phenylurea	M+H	C13H13N3O2	0.816288	94.201
7,62_822,5276m/z	NEG	822.528	7.62228	8.09176e+06	3.37866e+07	5.61178e+07	4.13349e+07	1.45354e+07	2.93287e+07	4.10151e+07	8.47865e+07	1.90471e+07	4.34369e+07	3.36275e+07	1.4258e+07	1.84286e+07	1.66398e+07	2.71189e+07	3.77345e+07	3.27948e+07	5.1103e+06	3.42905e+06	2.3823e+07	1.44776e+07	2.81973e+07	4.13983e+07	3.32856e+07	6.51001e+07	5.132e+07	3.54409e+07	5.38317e+07	2.87937e+07	2.4591e+07	x	x	x	1,2-di-[(9Z,12Z,15Z)-octadecatrienoyl]-sn-glycero-3-phosphocholine	M+FA-H	C44H76NO8P	-1.92471	57.3696
10,32_826,5578m/z	NEG	826.558	10.3187	281731	383181	452156	1.48527e+06	370197	695051	943688	1.96327e+06	137913	614049	2.59573e+06	2.26158e+06	667987	2.37048e+06	184506	380519	677370	387420	190722	170883	314026	138730	236395	380596	719551	710385	667481	1.17458e+06	817836	430334		x		1-[(9Z)-octadecenoyl]-2-[(9Z,12Z,15Z)-octadecatrienoyl]-sn-glycero-3-phosphocholine	M+FA-H	C44H80NO8P	-3.25783	82.0761
6,25_292,2040n	POS	293.211	6.24645	197721	47581.4	203553	247963	404078	139213	197288	74976.2	108247	88691.8	90999.6	58874.8	22050.7	25800.5	27353	32958.5	48781.3	54786.6	27402.2	25836	2104.96	7539.81	17347.9	17686.1	1521.29	4195.28	5349.06	2033.56	6624.25	5594.96	x			12-oxo Phytodienoic Acid	M+H-H2O, M+H, M+Na	C18H28O3	0.491314	89.4471
6,30_564,3303m/z	NEG	564.33	6.30465	1.20286e+06	994581	1.38426e+06	1.4912e+06	1.08179e+06	1.00472e+06	1.15935e+06	1.39763e+06	724829	1.74413e+06	1.1958e+06	973239	890407	1.1586e+06	734554	629035	472963	749154	683734	611593	238489	464251	566774	425594	560002	431436	369015	470253	288577	332109		x		1-Linoleoyl-2-Hydroxy-sn-glycero-3-PC	M+FA-H	C26H50NO7P	-0.710126	88.5588
3,36_404,1493m/z	NEG	404.149	3.35892	210887	774139	204074	476224	138367	110130	661724	316089	211159	197368	61825.9	159263	207912	131660	98332.8	672221	1.65865e+06	1.45351e+06	2.43766e+06	2.4749e+06	108201	140213	24102.5	62512.5	246658	1.31208e+06	1.48982e+06	1.53986e+06	840960	883142		x	x	1-Methyl-8-methylenegibbane-1,4a,10-tricarboxylate	M+FA-H	C20H23O6-3	-0.136777	87.3853
3,16_371,0978m/z	NEG	371.098	3.16375	73928.8	118300	219372	497563	79669	74206	93968.6	114502	144361	101650	349627	200840	266916	117086	198486	85017.8	305699	200392	343650	197798	571803	188792	1.85753e+06	1.90278e+06	697722	150357	113504	288758	51774	189368			x	1-O-(4-coumaroyl)-beta-D-glucose	M+FA-H	C15H18O8	-1.61656	91.1681
3,25_369,1160m/z	POS	369.116	3.24852	707780	608675	545352	957724	764078	1.13509e+06	666599	776322	765855	730541	541077	518860	1.01815e+06	288817	733497	912643	465731	907406	794452	808718	287462	750425	204450	740599	1.12099e+06	471452	262476	508158	446280	475552	x			1-O-[(2E)-3-(4-Hydroxy-3,5-dimethoxyphenyl)-2-propenoyl]hexopyranose	M+H-H2O	C17H22O10	-5.10358	90.2761
3,92_512,2047m/z	POS	512.205	3.91877	13169.8	19311.3	15506.4	9571.79	14940	29410.1	22273.6	27450.9	24489	21484.2	44100.8	29299.9	25424.4	44617.6	39417.1	51467.6	60203.8	32581.6	62680.6	55556.1	71306.6	48432.1	84026.7	73369.1	54672	291570	269658	271920	154519	270724			x	1-O-[(2Z,4E,6Z,8E,10Z,12E,14Z)-15-Carboxylato-2,6,11-trimethyl-2,4,6,8,10,12,14-hexadecaheptaenoyl]hexopyranose	M+Na	C26H33O9-	5.0991	92.7599
3,41_355,1025m/z	NEG	355.103	3.41318	640449	926723	1.34013e+06	1.09709e+06	948125	610564	938112	932446	871515	1.14653e+06	821155	917511	929374	781530	1.37693e+06	527282	704512	778098	927339	630943	2.51616e+06	1.08461e+06	6.40861e+06	4.09634e+06	2.48181e+06	464869	407484	608499	566015	426167			x	1-O-feruloyl-beta-D-glucose	M-H	C16H20O9	-2.56662	88.3453
3,42_385,1134m/z	NEG	385.113	3.42462	1.79074e+06	2.01778e+06	3.59756e+06	3.28141e+06	1.89526e+06	2.29253e+06	2.79143e+06	3.37043e+06	2.27009e+06	2.88061e+06	2.28731e+06	2.25568e+06	3.50194e+06	1.71381e+06	2.9722e+06	2.41262e+06	2.2341e+06	3.51865e+06	4.98539e+06	3.35952e+06	4.69074e+06	3.27669e+06	9.98094e+06	7.95154e+06	6.75192e+06	1.77749e+06	1.92286e+06	3.21881e+06	1.59104e+06	2.49656e+06	x	x	x	1-O-sinapoyl-beta-D-glucose	M-H	C17H22O10	-1.57884	92.1306
7,50_800,5429m/z	NEG	800.543	7.49947	8.62792e+06	5.22814e+06	6.53903e+06	9.026e+06	4.54825e+06	4.93656e+06	9.64655e+06	5.73532e+06	901695	3.12275e+06	9.30437e+06	9.74465e+06	1.27964e+07	8.11883e+06	8.25257e+06	9.55264e+06	5.77888e+06	5.5549e+06	1.13737e+07	3.67877e+06	9.33101e+06	1.36869e+07	5.53055e+06	6.58182e+06	1.92332e+06	3.81173e+06	7.61136e+06	8.86562e+06	5.45355e+06	1.12151e+07	x	x	x	1-palmitoyl-2-[(9Z,12Z,15Z)-octadecatrienoyl]-sn-glycero-3-phosphocholine	M+FA-H	C42H78NO8P	-2.39767	73.6377
3,42_324,0903m/z	POS	324.09	3.42085	176967	124393	156273	170580	127965	183437	159672	226700	158706	178739	82023.2	127814	216820	110551	734931	150705	135898	182690	131223	173713	991512	1.39991e+06	202437	1.16624e+06	1.27185e+06	148251	104914	123046	148294	119188			x	1-S-[(1E)-N-Hydroxy-5-(methylsulfanyl)pentanimidoyl]-1-thio-beta-D-glucopyranose	M+H-H2O	C12H23NO6S2	-9.0016	90.9708
2,90_315,0717m/z	NEG	315.072	2.90382	1.92083e+06	1.52478e+06	1.33159e+06	2.61441e+06	2.37849e+06	1.53828e+06	1.17386e+06	1.34413e+06	1.85847e+06	1.59051e+06	932317	1.01992e+06	2.67652e+06	1.27317e+06	9.02449e+06	1.20855e+06	931015	1.1149e+06	1.09793e+06	978448	9.20182e+06	6.24933e+06	3.21022e+06	7.32963e+06	8.49336e+06	1.3031e+06	952320	1.30301e+06	1.82841e+06	1.08611e+06	x	x	x	2-(beta-D-Glucopyranosyloxy)-5-hydroxybenzoic acid	M-H	C13H16O9	-1.52575	94.3828
3,98_388,1600m/z	POS	388.16	3.97588	165986	136037	142200	114221	179963	175280	218740	164562	144716	93563.5	163800	146350	112607	151184	104000	138215	128340	117318	179872	120946	143632	102543	261863	163074	126026	238075	231474	321391	222382	331644			x	2-(hydroxymethyl)-6-[6-(3-methylbut-2-enylamino)purin-9-yl]tetrahydropyran-3,4,5-triol	M+Na	C16H23N5O5	2.29217	94.6829
9,30_793,5101m/z	NEG	793.51	9.30372	1.94679e+06	626777	3.03594e+06	508767	345203	1.96621e+06	4.44512e+06	3.57317e+06	299774	3.6388e+06	4.52076e+06	4.10509e+06	4.13963e+06	3.97231e+06	3.07289e+06	5.58288e+06	3.81635e+06	4.01554e+06	3.1407e+06	5.19375e+06	3.11122e+06	4.32194e+06	3.15648e+06	2.73621e+06	3.48699e+06	5.9221e+06	3.26944e+06	2.31116e+06	2.47594e+06	3.91404e+06	x			2-[(7E,10E,13E)-7,10,13-Hexadecatrienoyloxy]-3-(hexopyranosyloxy)propyl (9E,12E)-9,12-octadecadienoate	M+FA-H	C43H72O10	-0.943079	92.8779
8,93_746,4964n	NEG	791.495	8.93142	1.72928e+07	1.14787e+07	1.60104e+07	8.89397e+06	8.08568e+06	1.23544e+07	1.7659e+07	1.5393e+07	5.91412e+06	1.81164e+07	1.84365e+07	1.49954e+07	1.84392e+07	1.66635e+07	1.76803e+07	2.25781e+07	1.40025e+07	1.31494e+07	1.59111e+07	1.84383e+07	1.46426e+07	2.09886e+07	1.7664e+07	1.45603e+07	1.59054e+07	1.81156e+07	1.31082e+07	1.41371e+07	1.25452e+07	1.43248e+07	x		x	2-[(7E,10E,13E)-7,10,13-Hexadecatrienoyloxy]-3-(hexopyranosyloxy)propyl (9E,12E,15E)-9,12,15-octadecatrienoate	M-H, M+FA-H	C43H70O10	-0.711114	95.6073
3,39_361,0959m/z	NEG	361.096	3.38557	455.388	2059.83	1042.98	3652.44	2436.93	2272.06	797.536	553.557	3414.99	684.569	689.315	1187.05	1604.57	18.2219	408.757	583.91	2705.36	2331.33	2448.88	33.0584	3199.85	7594.28	1277.05	3883.28	28163	1.69556e+06	617582	2.30859e+06	1.27743e+06	1.17293e+06			x	2-Acetyl-4-(3-acetyl-2,4,6-trihydroxy-5-methylphenyl)-3,5-dihydroxy-4-methyl-2,5-cyclohexadien-1-one	M-H	C18H18O8	8.19874	90.5748
0,55_191,0555m/z	NEG	191.056	0.54825	1.57172e+06	2.25229e+06	2.09661e+06	2.54725e+06	2.43305e+06	1.70241e+06	2.82749e+06	3.14092e+06	2.79915e+06	2.88542e+06	1.4195e+06	1.63094e+06	1.49212e+06	1.15591e+06	1.52972e+06	2.05031e+06	1.41601e+06	1.22627e+06	1.76162e+06	2.11753e+06	544151	1.11666e+06	396688	574022	1.20067e+06	1.08517e+06	570206	887038	1.00813e+06	657297	x			2D-5-O-methyl-2,3,5/4,6-pentahydroxycyclohexanone	M-H	C7H12O6	-2.96127	96.6801
3,54_307,0851m/z	NEG	307.085	3.54267	4.85674e+06	4.72533e+06	3.83781e+06	6.02731e+06	6.29828e+06	4.277e+06	4.29867e+06	4.70299e+06	4.37188e+06	4.82767e+06	2.70684e+06	2.49357e+06	3.8286e+06	2.59663e+06	2.76249e+06	2.80448e+06	3.49178e+06	5.47188e+06	4.17944e+06	5.65791e+06	1.36179e+06	2.45404e+06	1.10577e+06	1.94533e+06	1.91036e+06	2.65291e+06	1.69025e+06	2.29149e+06	2.29507e+06	2.40648e+06	x	x		2-Hydroxy-2-[6-(methylsulfanyl)hexyl]succinate	M+FA-H	C11H18O5S-2	-6.59352	96.2184
3,75_551,1437m/z	NEG	551.144	3.75402	23117.1	18713.5	6859.77	14771.3	9434	118692	2009.07	9784.66	13803.8	9632.67	13663.4	22292.6	60017.4	24079.7	453200	67626.9	78789.9	32233.3	120582	83922	1.58291e+06	4.88588e+06	213041	1.47237e+06	1.54223e+06	387439	316345	577497	694066	402848			x	2-Hydroxy-3-(5-hydroxy-3,6,7-trimethoxy-4-oxo-4H-chromen-2-yl)-6-methoxyphenyl beta-D-glucopyranoside	M-H	C25H28O14	5.55656	84.7832
4,20_339,1079m/z	NEG	339.108	4.19765	71455.8	102777	66494.5	46319.4	63104.2	135425	69953.2	44630.1	44994.9	88231.1	179841	147525	134475	132951	288282	237553	334845	148167	350136	262140	137263	138209	308928	134134	215659	785925	790869	717822	574156	892775			x	2-Methoxy-4-[(1E)-3-oxo-1-propen-1-yl]phenyl hexopyranoside	M-H	C16H20O8	-1.74831	92.8255
3,49_386,1936n	NEG	431.192	3.48935	689043	1.44752e+06	1.35311e+06	1.04819e+06	900657	1.49115e+06	768043	866850	1.02238e+06	1.2064e+06	2.10708e+06	2.36075e+06	1.93685e+06	1.70914e+06	3.6041e+06	2.97346e+06	3.41827e+06	2.03916e+06	4.65987e+06	3.20708e+06	5.94376e+06	4.10673e+06	7.84348e+06	6.28354e+06	5.61613e+06	7.51213e+06	7.5535e+06	8.45971e+06	5.60449e+06	7.16588e+06		x	x	3,4,5,14-Tetramethoxy-18-methyl-13-oxo-18-azoniatetracyclo[7.6.3.0~1,11~.0~2,7~]octadeca-2,4,6,11,14-pentaene	M-H, M+FA-H	C22H28NO5+	-6.67278	93.2791
3,30_632,1406m/z	POS	632.141	3.29803	4575.95	42396	13553.3	13330.9	11371.7	25431.9	15124.1	23036.6	37743.8	48736.6	188540	141792	14725.7	697770	277818	4944.68	5468.33	6638.97	8030.16	2740.38	29014.5	11317.8	533132	56489	9653.96	1985.97	3077.37	4610.1	4752.77	3483.18		x		3-[(2-O-Hexopyranosylhexopyranosyl)oxy]-5-hydroxy-2-(4-hydroxyphenyl)-4-oxo-4H-chromen-7-olate	M+Na	C27H29O16-	8.60317	88.9478
7,22_961,6093m/z	NEG	961.609	7.22338	1.54591e+06	723502	11680.3	603960	98451.6	730721	1.33557e+06	77266	543974	749487	415958	377234	867563	147468	590305	615067	23757.3	27551.5	751487	354713	176.666	202437	505779	18232.8	206322	1.62981e+06	1.35866e+06	1.32227e+06	11838.5	877922			x	3-[(6-O-Hexopyranosylhexopyranosyl)oxy]-2-(palmitoyloxy)propyl (9E,12E)-9,12-octadecadienoate	M+FA-H	C49H88O15	-1.32484	86.0532
9,69_959,5940m/z	NEG	959.594	9.69027	723125	93425.3	970427	328122	57649.2	720190	1.74723e+06	1.40843e+06	71768	1.53405e+06	1.86771e+06	1.47406e+06	1.71525e+06	1.29931e+06	1.55849e+06	2.33743e+06	1.87893e+06	1.62311e+06	865970	1.97851e+06	2.34876e+06	2.68255e+06	2.62606e+06	1.38367e+06	1.74856e+06	1.68346e+06	707058	402156	793256	1.31662e+06	x		x	3-[(6-O-Hexopyranosylhexopyranosyl)oxy]-2-(palmitoyloxy)propyl (9E,12E,15E)-9,12,15-octadecatrienoate	M+FA-H	C49H86O15	-0.920093	87.6618
3,46_266,1029m/z	POS	266.103	3.45893	19972.3	21923.5	15089.1	16555.2	17903.9	24484.5	11580.2	17204.3	18838.7	15826.7	22967.3	11551.5	25769.1	14114.5	25887.3	56488.6	47230.6	32135.6	55047.4	62152	33246.8	19170.9	53375.2	35272.3	35158.8	102477	102028	165136	118534	143928			x	3-[(7,8-Dihydro-3H-purin-6-ylamino)methyl]phenol	M+Na	C12H13N5O	6.95151	93.5851
4,18_191,1430m/z	POS	191.143	4.17867	149682	212242	129437	143209	150943	198049	186222	148482	235141	163548	206365	138540	105345	137910	186910	246571	155126	169007	266473	292956	209898	201557	183494	270803	202177	288965	306141	348006	307065	318335	x	x	x	3-hydroxy-alpha-ionone	M+H-H2O	C13H20O2	-0.149956	92.6233
3,28_337,0922m/z	NEG	337.092	3.27513	824029	1.01469e+06	1.93802e+06	2.25818e+06	1.65328e+06	1.64609e+06	1.15903e+06	1.78159e+06	1.61926e+06	2.02339e+06	1.3952e+06	1.52132e+06	2.08749e+06	3.088e+06	3.29489e+06	1.81797e+06	1.28134e+06	2.08657e+06	918198	1.3351e+06	1.28406e+06	2.22042e+06	4.31389e+06	1.96534e+06	3.30138e+06	1.804e+06	1.03593e+06	1.62749e+06	1.32067e+06	1.32474e+06		x	x	3-p-Coumaroylquinic acid	M-H	C16H18O8	-1.98781	92.5331
2,84_186,1125m/z	POS	186.112	2.83817	336514	205384	178556	373195	268675	345309	274540	528622	277609	413999	254869	179560	230660	319459	142480	353252	392925	723980	483068	408323	66524.9	178951	87361.7	89151.9	185402	232685	370836	253718	212929	236881		x	x	4-(1-Methyl-2-pyrrolidinyl)-3-oxobutanoic acid	M+H	C9H15NO3	0.120243	92.6845
3,51_436,1254m/z	POS	436.125	3.50843	51055.9	81002.9	48894.4	36268.7	41731	44809.5	60579	32273.9	53387.6	25074.8	127405	101275	63932	88144.8	177408	20658	29872.9	19494.4	48437.4	34543.7	231500	223381	258513	186004	204963	72977.2	71122.3	55756.5	51540.5	76878.7		x	x	4-{3-[(6-Ethyl-2,4-diimino-1,2,3,4-tetrahydro-5-pyrimidinyl)oxy]propoxy}-3-(trifluoromethyl)benzenesulfonamide	M+H	C16H20F3N5O4S	-1.55881	94.1637
2,76_226,0715m/z	POS	226.071	2.75818	28065.7	36310.7	44252.5	53839.2	50681.2	56540.9	52442.8	69039.9	41377	41427.1	42934.6	49532.9	48948.5	62081.4	63766.5	107336	82164.6	114850	92415.6	103512	40377.2	39502.9	69303.9	82436.2	87933	169823	116726	166703	172256	145098			x	4-Amino-3-[(1-carboxyvinyl)oxy]-1,5-cyclohexadiene-1-carboxylic acid	M+H	C10H11NO5	2.01249	91.8322
2,83_463,0482m/z	NEG	463.048	2.8305	2.52908e+06	2.03347e+06	3.0404e+06	2.82029e+06	2.55343e+06	1.92717e+06	1.63123e+06	2.34594e+06	1.15332e+06	1.9714e+06	2.02299e+06	1.01172e+06	1.26696e+06	858863	744624	2.79261e+06	2.76606e+06	1.53731e+06	3.0041e+06	2.99539e+06	279090	458971	1.09621e+06	2.2775e+06	1.39757e+06	9.57944e+06	8.72404e+06	1.07584e+07	758635	9.12597e+06	x	x	x	4-Hydroxyglucobrassicin	M-H	C16H20N2O10S2	-0.947924	89.267
7,38_403,0916m/z	NEG	403.092	7.37665	175169	109735	375616	0	0	1.43755e+06	1.31767e+06	977157	0	177181	929993	857418	1.04075e+06	828200	966821	1.03154e+06	739001	665707	143.236	690235	1.27831e+06	1.0596e+06	1.00567e+06	658240	505524	2.07855e+06	718001	254906	845522	652325	x			4'-Phosphopantetheine	M+FA-H	C11H23N2O7PS	-8.27624	84.3403
3,62_401,0754m/z	NEG	401.075	3.62358	214291	201299	158265	258117	216179	207906	148541	227224	166921	210027	154837	124084	232186	153872	454264	194373	212037	220547	295678	375970	1.55181e+06	2.9054e+06	317019	1.27555e+06	1.55498e+06	371833	309095	548816	539501	408745			x	4-PHOSPHOPANTOTHENOYLCYSTEINE	M-H	C12H23N2O9PS	-8.7642	95.9867
3,78_180,1148n	POS	181.122	3.77692	449487	553180	517940	546989	502506	552397	446700	464216	465807	465794	702072	560952	492546	582928	550623	421215	413940	445746	446017	379786	403313	504040	579375	472273	566877	488016	402859	440918	351373	437816		x		5-Pentylresorcinol	M+H-H2O, M+H	C11H16O2	-1.46745	94.5186
4,09_576,1112m/z	NEG	576.111	4.09103	2.80645e+06	1.77587e+06	2.1993e+06	6.21669e+06	3.35159e+06	2.10712e+06	2.46521e+06	2.45806e+06	6.10736e+06	2.32017e+06	400194	1.37768e+06	962586	652108	48666.7	626527	1.00233e+06	4.55167e+06	4.74584e+06	2.27603e+06	1092.39	3038.5	7860.19	3169.13	12642.4	63329.5	20044.1	25820.4	82228.6	10523.7	x	x		6a,12a-Dihydro-6H-[1,3]dioxolo[5,6][1]benzofuro[3,2-c]chromen-3-yl 6-O-(carboxylatoacetyl)hexopyranoside	M+FA-H	C25H23O13-	-2.68463	93.9603
2,73_146,0598m/z	POS	146.06	2.73153	237952	172808	292519	473757	311304	229596	199617	306449	225505	278620	221975	199381	233693	239440	234024	278568	215270	237927	234700	282566	257272	340034	282465	408835	388761	440360	426787	488621	482206	461669	x		x	8-Hydroxyquinoline	M+H	C9H7NO	-1.93714	94.43
2,45_268,1043m/z	POS	268.104	2.4516	1.41498e+06	1.28007e+06	1.0026e+06	1.6446e+06	1.37981e+06	1.2257e+06	1.71465e+06	1.55771e+06	1.6242e+06	1.18557e+06	430649	482293	741681	455076	436080	984235	712821	1.43925e+06	427835	519477	168785	302607	226725	444526	413609	116533	254587	172966	248703	164317	x	x		Adenosine	M+H	C10H13N5O4	1.16927	91.946
4,13_255,1135m/z	NEG	255.114	4.13292	304068	452504	336698	268395	329348	321681	316738	267790	300397	339310	427394	378562	280384	476881	226914	313907	369948	320109	552841	371822	403808	444638	428051	425076	455839	1.61114e+06	1.56938e+06	1.97652e+06	1.39672e+06	1.76461e+06			x	Ancymidol	M-H	C15H16N2O2	-1.47324	94.6578
3,98_429,0792m/z	POS	429.079	3.97588	4235.61	408.233	1064.89	6116.16	3293.75	1609.67	4457.63	4856.69	2131.6	3841.48	260.14	104.242	4874.9	1280.62	35517.2	3470.55	617.999	4289.12	22.8466	1934.1	121290	311720	6347.32	76849.1	129766	18.0621	31.8683	107.33	0.613095	43.9776			x	Baicalin	M+H-H2O	C21H18O11	-5.41139	89.5122
3,92_635,2749m/z	POS	635.275	3.91877	10148.3	15733.4	12133.8	8941.25	14373.8	13102.9	12407.3	9724.77	12951.5	8322.6	20052.9	12709.8	9704.52	15476.3	10072.3	16250.4	22558.9	9913.72	20272.8	19873.5	37955.4	29645.8	19011.4	22912.1	13884.8	117455	107935	122791	165257	98507.7			x	Bis[3,4,5-trihydroxy-6-(hydroxymethyl)tetrahydro-2H-pyran-2-yl] (2E,4E,6E,8E,10E,12E,14E)-2,6,11,15-tetramethyl-2,4,6,8,10,12,14-hexadecaheptaenedioate	M+H-H2O	C32H44O14	7.82052	88.6912
3,08_353,0874m/z	NEG	353.087	3.07615	2.78077e+07	3.04965e+07	3.32596e+07	3.24745e+07	2.98392e+07	2.71874e+07	3.76185e+07	3.60237e+07	3.47597e+07	3.75203e+07	2.45813e+07	2.71228e+07	2.48338e+07	1.74816e+07	2.59054e+07	3.01896e+07	2.98132e+07	4.12857e+07	3.08616e+07	3.40173e+07	1.3057e+07	1.02538e+07	2.3716e+07	2.20303e+07	1.92757e+07	2.71917e+07	1.88616e+07	2.1986e+07	1.84238e+07	1.95718e+07	x	x	x	Chlorogenic acid	M-H	C16H18O9	-1.22798	95.4125
3,11_115,0535m/z	POS	115.053	3.11047	2924.01	3599.78	3274.46	3765.4	5010.85	4155.03	4840.84	3442.56	4392.53	4145.22	1739.71	2108.62	4235.56	5769.53	3952.01	6375.52	6757.7	7370.71	51904.3	10269.5	12978.3	8609.4	34473.8	27657.5	6253.31	121400	80051.2	232775	124402	137863			x	Cinnamaldehyde	M+H-H2O	C9H8O	-5.55348	98.0737
1,05_191,0193m/z	NEG	191.019	1.04622	2.4245e+07	2.7904e+07	2.33463e+07	2.8511e+07	2.65314e+07	2.13003e+07	2.10189e+07	2.16562e+07	2.01988e+07	2.86885e+07	2.39955e+07	1.79733e+07	2.39665e+07	1.87143e+07	2.26012e+07	1.98798e+07	1.60138e+07	1.91954e+07	1.65716e+07	1.86884e+07	2.02757e+07	2.60731e+07	1.33669e+07	1.81585e+07	2.4847e+07	2.00822e+07	1.74811e+07	1.64205e+07	1.26405e+07	1.90506e+07	x	x	x	Citric acid	M-H	C6H8O7	-2.15185	97.1931
1,05_407,0308m/z	POS	407.031	1.0462	544186	537320	445506	545473	554219	537401	460736	494710	453009	580703	625799	474962	659498	476780	698341	481211	400879	530814	353323	414699	1.03736e+06	1.07415e+06	544508	792498	879638	475974	585364	363988	111218	603395		x	x	Cocarboxylase	M+H-H2O	C12H18N4O7P2S	-7.24968	89.7574
3,79_223,0610m/z	NEG	223.061	3.78828	1.80671e+07	2.15741e+07	2.02844e+07	1.96358e+07	1.66716e+07	1.6063e+07	2.04248e+07	1.96546e+07	1.71698e+07	2.29029e+07	2.28048e+07	1.87174e+07	1.91291e+07	1.56613e+07	2.06058e+07	2.19266e+07	2.07883e+07	2.01502e+07	2.69087e+07	2.99785e+07	1.19248e+07	1.28947e+07	1.63095e+07	1.43269e+07	1.98597e+07	2.77287e+07	2.45257e+07	2.77864e+07	1.54796e+07	2.55888e+07	x	x	x	coniferyl aldehyde	M+FA-H	C10H10O3	-1.25566	98.7645
0,79_183,0049m/z	POS	183.005	0.785317	177481	222991	180666	194096	196836	167554	158996	161315	142695	197143	258983	184763	187968	203314	140719	89524.4	94713.1	126337	93735.7	81918.7	92778.6	140103	114417	104330	118258	67510.8	82975.7	54878.9	47989.8	83489.2		x		D-Erythrose 4-phosphate	M+H-H2O	C4H9O7P	-1.86917	94.3451
3,19_381,2134m/z	POS	381.213	3.18663	199379	104353	96066.1	192349	205870	124433	164350	241960	138162	170982	211442	106074	302813	221306	202547	104324	126293	148286	92602.2	127562	66486.1	172557	174299	61160.6	207848	64791.6	71392.7	94510	59607.1	72011		x		desacetoxyvindoline	M+H-H2O	C23H30N2O4	-9.79817	85.7672
1,05_192,0273n	POS	215.017	1.05382	211594	231872	183466	297748	225317	208256	182581	236434	131189	246062	274304	235029	279180	251230	246961	179046	147870	159104	123355	176775	274950	296977	210566	255090	190458	142408	189937	120392	40480.5	188804	x	x	x	D-glucaro-1,5-lactone	M+H-H2O, M+H, M+Na	C6H8O7	1.71882	93.2663
0,53_195,0506m/z	NEG	195.051	0.533017	405035	338711	377985	535778	392112	324874	318827	454442	418064	429622	273290	277809	405355	222881	468352	757043	846198	671384	1.15971e+06	1.30874e+06	606496	1.05895e+06	219445	570736	829058	1.31708e+06	876358	1.38538e+06	1.13144e+06	1.10628e+06		x		D-Gluconic acid	M-H	C6H12O7	-2.25261	95.7765
3,35_246,0047n	NEG	244.997	3.3513	143450	265901	387101	5039.65	11936.1	893794	1.04215e+06	695987	574.686	147800	880566	1.04661e+06	992956	1.48504e+06	1.17187e+06	832176	490792	361798	6132.46	370300	835246	363556	1.31097e+06	645567	484985	1.26535e+06	537840	298290	602730	450327	x	x		Dimethylallylpyrophosphate	M-H, M+FA-H	C5H12O7P2	-4.44169	91.524
0,58_130,0496m/z	POS	130.05	0.582517	198128	252441	250852	306896	326233	296769	272040	351229	267786	313474	279520	201892	198095	317058	155133	128053	134573	200231	133799	142001	103122	101881	165655	123985	143720	65816.6	66450.2	69642	60953.7	83842		x		DL-Glutamic acid	M+H-H2O	C5H9NO4	-1.66457	94.1293
3,05_202,1076m/z	POS	202.108	3.04858	265345	77107.3	82066.3	251602	154953	153122	52682.4	138428	139484	112968	90605.4	65643.1	131443	70795.8	52186.9	149784	151370	306697	235949	273389	69184.2	158867	37877.7	79264.1	145025	78458.2	201561	180642	114431	126355		x		D-PANTOTHENIC ACID	M+H-H2O	C9H17NO5	0.927703	93.1565
0,85_256,0818m/z	POS	256.082	0.84625	645796	474911	558744	710343	582718	539601	691845	663779	476729	434693	752520	604774	527600	650533	362720	347372	311731	413652	326322	384030	420432	451753	835847	497719	421491	388843	395394	458033	305276	488442		x		D-ribosylnicotinate	M+H	C11H13NO6	0.896408	92.3685
3,80_193,0503m/z	NEG	193.05	3.7959	5.68352e+06	6.97392e+06	7.48585e+06	6.75618e+06	6.12688e+06	5.08604e+06	6.30264e+06	5.92748e+06	5.39674e+06	8.49127e+06	5.51063e+06	6.18895e+06	5.12206e+06	6.45882e+06	6.86624e+06	5.37388e+06	5.89682e+06	3.93413e+06	6.56741e+06	5.42639e+06	3.68295e+06	2.82579e+06	6.76299e+06	3.85428e+06	4.95267e+06	5.79285e+06	4.69336e+06	4.2486e+06	4.13412e+06	4.7461e+06	x	x	x	Ferulic Acid	M-H	C10H10O4	-1.96335	96.3493
4,70_481,1382m/z	NEG	481.138	4.70317	134963	28828.2	14752.5	7108.04	8993.88	783772	1866.9	8957.83	17031	11112.4	379326	955108	1.17884e+06	916822	4.95754e+06	1.46883e+06	1.62219e+06	1.06969e+06	1.86811e+06	1.54919e+06	3.04171e+07	4.4145e+07	4.71014e+06	1.85232e+07	1.86786e+07	4.10965e+06	4.34672e+06	4.66239e+06	7.15398e+06	4.79744e+06			x	gamma-Glutamyl-S-(1H-indol-3-ylmethyl)cysteinylglycine	M+FA-H	C19H24N4O6S	-3.91418	93.2091
3,31_217,1547m/z	POS	217.155	3.30565	621722	311362	554589	868032	775393	406341	985335	1.08304e+06	822953	753260	239089	137419	321132	383463	124305	960696	648962	1.69433e+06	630287	811715	77104.2	328901	225184	91159.5	224507	540343	564543	558106	672957	648443	x	x	x	Geranylacetone	M+Na	C13H22O	-7.94764	93.4044
1,01_307,0837n	POS	308.091	1.00715	7.08503e+06	6.47628e+06	6.45686e+06	7.78354e+06	7.61868e+06	8.04675e+06	7.3001e+06	6.92973e+06	7.73177e+06	7.30607e+06	7.80296e+06	5.57556e+06	4.88174e+06	4.86518e+06	8.17706e+06	4.50251e+06	3.59689e+06	3.77403e+06	2.23677e+06	2.31767e+06	4.20092e+06	5.19029e+06	5.05074e+06	5.19715e+06	5.54251e+06	2.89526e+06	2.19448e+06	3.11387e+06	2.01219e+06	3.16371e+06	x	x	x	Glutathione	M+H-H2O, M+H	C10H17N3O6S	-0.289155	94.244
1,76_613,1615m/z	POS	613.162	1.7584	66113.1	63746.8	85160.9	184029	97569.3	66266.4	164889	150236	121423	120651	17492.8	66738.1	253614	48344.2	45723.2	182487	382191	672977	416703	479976	32093.4	59913.5	881.63	17908.1	209617	159806	147739	85646.8	100735	88533.5		x		Glutathione (oxidized)	M+H	C20H32N6O12S2	3.75139	80.0355
7,21_487,3426m/z	POS	487.343	7.20805	234048	195591	201204	147317	151175	83562.2	125805	107938	158858	94377.3	181946	250148	227077	198647	220590	105026	156908	146300	116391	129404	196759	152641	126664	155786	132989	40015.6	73821.6	36365.7	87999.9	45632.3	x	x	x	gypsogenic acid	M+H	C30H46O5	1.55115	88.133
5,54_159,0680n	POS	160.075	5.54197	1.13274e+06	343274	930598	1.89042e+06	1.4547e+06	1.24418e+06	1.91631e+06	2.35885e+06	1.45841e+06	1.36844e+06	516199	773780	2.28288e+06	1.97396e+06	186291	1.95041e+06	2.22781e+06	5.48833e+06	1.41741e+06	3.01306e+06	246953	203282	1.20652e+06	931770	765783	630813	921771	867730	1.34399e+06	726349	x	x	x	Indole-3-acetaldehyde	M+H-H2O, M+H	C10H9NO	-2.67389	98.0936
3,70_130,0643m/z	POS	130.064	3.696	2.18197e+06	953672	2.11053e+06	3.04331e+06	2.21296e+06	2.47018e+06	2.84335e+06	3.74855e+06	2.16234e+06	2.68258e+06	1.29451e+06	1.03942e+06	2.55412e+06	2.564e+06	651404	3.02628e+06	2.25833e+06	4.87985e+06	1.28065e+06	2.75095e+06	407135	887604	2.08068e+06	1.06242e+06	1.28929e+06	2.13818e+06	1.60577e+06	2.4895e+06	2.4281e+06	2.46805e+06	x	x	x	Indole-3-carbidol	M+H-H2O	C9H9NO	-5.92643	97.2981
3,11_146,0598m/z	POS	146.06	3.11047	98593.2	106375	111094	130932	122088	140214	131871	154944	124059	120815	145530	126794	313963	154673	366739	216785	200011	197386	576059	268634	526337	945887	562974	771260	872701	1.21644e+06	858833	2.07422e+06	1.24505e+06	1.42773e+06			x	Indole-3-carboxaldehyde	M+H	C9H7NO	-1.56989	98.1451
2,78_120,0798m/z	POS	120.08	2.77723	1.6687e+06	2.02461e+06	1.95738e+06	2.36381e+06	2.1028e+06	2.3737e+06	2.3761e+06	2.31772e+06	2.85827e+06	2.19767e+06	2.50855e+06	1.97384e+06	2.90169e+06	2.29901e+06	3.96766e+06	1.81978e+06	1.77077e+06	2.08593e+06	3.11034e+06	1.84402e+06	1.76152e+06	2.21293e+06	3.76483e+06	2.54326e+06	3.06268e+06	2.87841e+06	2.32916e+06	3.76081e+06	2.40911e+06	3.07802e+06	x	x	x	Indoline	M+H	C8H9N	-8.01385	97.4586
3,23_207,0596m/z	POS	207.06	3.2333	4.26712e+06	3.06689e+06	4.06331e+06	5.56901e+06	4.1383e+06	4.58676e+06	3.7801e+06	4.18082e+06	4.34673e+06	3.60304e+06	2.76942e+06	2.61413e+06	2.38473e+06	2.10981e+06	1.20953e+06	2.87787e+06	2.33137e+06	3.8891e+06	3.31897e+06	3.22621e+06	551248	794024	1.02944e+06	1.16618e+06	1.32562e+06	2.21822e+06	1.38525e+06	1.7973e+06	2.01163e+06	1.92013e+06	x	x	x	indolylmethylthiohydroximate	M+H	C10H10N2OS	4.52499	96.2112
0,56_191,0193m/z	NEG	191.019	0.55585	6.39977e+06	6.50523e+06	5.39403e+06	7.73911e+06	6.2061e+06	4.98823e+06	5.45503e+06	5.56604e+06	4.73443e+06	6.88582e+06	5.63493e+06	4.14511e+06	4.62926e+06	4.47144e+06	5.22008e+06	4.81552e+06	3.94441e+06	4.16076e+06	4.16347e+06	4.53242e+06	4.67979e+06	6.23686e+06	3.60944e+06	4.14154e+06	5.29719e+06	5.53029e+06	5.05782e+06	4.48159e+06	3.71913e+06	5.53333e+06	x			isocitric acid	M-H	C6H8O7	-2.22601	97.5407
0,77_287,0525m/z	POS	287.053	0.773883	334225	333872	300816	355194	320335	365645	271268	304311	349969	353406	370764	321873	386229	332227	380310	240003	209024	266105	224532	195968	361355	375762	409198	427481	373722	183179	197320	159079	142800	216566		x	x	Kaempferol	M+H	C15H10O6	-8.74545	87.6792
3,26_190,0502m/z	POS	190.05	3.25615	243385	270604	270433	303199	303029	308885	246041	277477	286186	234272	425511	427580	286132	332525	283677	234194	242845	223392	303857	274109	290356	380439	584295	536024	399144	425769	410629	496342	439466	489423		x		Kynurenic acid	M+H	C10H7NO3	1.58378	96.6686
2,78_166,0857m/z	POS	166.086	2.77723	532695	601486	642401	668455	617511	755913	710117	675236	826354	651970	785698	617049	876319	710836	1.11908e+06	573514	523039	585816	856523	519634	610757	671800	1.12702e+06	719708	899562	862514	664621	1.07581e+06	695804	944313	x	x		L-(-)-Phenylalanine	M+H	C9H11NO2	-3.11161	94.6319
0,53_258,1102m/z	POS	258.11	0.533017	578627	586752	471932	509536	556405	939224	671568	750815	816293	783662	898130	814885	837960	445180	1.09483e+06	1.31565e+06	1.72876e+06	1.1049e+06	1.44941e+06	1.56197e+06	945340	1.61074e+06	2.19557e+06	2.36395e+06	1.67732e+06	2.20576e+06	1.43621e+06	3.20724e+06	2.10253e+06	2.04857e+06	x	x	x	L-alpha-Glycerylphosphorylcholine	M+H	C8H20NO6P	0.404782	97.5892
1,00_179,0487m/z	POS	179.049	0.999533	242827	235106	214073	282725	281339	278501	246151	245906	298707	270361	254415	178383	156465	164569	287769	133522	106133	132646	65468.2	73968.7	118068	178282	151352	173359	190890	78909	64078.7	86346.8	53283.7	87762.5		x	x	L-Cysteinylglycine	M+H	C5H10N2O3S	1.19746	90.0991
1,59_265,0857m/z	POS	265.086	1.58607	24714.6	23426.8	33384.8	50311.1	23093.3	50506.6	43673.5	70877.9	53858.2	45903.9	80118.3	68059.5	54770	60947.8	65501.4	176165	169604	203688	246470	156991	61226.6	45037.9	53172.4	75204.9	31782.8	91070.5	187431	124776	83526.5	239391		x		L-gamma-Glutamyl-N-methyl-D-cysteine	M+H	C9H16N2O5S	1.72602	86.8647
1,15_164,0740m/z	POS	164.074	1.14902	19723.6	25158.2	20575.3	12079.9	21327.2	22228.2	19418.7	29250.6	31343.5	32803.6	36095.9	23238.4	49529.5	17238.1	111516	141044	173679	116394	185929	166860	82124.6	195466	87252.2	110608	171521	387253	329619	508077	399295	427302		x	x	L-homomethionine	M+H	C6H13NO2S	0.354341	89.4591
3,04_471,1984m/z	POS	471.198	3.04097	16160	11692.8	8666.92	4907.59	6915.22	9867.87	9012.12	10165.1	10477.6	12650.1	18994.7	11983.2	16927.1	17893.3	58132.2	59749.5	73074	42883.5	56614.3	30918.9	147267	100034	71878	109931	95333	270255	217116	281641	232209	253251			x	Limonin	M+H	C26H30O8	-6.17769	91.8404
3,11_205,0972m/z	POS	205.097	3.11427	22883	28571.8	26716.2	29277.2	30086.6	32342.6	39220.5	37788.3	28002	32468.3	34486.1	24220.2	40743.2	36818.9	46005.1	39807.7	29273.7	31245.9	192081	27170	80301.1	45408.1	200885	132981	48658.2	357141	241944	366088	303007	414733			x	L-Tryptophan	M+H	C11H12N2O2	0.333882	93.574
6,66_495,3332n	POS	496.34	6.66442	1.29861e+06	1.23032e+06	1.36569e+06	1.35745e+06	1.22259e+06	1.5353e+06	1.30922e+06	1.41773e+06	1.0735e+06	1.42674e+06	1.36066e+06	1.2026e+06	1.03785e+06	1.05265e+06	936967	1.32355e+06	885272	1.13354e+06	1.03218e+06	944513	944390	1.02839e+06	1.13448e+06	961420	1.50759e+06	1.00187e+06	911716	754811	857857	1.00221e+06			x	LysoPhosphatidylcholine_16_0	M+H-H2O, M+H	C24H50NO7P	1.33381	95.2668
0,77_133,0137m/z	NEG	133.014	0.7739	1.07131e+06	1.31861e+06	991198	1.4133e+06	1.31035e+06	1.02982e+06	887965	985931	1.21898e+06	1.26886e+06	944084	822530	783155	733417	560289	980834	1.07047e+06	917030	1.4335e+06	1.28028e+06	324703	765498	297904	453181	579935	1.76703e+06	1.613e+06	1.65431e+06	1.53105e+06	1.79993e+06		x	x	Malic acid	M-H	C4H6O5	-4.20582	96.5514
3,31_200,1282m/z	POS	200.128	3.30565	199564	84934.3	161565	289104	262309	111236	329272	365627	295044	243475	57183.3	33227.7	84781.3	108284	34628.9	323233	219618	694399	218194	300611	18348.3	101471	56079.4	24434	68307.4	163358	199758	194955	245880	203043		x	x	methyl 3-hydroxy-8-methyl-8-azabicyclo[3.2.1]octane-4-carboxylate	M+H	C10H17NO3	0.2208	93.5501
3,50_224,1413n	POS	207.138	3.50463	45886.5	99382.8	81574.1	50031	60936.8	90644.4	54534.4	60296.7	83069.1	69739.7	237949	180859	144881	151007	237813	221055	285627	125747	364608	213355	399381	208446	782704	457116	302723	679442	617637	750083	599796	872401			x	Methyl Jasmonate	M+H-H2O, M+H	C13H20O3	0.0717493	94.0952
4,90_251,0307m/z	POS	251.031	4.90218	1815.38	67.1486	756.585	2713.94	6784.91	521.478	2969.91	12744.1	2827.69	7705.84	0	169.63	26728	1164.12	300838	414.056	148.981	5560.06	87.1564	1871.22	253618	2.22846e+06	16281.2	447188	1.04095e+06	526.853	0	248.59	0	466.802			x	Mevalonic acid-5P	M+Na	C6H13O7P	7.17068	91.6239
4,09_341,1506m/z	POS	341.151	4.09488	108360	103748	99089.7	99530.1	125672	139293	120052	110510	124696	97744.4	122258	114932	113709	99657.1	106492	207368	238445	169185	281152	251065	203862	182651	124771	176626	149058	652441	556806	838103	261103	647105		x	x	MLS001140572-01!1-[2-(4-ethyl-2-oxochromen-7-yl)oxyacetyl]piperidine-4-carboxamide	M+H-H2O	C19H22N2O5	2.9669	92.8477
4,40_485,1330m/z	NEG	485.133	4.39662	20136.5	15900.3	5065.81	21334	13806.5	18575.4	5515.73	7194.7	16486.9	8039.16	8797.84	12913.1	17371.1	10564.4	207311	27179	21667	18697.3	17711.6	24201.8	947964	1.44199e+06	49093.2	821165	689929	42178.2	26171	26720.5	108331	26375			x	N-[(4S)-4-Ammonio-4-carboxylatobutanoyl]-S-[(1Z)-N-hydroxy-2-phenylethanimidoyl]-L-cysteinylglycine	M+FA-H	C18H24N4O7S	-4.05036	86.459
3,81_501,1607m/z	NEG	501.161	3.81113	48467.3	28181.6	35054.3	48175	39418.2	49184.1	25456	23180.7	48512.7	28745.9	43010.9	38856	47946	30071.9	87077.8	232785	346314	106127	404133	294951	122508	150757	128412	135502	171395	1.21101e+06	824826	1.52929e+06	658680	875909			x	N-[4-(3-Amino-1-oxo-1,2,5,6,6a,7-hexahydroimidazo[1,5-f]pteridin-8-ium-8-yl)benzoyl]glutamic acid	M+FA-H	C20H22N7O6+	-0.26755	87.9522
3,81_654,2419m/z	POS	654.242	3.80738	15526.1	14152.5	17880	11816.6	12966	19112.6	10903.3	11794.4	18782.2	13231.2	23012.7	15128.5	10333.7	10861.3	19727.6	46169.2	39151.6	30883.1	51678.1	34349.5	29885.4	25959.7	24509.4	17055.1	22294.1	134501	150191	133279	119298	159424			x	N1,N5,N10-Tricaffeoyl spermidine	M+Na	C34H37N3O9	-0.418496	87.8873
3,67_477,0639m/z	NEG	477.064	3.67308	1.20393e+08	7.15313e+07	1.26313e+08	1.52285e+08	1.17955e+08	1.02744e+08	1.42814e+08	1.64998e+08	9.85376e+07	1.64848e+08	7.53221e+07	6.77639e+07	1.31611e+08	1.32896e+08	4.40728e+07	1.29987e+08	1.142e+08	1.82692e+08	8.75021e+07	1.45394e+08	2.92954e+07	6.78802e+07	1.05625e+08	6.55092e+07	8.60016e+07	1.30423e+08	9.63662e+07	1.23118e+08	1.05627e+08	1.19603e+08	x	x	x	neoglucobrassicin	M-H	C17H22N2O10S2	-0.786614	98.8672
0,91_130,0856m/z	POS	130.086	0.90815	119905	123661	120807	118479	105539	149339	196786	192739	160696	212567	92444.8	78512.5	770696	61584.1	2.832e+06	306077	273922	316349	301045	359152	1.26333e+06	5.18007e+06	378259	1.99396e+06	4.01741e+06	557483	381473	574745	468973	554154	x	x	x	N-Hydroxy-L-isoleucine	M+H-H2O	C6H13NO3	-4.73436	95.8647
0,55_124,0385m/z	POS	124.038	0.55205	689518	684484	718533	803888	666391	691410	788775	712555	560690	522546	1.27761e+06	976798	762759	957036	724332	412523	433803	448214	420741	488283	529438	650124	1.42339e+06	793437	635178	495653	455556	610792	473624	646084	x	x	x	Niacin	M+H	C6H5NO2	-6.71685	96.2977
3,11_187,0632n	POS	188.07	3.11047	310220	412908	397837	446802	434032	441711	587625	574809	421640	425962	490527	339780	602208	532893	583923	527024	455063	503049	3.31872e+06	393805	1.0267e+06	703316	2.98247e+06	2.13446e+06	622904	7.35006e+06	4.79305e+06	1.15519e+07	6.9597e+06	8.46744e+06		x	x	NL3680000	M+H-H2O, M+H	C11H9NO2	-0.84214	98.9615
1,70_611,1444m/z	NEG	611.144	1.69652	632999	694482	657972	1.60996e+06	829478	566774	752128	787235	1.01196e+06	821392	252927	467366	1.01627e+06	419426	293351	815565	1.12743e+06	1.86639e+06	1.55914e+06	1.51687e+06	172463	272169	39415.9	122214	654203	711645	522994	377375	480390	355748		x		Oxidized glutathione	M-H	C20H32N6O12S2	-0.44991	81.9776
10,36_757,5640n	POS	780.553	10.3644	451289	2.89831e+06	4.27315e+06	3.2316e+06	4.38929e+06	3.99597e+06	6.77502e+06	6.77778e+06	4.49406e+06	3.92194e+06	6.9967e+06	4.13364e+06	5.54167e+06	3.59445e+06	3.41449e+06	4.19776e+06	4.9203e+06	2.01894e+06	4.03171e+06	6.50378e+06	3.51164e+06	1.05949e+06	7.63475e+06	4.69091e+06	7.01125e+06	4.09293e+06	5.14134e+06	6.74419e+06	5.23909e+06	6.2993e+06	x	x	x	PC	M+H, M+Na	C42H80NO8P	2.44329	89.9048
7,11_780,5520m/z	POS	780.552	7.10523	1.53756e+07	1.89659e+07	2.54544e+07	2.17457e+07	1.65496e+07	2.49913e+07	1.85763e+07	2.64075e+07	1.59381e+07	2.27269e+07	2.73337e+07	1.84597e+07	1.76965e+07	1.87899e+07	2.18069e+07	2.71059e+07	1.46055e+07	1.74881e+07	1.75792e+07	2.6777e+07	1.89002e+07	3.69946e+06	3.02443e+07	2.20351e+07	2.62268e+07	2.31578e+07	2.83824e+07	2.37237e+07	1.71617e+07	2.23065e+07	x	x	x	PC(18:2(9Z,12Z)/18:3(9Z,12Z,15Z))	M+H	C44H78NO8P	-2.25162	86.9714
2,78_120,0566n	POS	103.053	2.77723	164215	195128	179583	248956	215200	230316	233638	227445	322961	217679	221724	185966	294421	218200	437633	168996	169408	219520	339270	184745	163895	233595	382098	252943	324982	293873	248261	417154	243298	308945	x			Phenylacetaldehyde	M+H-H2O, M+H	C8H8O	-7.90695	95.916
3,11_118,0642m/z	POS	118.064	3.11047	33090.7	38299.2	41111.6	47432.8	40185.4	44239.9	45570.8	52385.5	46398.6	42151.8	39761.5	32624.5	46761.3	42177	47070.5	40893	40242.4	51805.6	264253	37087.8	68071.5	53383	196737	149063	52340.1	612821	400347	1.12669e+06	615000	703639			x	PHENYLACETAMIDE	M+H-H2O	C8H9NO	-7.1073	95.7617
4,13_585,2720m/z	POS	585.272	4.12915	97331.6	117552	80059.5	78570.4	92544	115909	140184	108902	87723.9	91999.6	104747	87819.8	64663.9	101210	73108.9	100340	78195.5	52317.4	105799	79792.6	128423	95191.8	86049.7	73846	77530.2	381922	420145	282670	214818	628346			x	Phytochromobilin	M+H	C33H36N4O6	2.15686	93.479
5,58_317,2929n	POS	318.3	5.57623	960892	594308	871049	1.39891e+06	1.04853e+06	842307	894407	926638	580991	896941	623176	446307	1.13305e+06	520203	914020	494036	353294	676905	154975	410558	157746	339288	310722	202027	570026	82146.6	60006.4	98828.1	100984	87521.2	x	x	x	Phytosphingosine	M+H-H2O, M+H	C18H39NO3	-0.185064	93.568
4,43_398,2695m/z	POS	398.269	4.42808	1051.54	1006.15	1257.02	832.323	1001.29	3844.15	820.018	1826.81	6528.36	2347.33	562.65	860.59	451.408	1078.42	869.806	126323	108239	89961	168050	130273	1528.32	3385.68	81.1714	739.149	767.213	242698	163827	276168	668382	214715		x	x	Piericidin A1	M+H-H2O	C25H37NO4	1.2895	87.9761
1,47_86,0958m/z	POS	86.0958	1.47465	40609.4	50284.1	42387.8	62863.6	62351.6	63098.7	74333.9	84458	88824.6	70011	51511.1	33623.7	49208.8	53670.8	49170.3	80168.9	86056.1	117149	238809	104609	36688	50183.8	85885	58245.6	64260.1	169775	153997	186701	146519	204433			x	PIPERIDINE	M+H	C5H11N	-6.79257	95.8429
2,98_170,0811m/z	POS	170.081	2.98383	1930.99	2354.06	1400.97	339.911	2882	5323.46	3524.77	2908.3	9839.13	2961.19	1407.19	1399.99	1795.97	1328.05	893.885	151958	162391	106133	189233	141952	1921.09	9762.6	1346.79	4197.29	3071.57	300659	237977	375934	790551	239200		x	x	Pyridoxine	M+H	C8H11NO3	-0.145257	93.967
3,28_191,0556m/z	NEG	191.056	3.27895	1.53944e+06	1.66419e+06	1.72844e+06	2.1002e+06	1.73509e+06	1.52377e+06	2.02217e+06	1.8791e+06	2.2819e+06	2.11938e+06	1.13606e+06	1.24282e+06	1.27752e+06	1.03209e+06	1.62395e+06	1.42307e+06	1.3052e+06	2.06294e+06	1.81191e+06	1.94681e+06	787330	721595	1.68957e+06	1.29724e+06	1.37239e+06	1.35313e+06	1.1742e+06	1.4315e+06	1.13496e+06	1.1041e+06		x		Quinic acid	M-H	C7H12O6	-2.43519	56.3729
3,29_318,1560m/z	POS	318.156	3.29042	362127	6542.52	6204.57	73391.7	31438.7	8846.99	190515	38220	6576.47	10012.7	512385	6214.88	412469	6341.71	235528	9450.61	78915.7	12281.3	106962	155602	129365	37614	13828.2	44273	25193.7	78176.7	50728.2	89157.6	51648.4	54886.5		x		riboprine	M+H-H2O	C15H21N5O4	-0.336529	84.2974
3,11_132,0801m/z	POS	132.08	3.11047	4210.48	6168.42	5551.33	7664.82	5598.6	4472.24	8483.09	8945.5	5899.3	6828.9	6681.39	4780.13	6104.68	8677.81	5931.15	6231.59	6937.21	9212.85	48295.8	6334.04	13497.4	10639	37270.2	28326.7	9124.88	123633	80002.2	220976	121138	140460			x	S-(-)-Cathinone	M+H-H2O	C9H11NO	-4.59856	94.2913
3,87_175,0387m/z	POS	175.039	3.87212	365217	433844	346488	388515	351886	461864	386133	420896	406957	373182	597036	408603	435048	389202	442035	490764	394520	394234	497594	523102	290578	311028	386313	373335	436025	629864	500252	584936	536673	563273			x	Scopoletin	M+H-H2O	C10H8O4	-1.23753	94.1703
3,79_339,0718m/z	NEG	339.072	3.78828	3.03808e+06	3.48988e+06	3.31157e+06	2.78109e+06	2.64452e+06	2.75208e+06	3.32394e+06	3.23131e+06	2.41227e+06	3.58411e+06	4.18076e+06	3.21907e+06	3.51933e+06	2.81414e+06	3.56744e+06	3.20839e+06	3.18499e+06	3.21073e+06	3.819e+06	4.15289e+06	2.24371e+06	2.17943e+06	2.78503e+06	2.30089e+06	2.99117e+06	4.76766e+06	3.57762e+06	3.5443e+06	2.36063e+06	3.92148e+06			x	Sinapoyl malate	M-H	C15H16O9	-1.13203	93.555
7,47_679,4057m/z	NEG	679.406	7.469	3.0311e+06	3.9564e+06	2.96565e+06	1.46385e+06	1.5069e+06	939309	3.0905e+06	2.21842e+06	900003	1.75129e+06	1.98759e+06	3.10366e+06	3.1272e+06	2.7104e+06	2.42153e+06	1.73753e+06	2.91059e+06	3.41929e+06	2.84124e+06	4.43095e+06	2.15326e+06	2.04808e+06	1.50976e+06	1.78174e+06	2.96186e+06	1.53144e+06	1.86526e+06	1.35242e+06	825732	1.3589e+06	x	x		soyasapogenol B 3-O-beta-glucuronide	M+FA-H	C36H58O9	-0.876651	91.6939
0,65_96,9596m/z	NEG	96.9596	0.651067	5.47177e+06	7.44007e+06	7.63192e+06	5.9576e+06	6.49221e+06	5.51953e+06	5.99695e+06	6.84188e+06	4.82532e+06	8.03918e+06	8.65663e+06	7.88672e+06	9.78632e+06	7.25628e+06	9.04902e+06	6.56701e+06	6.90118e+06	7.39496e+06	6.97386e+06	8.49571e+06	5.92073e+06	6.44762e+06	6.37754e+06	6.50948e+06	8.96507e+06	7.63611e+06	4.75558e+06	6.95437e+06	4.87585e+06	5.63857e+06	x	x	x	Sulfuric acid	M-H	H2O4S	-5.11934	94.2517
3,27_164,0469n	POS	147.044	3.27137	590210	607795	1.09885e+06	1.11067e+06	985259	1.32661e+06	802123	1.12625e+06	941227	1.01593e+06	790556	763557	929537	1.39541e+06	747823	890222	631255	1.32338e+06	555007	688948	237795	429770	1.17854e+06	577865	824205	589915	379729	646643	638801	599949	x	x		trans-4-Coumaric acid	M+H-H2O, M+H	C9H8O3	-2.51583	95.5768
3,09_180,0420n	POS	163.039	3.08762	3.20914e+06	2.9972e+06	3.37773e+06	3.97144e+06	3.17618e+06	4.1212e+06	4.2901e+06	4.41924e+06	4.26315e+06	3.69333e+06	3.07334e+06	3.34358e+06	3.0869e+06	2.15288e+06	2.89953e+06	3.48921e+06	3.34197e+06	5.30114e+06	2.89448e+06	3.88544e+06	1.51487e+06	1.48989e+06	3.20313e+06	3.24672e+06	2.77177e+06	2.29984e+06	1.79011e+06	1.9397e+06	2.27527e+06	1.95373e+06	x	x	x	trans-caffeic acid	M+H-H2O, M+H	C9H8O4	-1.55006	95.2223
1,06_169,0356m/z	POS	169.036	1.06143	372184	209697	236039	456236	377691	435541	513606	634787	450157	374909	146116	156813	120001	274084	50216	465833	437805	651779	518482	442441	17746.2	26940.8	52161.6	28516.4	31643.9	104812	122863	55440	104304	139848	x	x		Uric Acid	M+H	C5H4N4O3	0.031676	95.0401
0,74_565,0473m/z	NEG	565.047	0.7358	2.00597e+06	1.82432e+06	2.7518e+06	2.71727e+06	1.86437e+06	1.61282e+06	2.69638e+06	3.11157e+06	1.37875e+06	2.53166e+06	2.10782e+06	1.68042e+06	2.25906e+06	1.8686e+06	2.54408e+06	1.21769e+06	1.04045e+06	1.19214e+06	1.05481e+06	1.3191e+06	1.11113e+06	1.12181e+06	1.1597e+06	823766	1.72655e+06	1.02863e+06	608612	993774	514716	675566	x	x		Uridine 5'-diphospho-D-glucose	M-H	C15H24N2O17P2	-0.80377	87.4574
