# Supplementary figures and images for: Transcriptomic, Metabolomic and Ionomic Analyses Reveal Early Modulation of Leaf Mineral Content in Brassica napus under Mild or Severe Drought
Source: MDPI journal article supplement (doi:10.3390/ijms23020781), 2022-01-11

REVIGO TreeMap

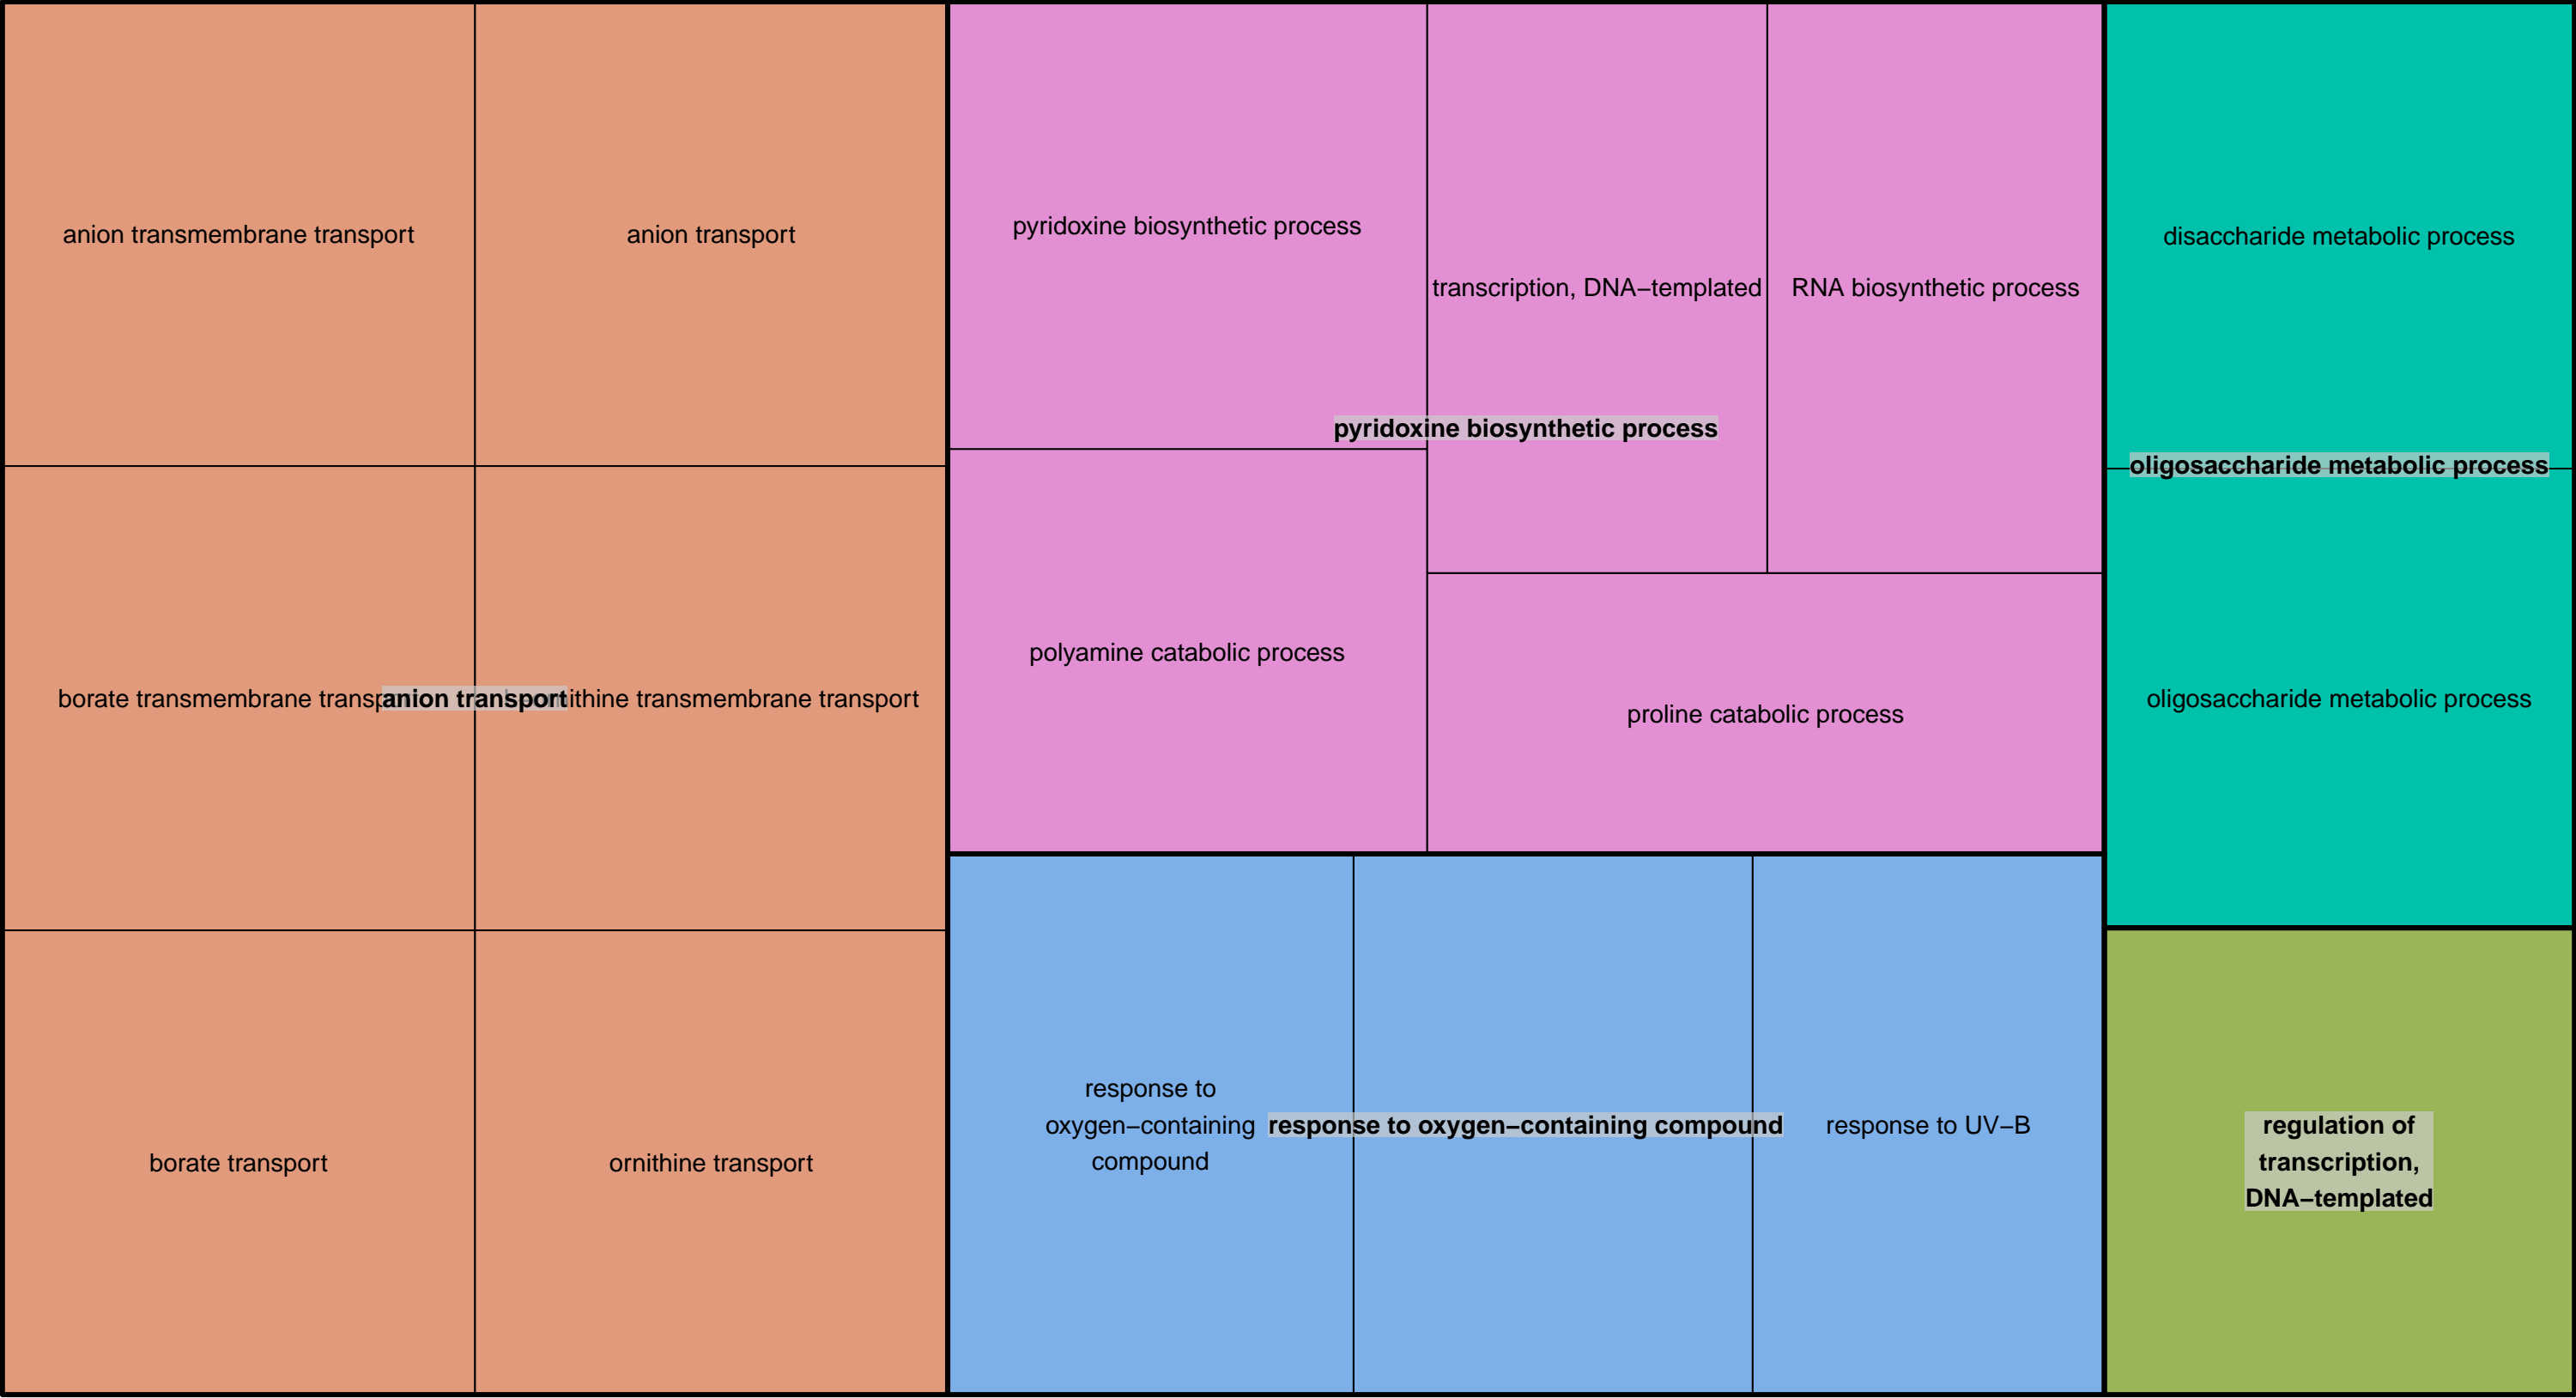

Supplement: s1 [file s1]

REVIGO TreeMap

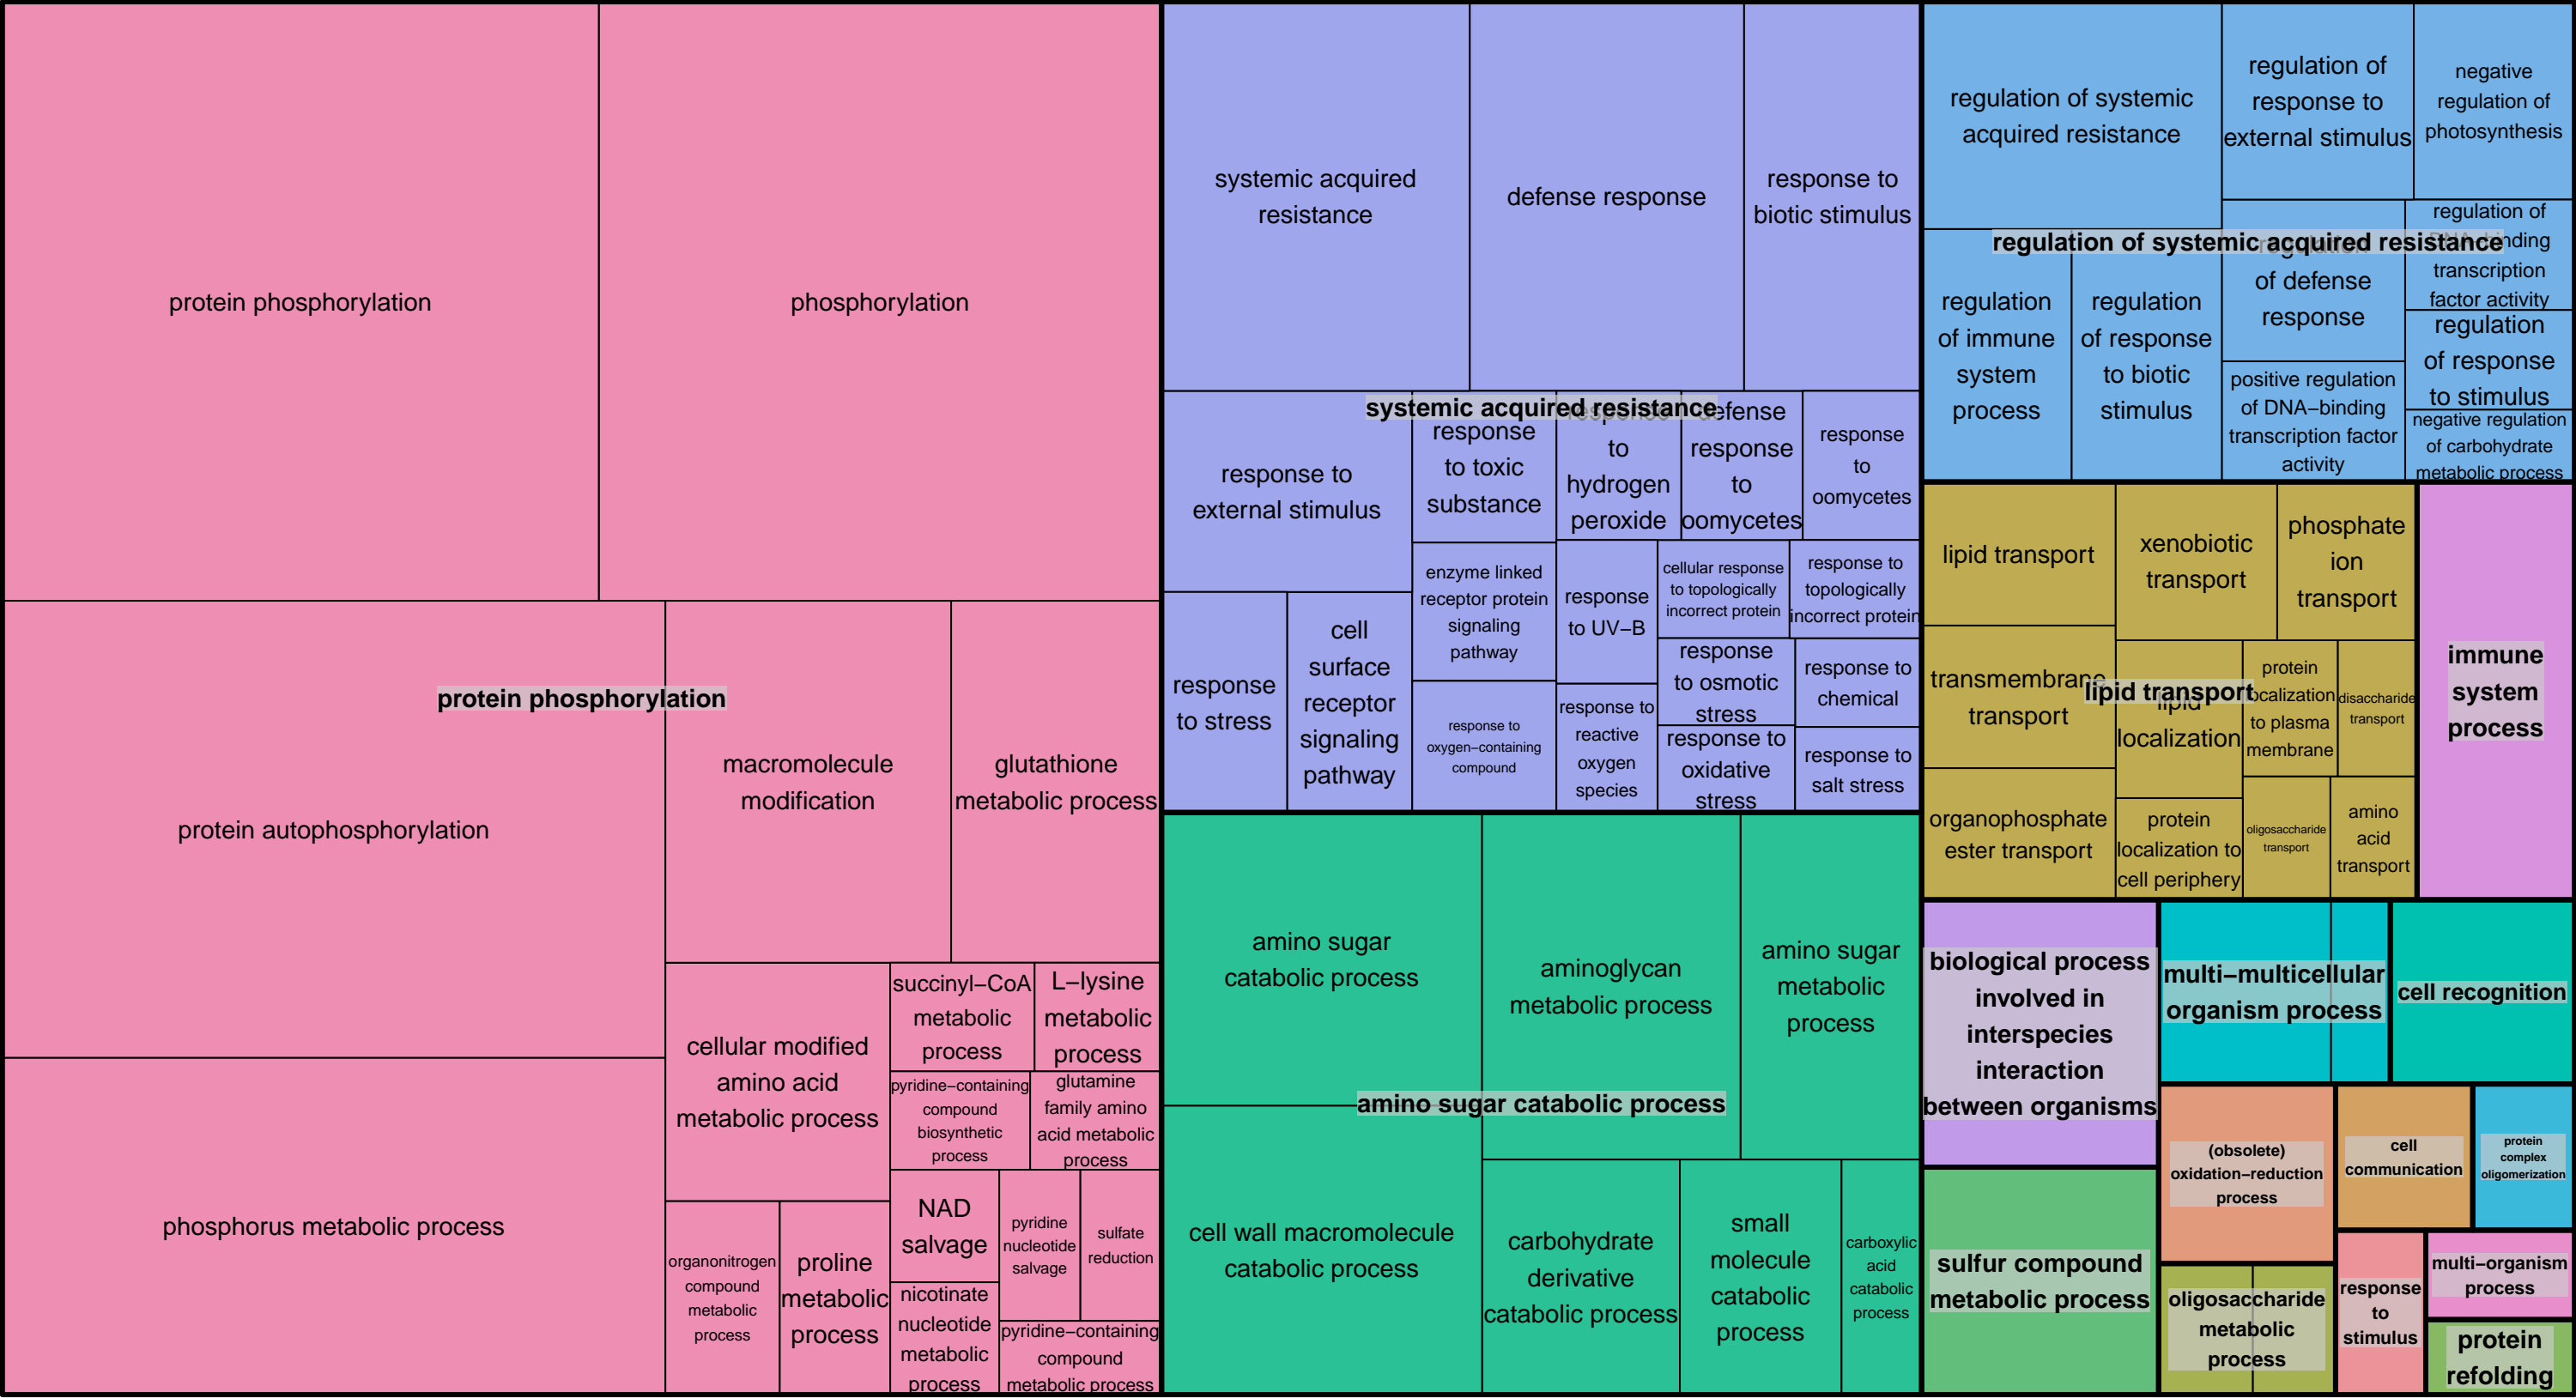

Supplement: s1 [file s1]

## REVIGO TreeMap

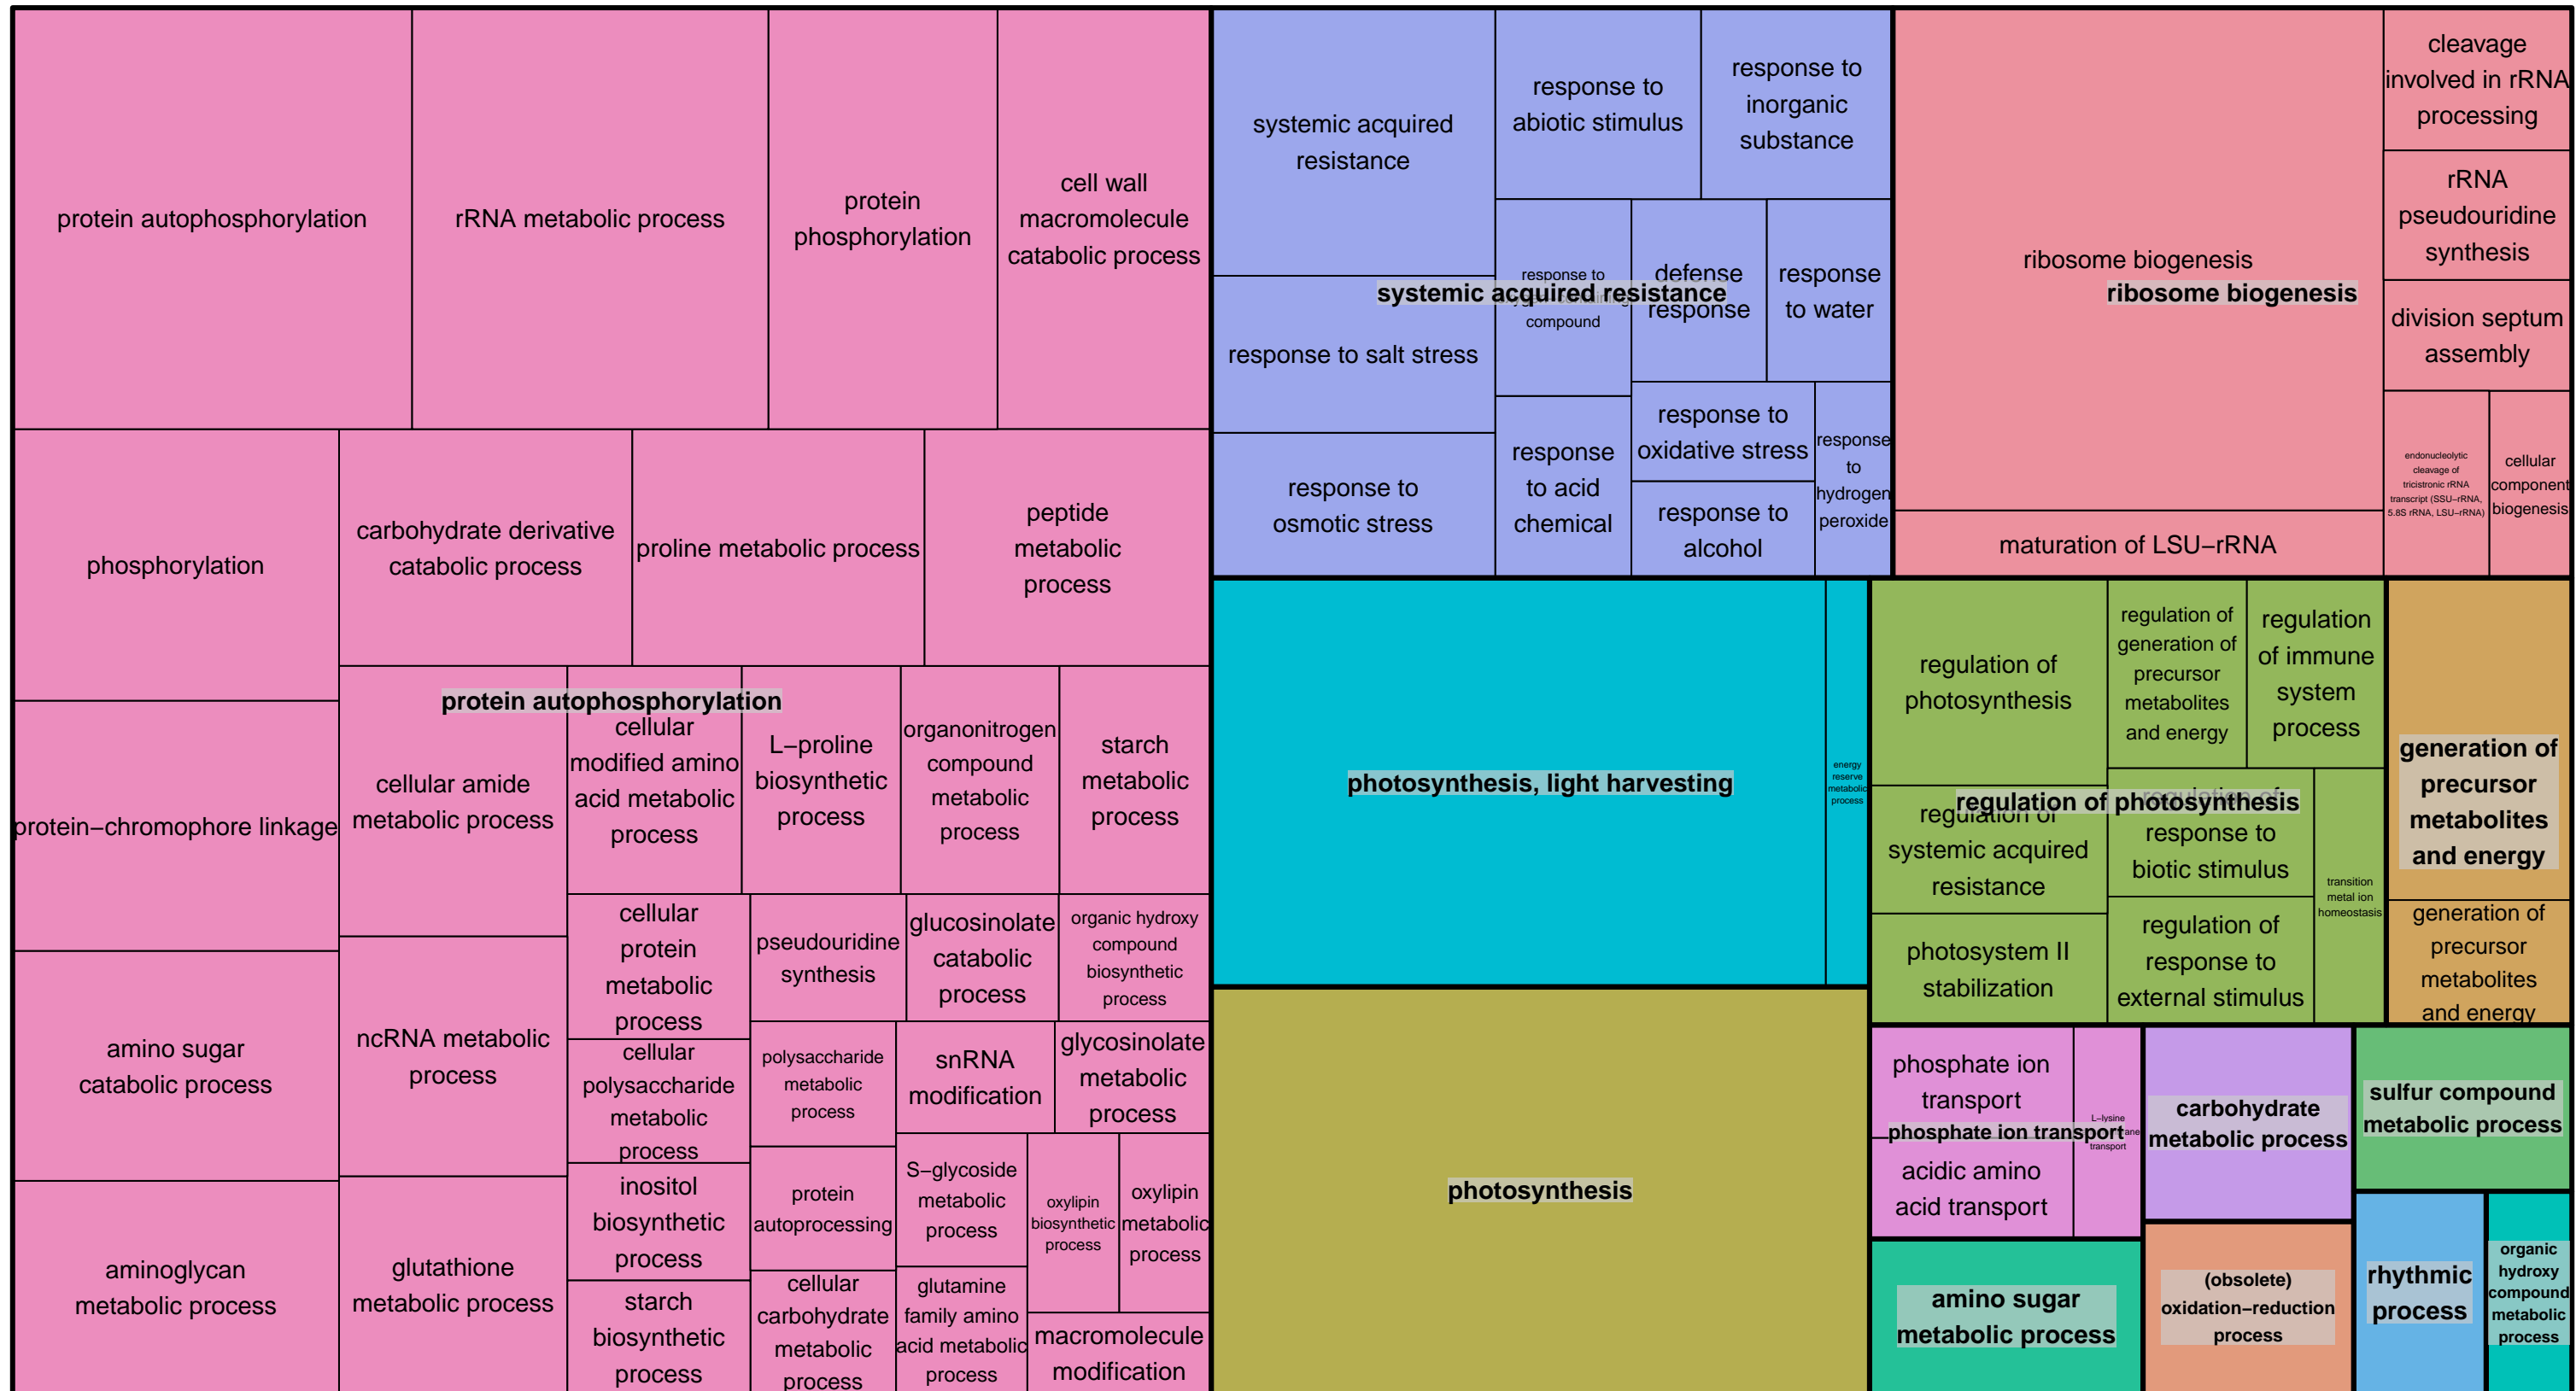

Supplement: s1 [file s1]
